# Supplementary material for: TMSOTf-mediated Kröhnke pyridine synthesis using HMDS as the nitrogen source under microwave irradiation
Source: PubMed Central journal article supplement — RSC Adv. 2022 Mar 15;12(13):8263–73. doi: 10.1039/d2ra00084a (PMC8982443; doi:10.1039/d2ra00084a), 2022-03-15

# Supporting Information

## TMSOTf-mediated Kröhnke Pyridines Synthesis Using HMDS as Nitrogen Source under Microwave Irradiation

Chieh-Kai Chan,\* Yi-Hsiu Chung and Cheng-Chung Wang\*

*Institute of Chemistry, Academia Sinica, Taipei 115, Taiwan*

E-mail: [ckc@gate.sinica.edu.tw](mailto:ckc@gate.sinica.edu.tw) and [wangcc7280@gate.sinica.edu.tw](mailto:wangcc7280@gate.sinica.edu.tw)

|                                                                                                                                                          |           |
|----------------------------------------------------------------------------------------------------------------------------------------------------------|-----------|
| I. Table of Compound Structures and Corresponding Page Numbers.....                                                                                      | S-2~S-3   |
| II. Crystal Data for Compounds <b>2q</b> and <b>4</b> .....                                                                                              | S-4~S-5   |
| III. Scanned Photocopies of <sup>1</sup> H and <sup>13</sup> C NMR Spectra for Compounds <b>2a-2ab</b> , <b>3a-3n</b> , <b>3r-3aa</b> and <b>4</b> ..... | S-6~S-109 |

|                                                                                     |                                                                                     |                                                                                      |                                                                                       |
|-------------------------------------------------------------------------------------|-------------------------------------------------------------------------------------|--------------------------------------------------------------------------------------|---------------------------------------------------------------------------------------|
| <b>Compound 2a (S-6~S-7)</b>                                                        | <b>Compound 3a (S-8~S-9)</b>                                                        | <b>Compound 2b (S-10~S-11)</b>                                                       | <b>Compound 3b (S-12~S-13)</b>                                                        |
| 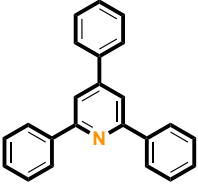   |    |    |    |
| <b>Compound 2c (S-14~S-15)</b>                                                      | <b>Compound 3c (S-16~S-17)</b>                                                      | <b>Compound 2d (S-18~S-19)</b>                                                       | <b>Compound 3d (S-20~S-21)</b>                                                        |
|    |    |    |    |
| <b>Compound 2e (S-22~S-23)</b>                                                      | <b>Compound 3e (S-24~S-25)</b>                                                      | <b>Compound 2f (S-26~S-27)</b>                                                       | <b>Compound 3f (S-28~S-29)</b>                                                        |
|    |    |    |    |
| <b>Compound 2g (S-30~S-31)</b>                                                      | <b>Compound 3g (S-32~S-33)</b>                                                      | <b>Compound 2h (S-34~S-35)</b>                                                       | <b>Compound 3h (S-36~S-37)</b>                                                        |
|  |  |  |  |
| <b>Compound 2i (S-38~S-39)</b>                                                      | <b>Compound 3i (S-40~S-41)</b>                                                      | <b>Compound 2j (S-42~S-43)</b>                                                       | <b>Compound 3j (S-44~S-45)</b>                                                        |
|  |  |  |  |
| <b>Compound 2k (S-46~S-47)</b>                                                      | <b>Compound 3k (S-48~S-49)</b>                                                      | <b>Compound 2l (S-50~S-51)</b>                                                       | <b>Compound 3l (S-52~S-53)</b>                                                        |
|  |  |  |  |
| <b>Compound 2m (S-54~S-55)</b>                                                      | <b>Compound 3m (S-56~S-57)</b>                                                      | <b>Compound 2n (S-58~S-59)</b>                                                       | <b>Compound 3n (S-60~S-61)</b>                                                        |
|  |  |  |  |

|                                      |                                       |                                       |                                       |
|--------------------------------------|---------------------------------------|---------------------------------------|---------------------------------------|
| <b>Compound 2o (S-62~S-63)</b><br>   | <b>Compound 2p (S-64~S-65)</b><br>    | <b>Compound 2q (S-66~S-67)</b><br>    | <b>Compound 2r (S-68~S-69)</b><br>    |
| <b>Compound 3r (S-70~S-71)</b><br>   | <b>Compound 2s (S-72~S-73)</b><br>    | <b>Compound 3s (S-74~S-75)</b><br>    | <b>Compound 2t (S-76~S-77)</b><br>    |
| <b>Compound 3t (S-78~S-79)</b><br>   | <b>Compound 2u (S-80~S-81)</b><br>    | <b>Compound 3u (S-82~S-83)</b><br>    | <b>Compound 2v (S-84~S-85)</b><br>    |
| <b>Compound 3v (S-86~S-87)</b><br>   | <b>Compound 2w (S-88~S-89)</b><br>    | <b>Compound 3w (S-90~S-91)</b><br>    | <b>Compound 2x (S-92~S-93)</b><br>    |
| <b>Compound 3x (S-94~S-95)</b><br>   | <b>Compound 2y (S-96~S-97)</b><br>    | <b>Compound 3y (S-98~S-99)</b><br>    | <b>Compound 2z (S-100~S-101)</b><br>  |
| <b>Compound 3z (S-102~S-103)</b><br> | <b>Compound 2aa (S-104~S-105)</b><br> | <b>Compound 3aa (S-106~S-107)</b><br> | <b>Compound 2ab (S-108~S-109)</b><br> |
| <b>Compound 4 (S-110~S-111)</b><br>  |                                       |                                       |                                       |

Crystal data and structure refinement for compound **2q**  
(the thermal ellipsoid was drawn at the 50% probability level)

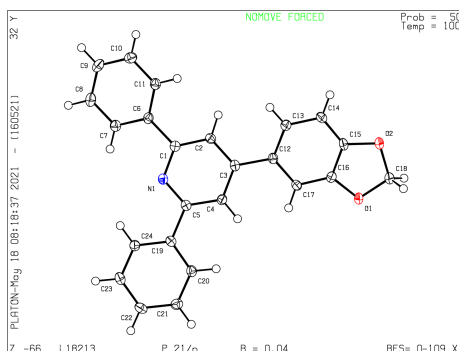

|                                   |                                                  |                   |
|-----------------------------------|--------------------------------------------------|-------------------|
| Identification code               | i18213                                           |                   |
| Empirical formula                 | C <sub>24</sub> H <sub>17</sub> N O <sub>2</sub> |                   |
| Formula weight                    | 351.38                                           |                   |
| Temperature                       | 100.0(2) K                                       |                   |
| Wavelength                        | 0.71073 Å                                        |                   |
| Crystal system                    | Monoclinic                                       |                   |
| Space group                       | P 2 <sub>1</sub> /n                              |                   |
| Unit cell dimensions              | a = 6.4058(2) Å                                  | a = 90°.          |
|                                   | b = 12.1092(3) Å                                 | b = 92.2490(10)°. |
|                                   | c = 21.6453(7) Å                                 | g = 90°.          |
| Volume                            | 1677.71(9) Å <sup>3</sup>                        |                   |
| Z, Density (calculated)           | 4, 1.391 Mg/m <sup>3</sup>                       |                   |
| Absorption coefficient            | 0.089 mm <sup>-1</sup>                           |                   |
| F(000)                            | 736                                              |                   |
| Crystal size                      | 0.362 x 0.284 x 0.090 mm <sup>3</sup>            |                   |
| Theta range for data collection   | 1.927 to 27.102°.                                |                   |
| Index ranges                      | -8<=h<=8, -15<=k<=15, -27<=l<=27                 |                   |
| Reflections collected             | 50975                                            |                   |
| Independent reflections           | 3704 [R(int) = 0.0627]                           |                   |
| Completeness to theta = 25.242°   | 99.7 %                                           |                   |
| Absorption correction             | Numerical                                        |                   |
| Max. and min. transmission        | 1 and 0.888                                      |                   |
| Refinement method                 | Full-matrix least-squares on F <sup>2</sup>      |                   |
| Data / restraints / parameters    | 3704 / 0 / 245                                   |                   |
| Goodness-of-fit on F <sup>2</sup> | 1.029                                            |                   |
| Final R indices [I>2sigma(I)]     | R1 = 0.0354, wR2 = 0.0912                        |                   |
| R indices (all data)              | R1 = 0.0412, wR2 = 0.0956                        |                   |
| Extinction coefficient            | 0.016(3)                                         |                   |
| Largest diff. peak and hole       | 0.301 and -0.182 e.Å <sup>-3</sup>               |                   |

Crystal data and structure refinement for compound **4**  
(the thermal ellipsoid was drawn at the 50% probability level)

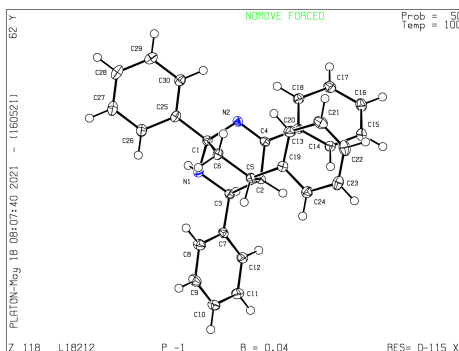

|                                   |                                                |                   |
|-----------------------------------|------------------------------------------------|-------------------|
| Identification code               | i18212                                         |                   |
| Empirical formula                 | C <sub>30</sub> H <sub>26</sub> N <sub>2</sub> |                   |
| Formula weight                    | 414.53                                         |                   |
| Temperature                       | 100.0(2) K                                     |                   |
| Wavelength                        | 0.71073 Å                                      |                   |
| Crystal system                    | Triclinic                                      |                   |
| Space group                       | P -1                                           |                   |
| Unit cell dimensions              | a = 9.8179(3) Å                                | a = 76.3210(10)°. |
|                                   | b = 10.4973(3) Å                               | b = 87.7270(10)°. |
|                                   | c = 11.9206(3) Å                               | g = 66.7560(10)°. |
| Volume                            | 1094.83(5) Å <sup>3</sup>                      |                   |
| Z, Density (calculated)           | 2, 1.257 Mg/m <sup>3</sup>                     |                   |
| Absorption coefficient            | 0.073 mm <sup>-1</sup>                         |                   |
| F(000)                            | 440                                            |                   |
| Crystal size                      | 0.369 x 0.277 x 0.214 mm <sup>3</sup>          |                   |
| Theta range for data collection   | 1.761 to 30.034°.                              |                   |
| Index ranges                      | -13<=h<=13, -14<=k<=14, -16<=l<=16             |                   |
| Reflections collected             | 54798                                          |                   |
| Independent reflections           | 6393 [R(int) = 0.0439]                         |                   |
| Completeness to theta = 25.242°   | 99.6 %                                         |                   |
| Absorption correction             | Numerical                                      |                   |
| Max. and min. transmission        | 1 and 0.9701                                   |                   |
| Refinement method                 | Full-matrix least-squares on F <sup>2</sup>    |                   |
| Data / restraints / parameters    | 6393 / 0 / 293                                 |                   |
| Goodness-of-fit on F <sup>2</sup> | 1.032                                          |                   |
| Final R indices [I>2sigma(I)]     | R1 = 0.0423, wR2 = 0.1058                      |                   |
| R indices (all data)              | R1 = 0.0529, wR2 = 0.1131                      |                   |
| Extinction coefficient            | n/a                                            |                   |
| Largest diff. peak and hole       | 0.392 and -0.233 e.Å <sup>-3</sup>             |                   |

# Compound 2a

1H YHC-301 sep 28-30 (from406-2) Ph-Ph 0412

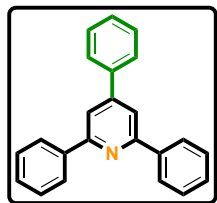

Compound 2a  
<sup>1</sup>H NMR (500 MHz, CDCl<sub>3</sub>) spectra

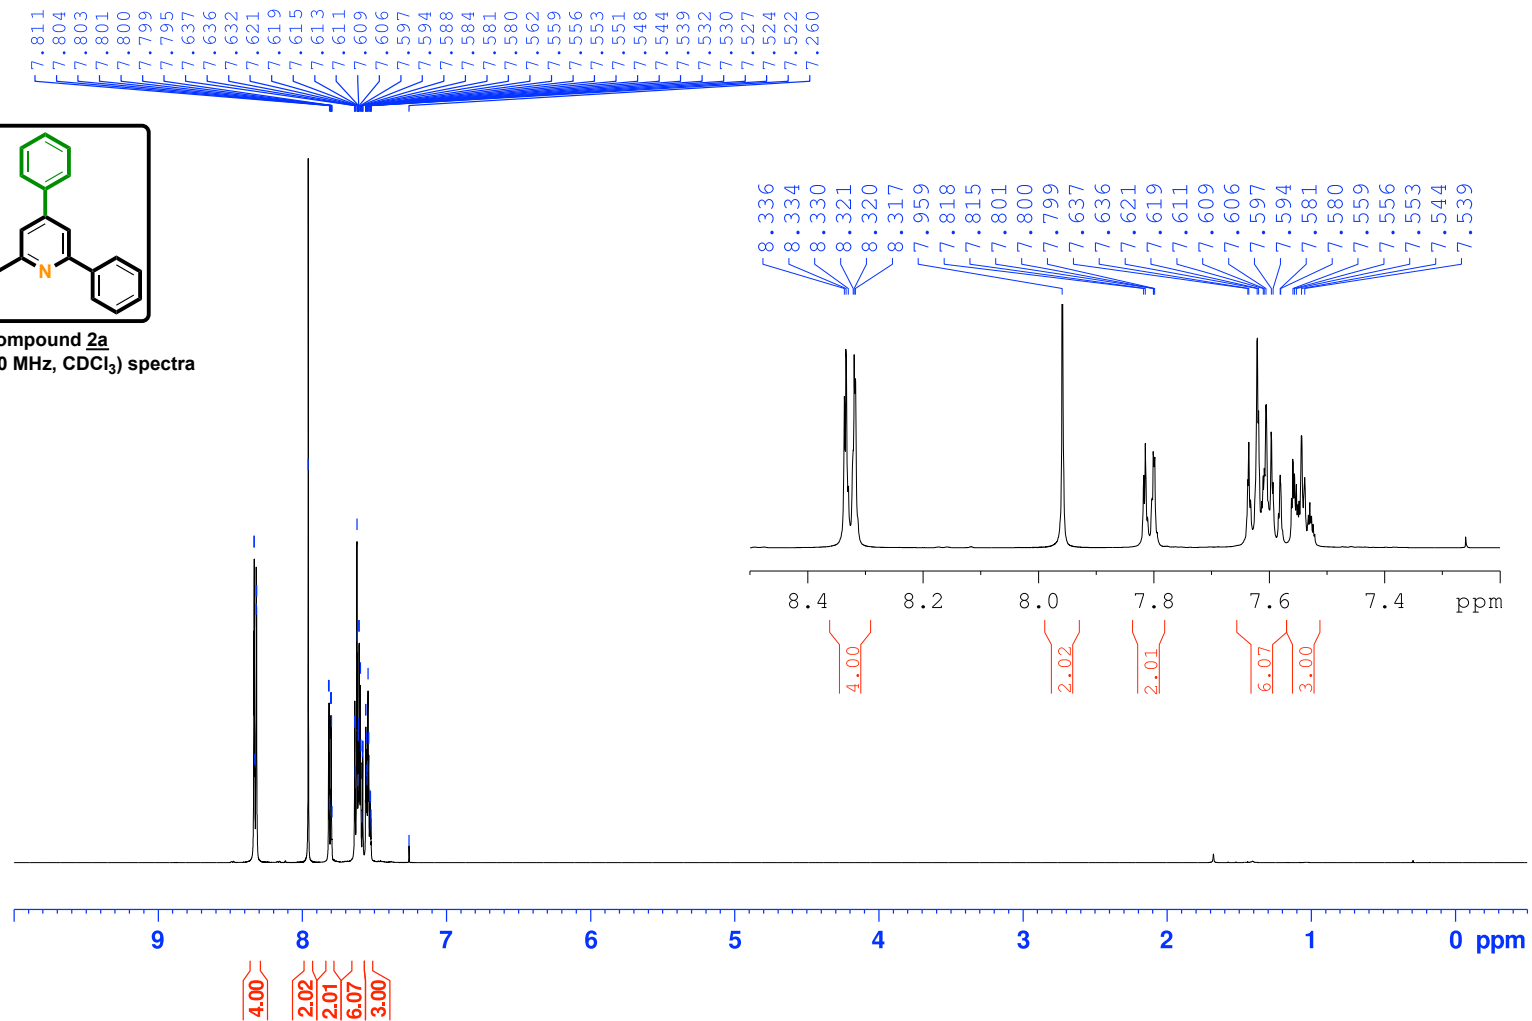

# Compound 2a

13C YHC-301 sep 28-30 (from406-2) Ph-Ph 0412

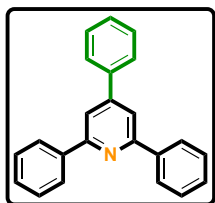

Compound 2a  
<sup>13</sup>C NMR (125 MHz, CDCl<sub>3</sub>) spectra

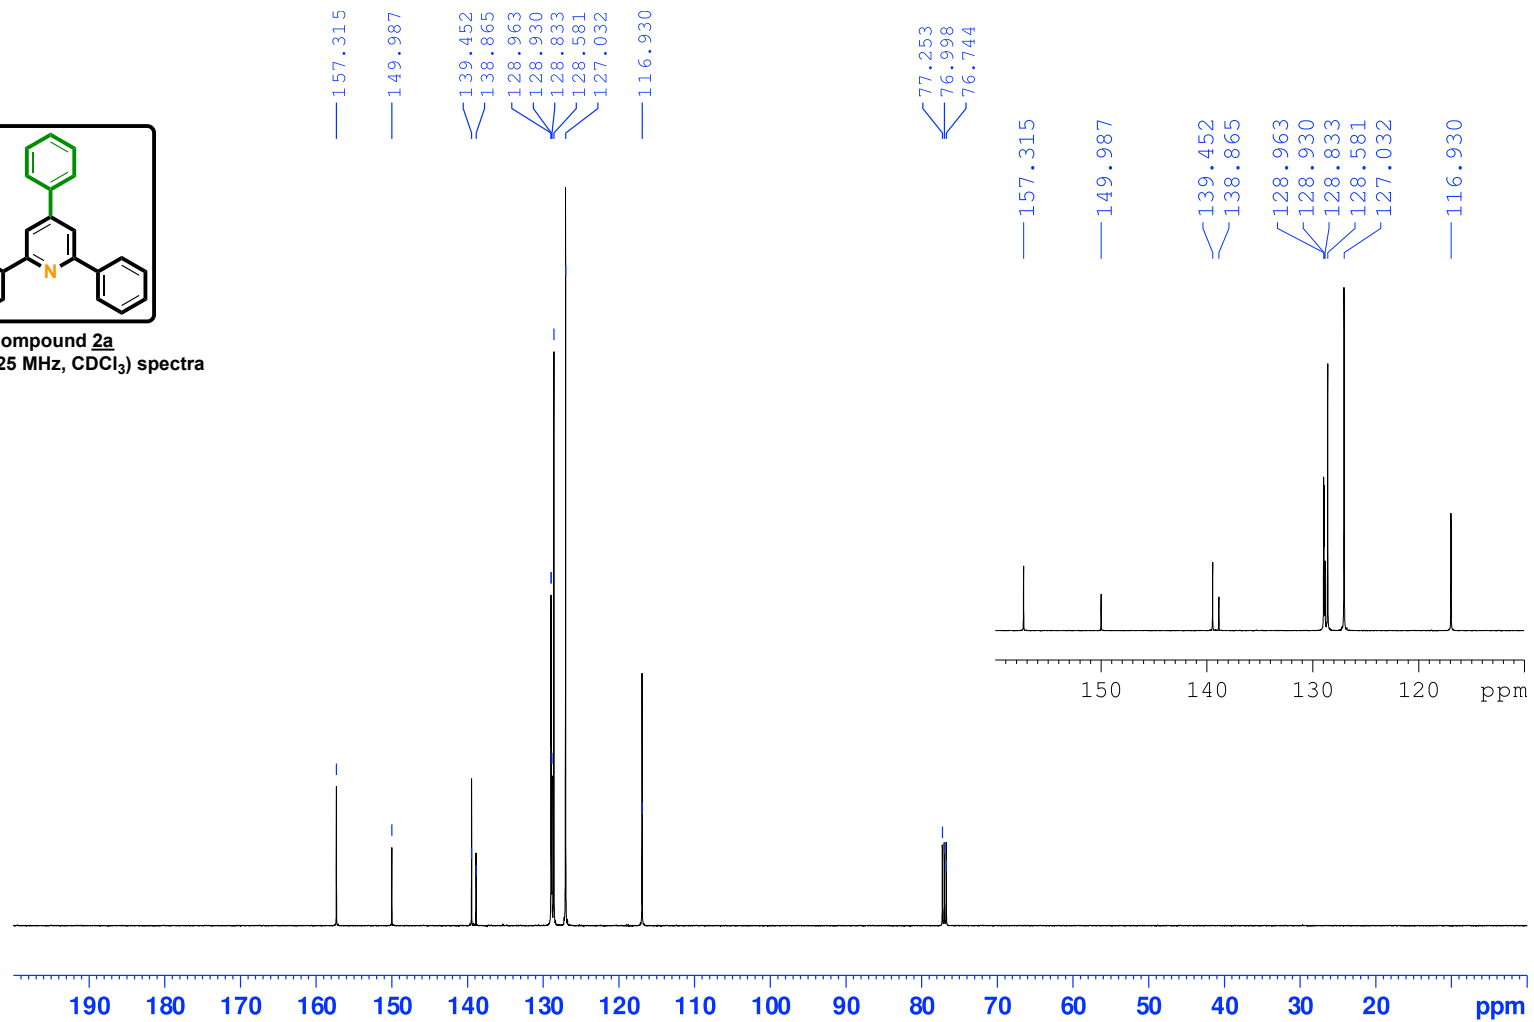

# Compound 3a

1H YHC-406-2 down 39-41 0412

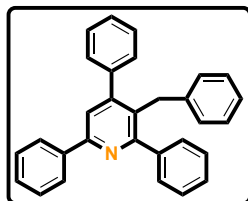

Compound 3a  
<sup>1</sup>H NMR (500 MHz, CDCl<sub>3</sub>) spectra

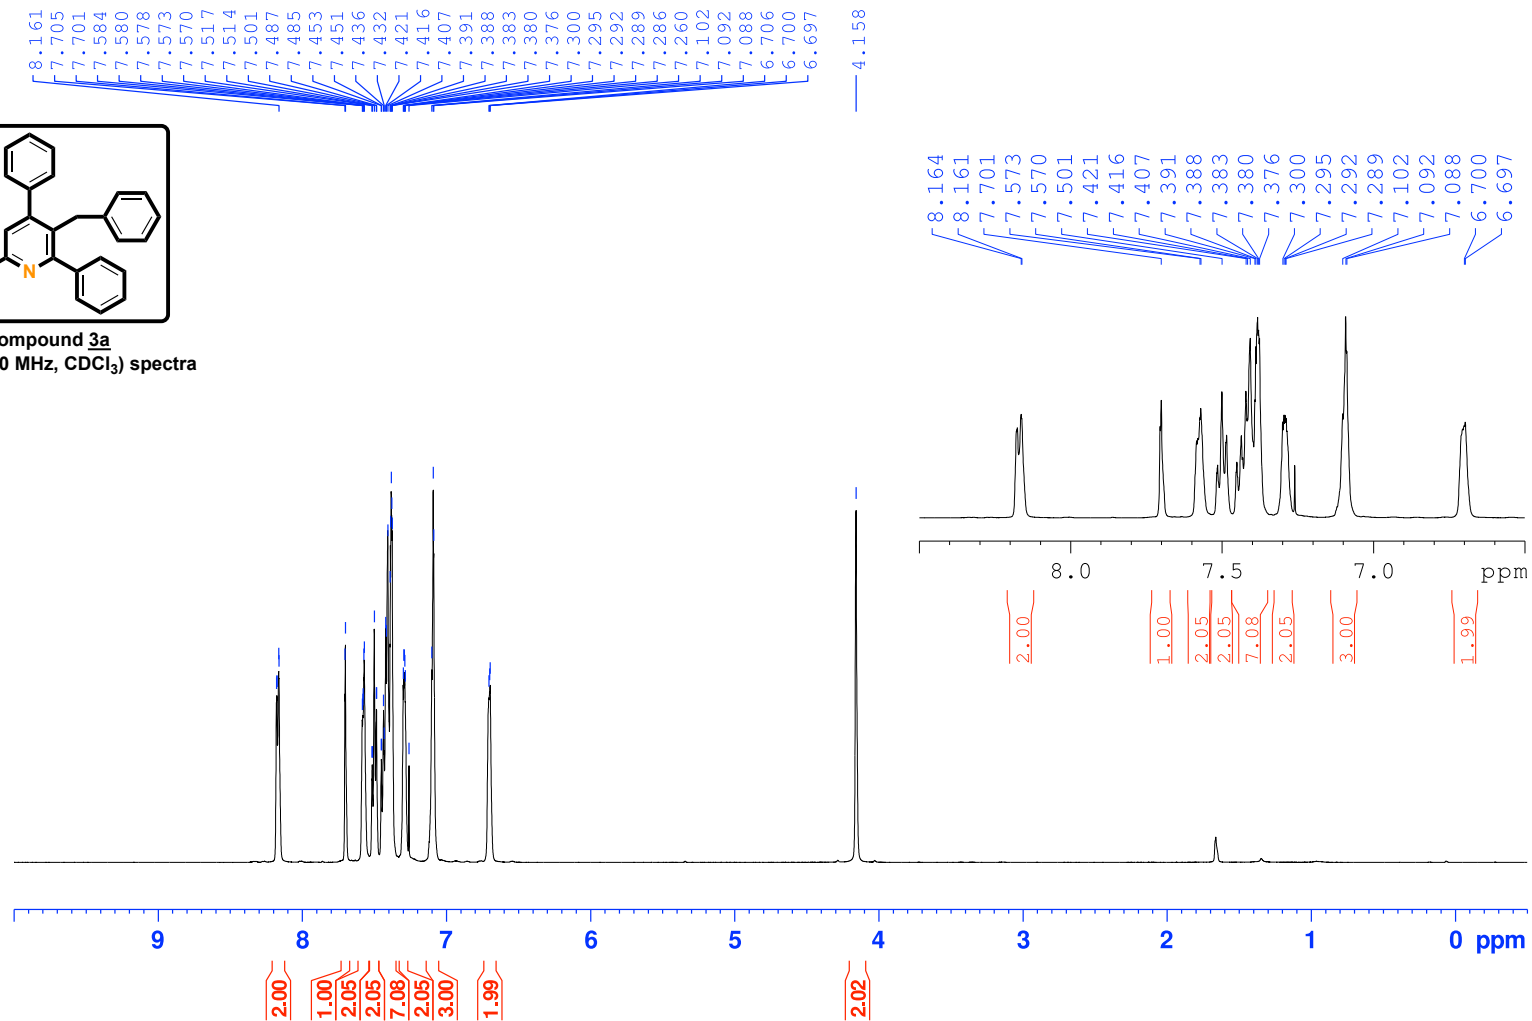



# Compound 3a

13C YHC-406-2 down 39-41 0412

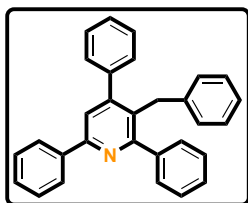

**Compound 3a**  
<sup>13</sup>C NMR (125 MHz, CDCl<sub>3</sub>) spectra

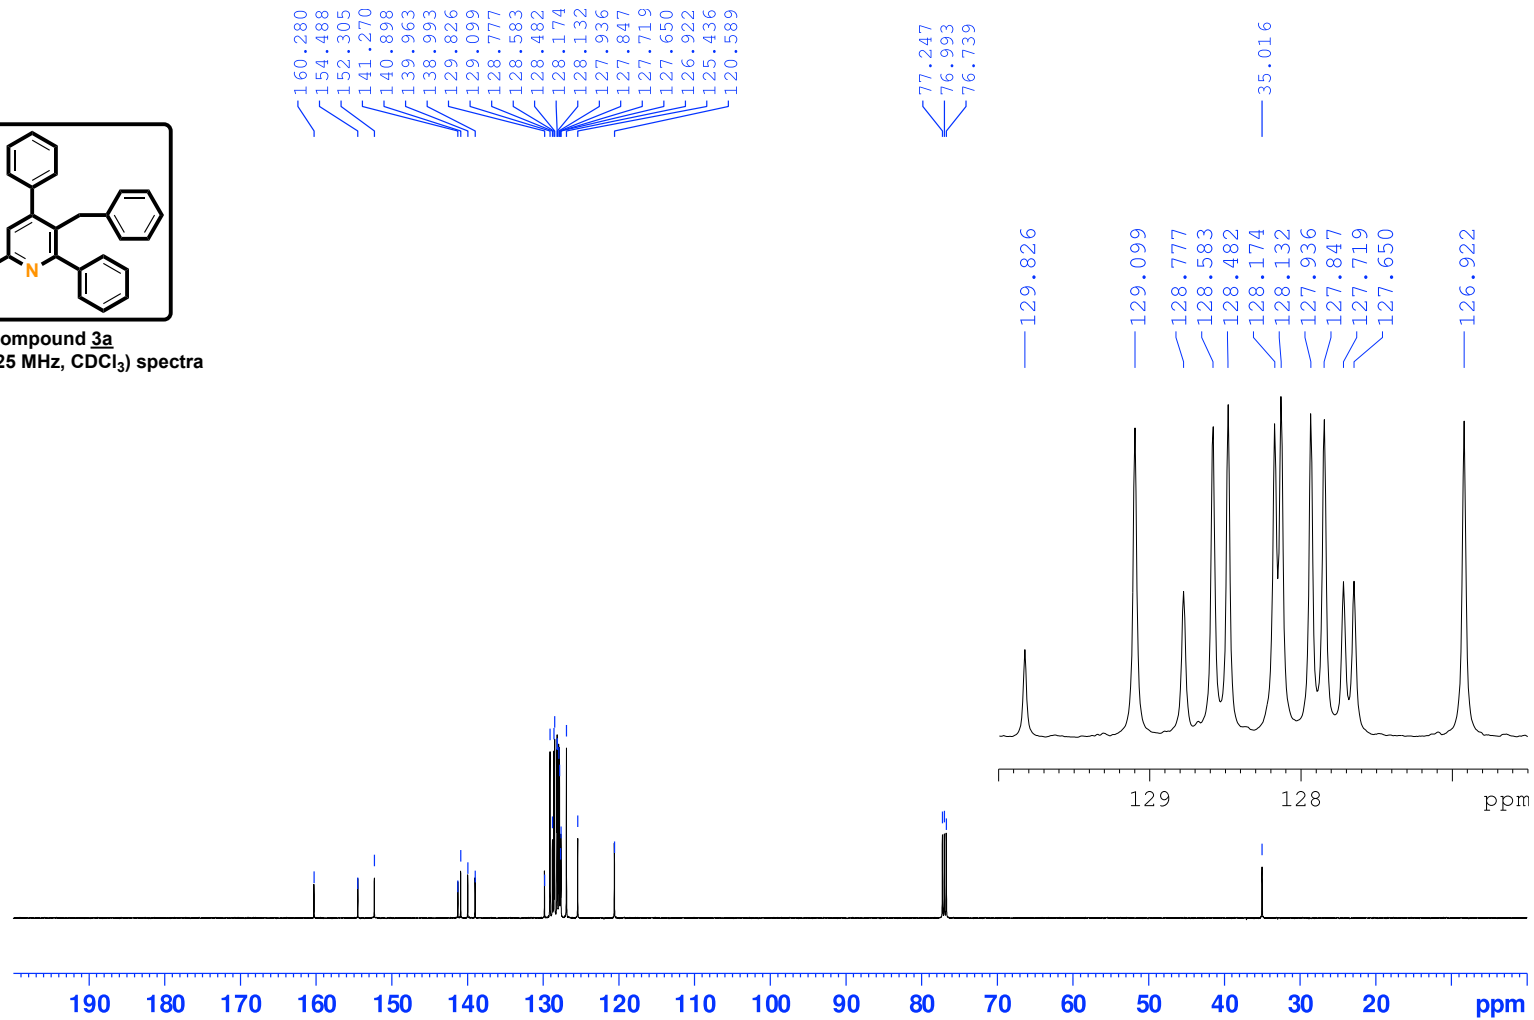

# Compound 2b

1H YHC-432 sep 3334 0518

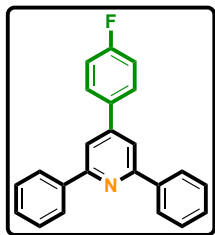

Compound 2b  
<sup>1</sup>H NMR (500 MHz, CDCl<sub>3</sub>) spectra

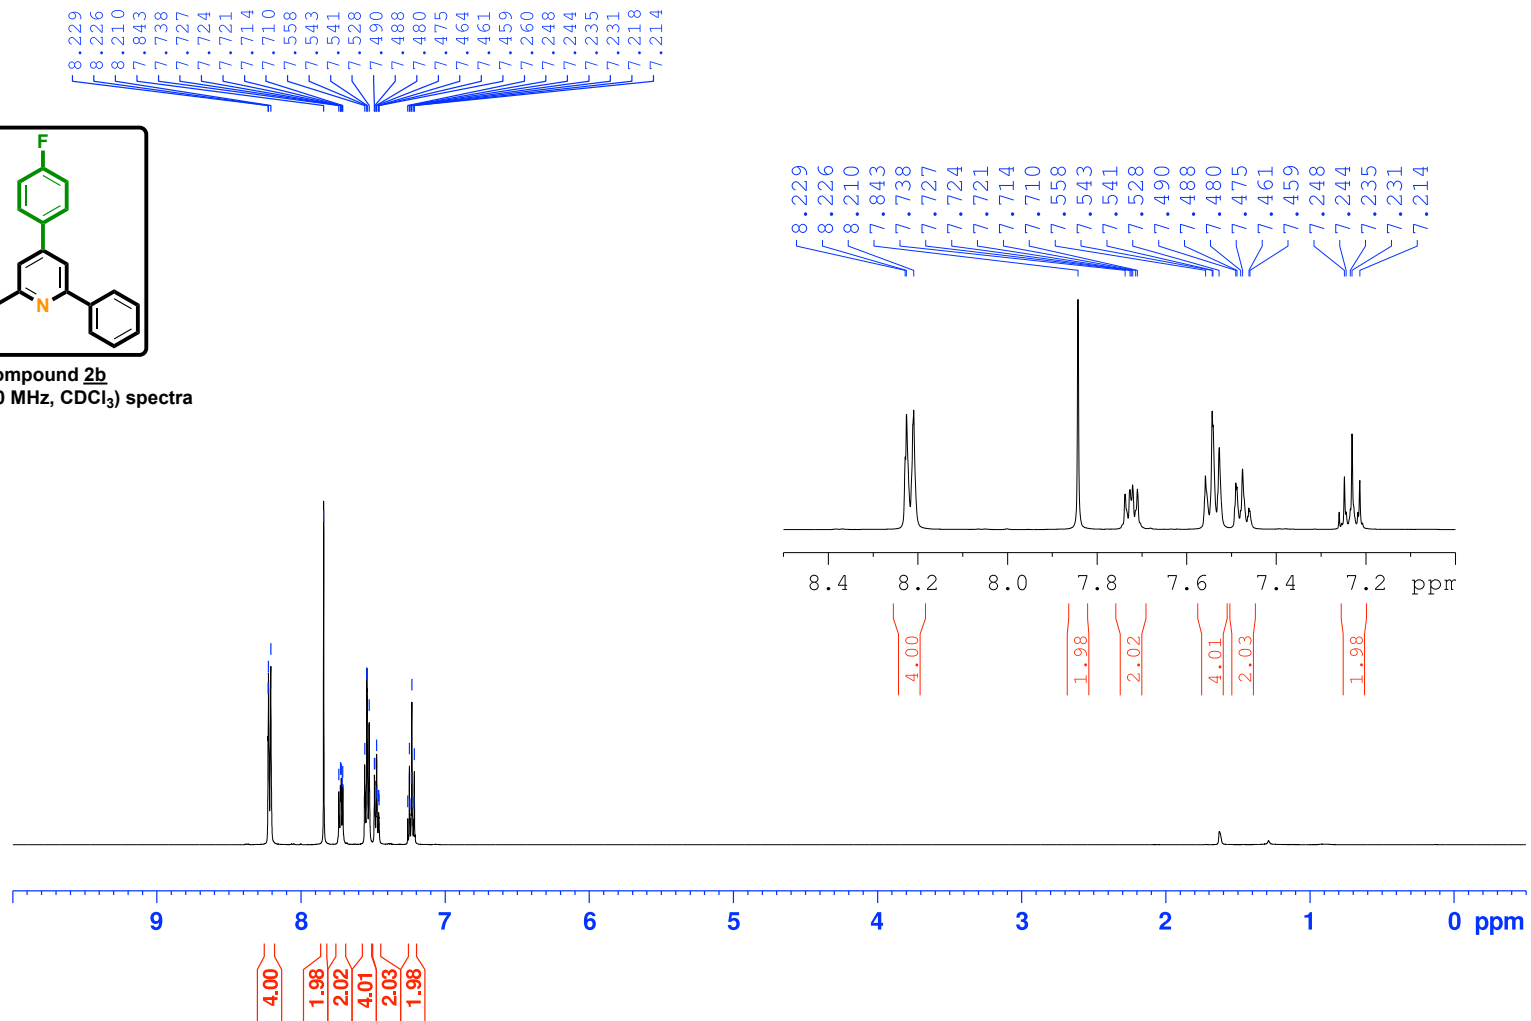

# Compound 2b

13C YHC-432 sep 3334 0518

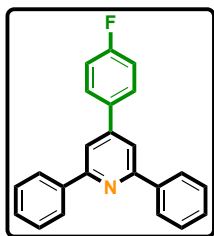

Compound 2b  
<sup>13</sup>C NMR (125 MHz, CDCl<sub>3</sub>) spectra

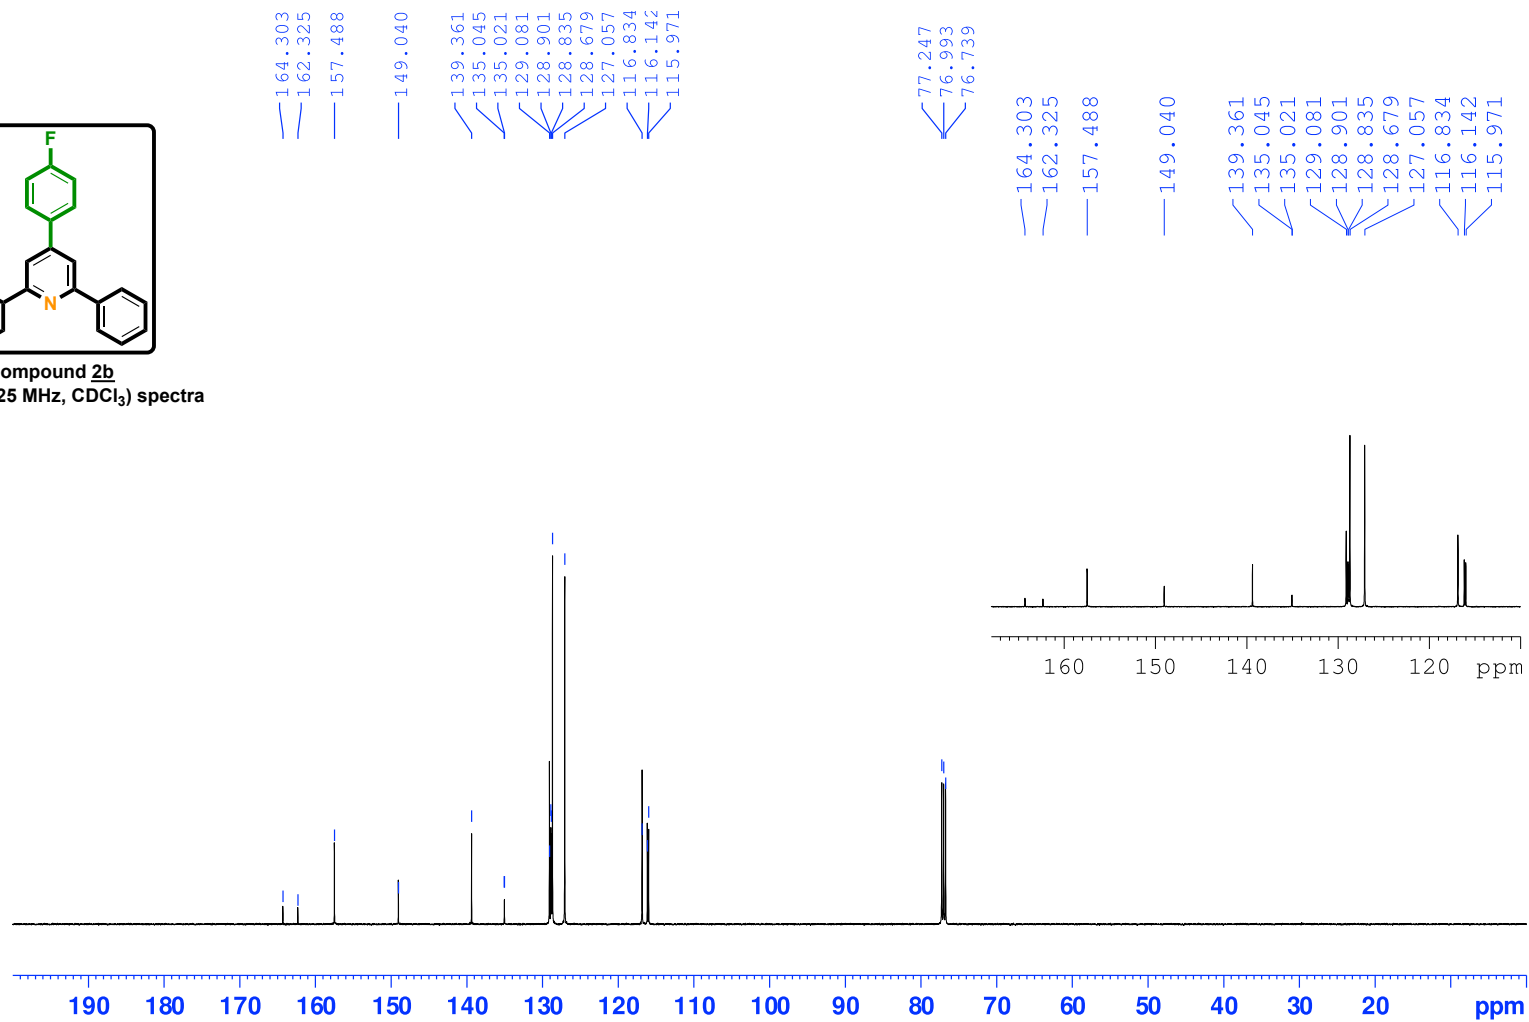

# Compound 3b

1H YHC-432 sep 5455 0518

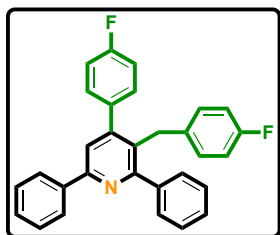

Compound 3b  
<sup>1</sup>H NMR (500 MHz, CDCl<sub>3</sub>) spectra

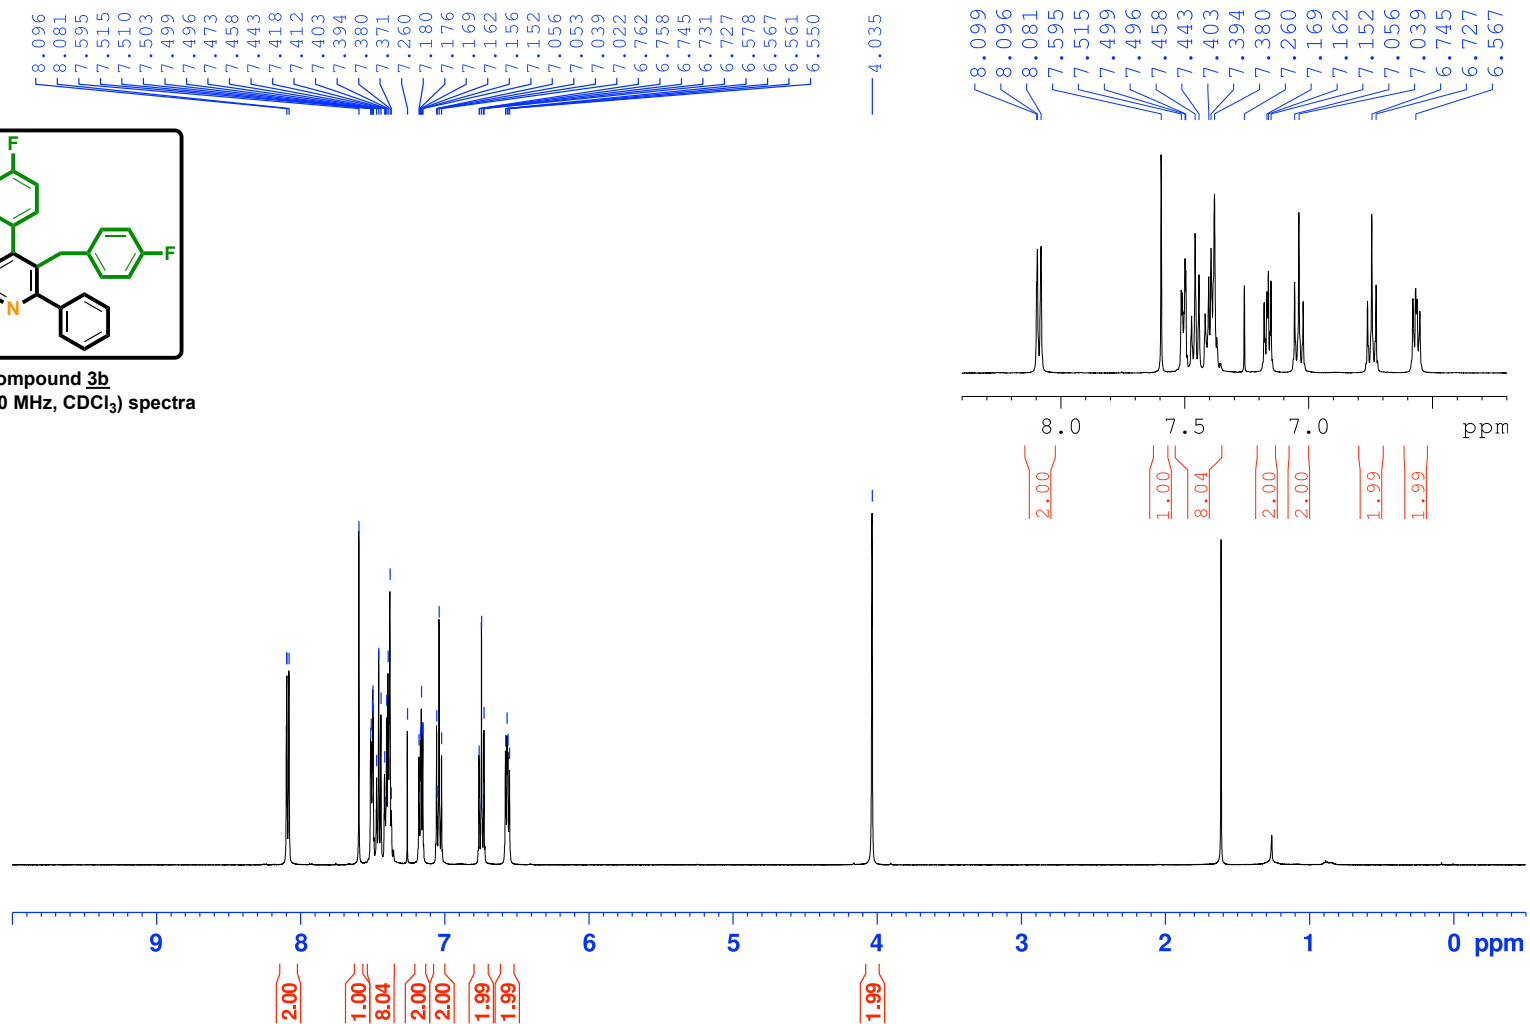

# Compound 3b

13C YHC-432 sep 5455 0518

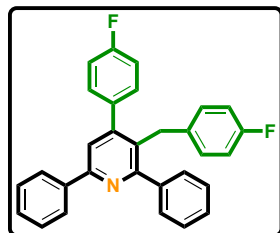

Compound 3b  
<sup>13</sup>C NMR (125 MHz, CDCl<sub>3</sub>) spectra

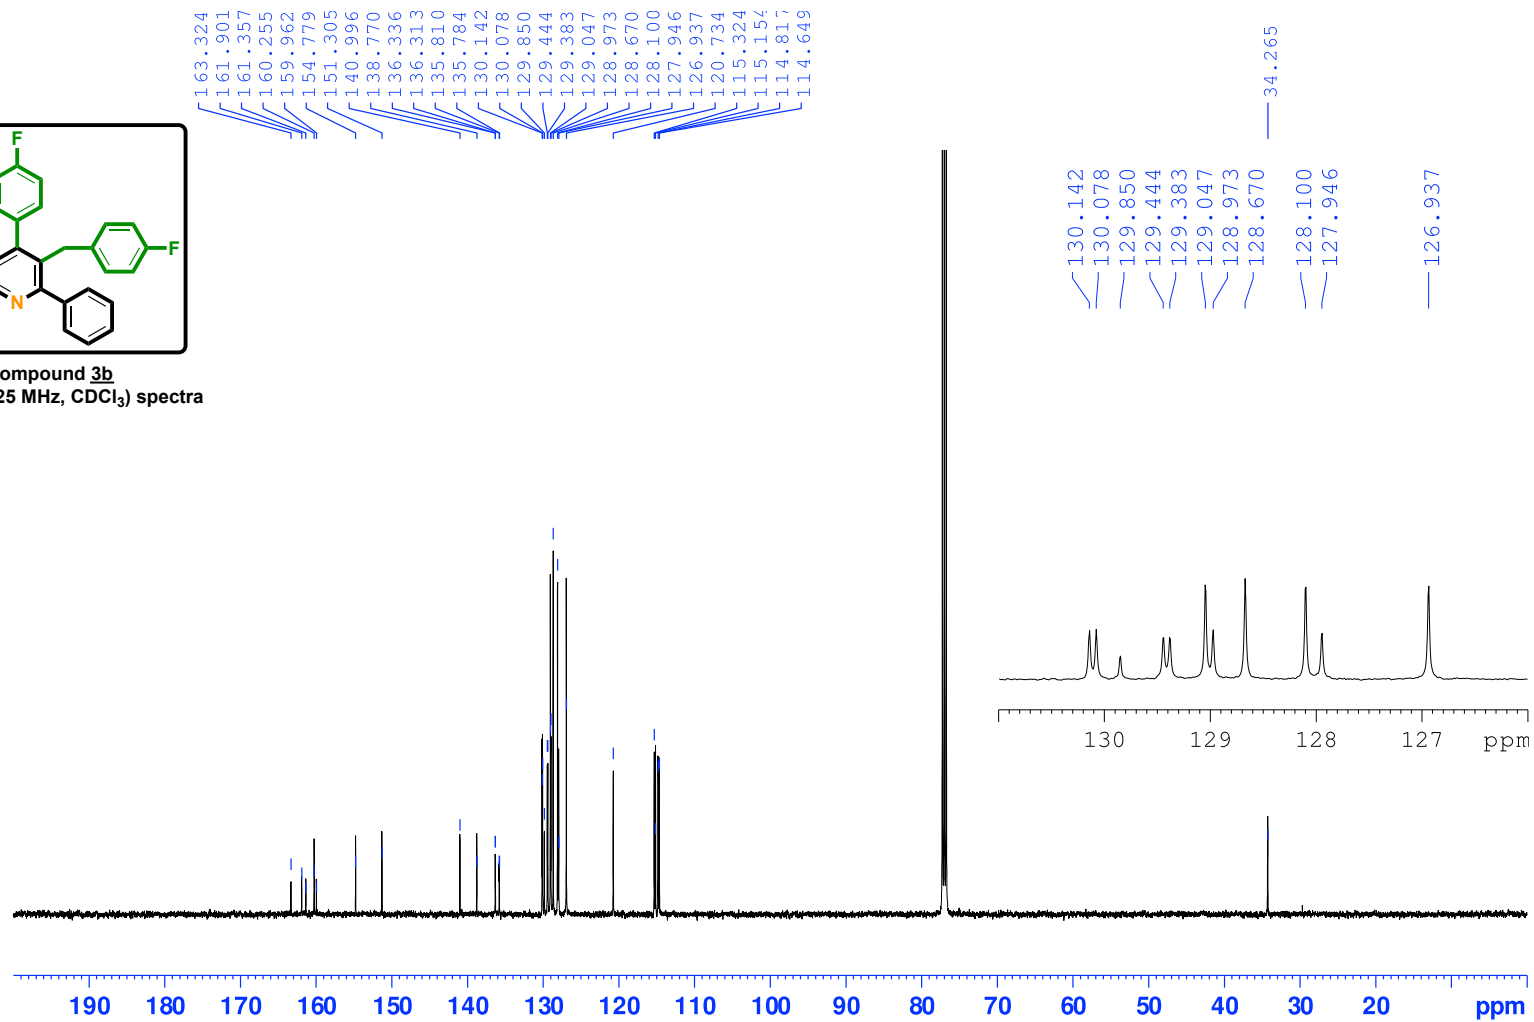

# Compound 2c

1H YHC-438-3 sep 6566 top 1103

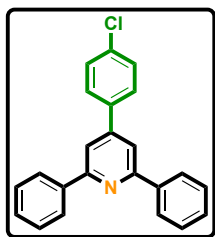

Compound 2c  
<sup>1</sup>H NMR (500 MHz, CDCl<sub>3</sub>) spectra

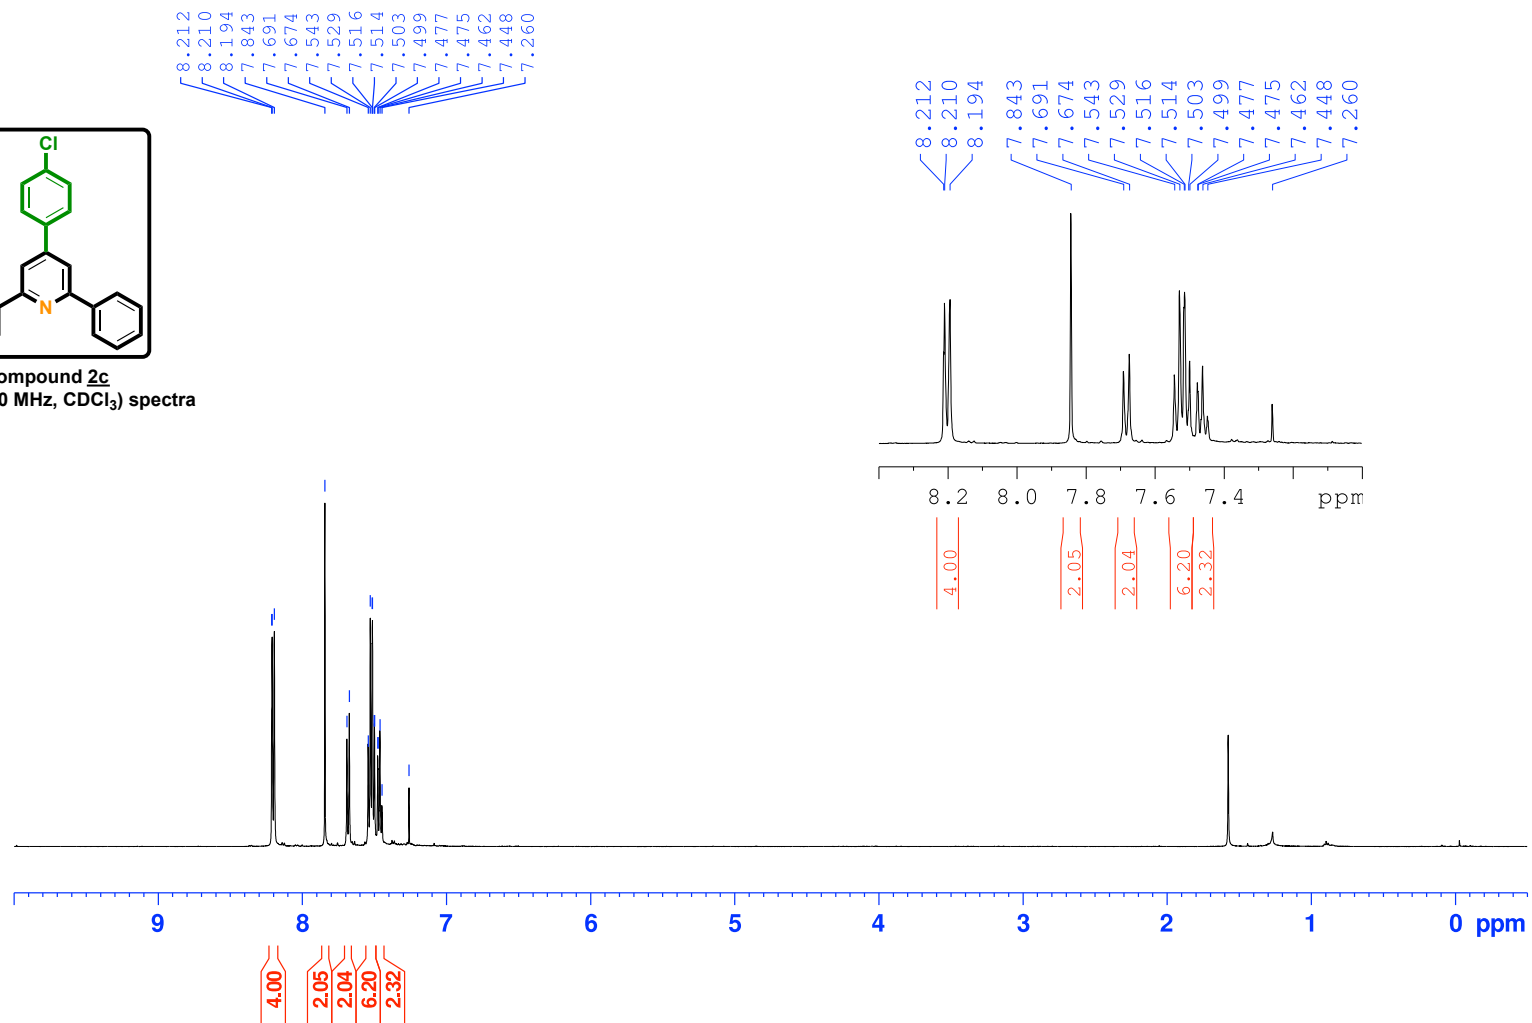

# Compound 2c

13C YHC-438-3 sep 6566 top 1103

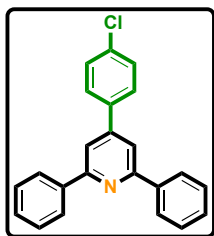

Compound 2c  
<sup>13</sup>C NMR (125 MHz, CDCl<sub>3</sub>) spectra

157.657  
148.915  
139.376  
137.460  
135.173  
129.309  
129.148  
128.720  
128.434  
127.104  
116.785  
77.254  
77.000  
76.746

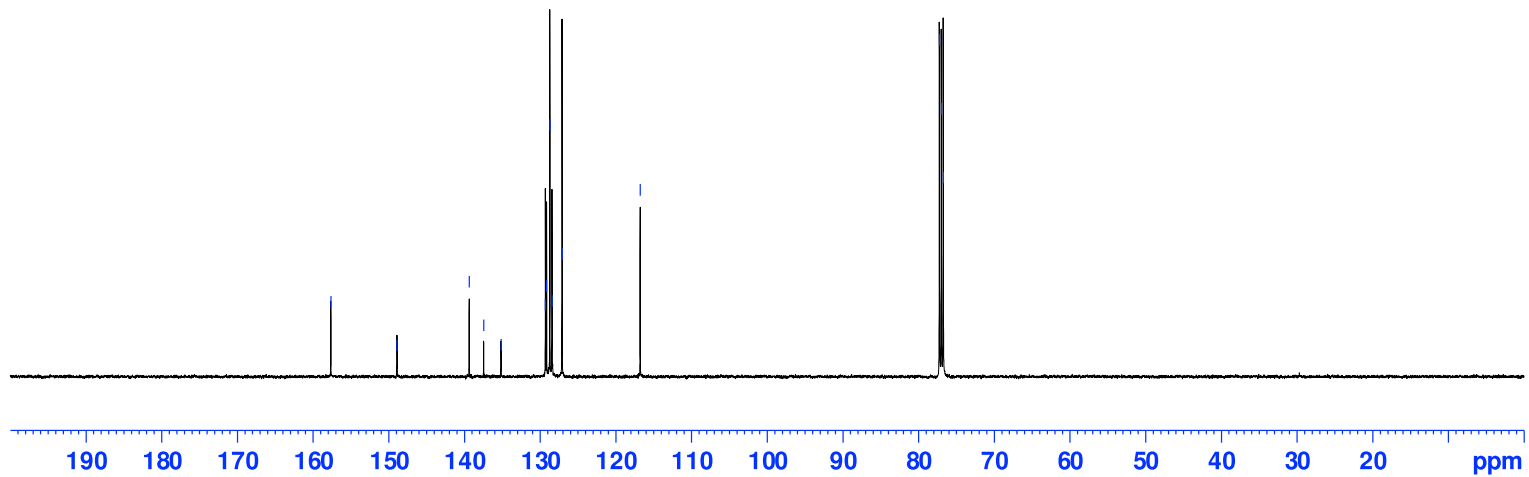

# Compound 3c

1H YHC-438-3 sep 7374 down 1103

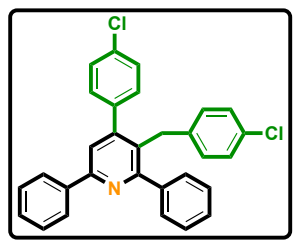

Compound 3c  
<sup>1</sup>H NMR (500 MHz, CDCl<sub>3</sub>) spectra

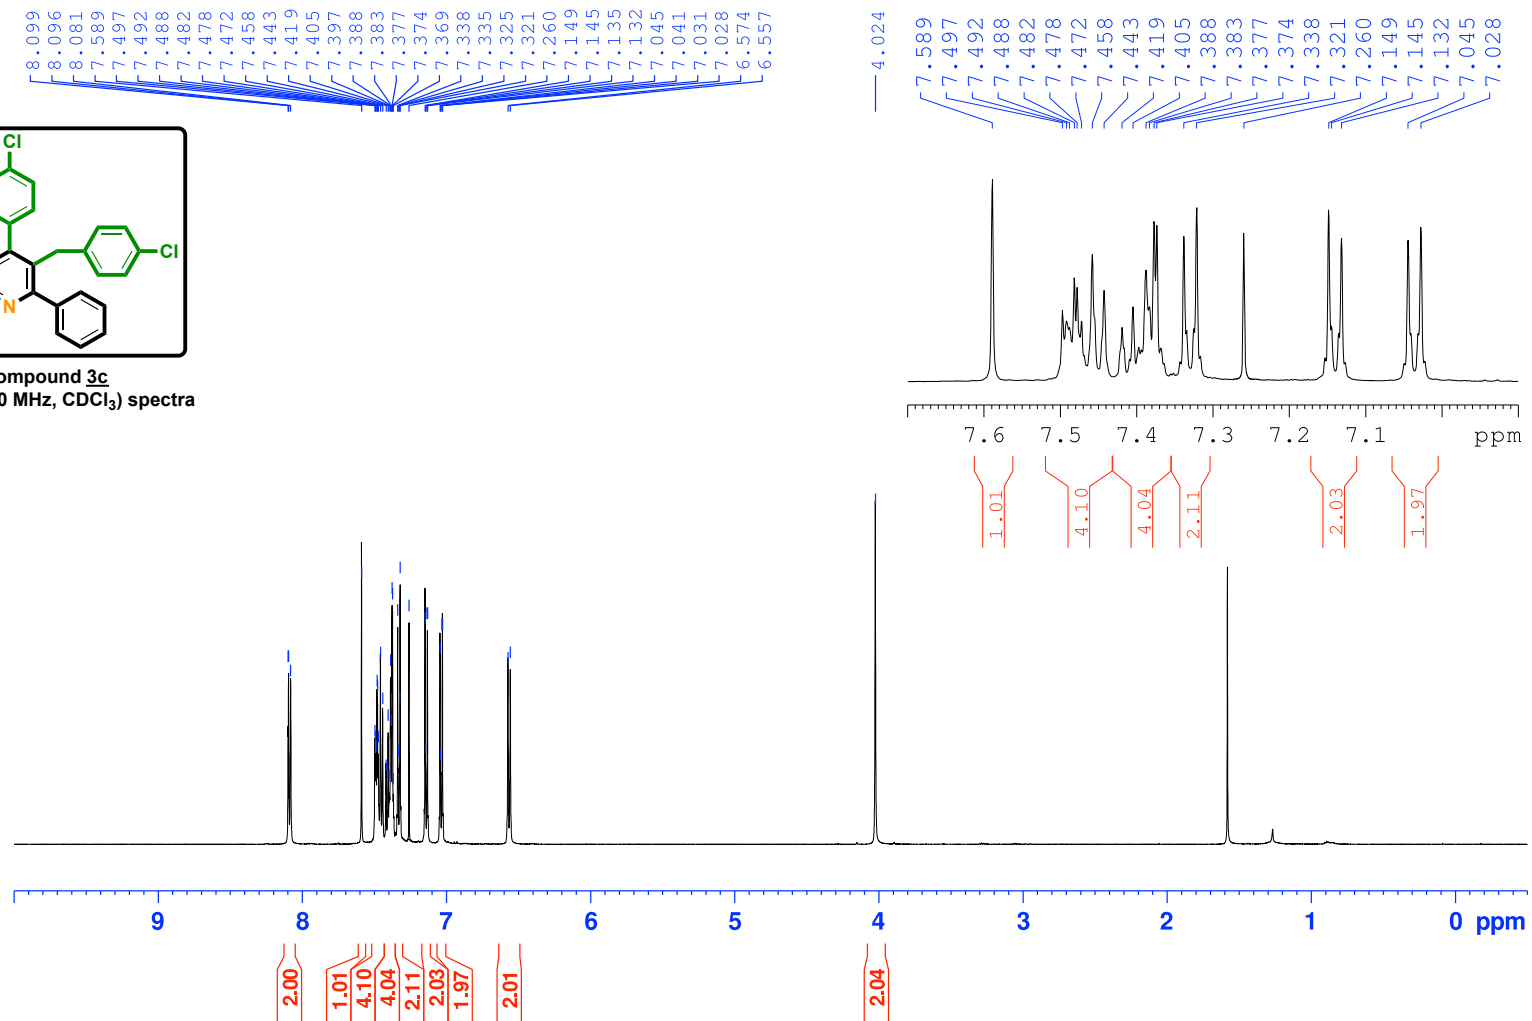



# Compound 3c

13C YHC-438-3 sep 7374 down 1103

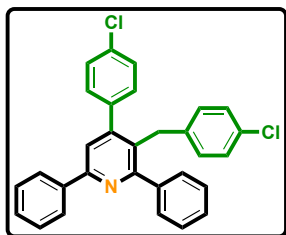

Compound 3c  
<sup>13</sup>C NMR (125 MHz, CDCl<sub>3</sub>) spectra

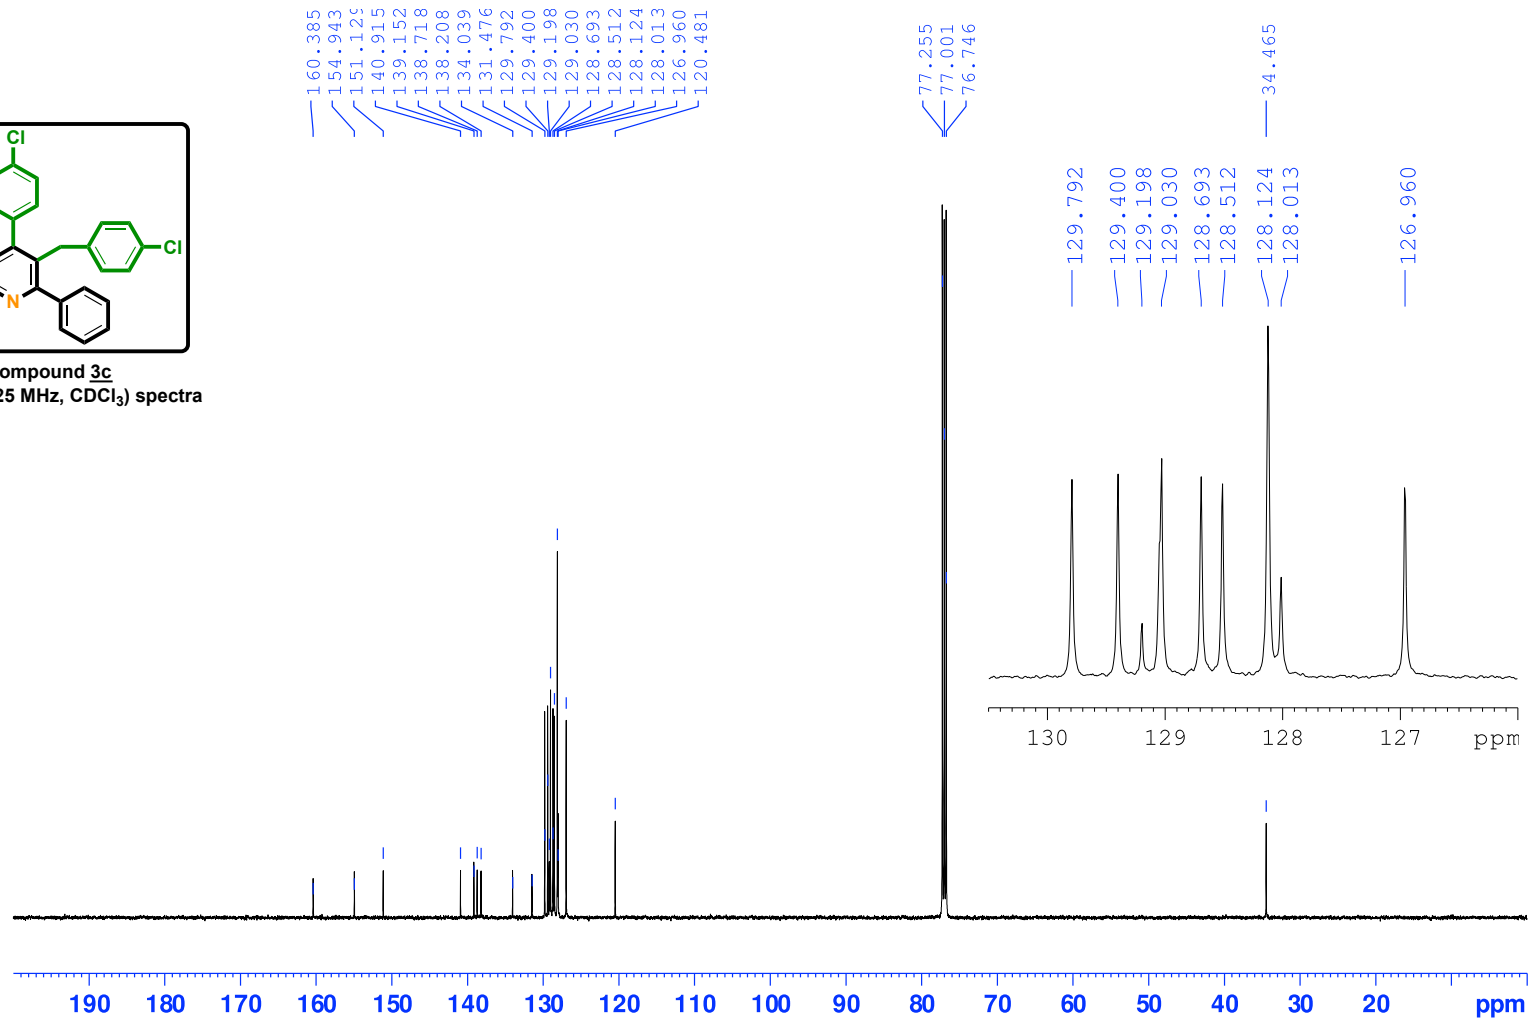

# Compound 2d

1H YHC-439 sep 29-31 top 0708

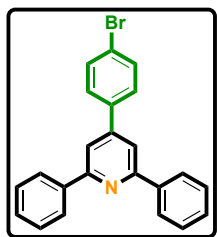

Compound 2d  
<sup>1</sup>H NMR (500 MHz, CDCl<sub>3</sub>) spectra

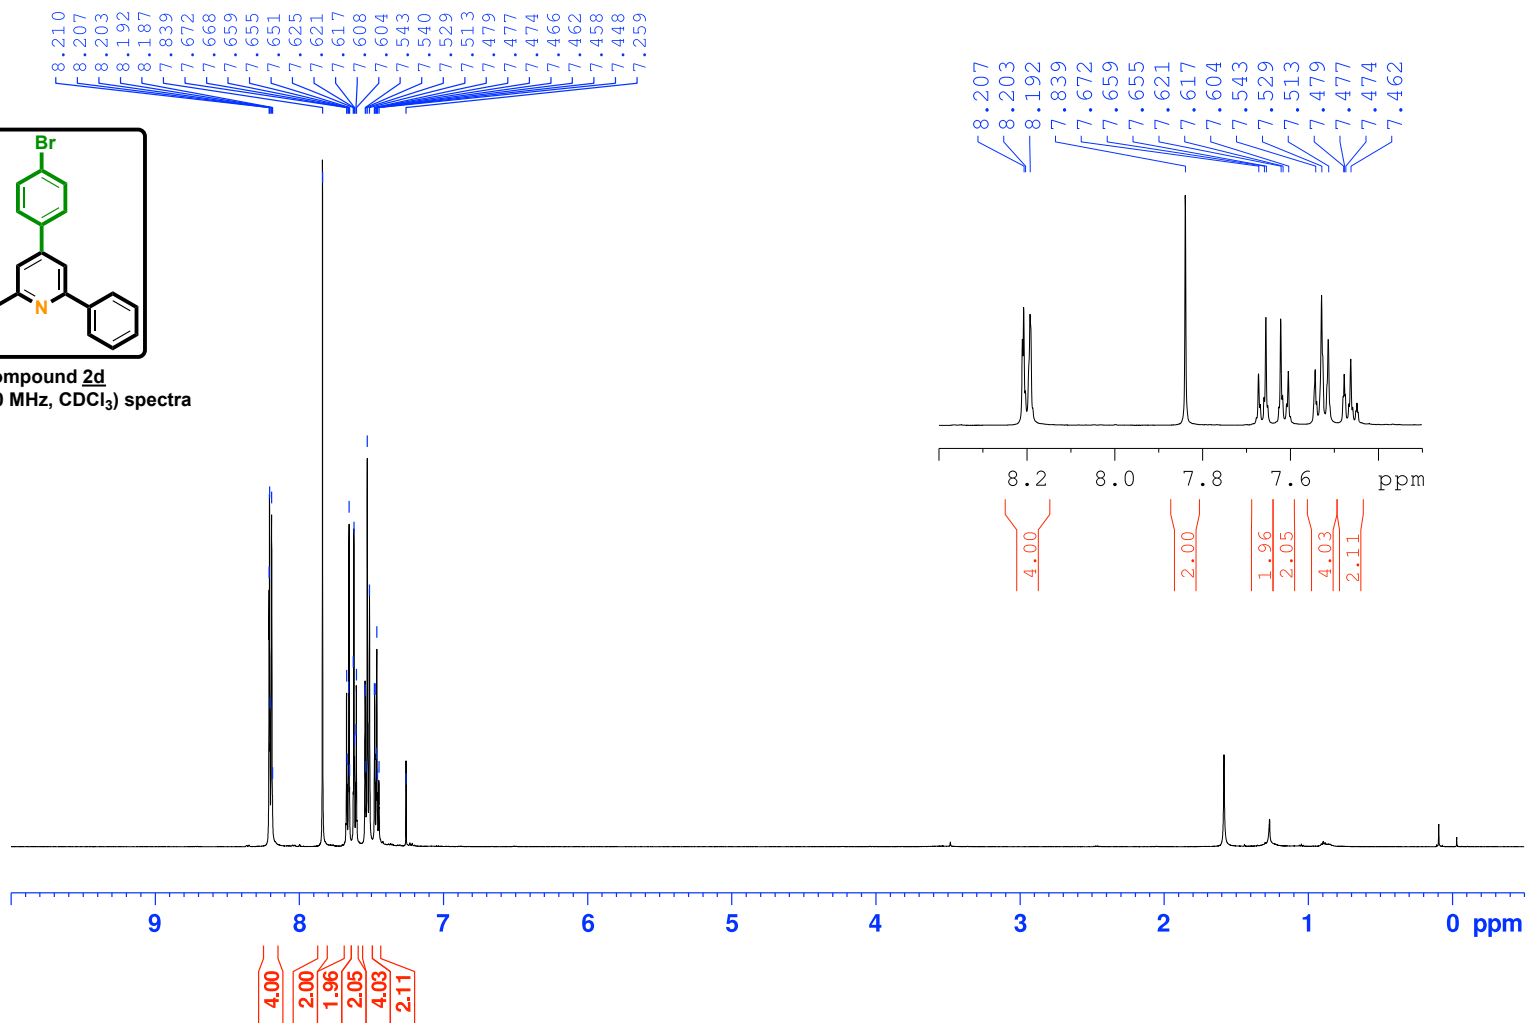

# Compound 2d

13C YHC-439 sep 29-31 top 0708

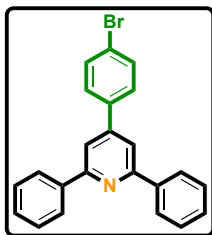

Compound 2d  
<sup>13</sup>C NMR (125 MHz, CDCl<sub>3</sub>) spectra

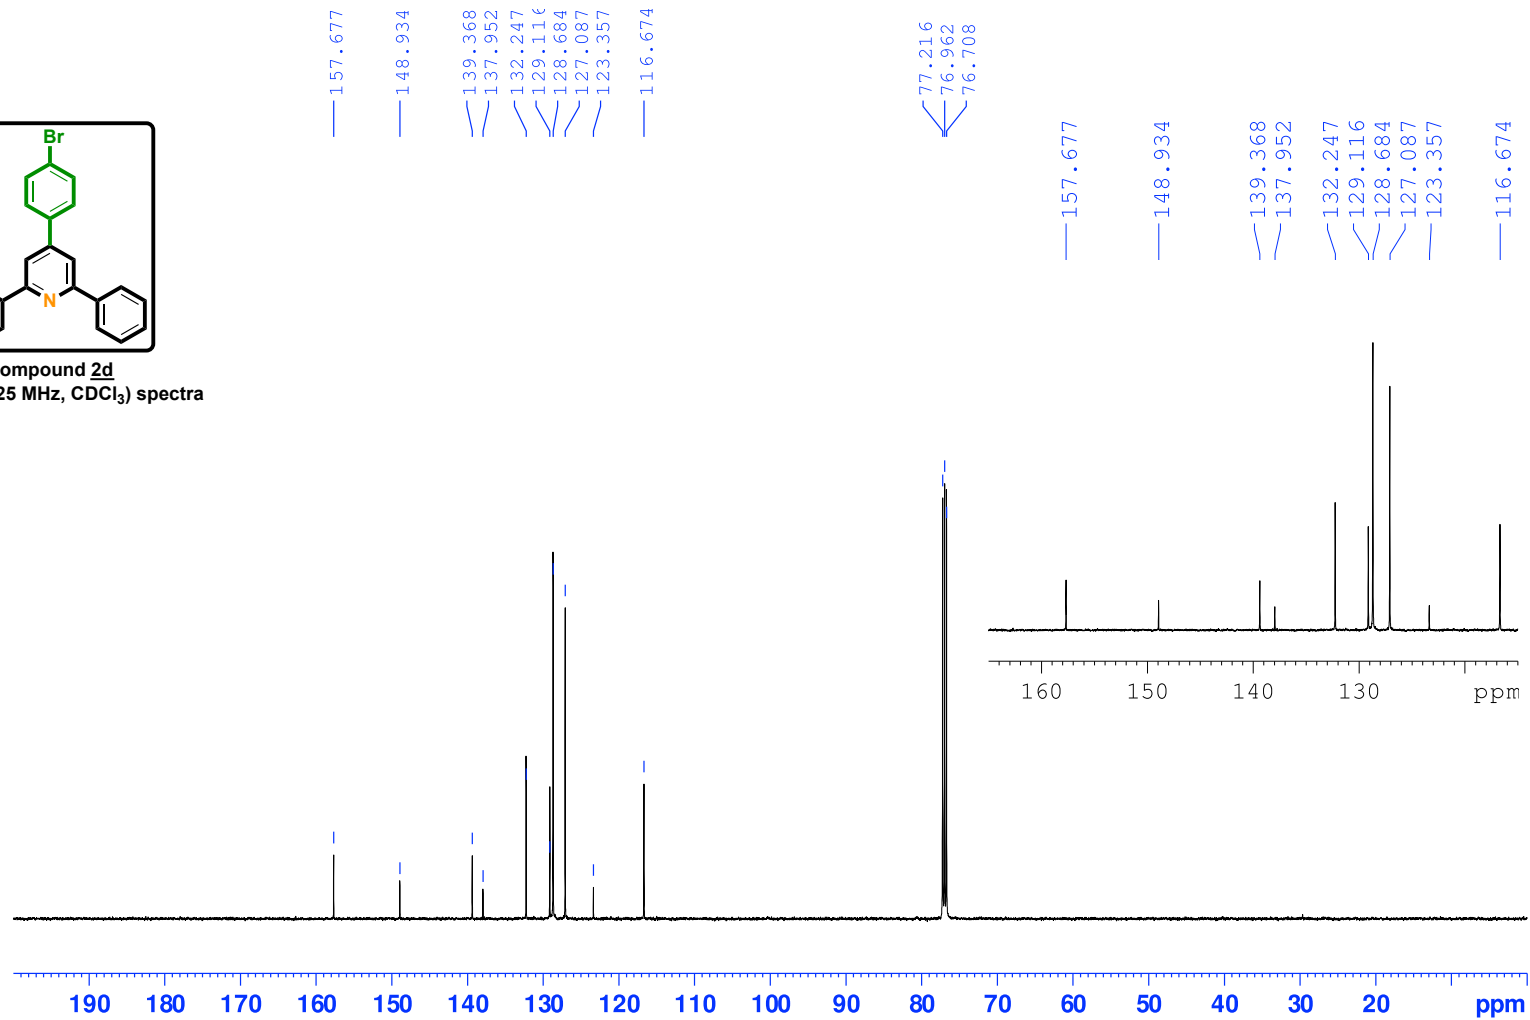

# Compound 3d

1H YHC-439 sep 48-50 down 0708

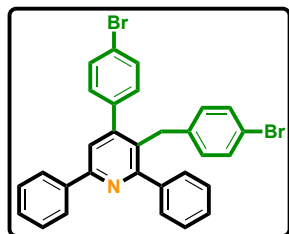

Compound 3d  
<sup>1</sup>H NMR (500 MHz, CDCl<sub>3</sub>) spectra

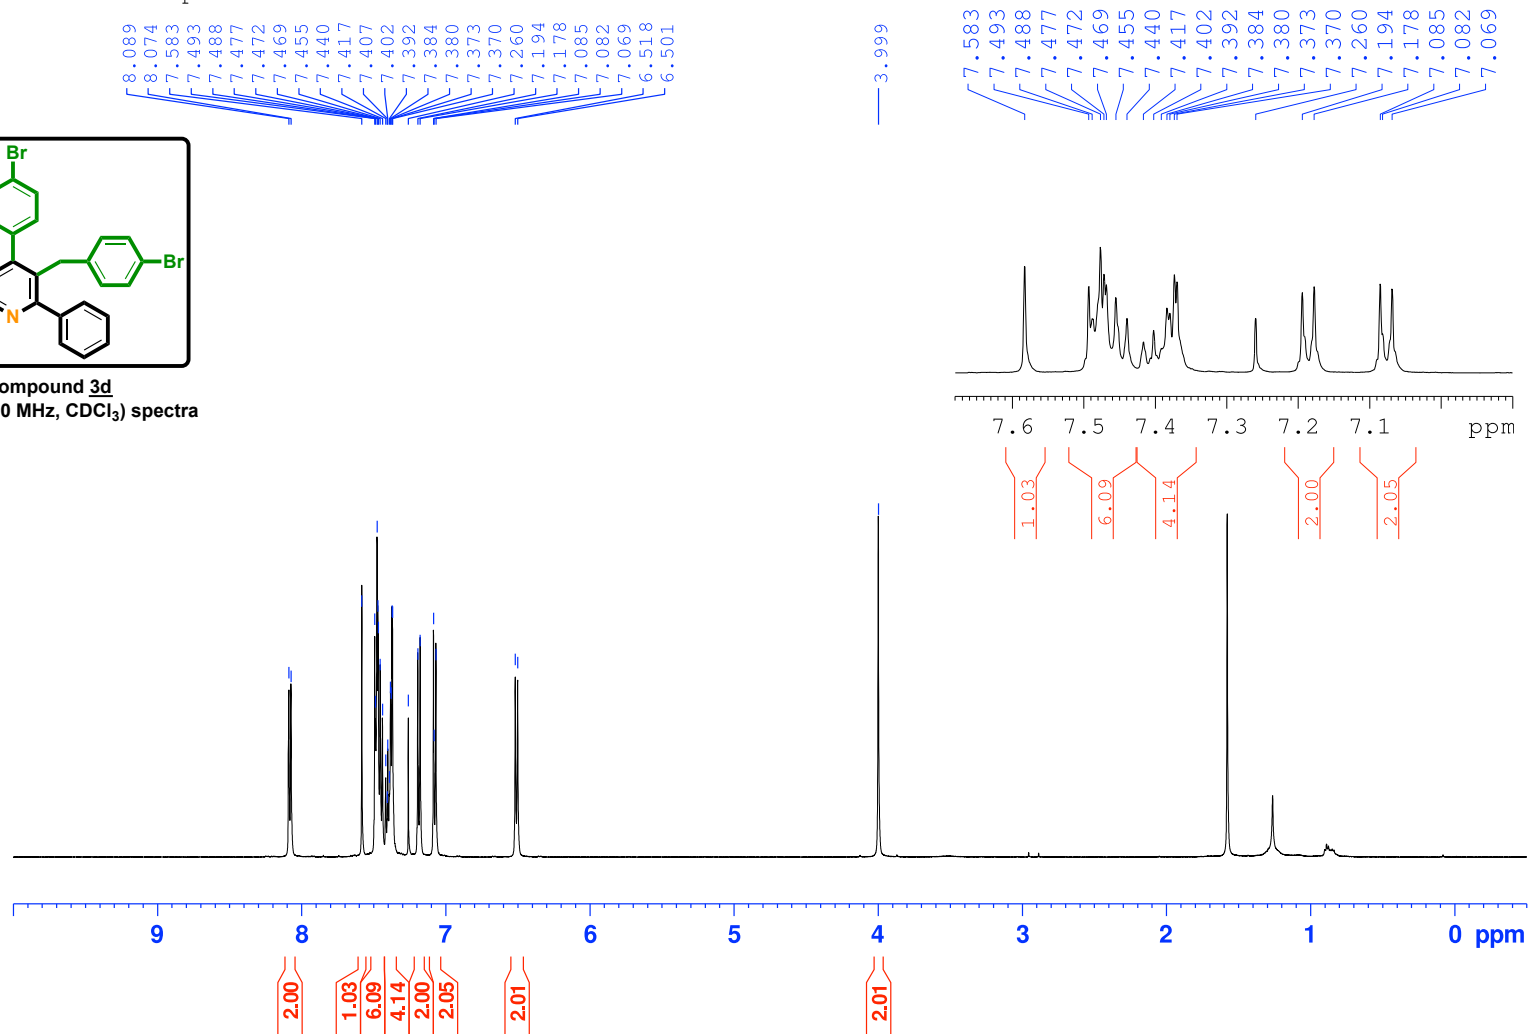

# Compound 3d

13C YHC-439 sep 48-50 down 0708

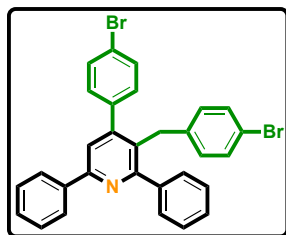

Compound 3d  
<sup>13</sup>C NMR (125 MHz, CDCl<sub>3</sub>) spectra

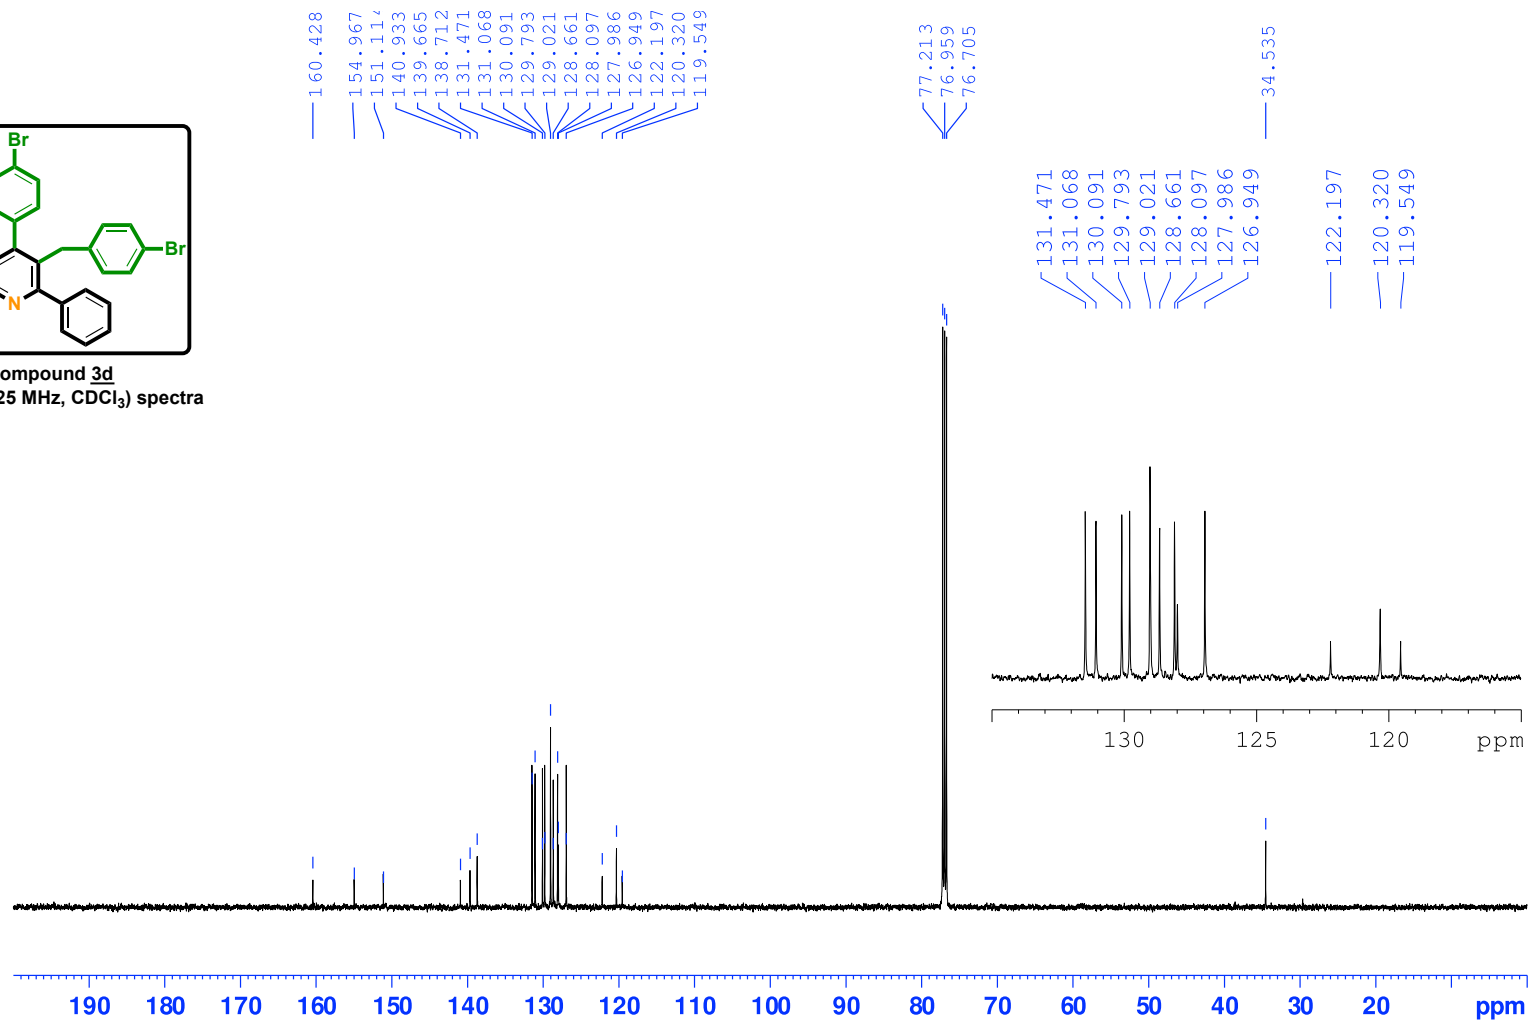

# Compound 2e

1H YHC-053 sep43-44 0119

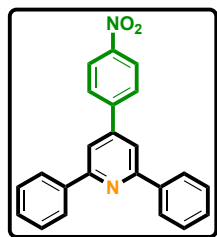

Compound 2e  
<sup>1</sup>H NMR (500 MHz, CDCl<sub>3</sub>) spectra

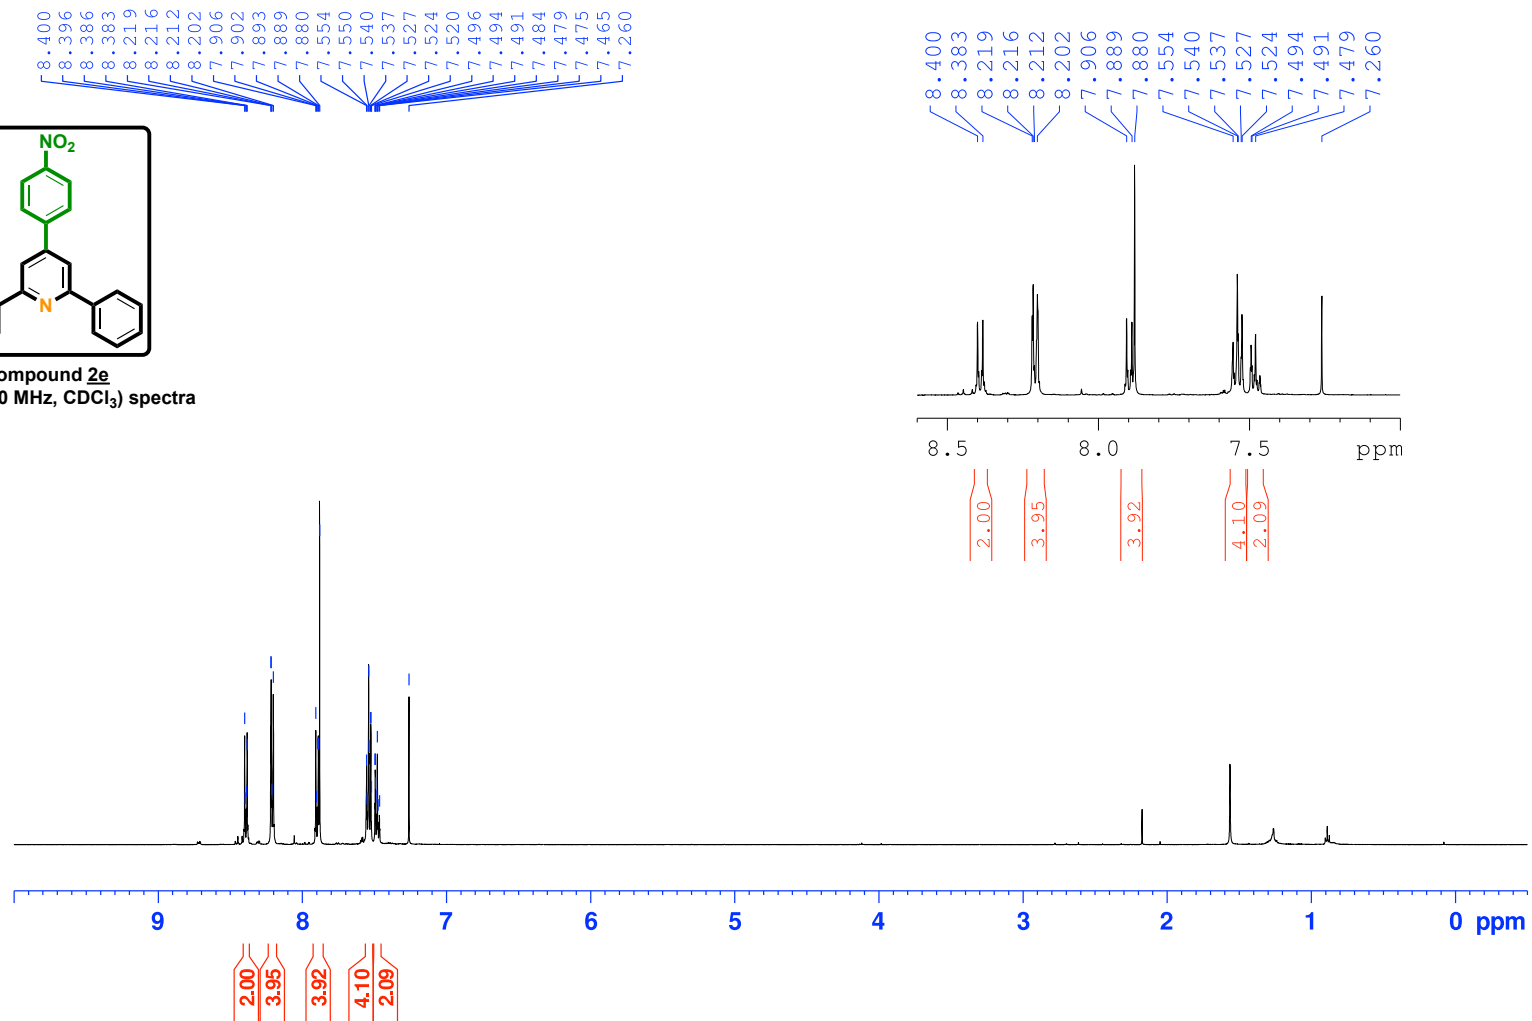

# Compound 2e

13C YHC-053 sep43-44 0119

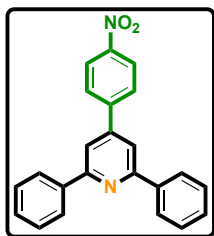

Compound 2e  
<sup>13</sup>C NMR (125 MHz, CDCl<sub>3</sub>) spectra

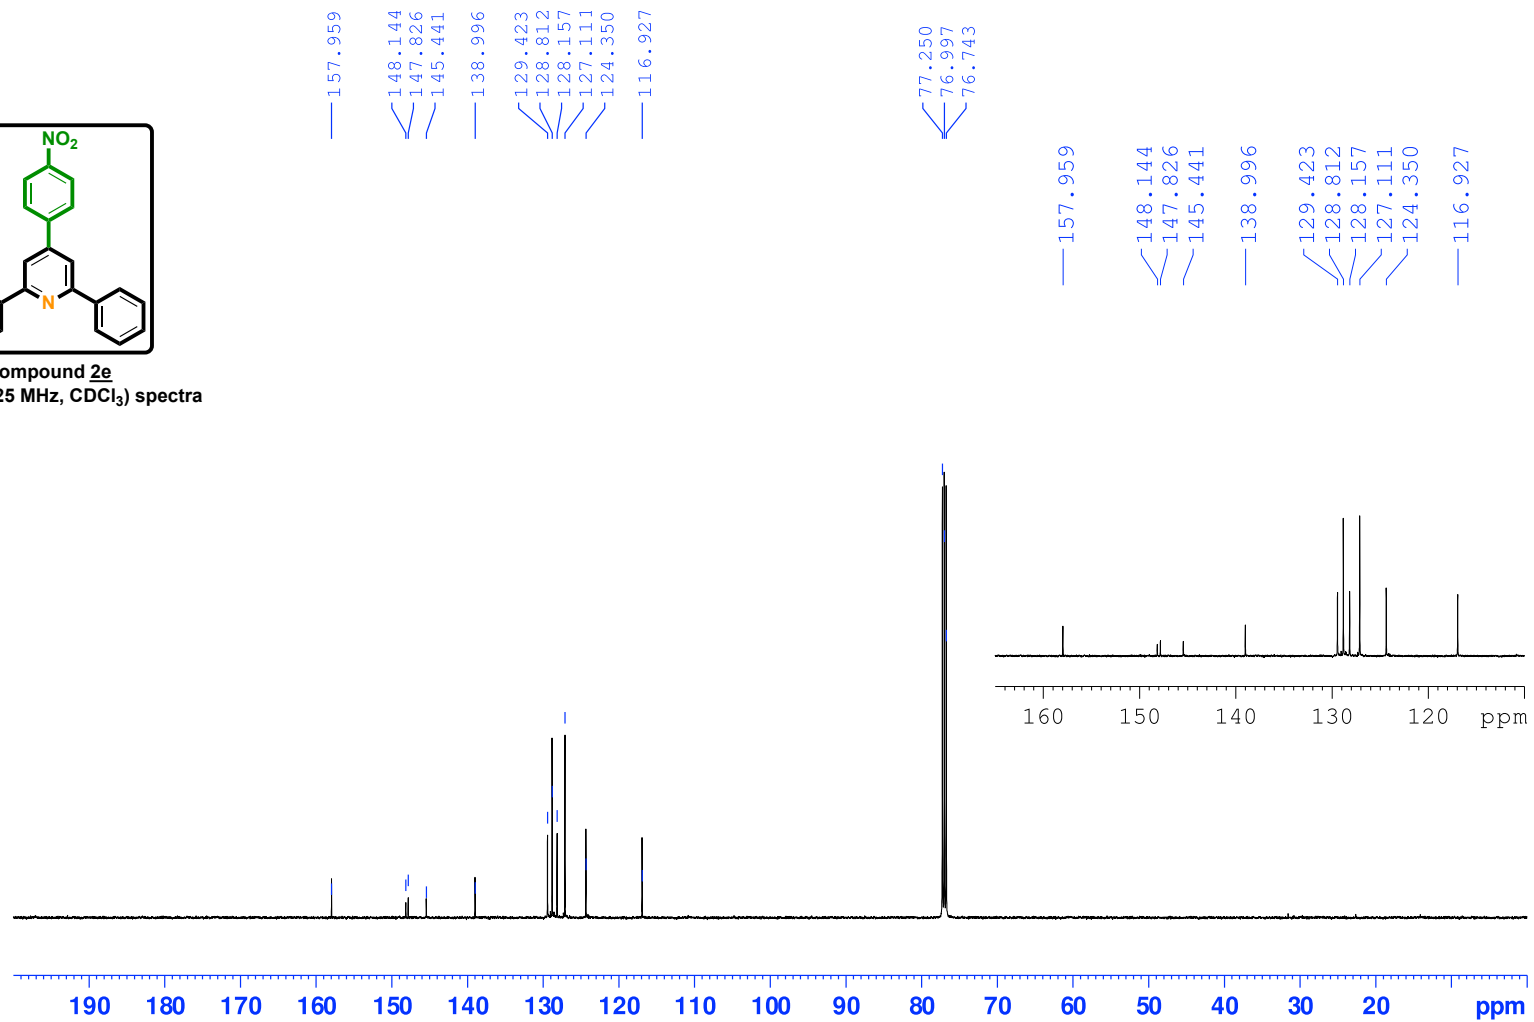

# Compound 3e

1H YHC-440 sep 8788 down 0823

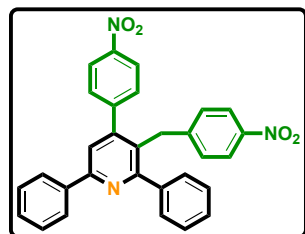

Compound 3e  
<sup>1</sup>H NMR (500 MHz, CDCl<sub>3</sub>) spectra

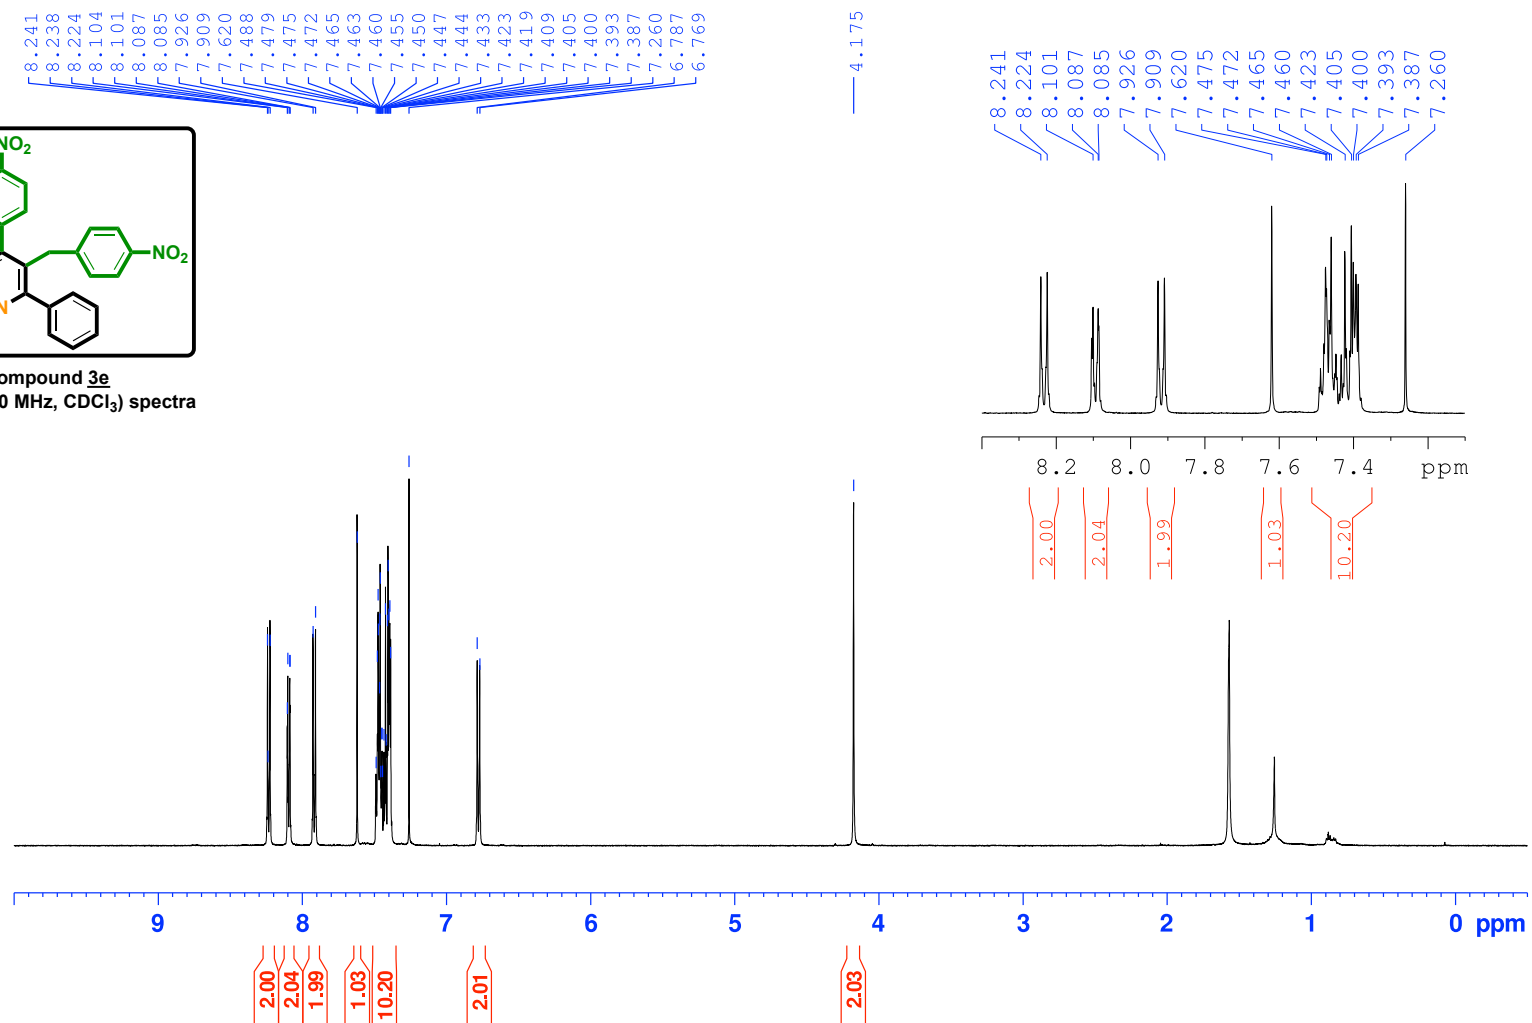



# Compound 3e

13C YHC-440 sep 8788 down 0823

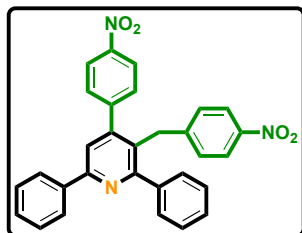

Compound 3e  
<sup>13</sup>C NMR (125 MHz, CDCl<sub>3</sub>) spectra

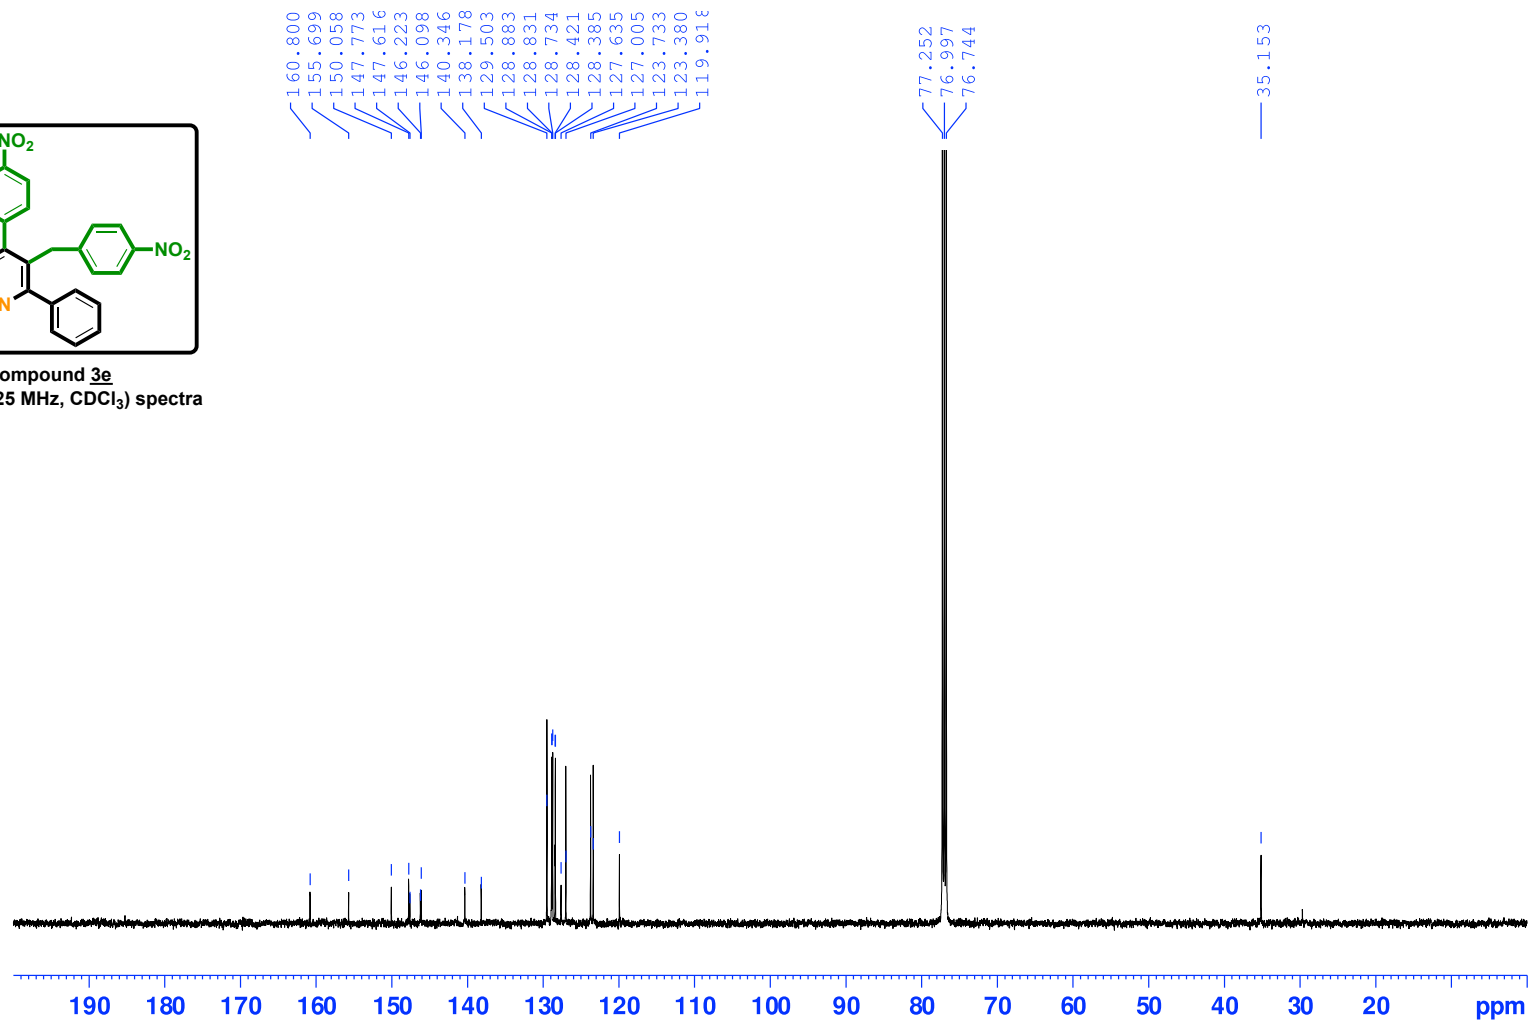

# Compound 2f

1H YHC-433 sep 2930 up 0618

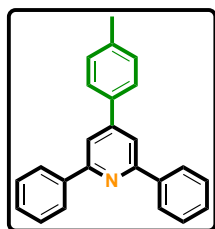

Compound 2f

<sup>1</sup>H NMR (500 MHz, CDCl<sub>3</sub>) spectra

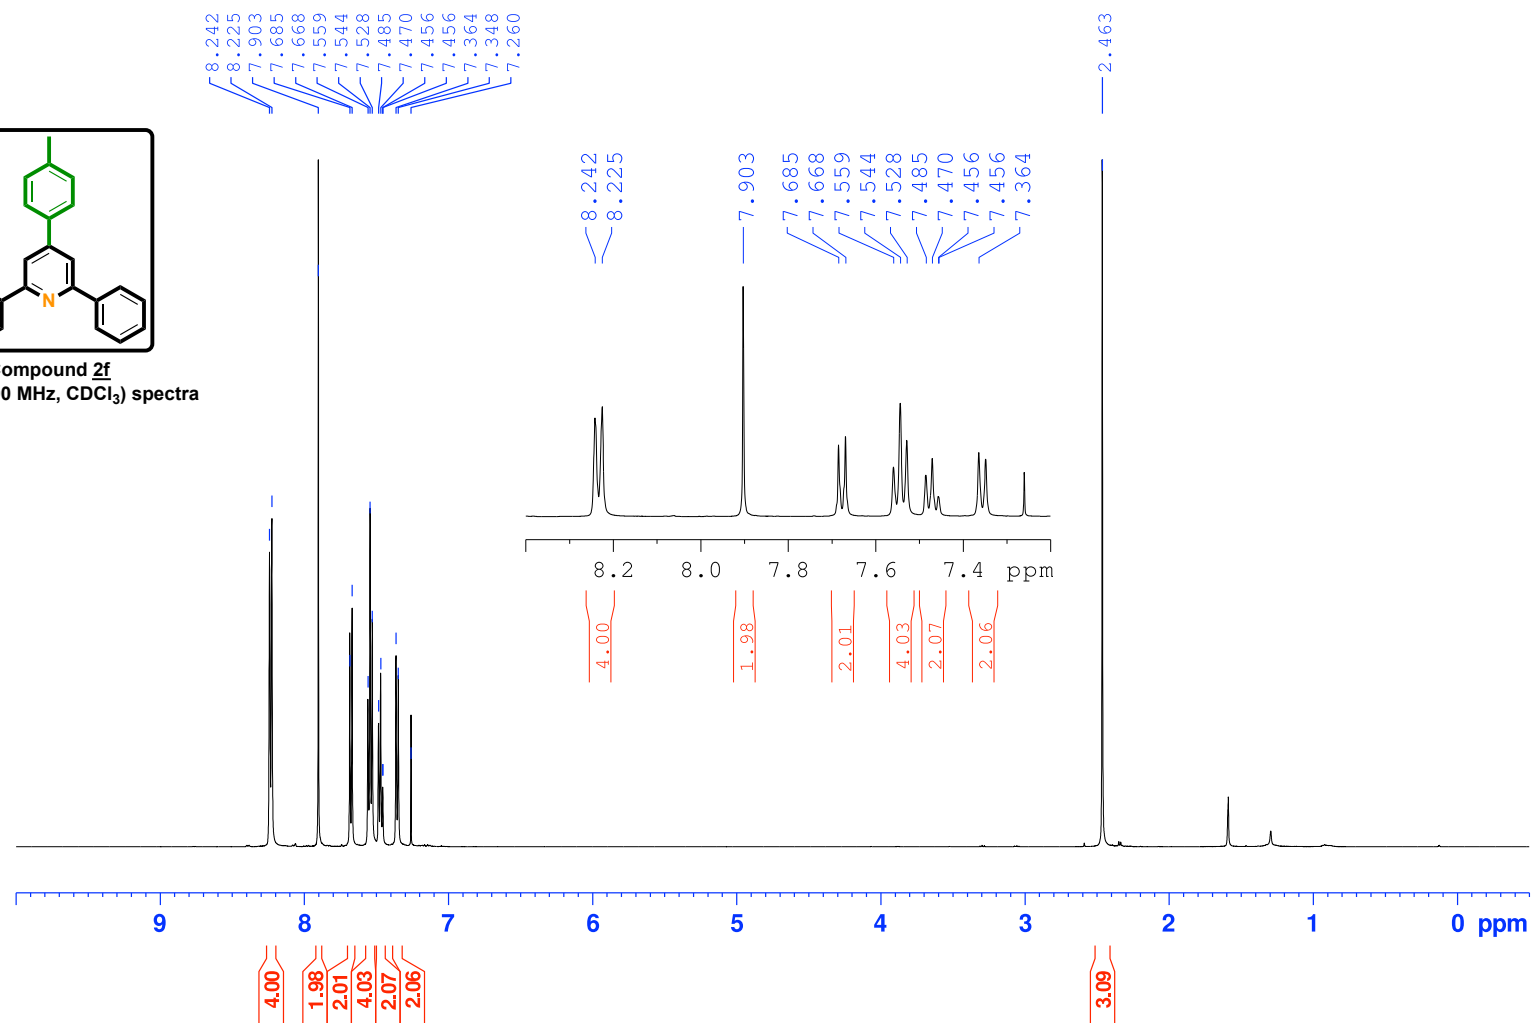

# Compound 2f

13C YHC-433 sep 2930 up 0618

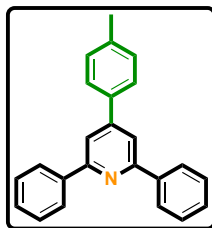

Compound **2f**

<sup>13</sup>C NMR (125 MHz, CDCl<sub>3</sub>) spectra

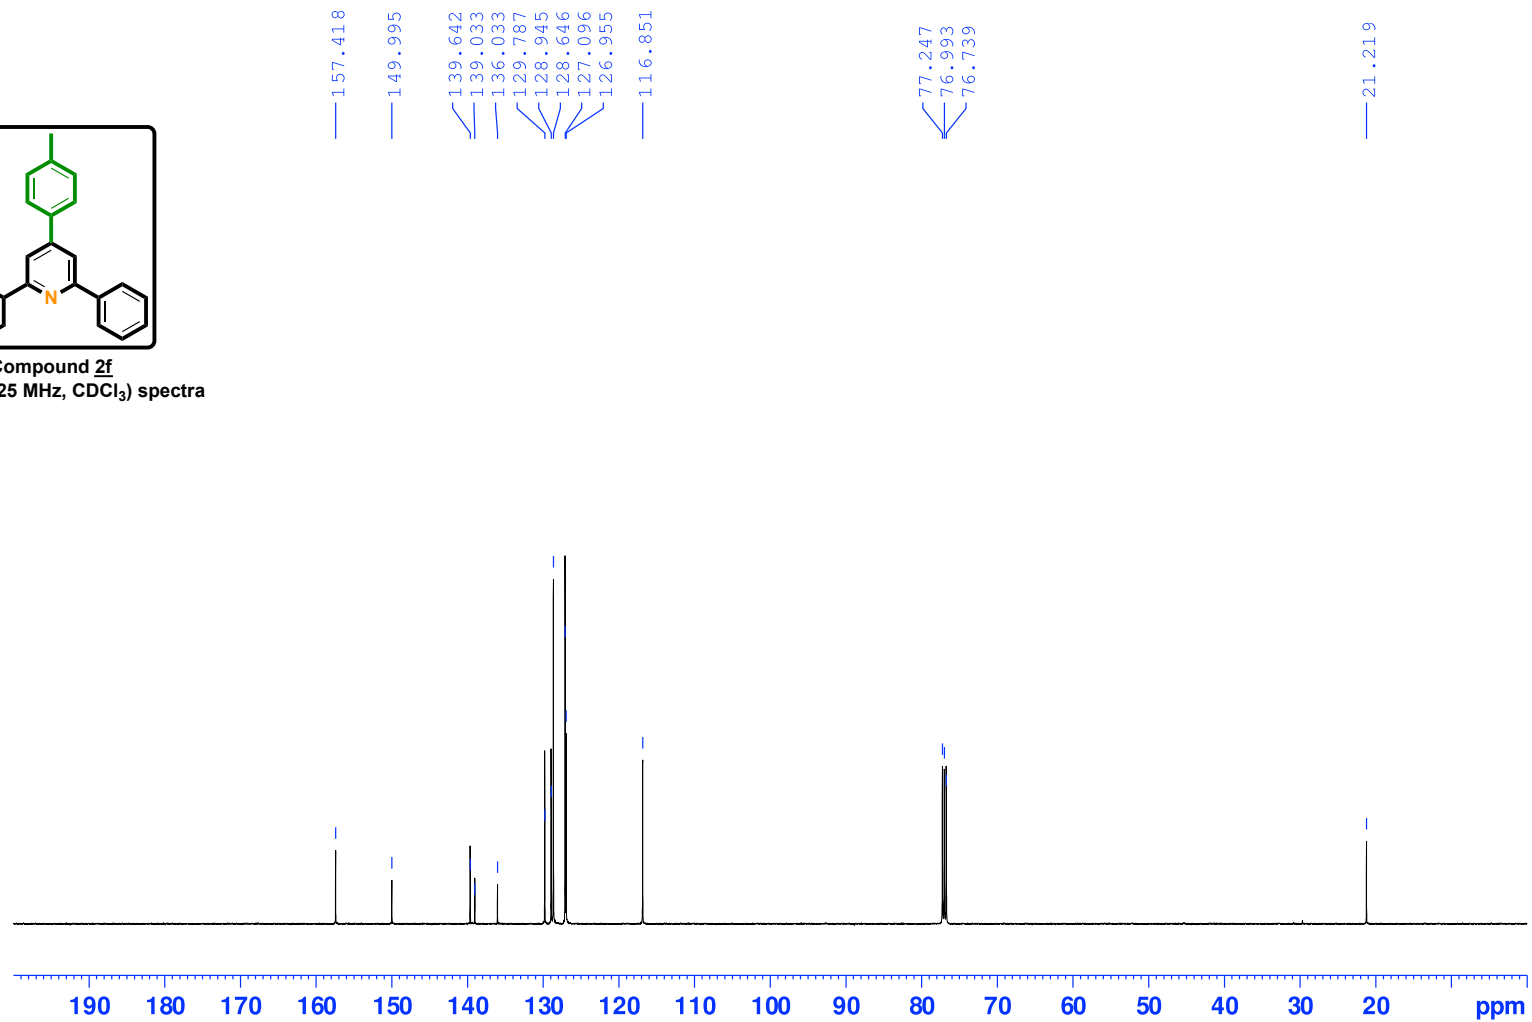

# Compound 3f

1H YHC-433 sep 4142 down 0618

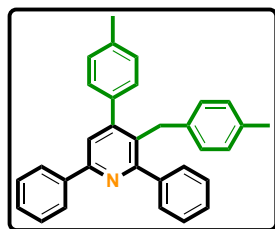

Compound 3f  
<sup>1</sup>H NMR (500 MHz, CDCl<sub>3</sub>) spectra

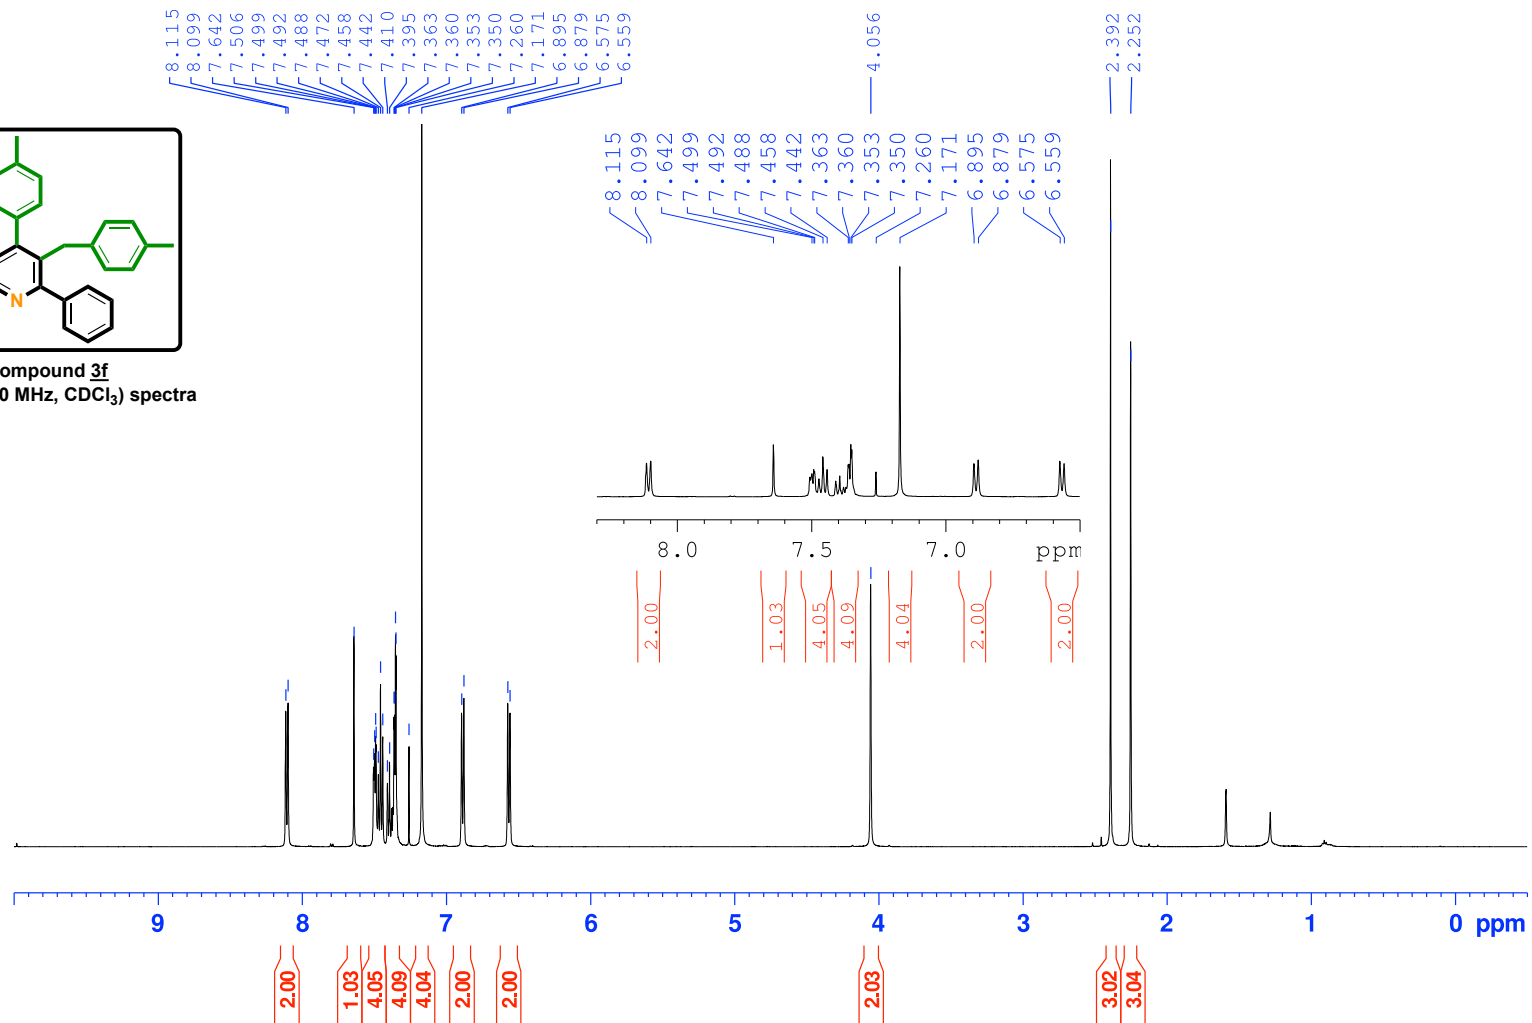

# Compound 3f

13C YHC-433 sep 4142 down 0618

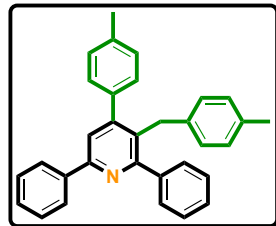

Compound 3f  
<sup>13</sup>C NMR (125 MHz, CDCl<sub>3</sub>) spectra

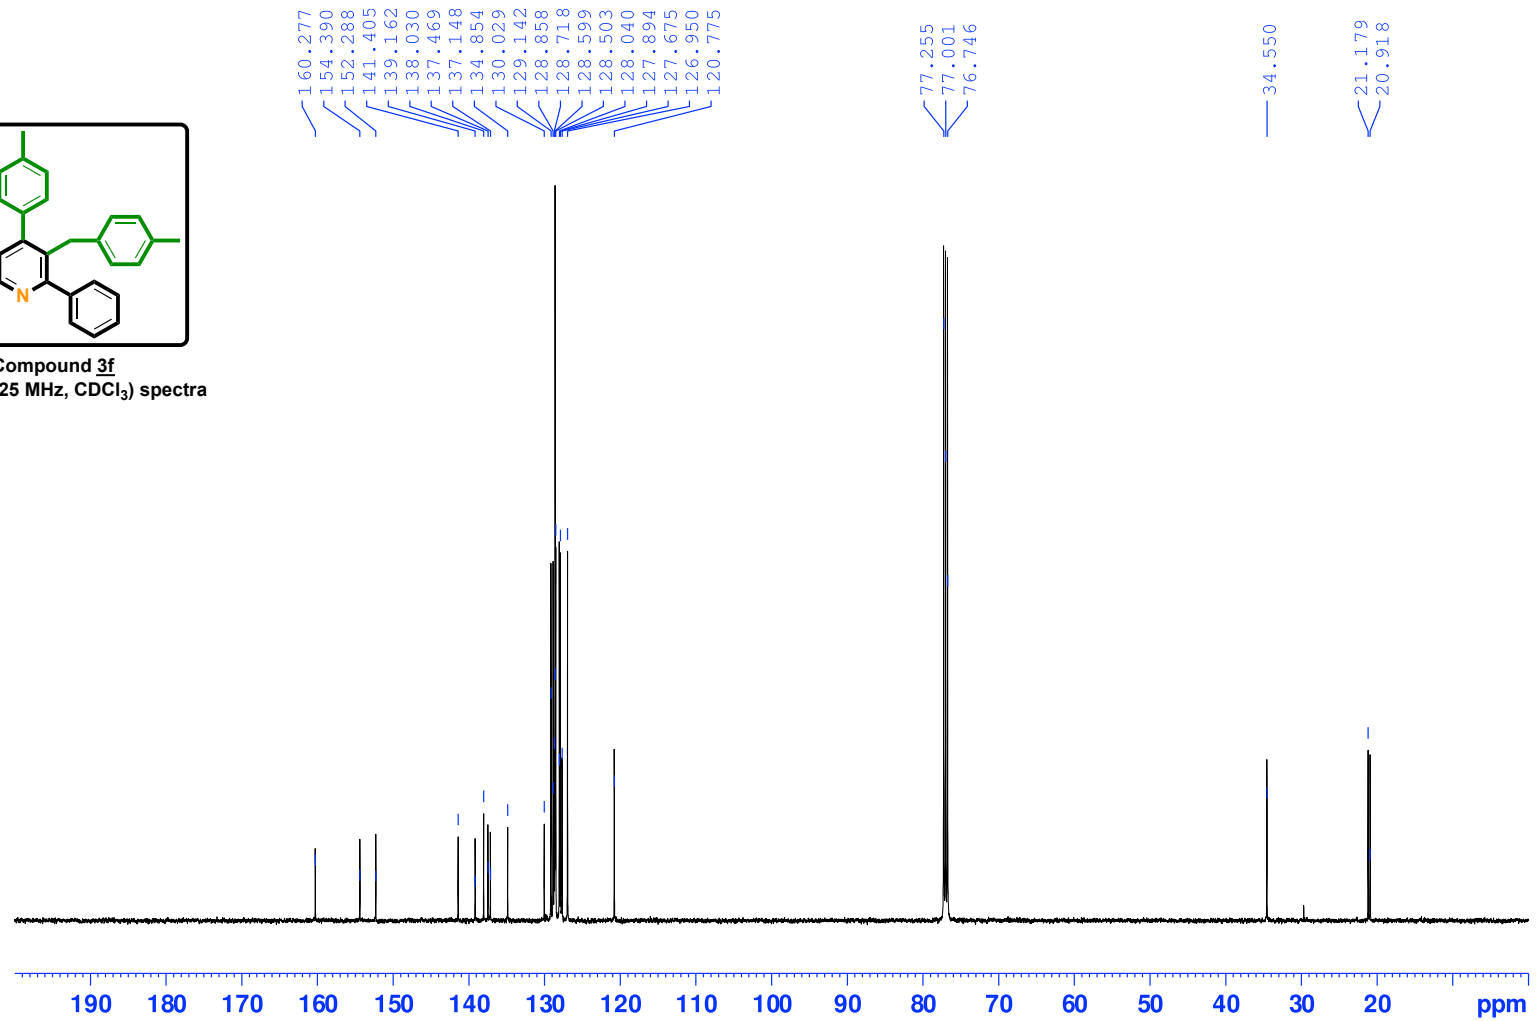

# Compound 2g

1H YHC-431 sep 5455 0517

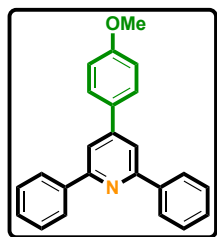

Compound 2g  
<sup>1</sup>H NMR (500 MHz, CDCl<sub>3</sub>) spectra

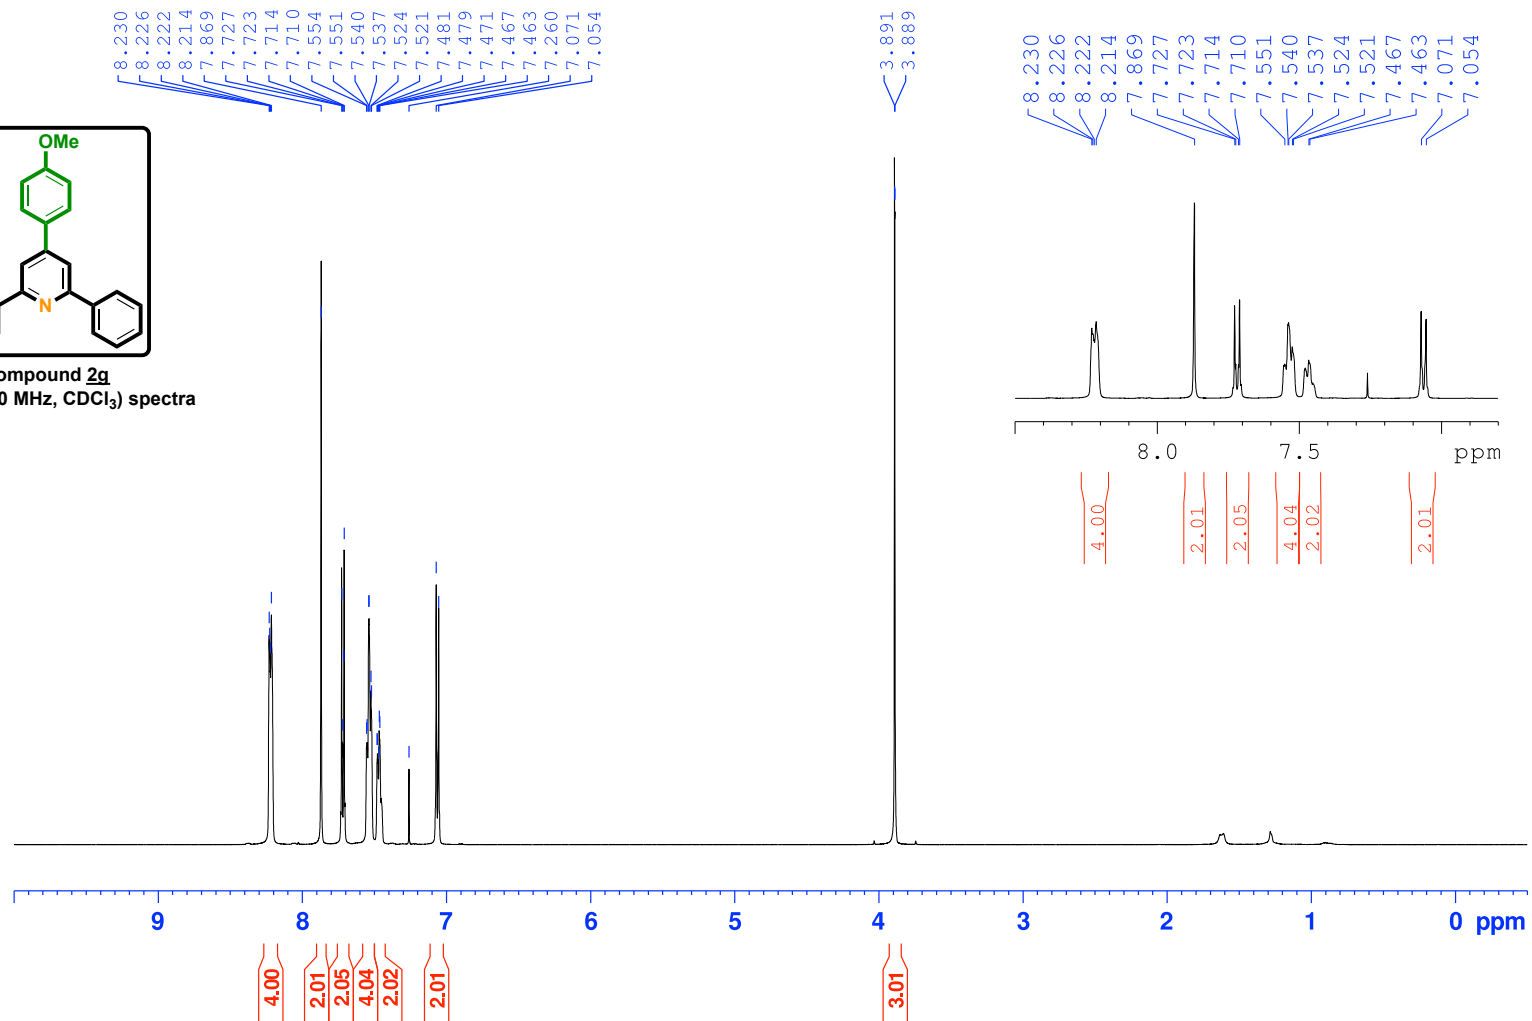

# Compound 2g

13C YHC-431 sep 5455 0517

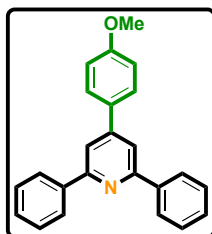

Compound 2g  
<sup>13</sup>C NMR (125 MHz, CDCl<sub>3</sub>) spectra

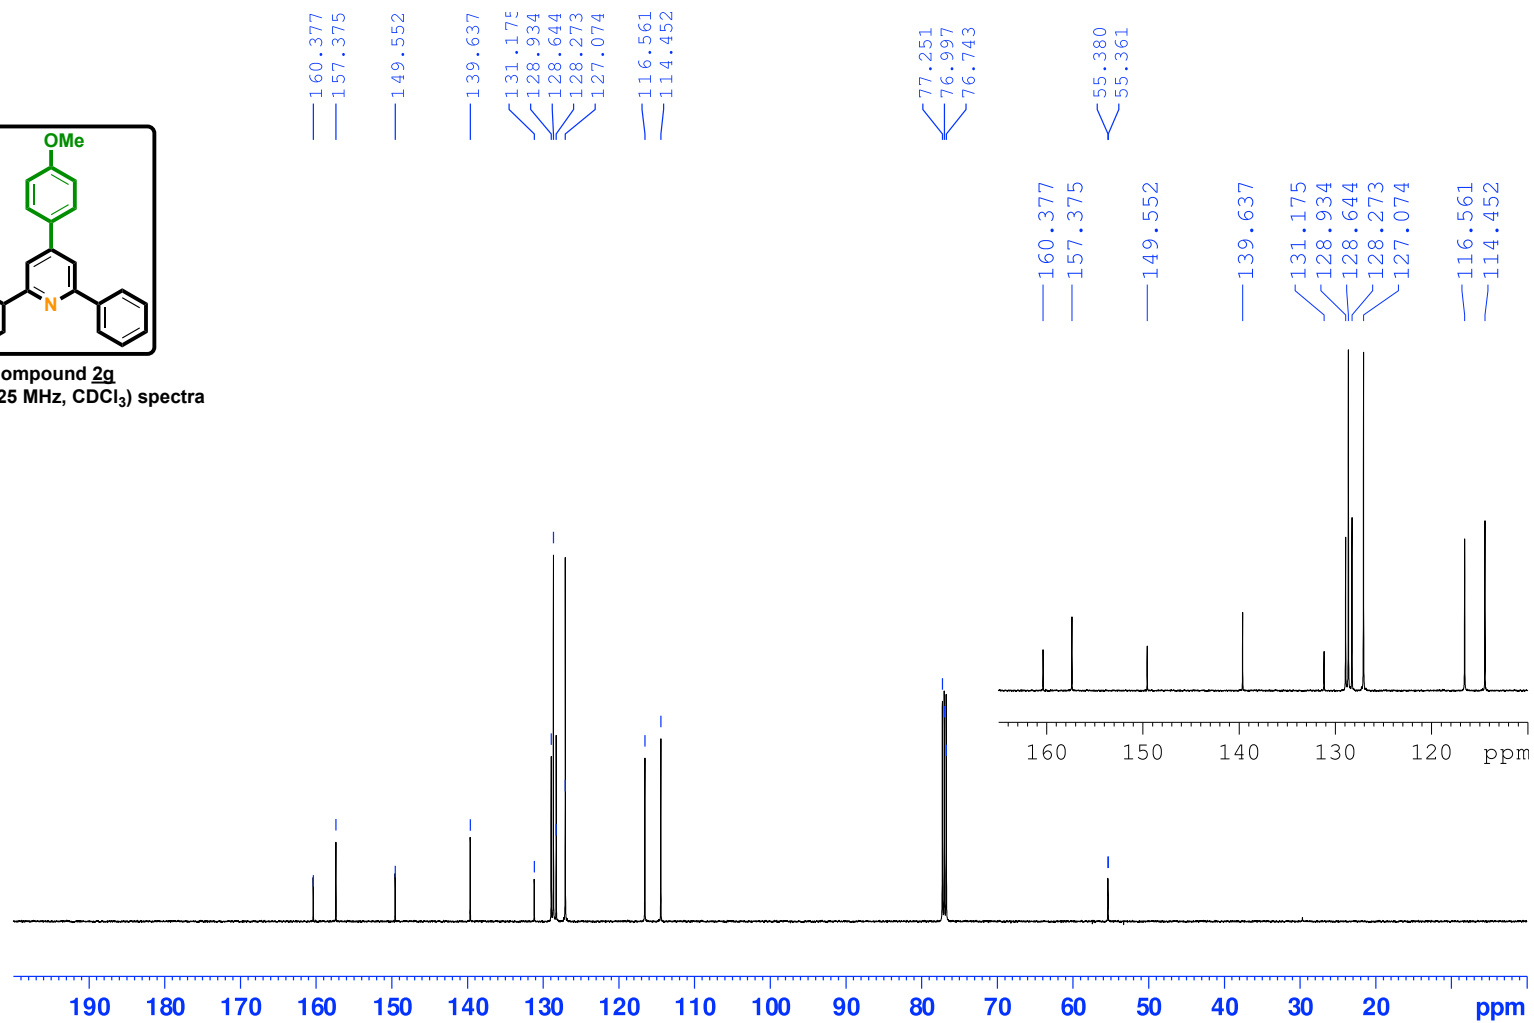

# Compound 3g

1H YHC-431 sep 9899 0517

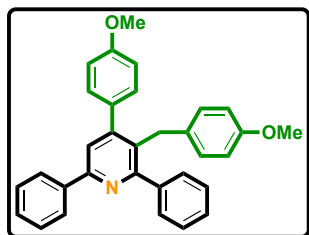

Compound 3g  
<sup>1</sup>H NMR (500 MHz, CDCl<sub>3</sub>) spectra

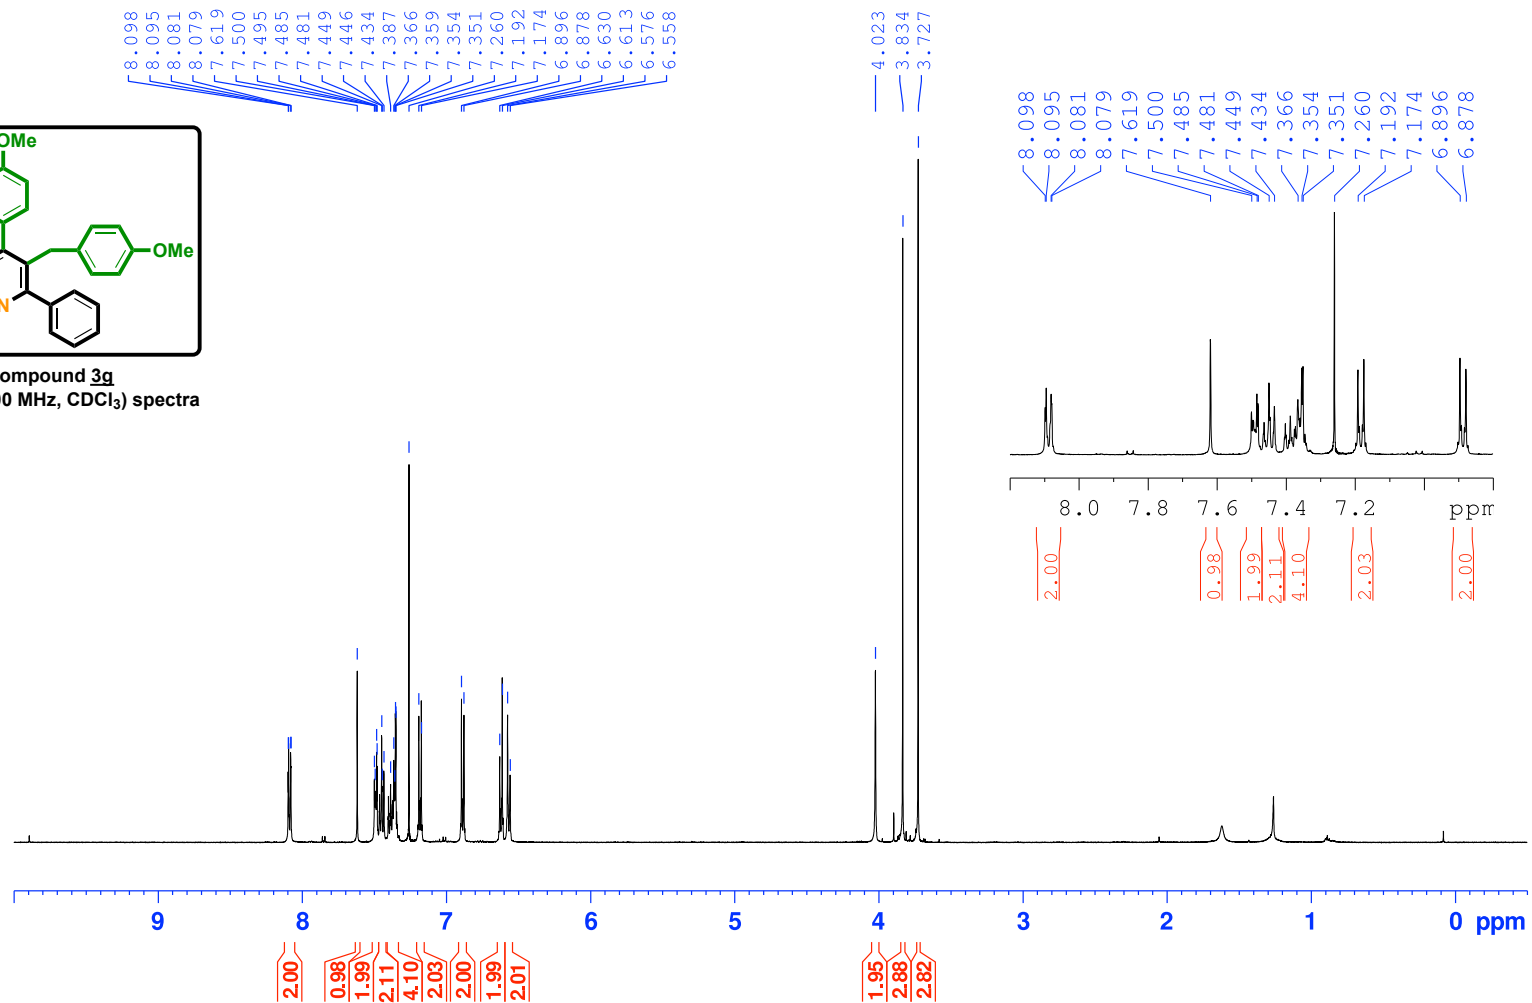



# Compound 3g

13C YHC-431 sep 9899 0517

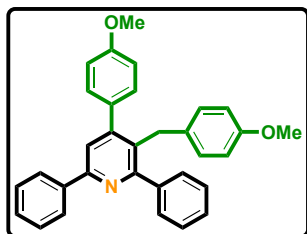

Compound 3g  
<sup>13</sup>C NMR (125 MHz, CDCl<sub>3</sub>) spectra

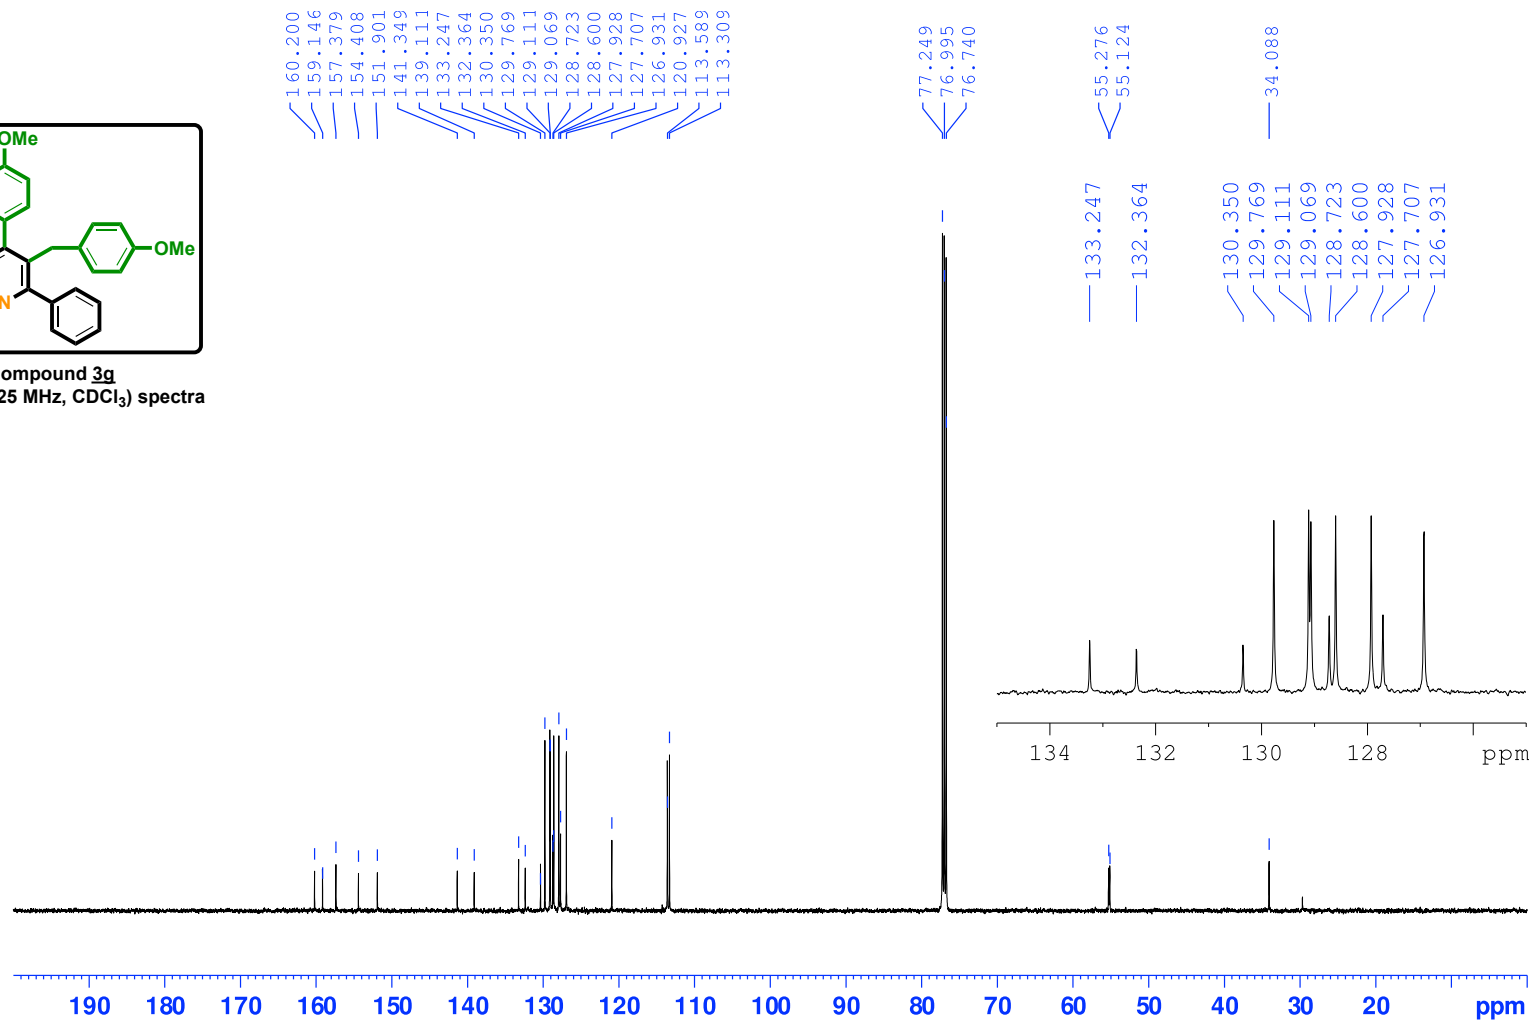

# Compound 2h

1H YHC-434 sep 2526 0624

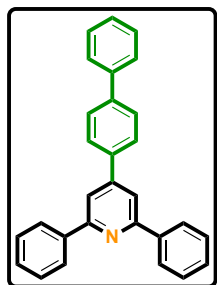

Compound 2h  
<sup>1</sup>H NMR (500 MHz, CDCl<sub>3</sub>) spectra

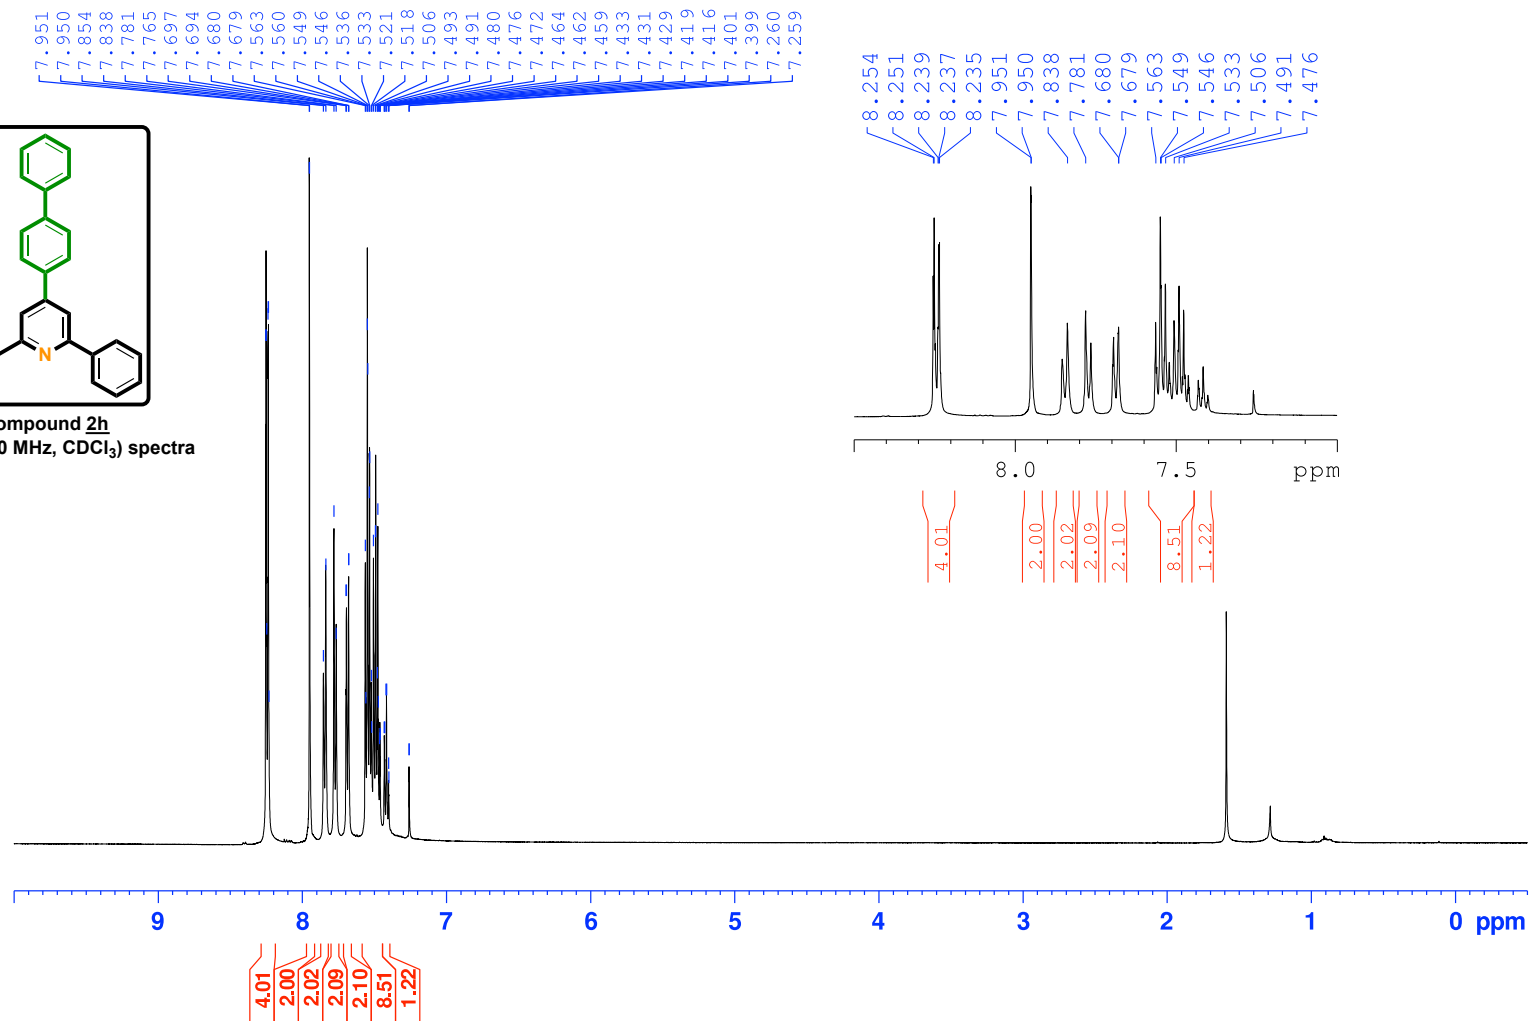

# Compound 2h

13C YHC-434 sep 2526 0624

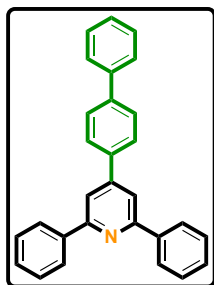

Compound 2h  
<sup>13</sup>C NMR (125 MHz, CDCl<sub>3</sub>) spectra

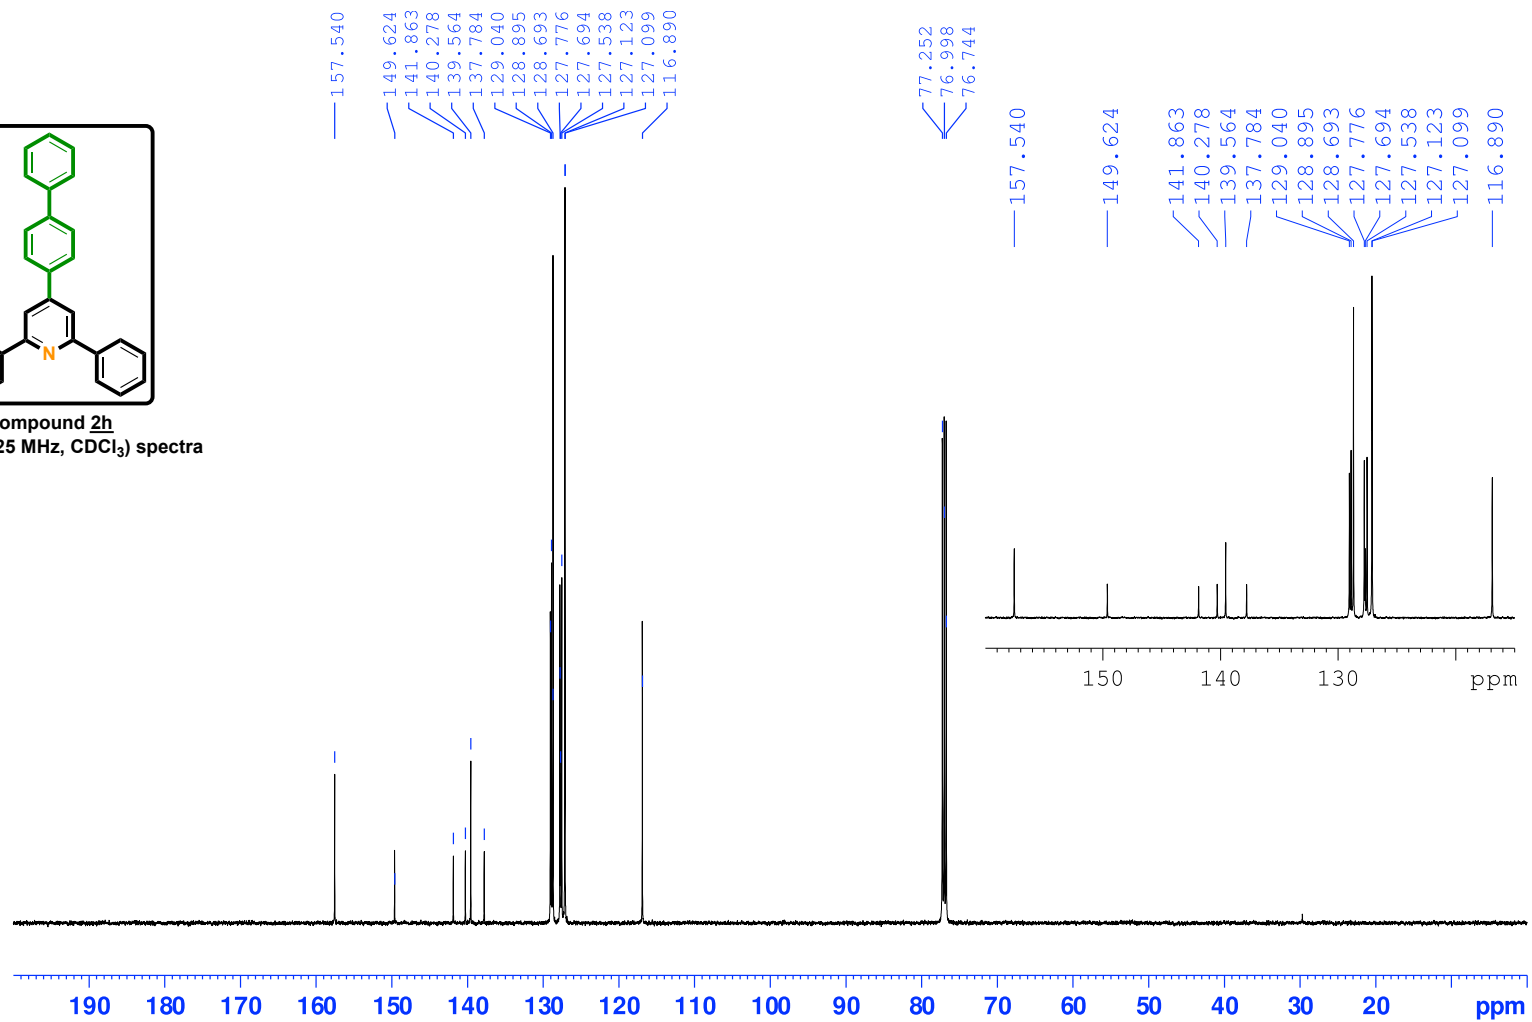

# Compound 3h

1H YHC-434 sep 6667 0624

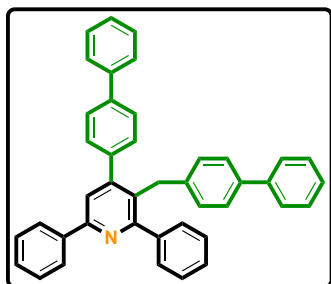

Compound 3h  
<sup>1</sup>H NMR (500 MHz, CDCl<sub>3</sub>) spectra

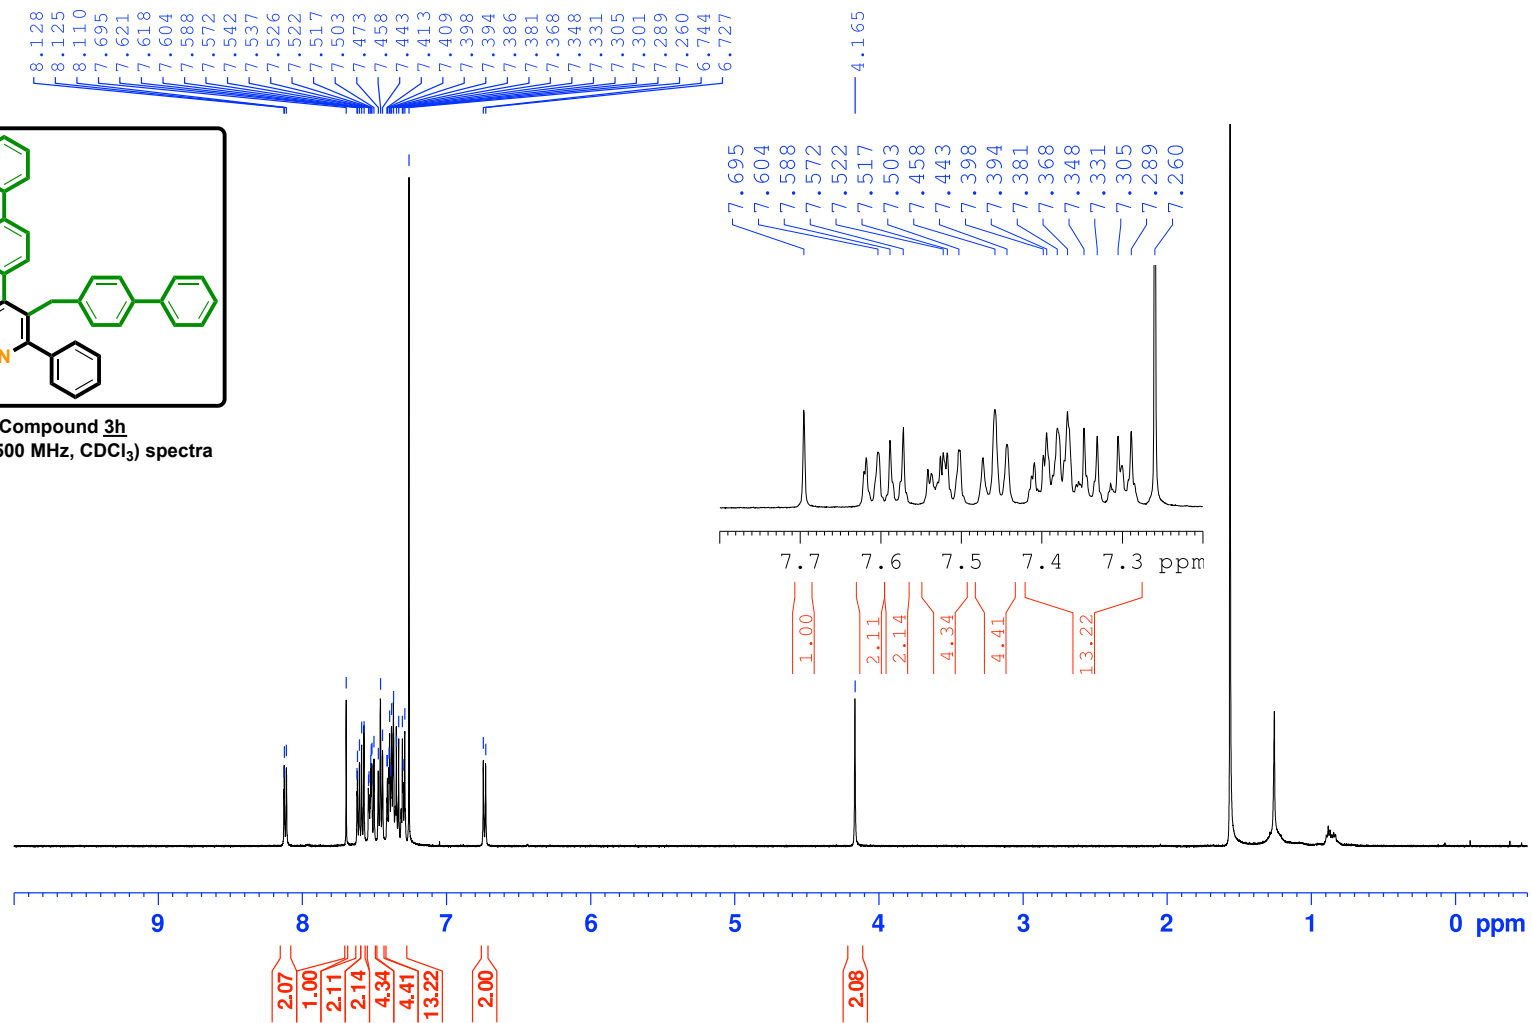

# Compound 3h

13C YHC-434 sep 6667 0624

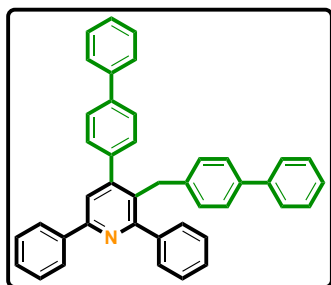

Compound 3h  
<sup>13</sup>C NMR (125 MHz, CDCl<sub>3</sub>) spectra

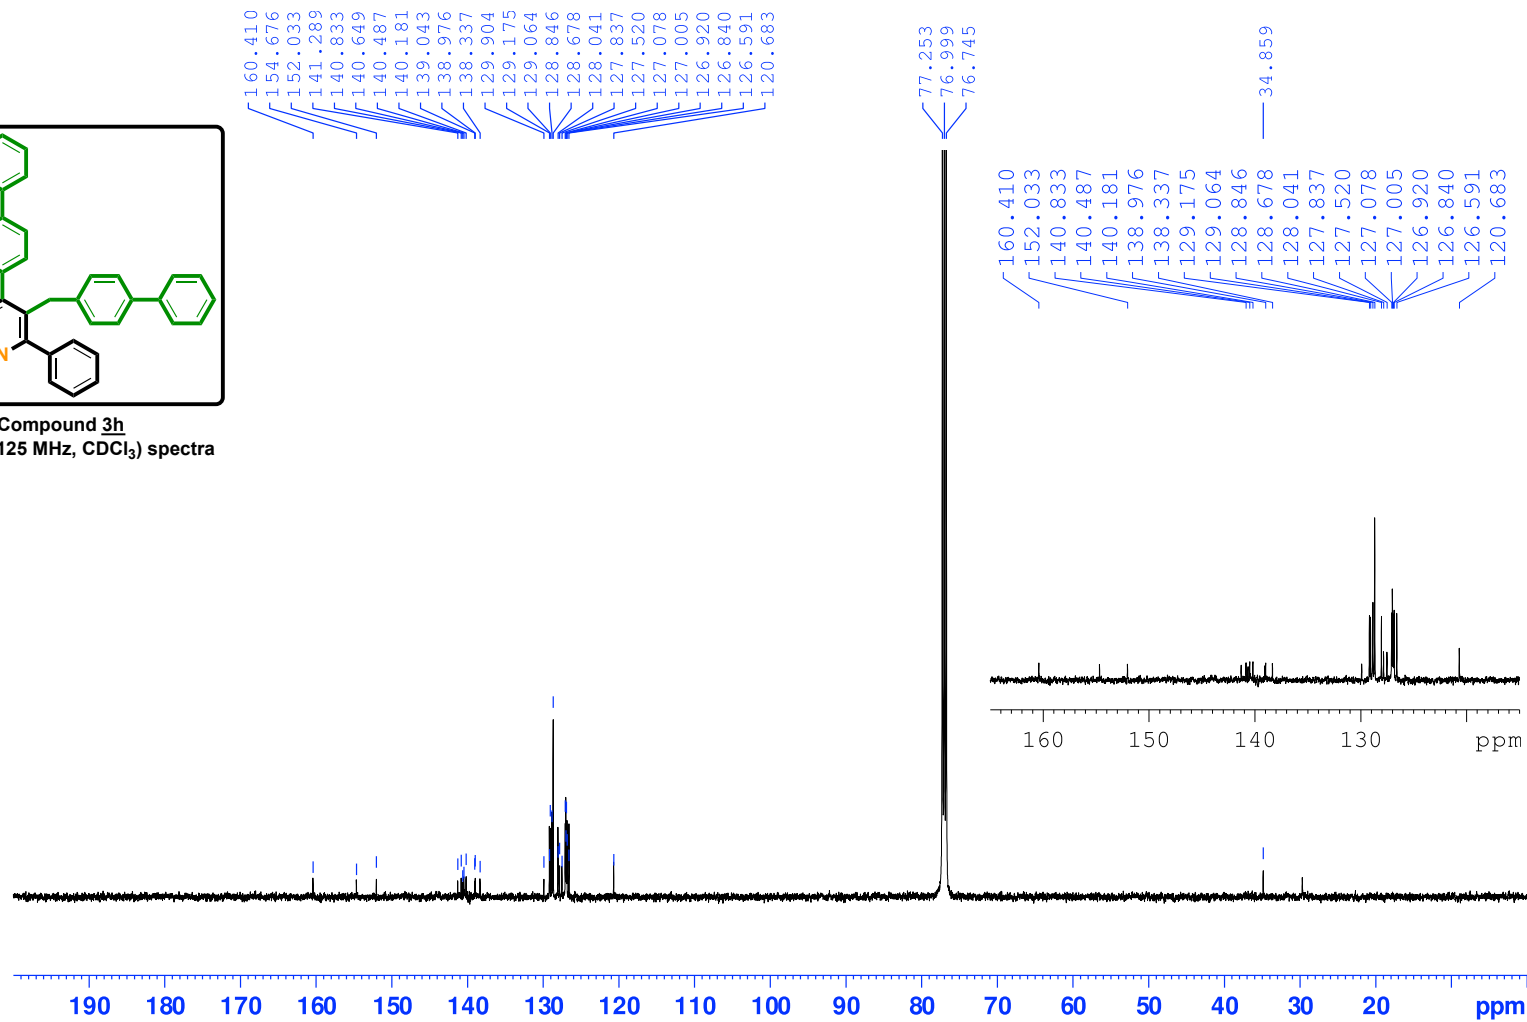

# Compound 2i

1H YHC-435 sep 18-20 top 0625

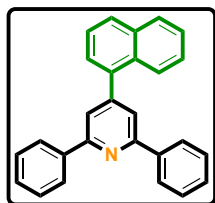

Compound 2i  
<sup>1</sup>H NMR (500 MHz, CDCl<sub>3</sub>) spectra

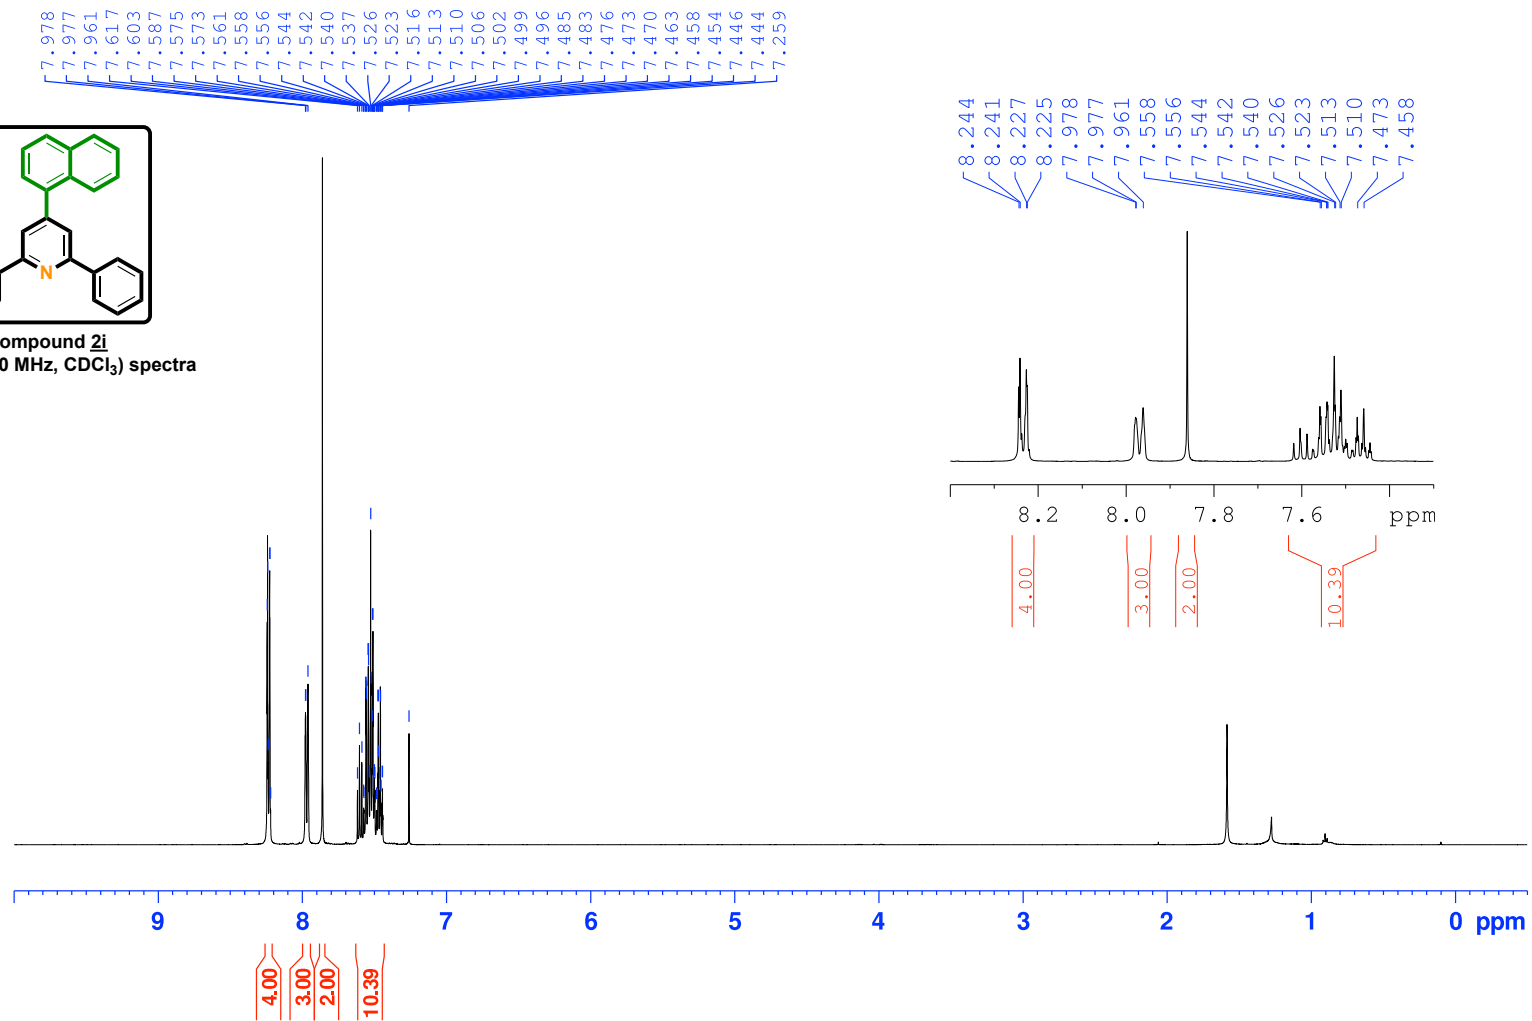

# Compound 2i

13C YHC-435 sep 18-20 top 0625

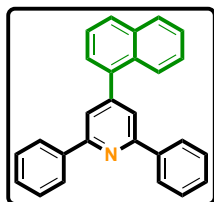

Compound 2i  
<sup>13</sup>C NMR (125 MHz, CDCl<sub>3</sub>) spectra

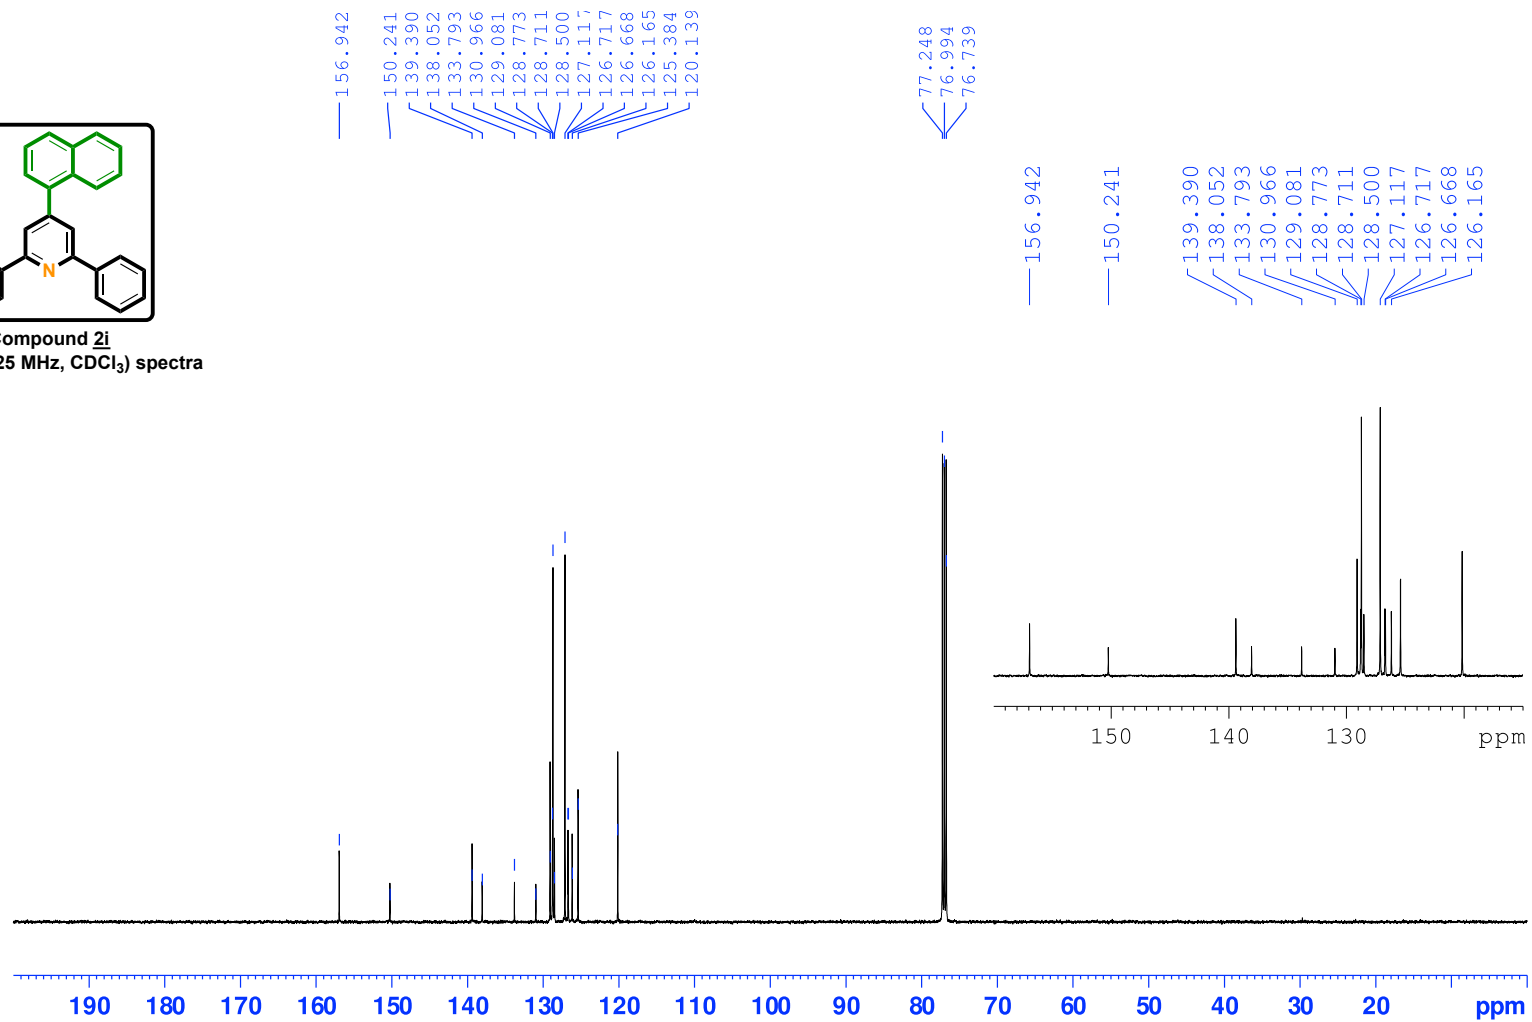

# Compound 3i

1H YHC-435 sep 51-54 down 0625

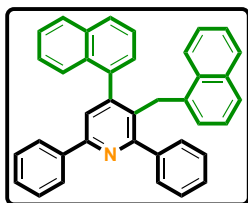

Compound 3i  
<sup>1</sup>H NMR (500 MHz, CDCl<sub>3</sub>) spectra

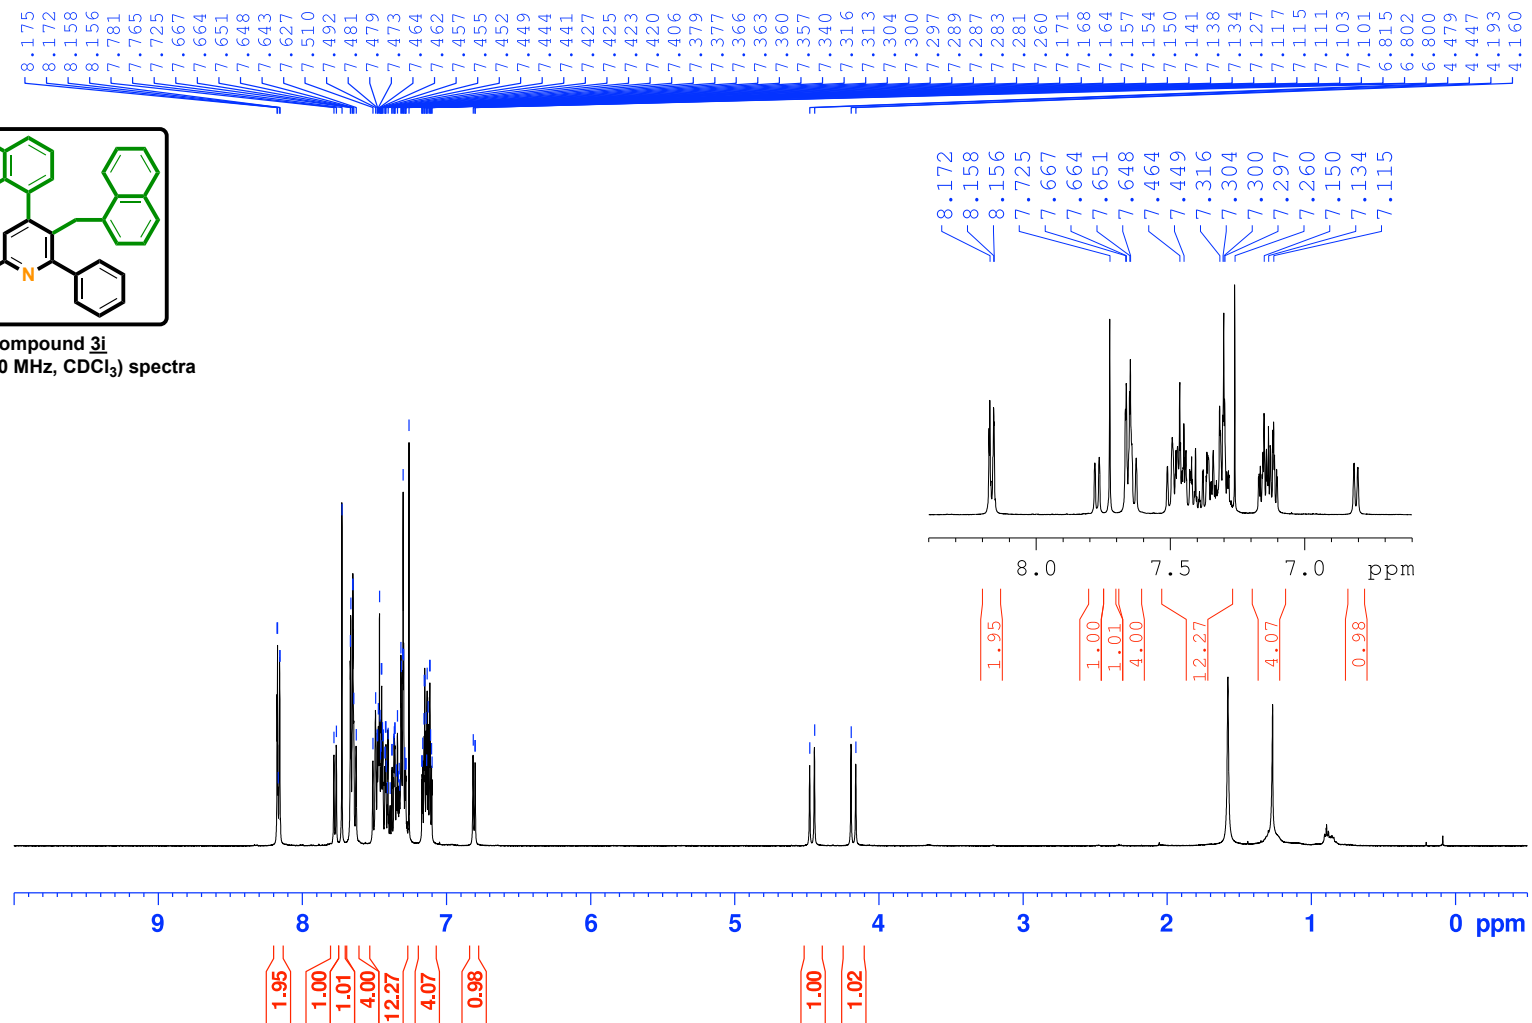



# Compound 3i

13C YHC-435 sep 51-54 down 0625

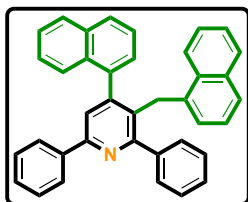

Compound 3i  
<sup>13</sup>C NMR (125 MHz, CDCl<sub>3</sub>) spectra

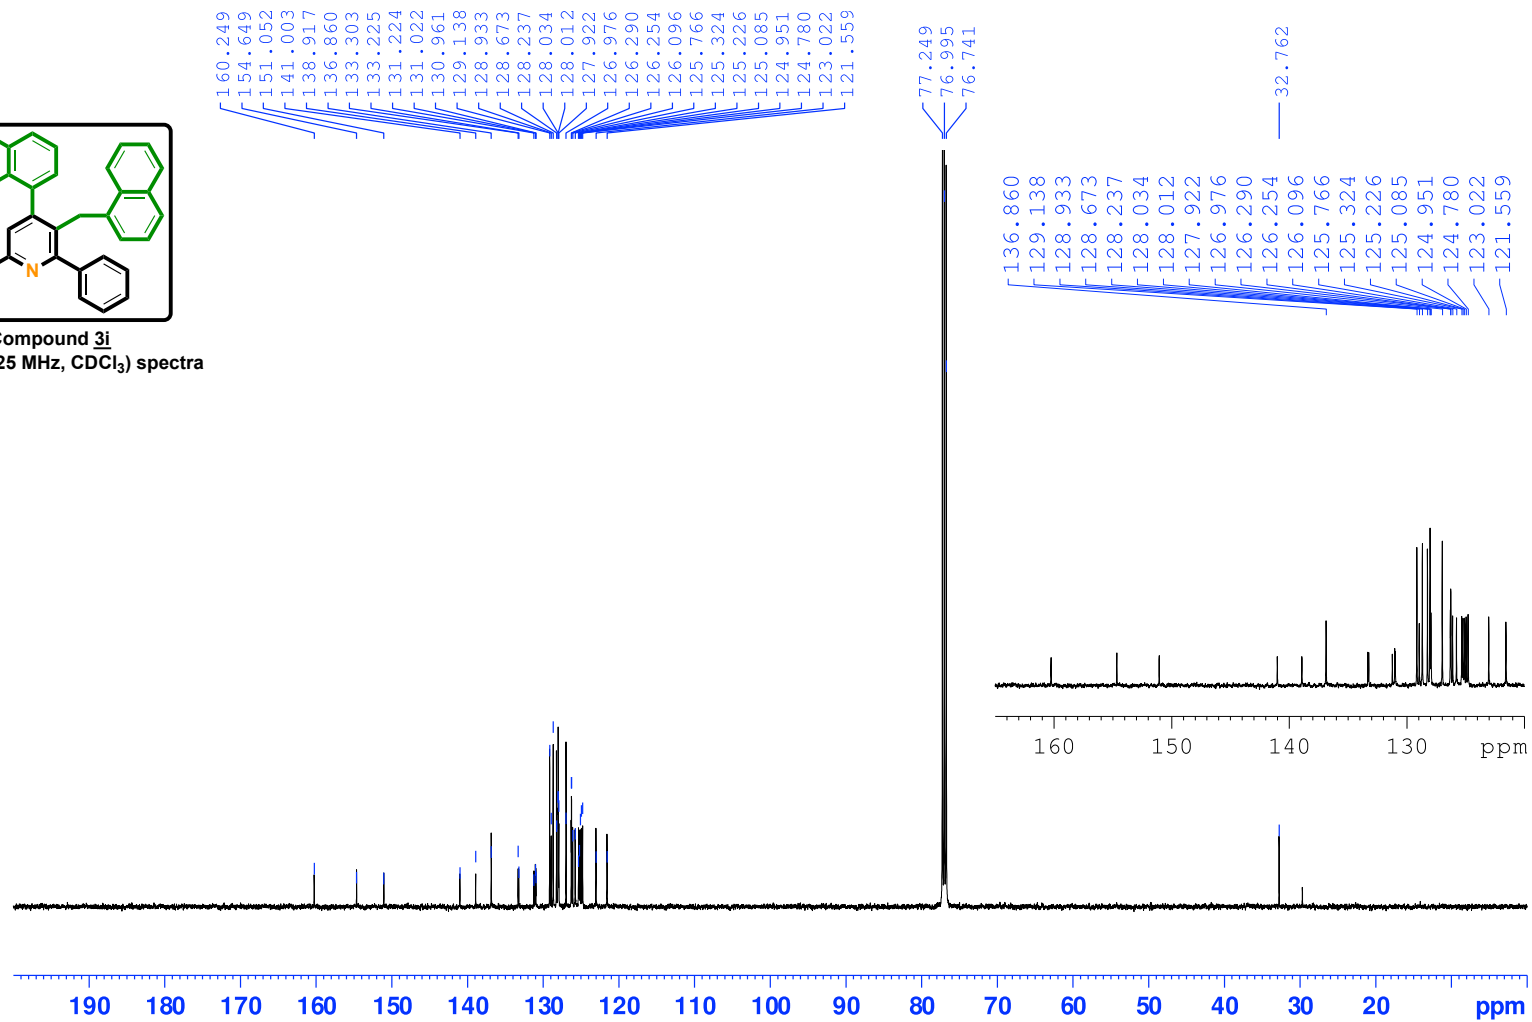

# Compound 2j

1H YHC-444 sep48 top 0830

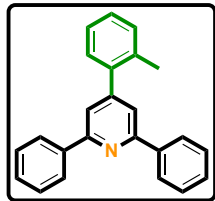

Compound 2j  
<sup>1</sup>H NMR (500 MHz, CDCl<sub>3</sub>) spectra

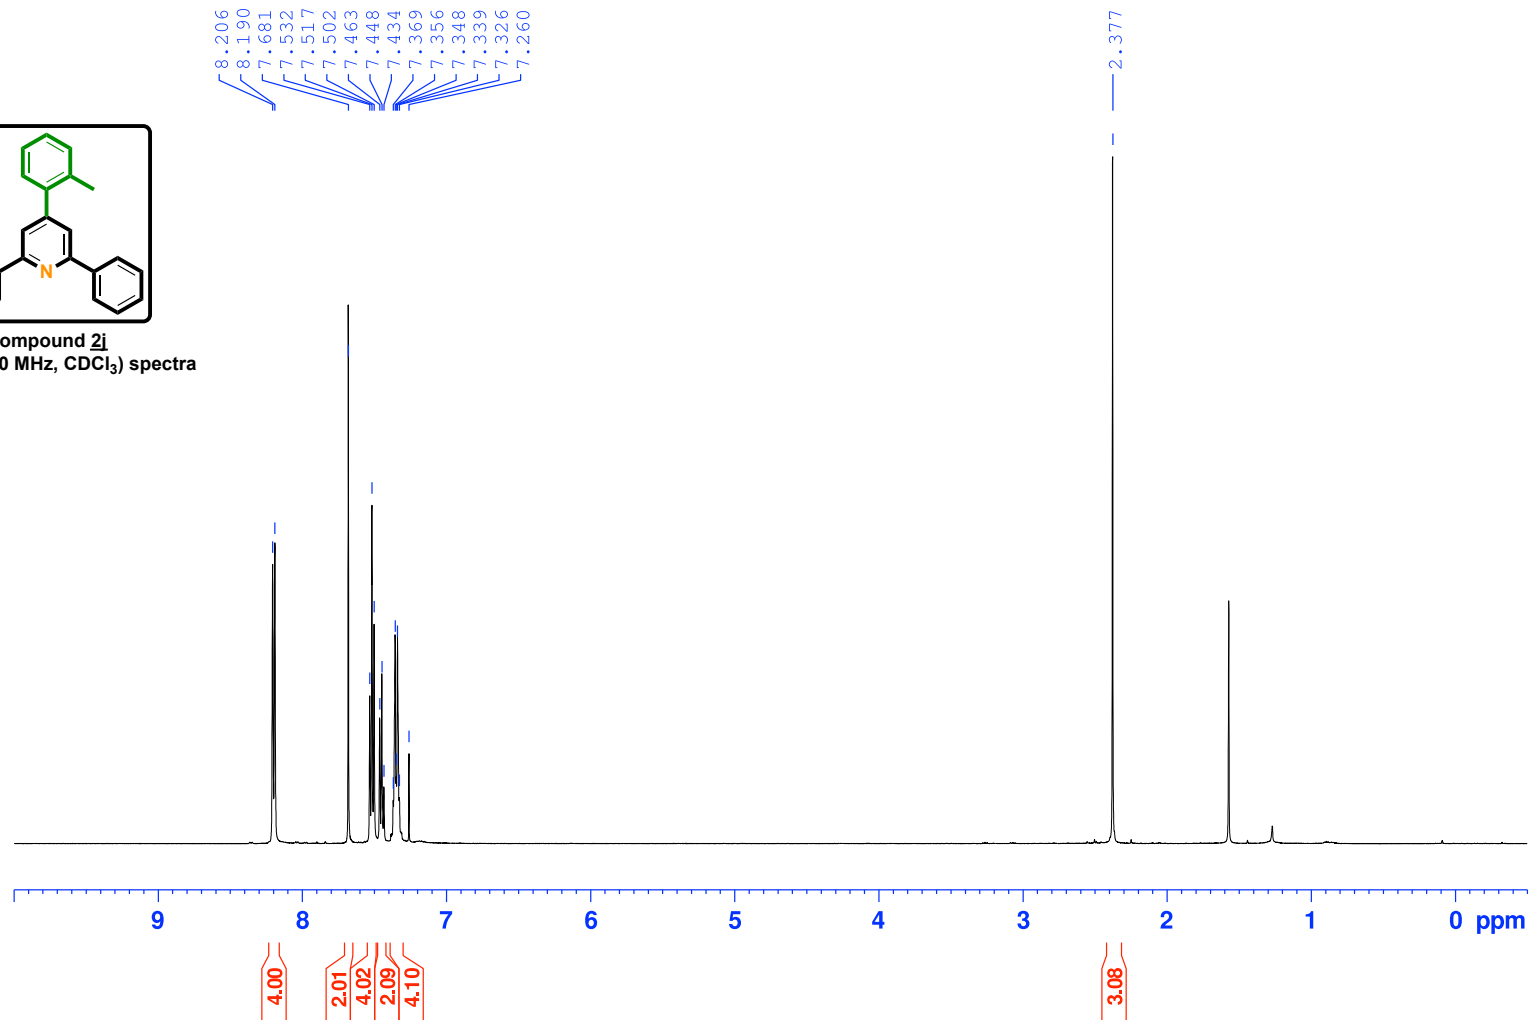

# Compound 2j

13C YHC-444 sep48 top 0830

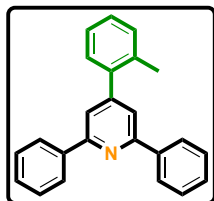

Compound 2j  
<sup>13</sup>C NMR (125 MHz, CDCl<sub>3</sub>) spectra

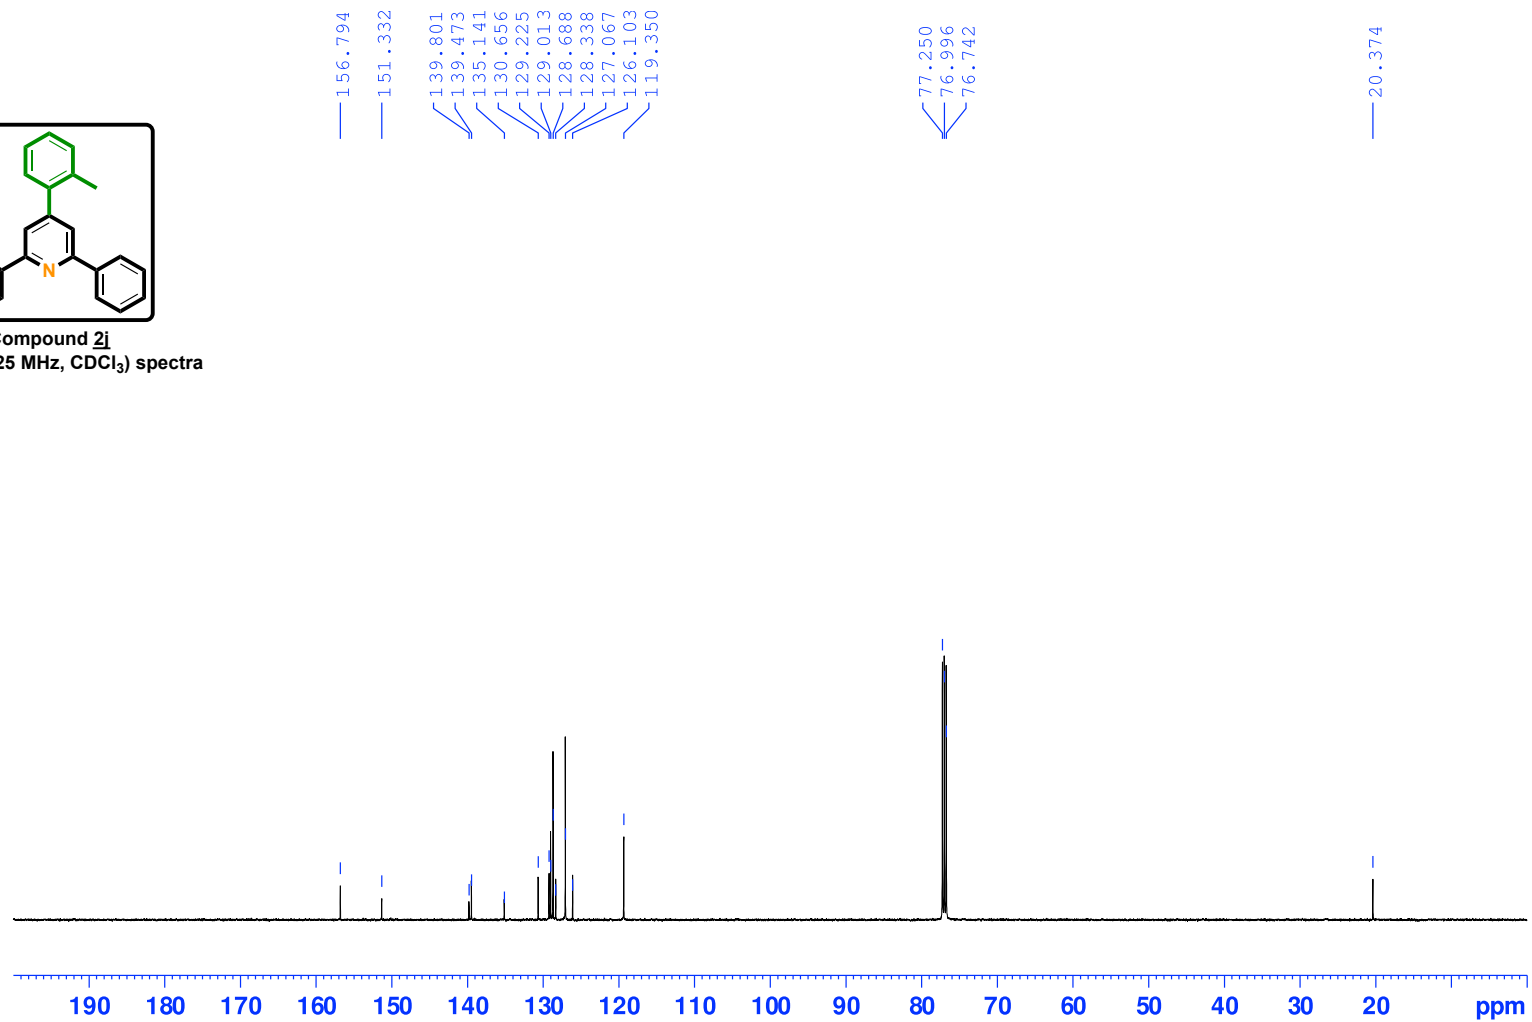

# Compound 3j

1H YHC-444 sep53-55 down 0830

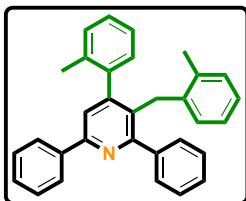

Compound 3j

<sup>1</sup>H NMR (500 MHz, CDCl<sub>3</sub>) spectra

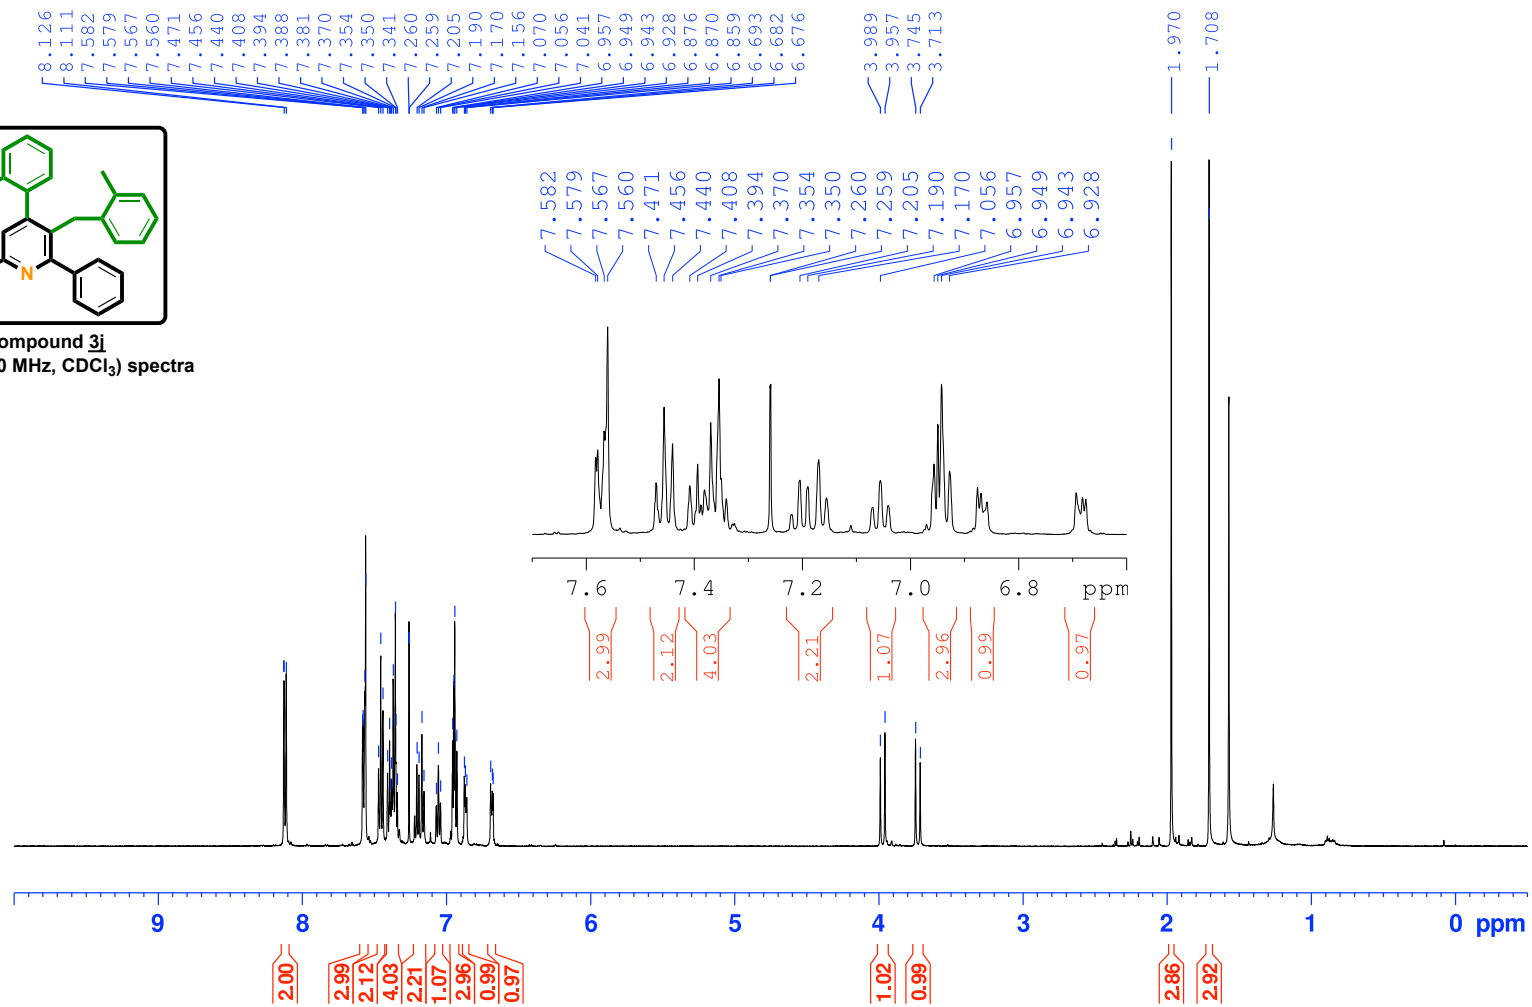

# Compound 3j

13C YHC-444 sep53-55 down 0830

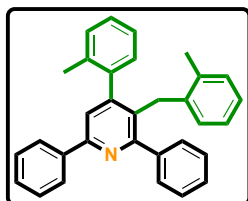

Compound 3j  
<sup>13</sup>C NMR (125 MHz, CDCl<sub>3</sub>) spectra

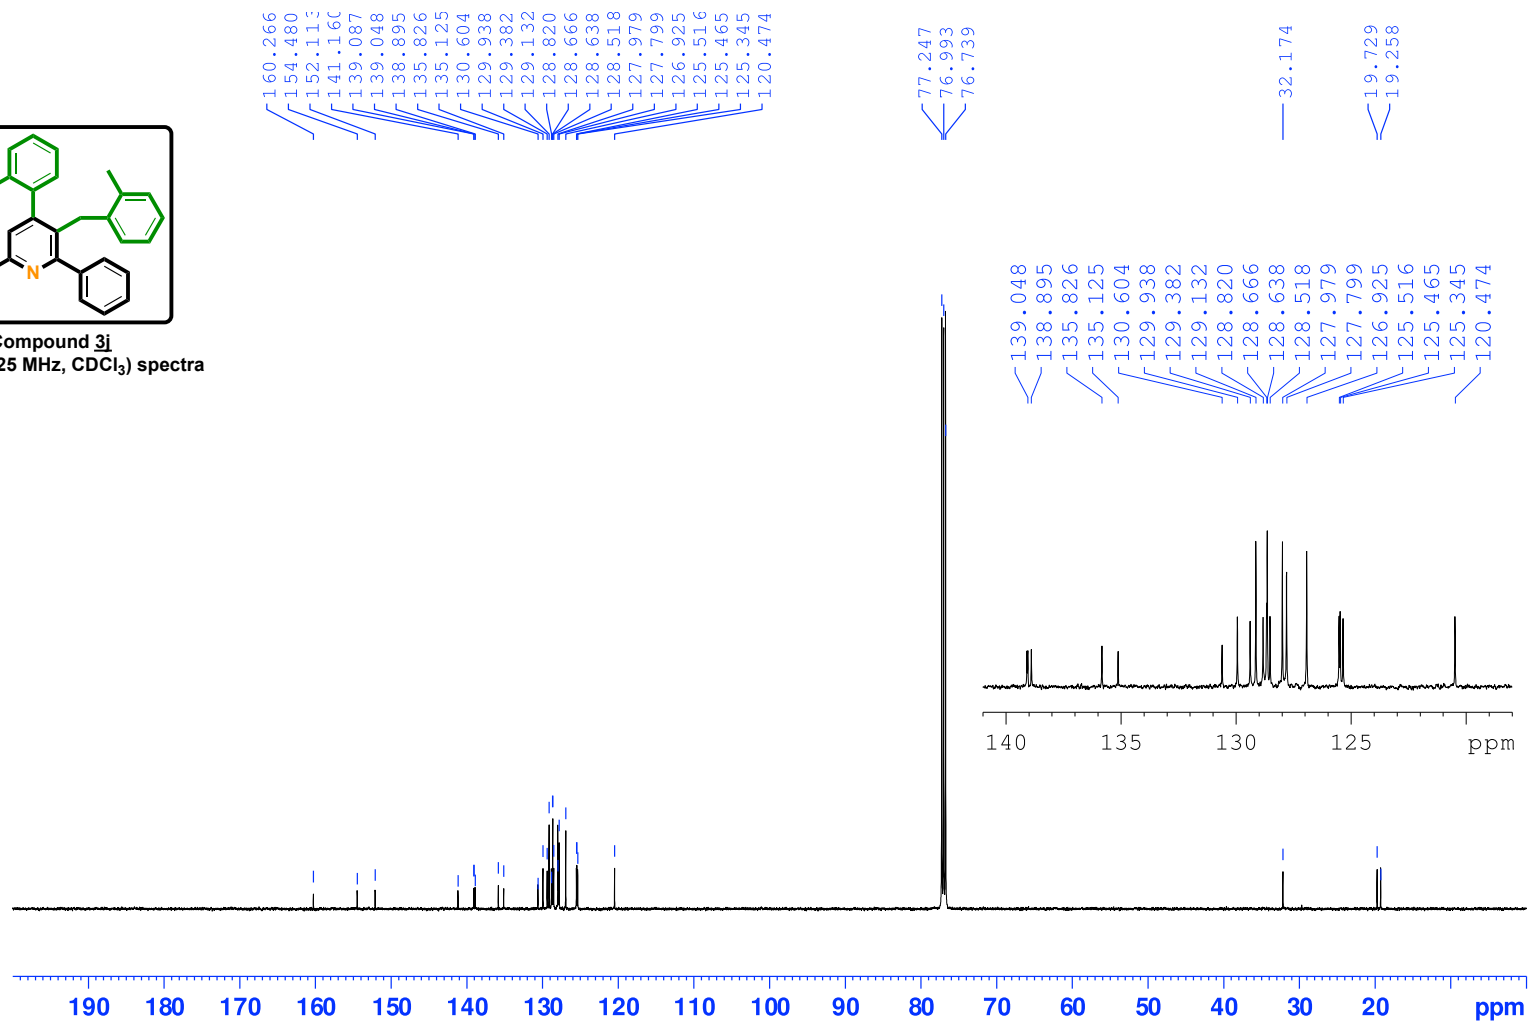

# Compound 2k

1H YHC-442 sep 4243 top 0826

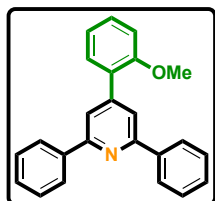

Compound 2k  
<sup>1</sup>H NMR (500 MHz, CDCl<sub>3</sub>) spectra

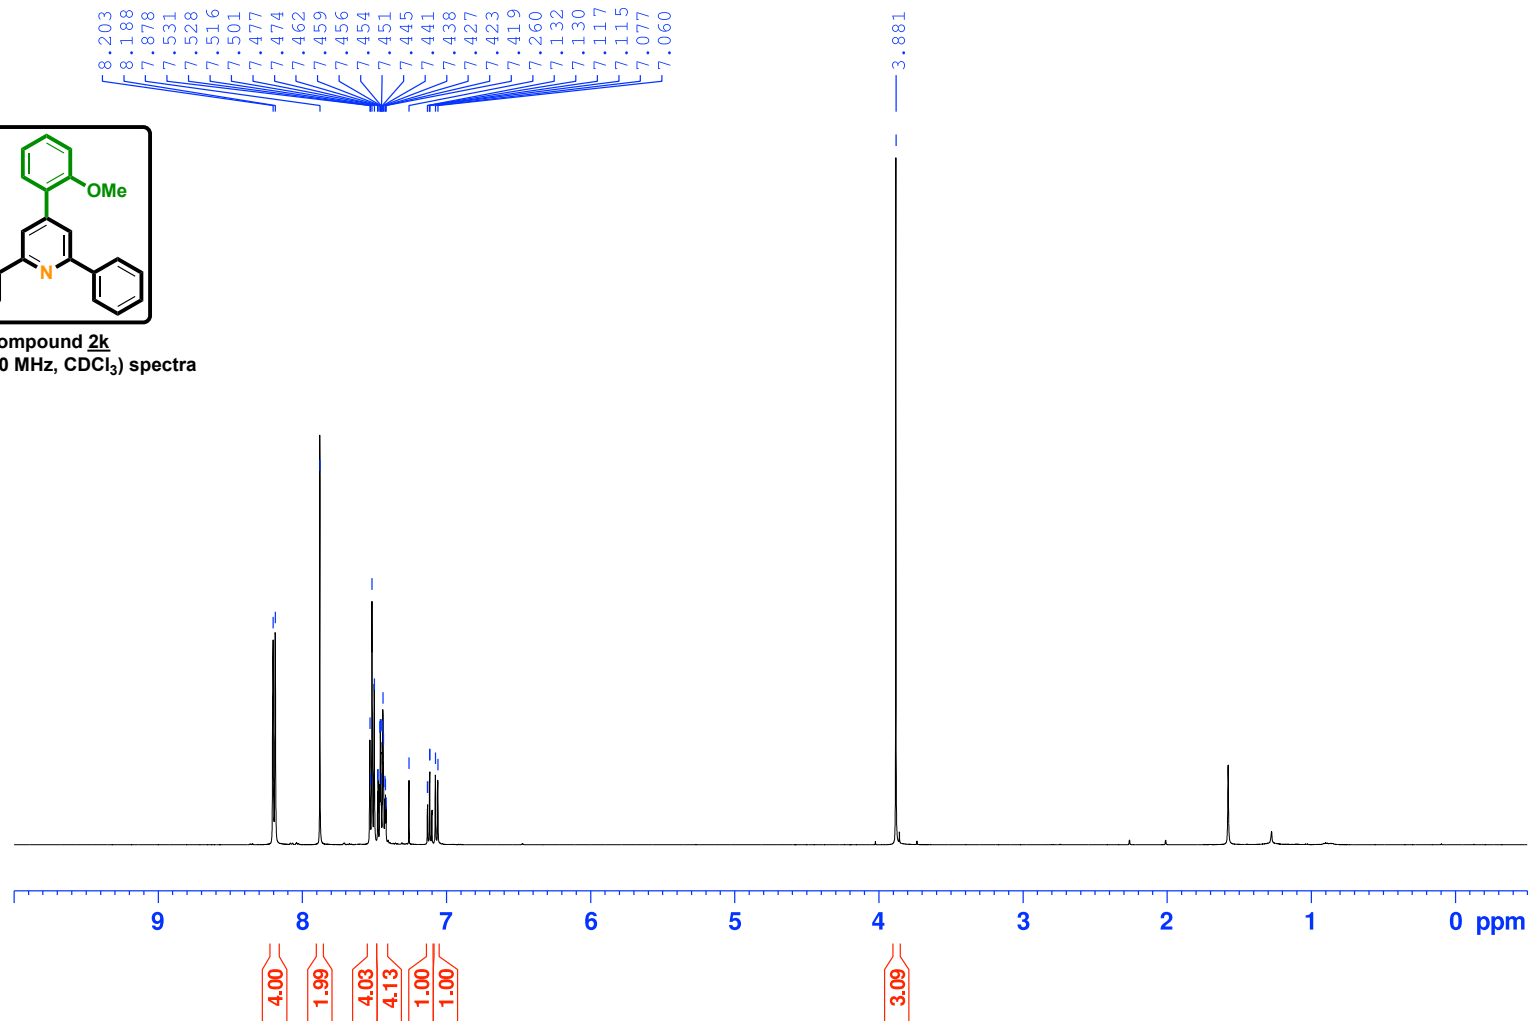

# Compound 2k

13C YHC-442 sep 4243 top 0826

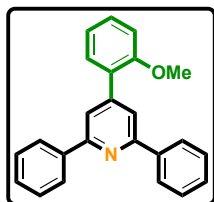

Compound 2k  
<sup>13</sup>C NMR (125 MHz, CDCl<sub>3</sub>) spectra

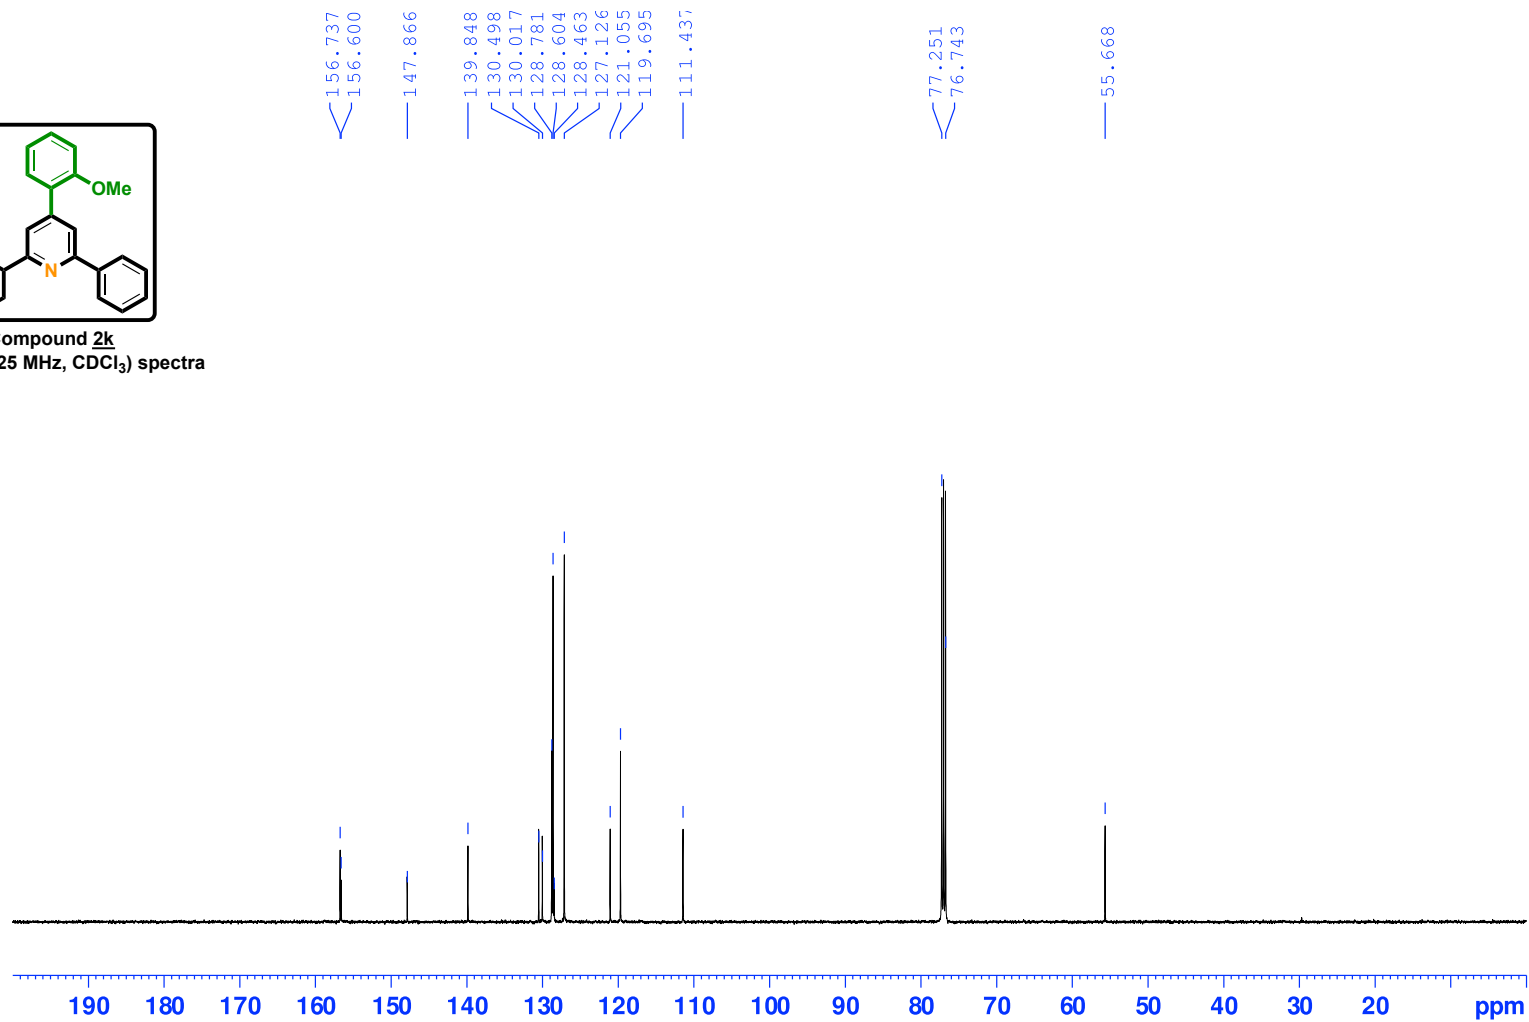

# Compound 3k

1H YHC-442-3 sep 6869 down 1028

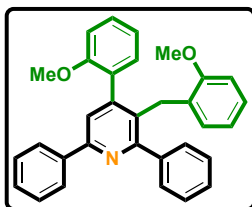

Compound 3k  
<sup>1</sup>H NMR (500 MHz, CDCl<sub>3</sub>) spectra

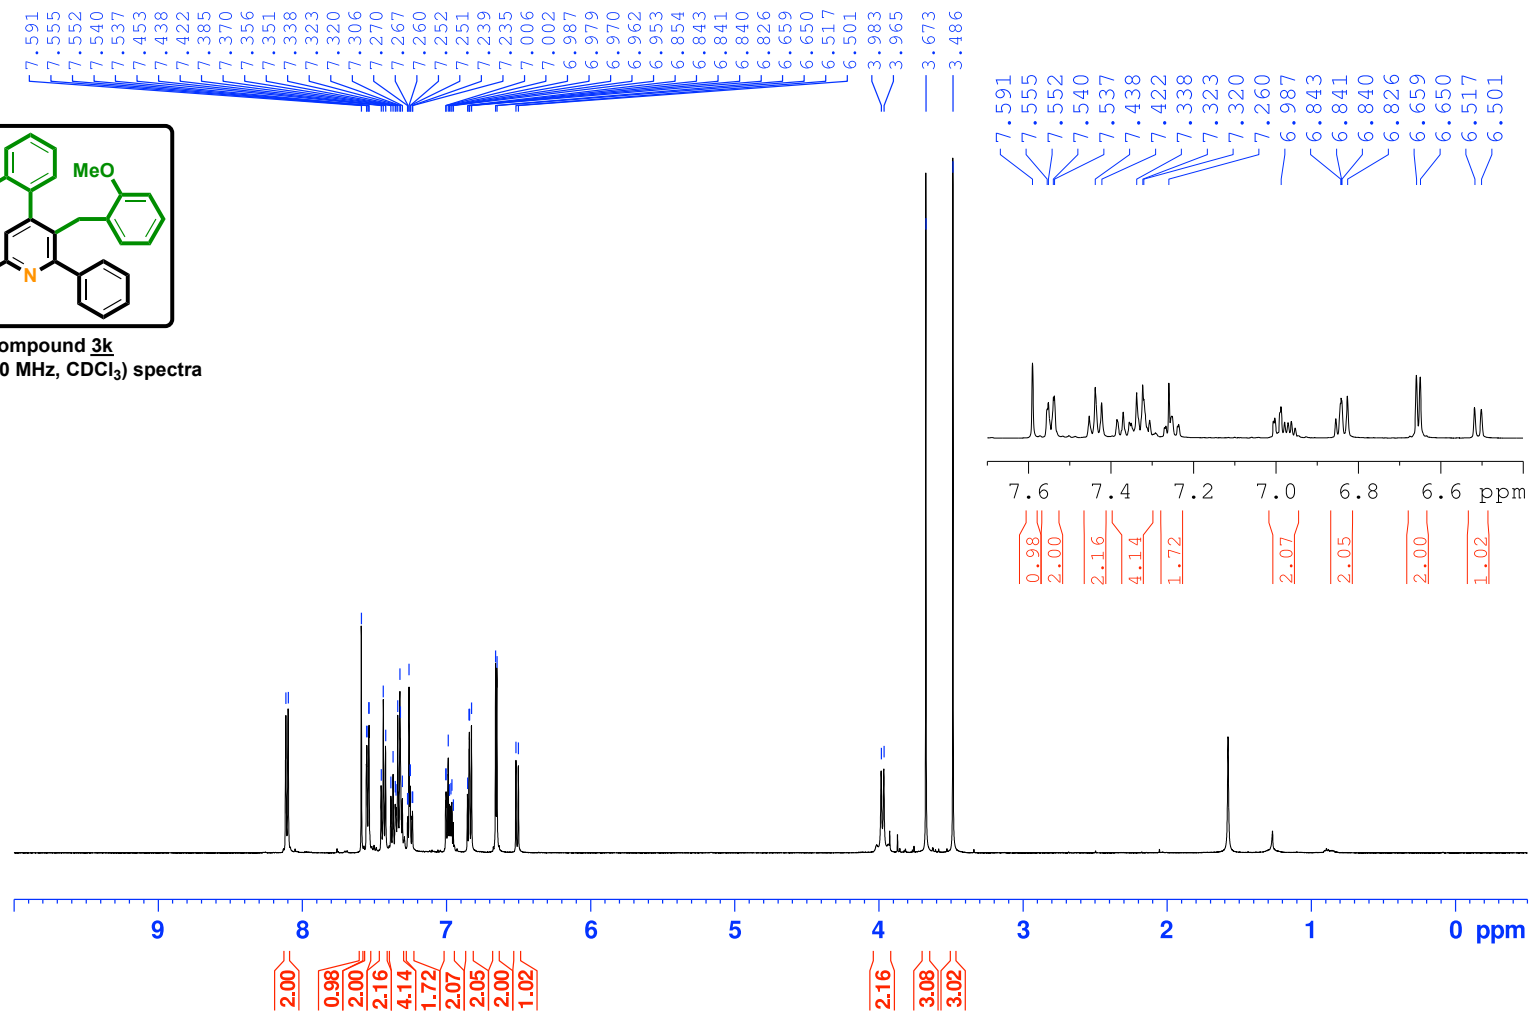



# Compound 3k

13C YHC-442-3 sep 6869 down 1028

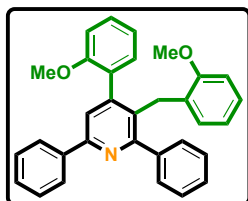

Compound 3k  
<sup>13</sup>C NMR (125 MHz, CDCl<sub>3</sub>) spectra

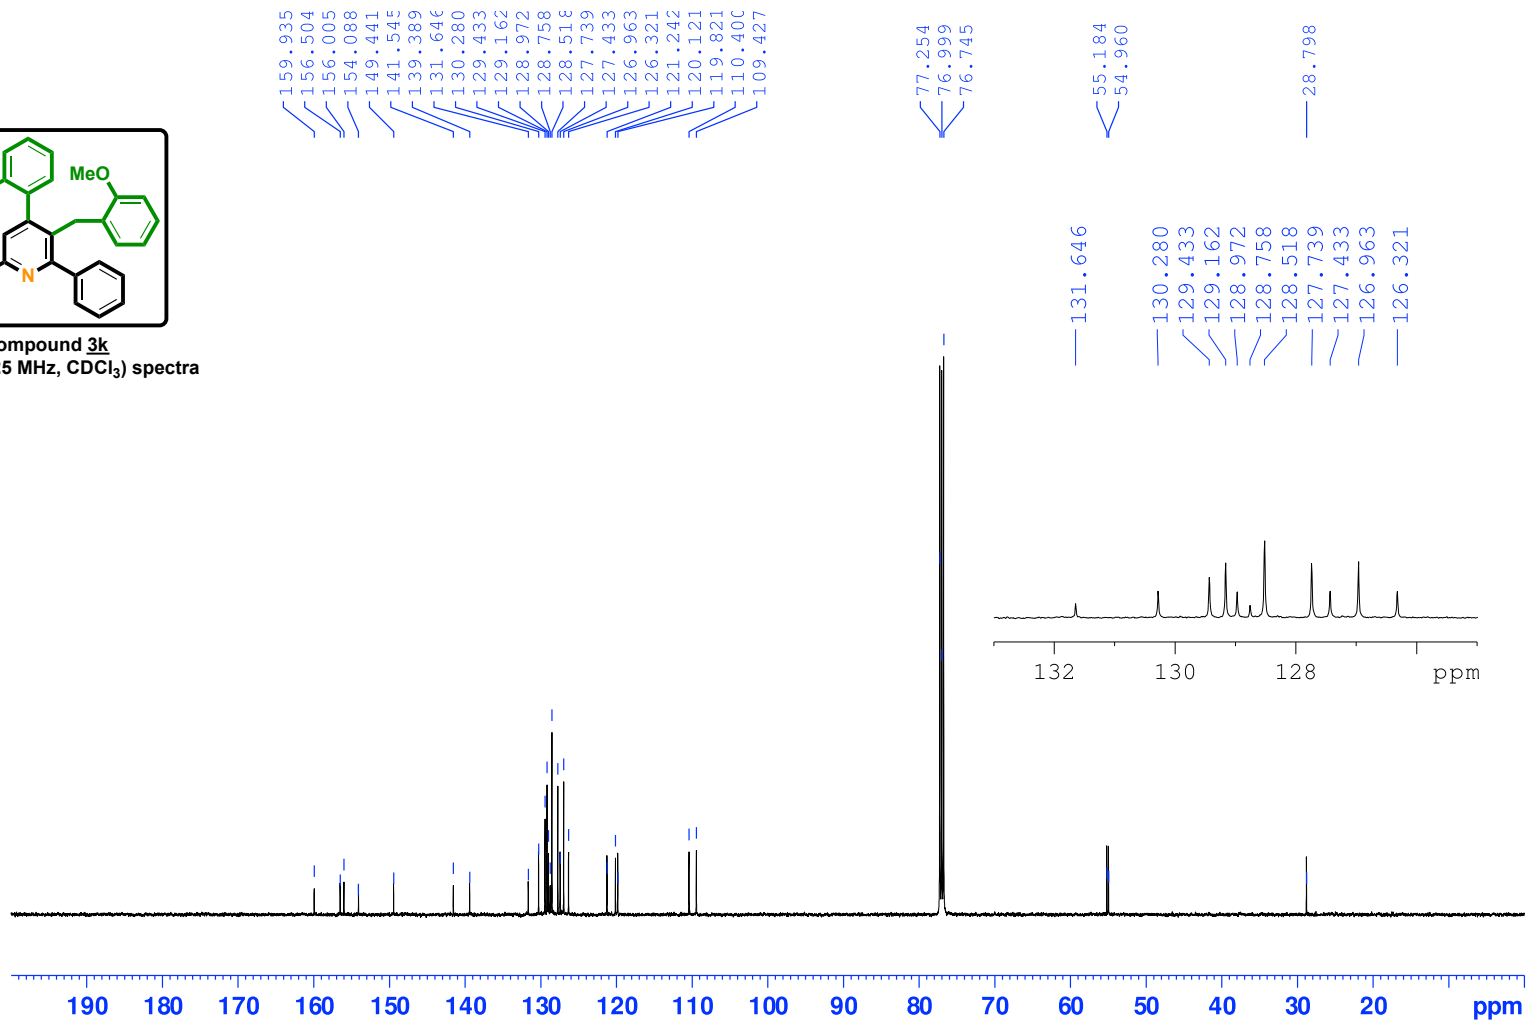

# Compound 2l

1H YHC-445 sep42 top 0903

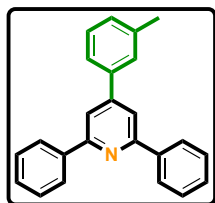

Compound 2l  
<sup>1</sup>H NMR (500 MHz, CDCl<sub>3</sub>) spectra

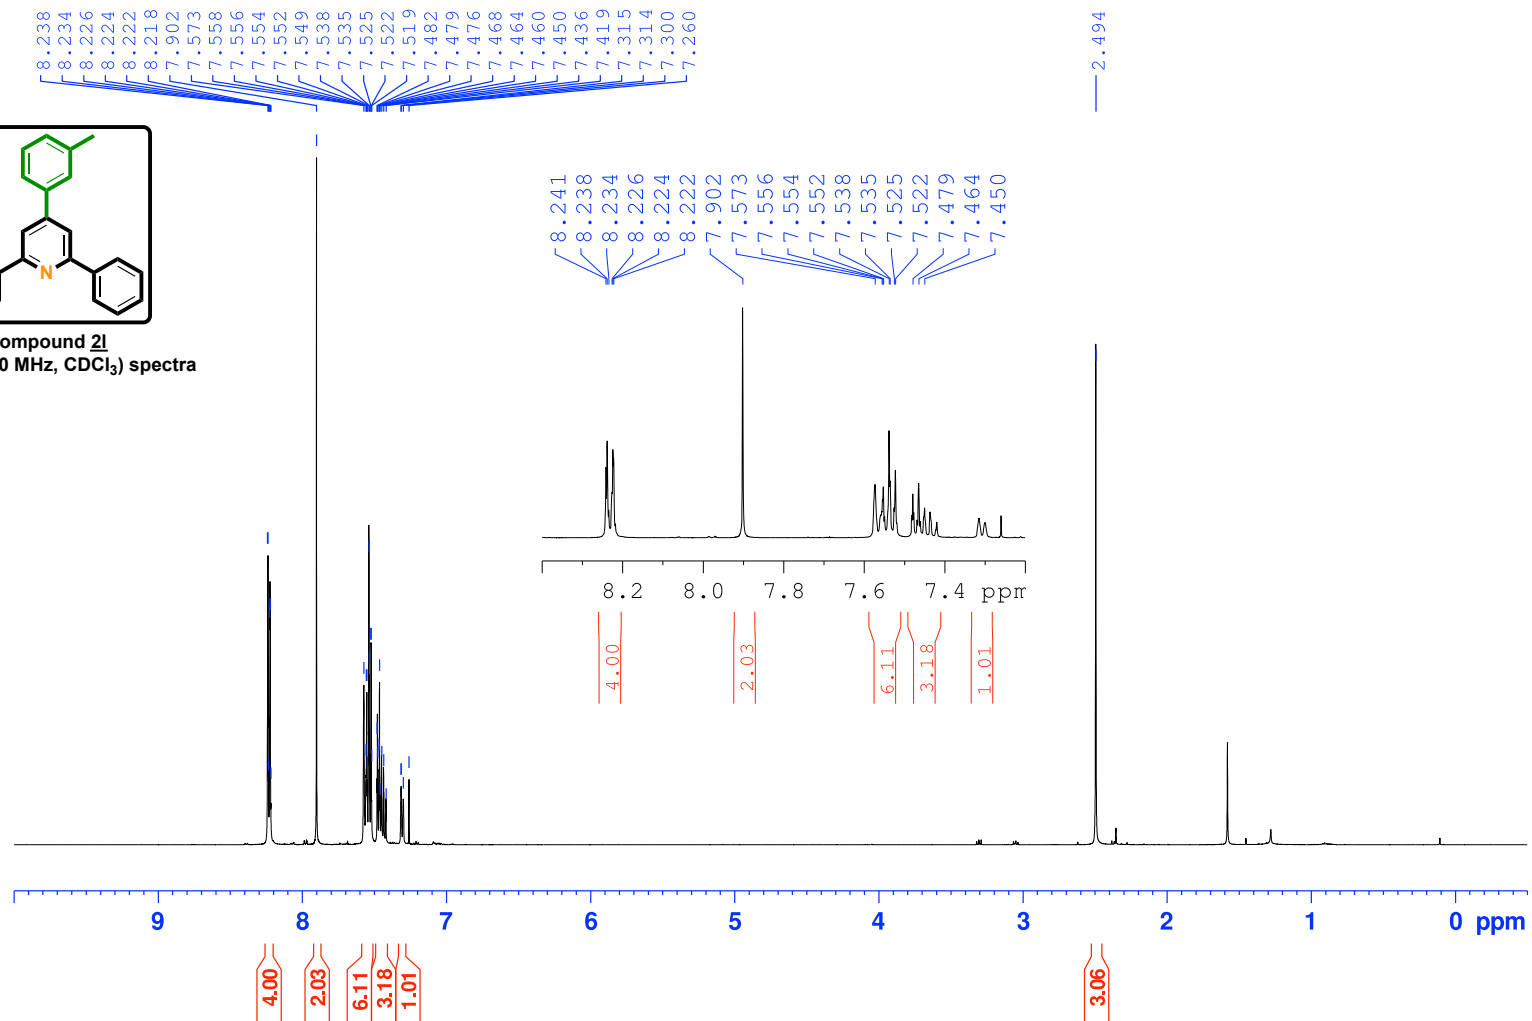

# Compound 2l

13C YHC-445 sep42 top 0903

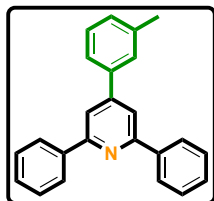

Compound 2l  
<sup>13</sup>C NMR (125 MHz, CDCl<sub>3</sub>) spectra

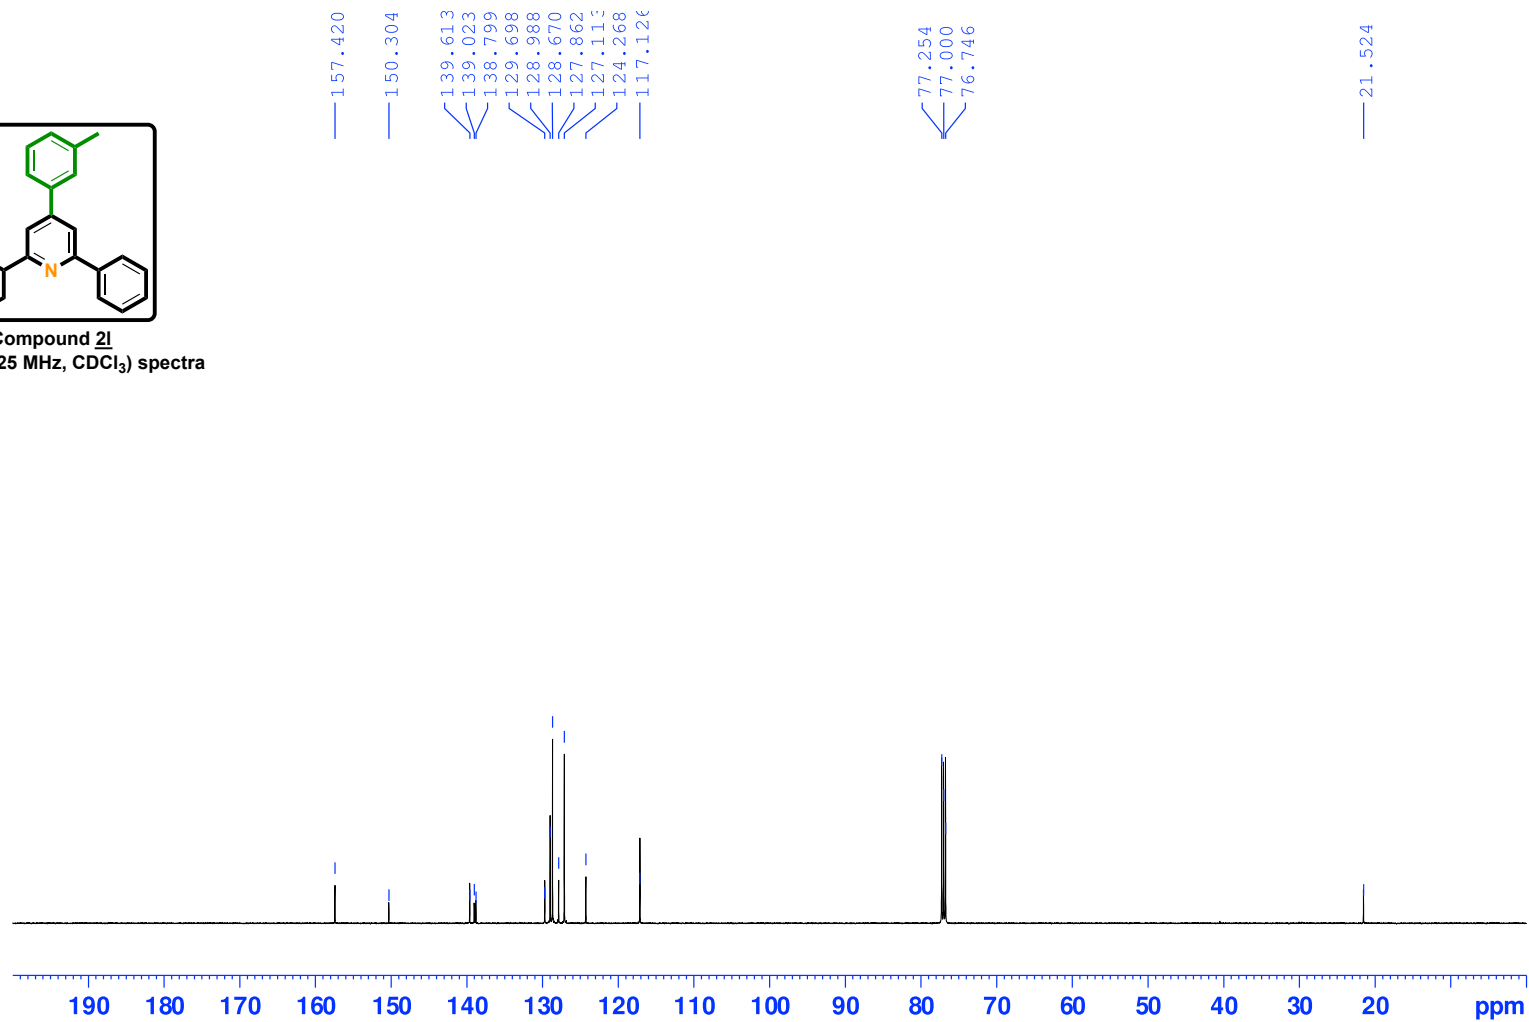

# Compound 3l

1H YHC-445 sep5354 down 0901

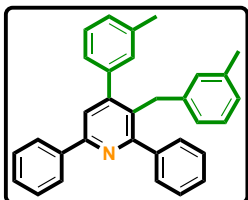

Compound 3l  
<sup>1</sup>H NMR (500 MHz, CDCl<sub>3</sub>) spectra

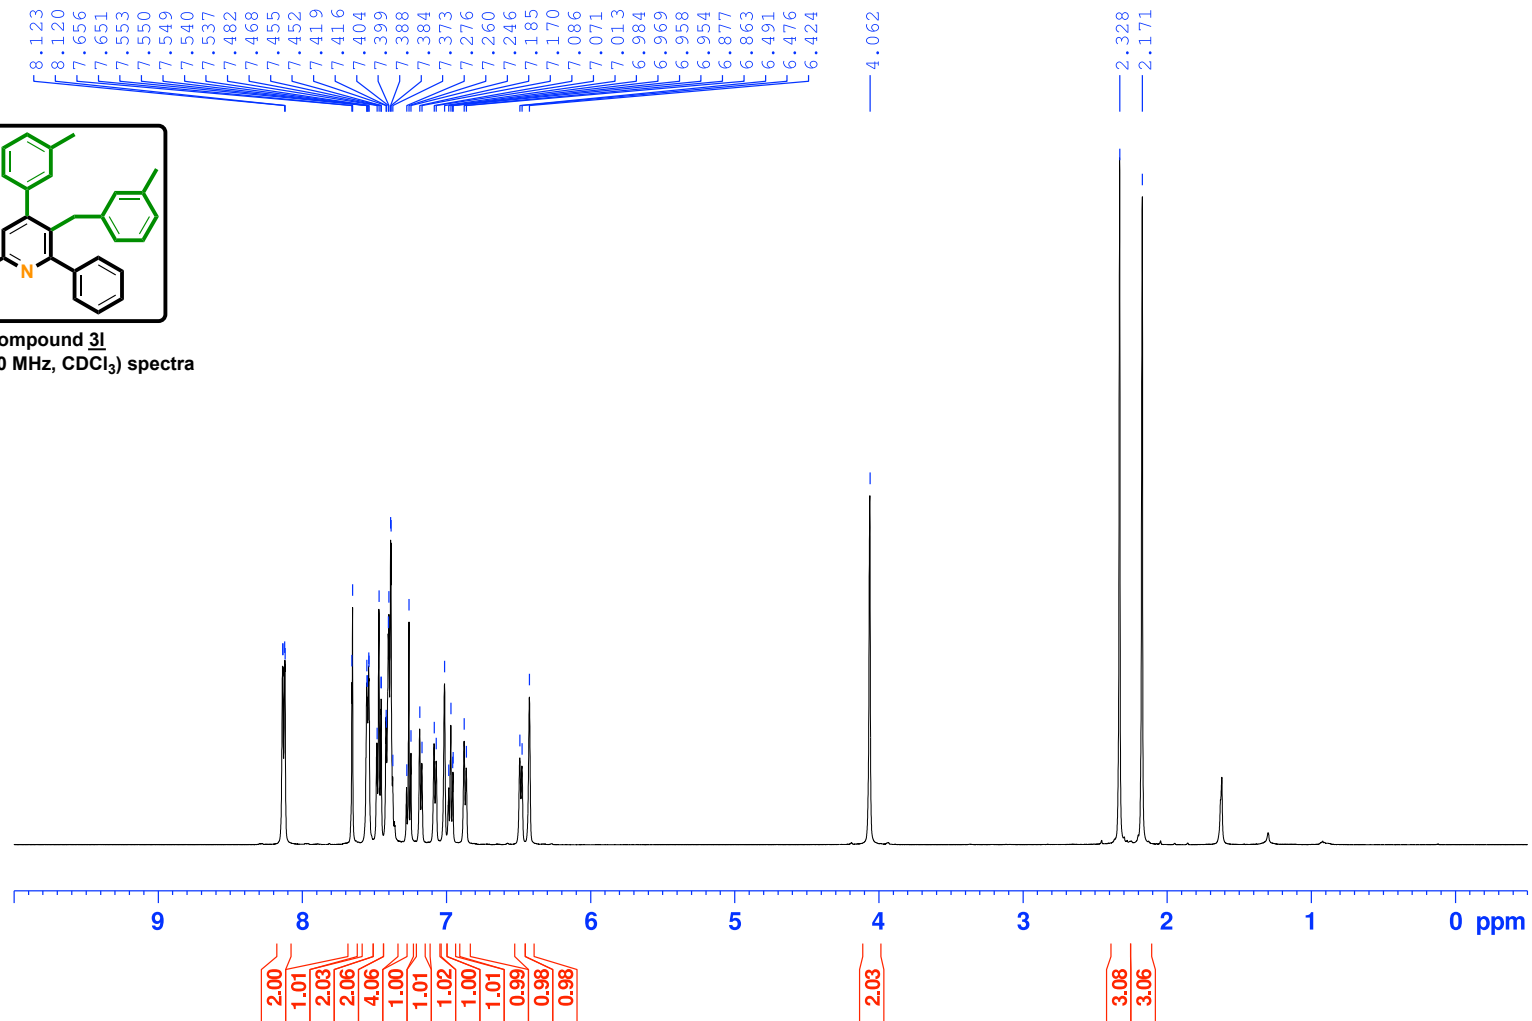

# Compound 3l

13C YHC-445 sep5354 down 0901

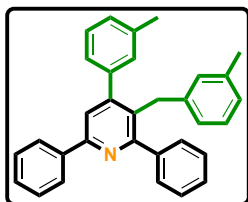

Compound 3l  
<sup>13</sup>C NMR (125 MHz, CDCl<sub>3</sub>) spectra

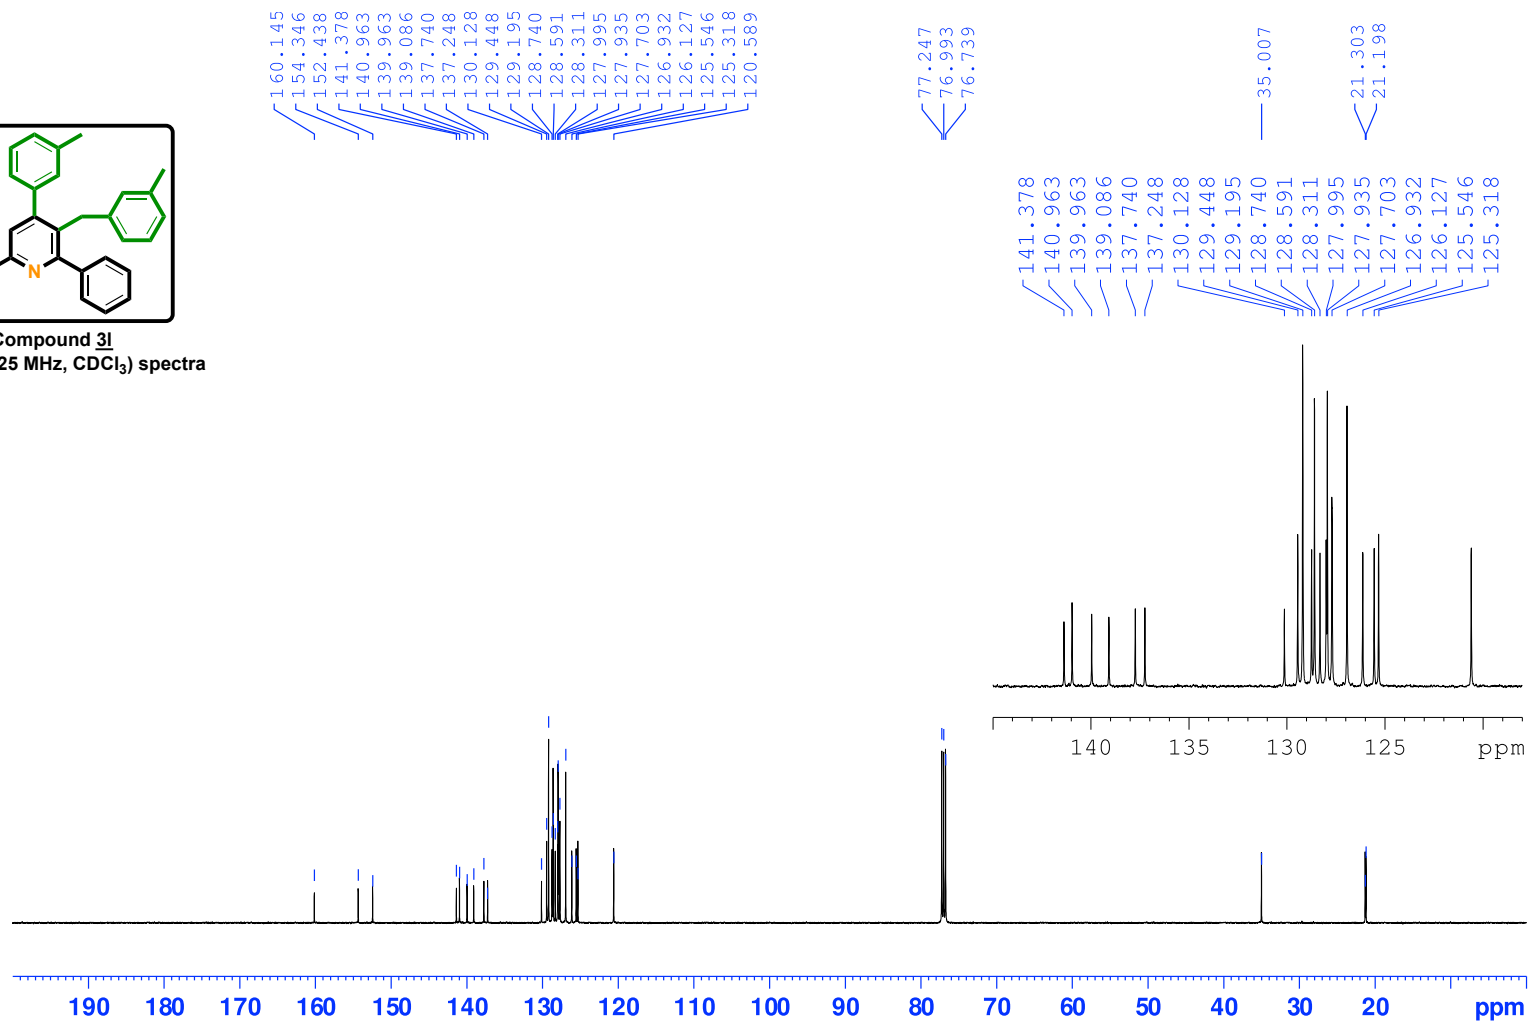

# Compound 2m

1H YHC-443 sep 4243 top 0830

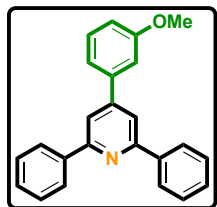

Compound 2m  
<sup>1</sup>H NMR (500 MHz, CDCl<sub>3</sub>) spectra

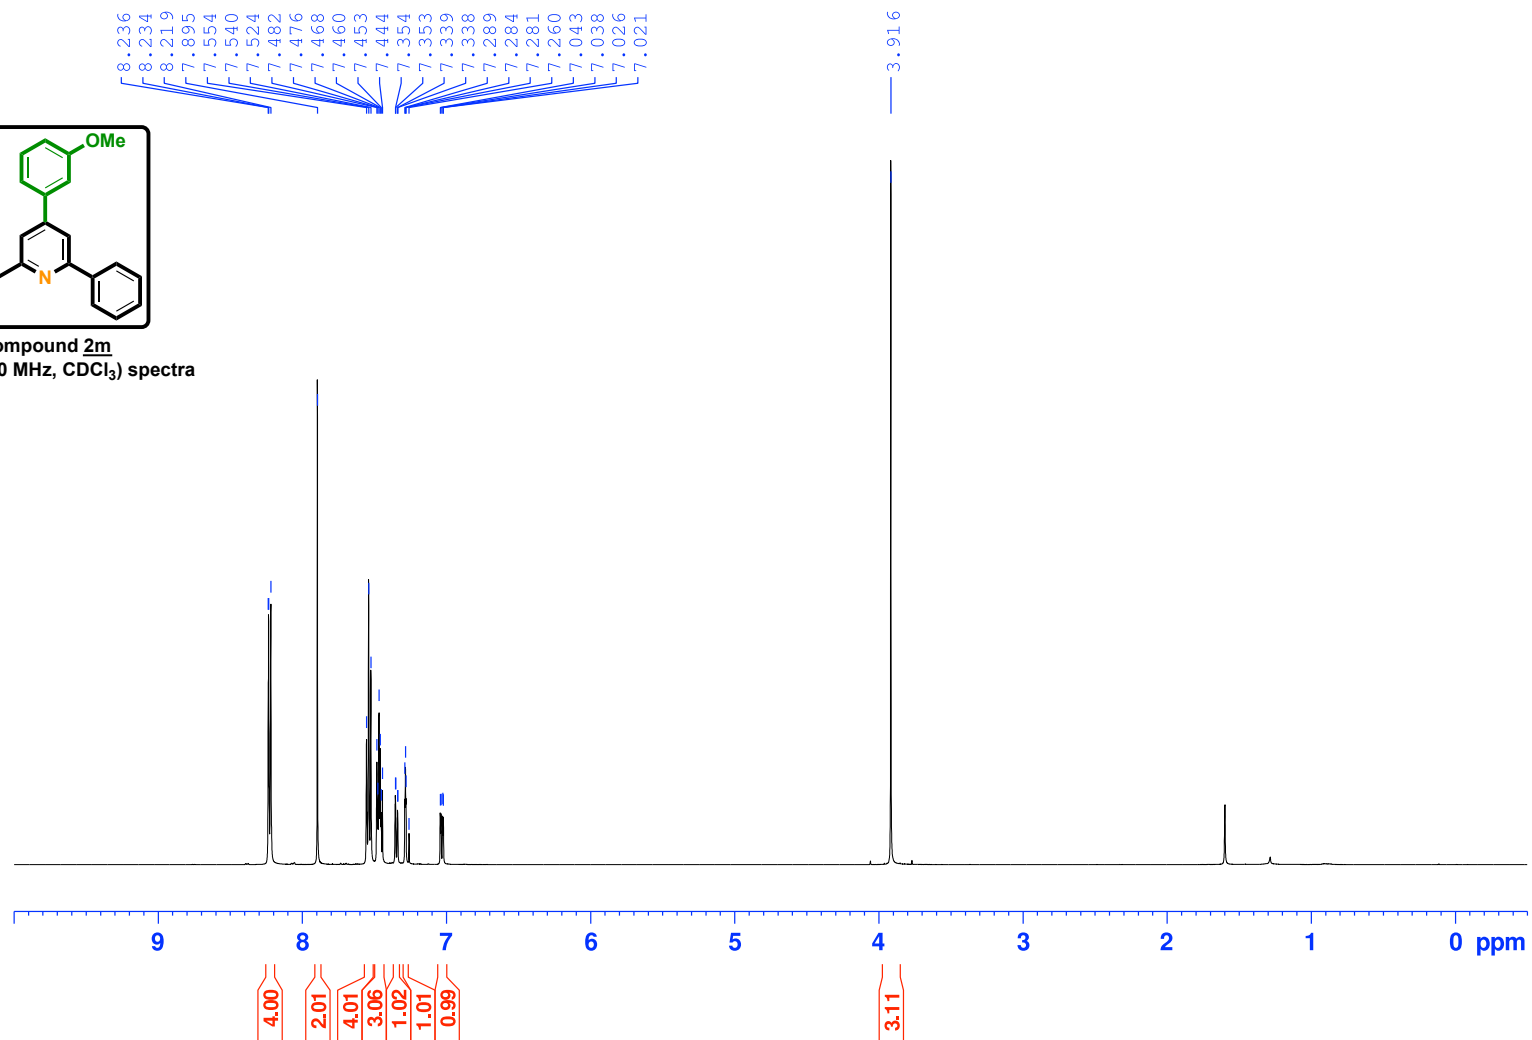

# Compound 2m

13C YHC-443 sep 4243 top 0830

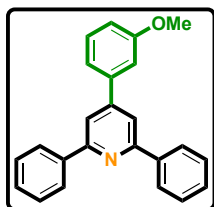

Compound 2m  
<sup>13</sup>C NMR (125 MHz, CDCl<sub>3</sub>) spectra

160.143  
157.462  
150.055  
140.534  
139.530  
130.141  
129.022  
128.674  
127.104  
119.574  
117.130  
114.167  
112.989  
77.251  
76.997  
76.743  
55.400

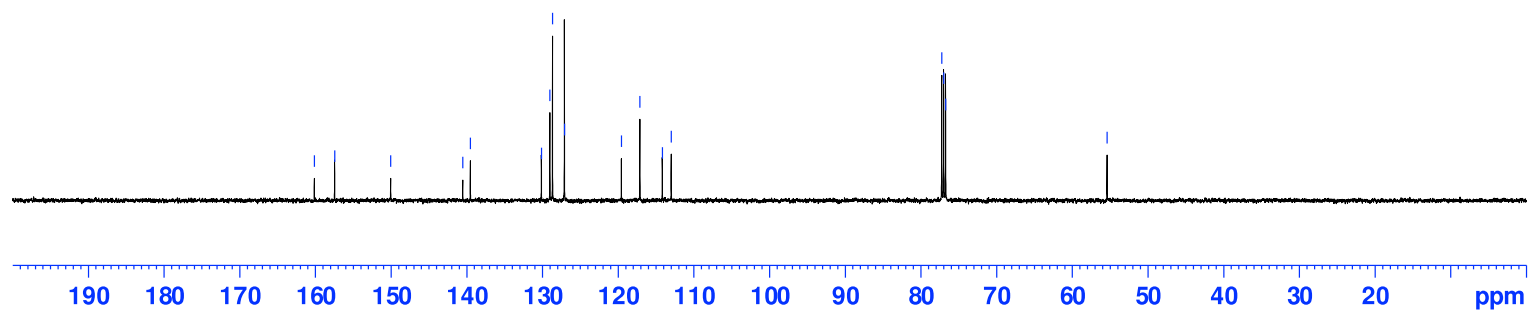

# Compound 3m

1H YHC-443 sep 8889 down 0830

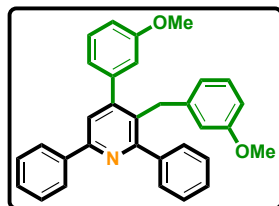

Compound 3m  
<sup>1</sup>H NMR (500 MHz, CDCl<sub>3</sub>) spectra

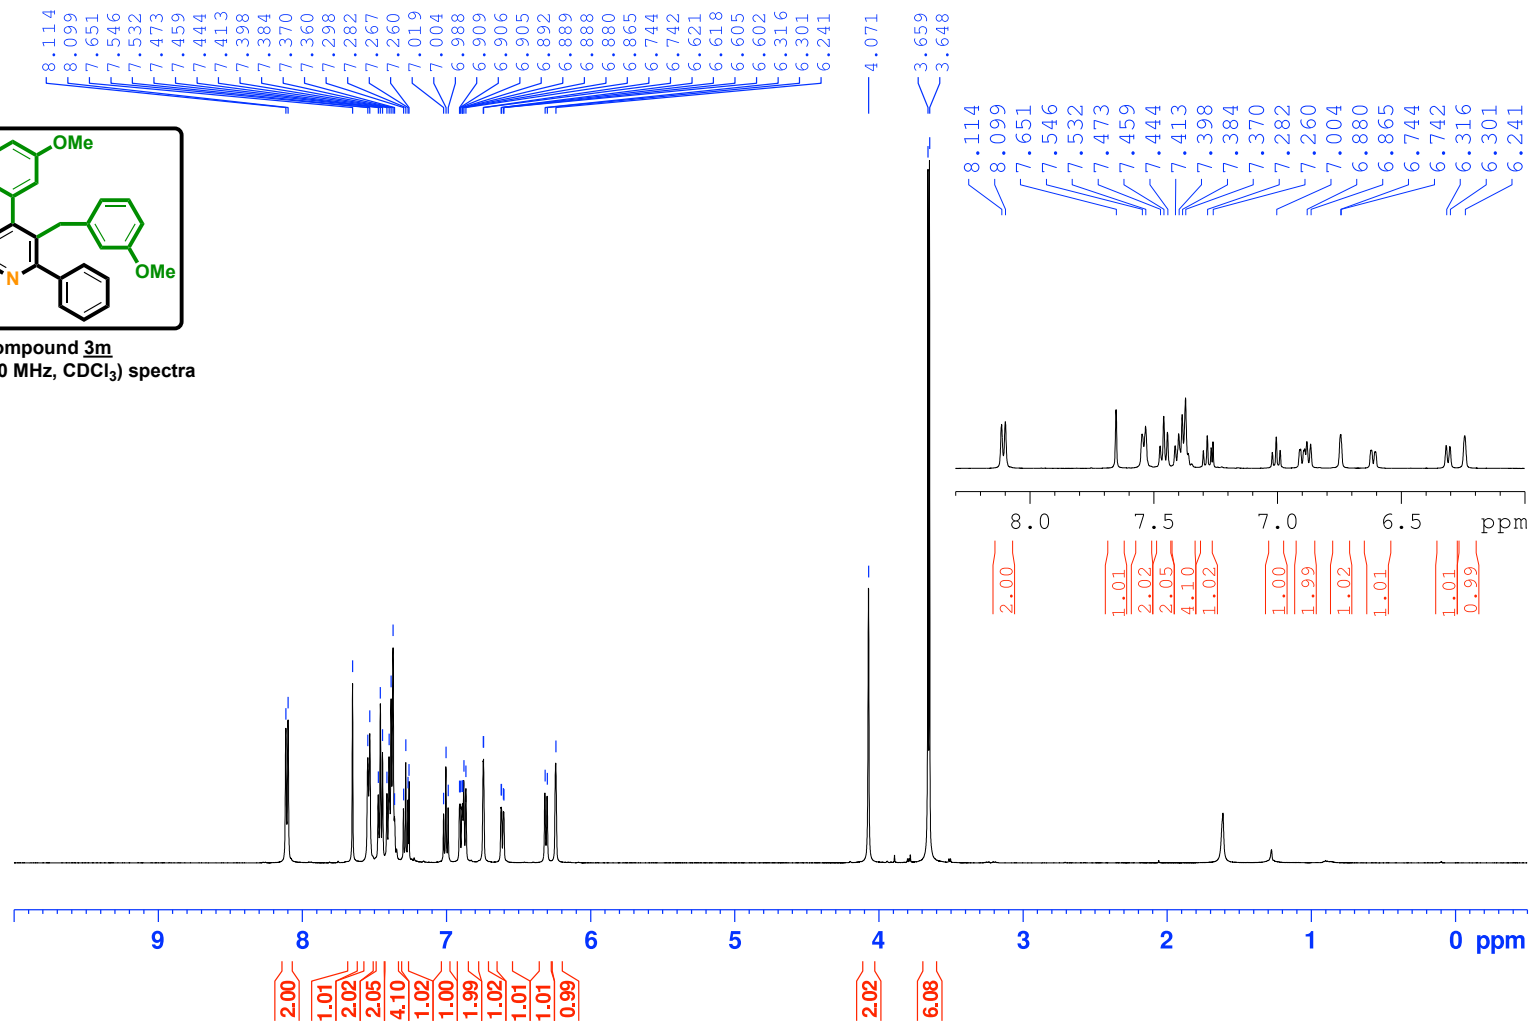



# Compound 3m

13C YHC-443 sep 8889 down 0830

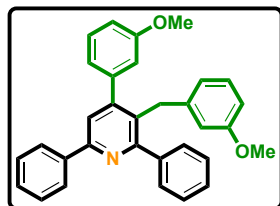

Compound 3m  
<sup>13</sup>C NMR (125 MHz, CDCl<sub>3</sub>) spectra

160.221  
159.296  
159.229  
154.590  
152.200  
142.827  
141.275  
139.017  
129.562  
129.281  
129.169  
128.865  
128.821  
128.622  
127.989  
127.793  
126.965  
120.915  
120.812  
120.516  
113.898  
113.785  
111.185

77.250  
76.743

55.063  
55.017

35.142

129.562  
129.281  
129.169  
128.865  
128.821  
128.622

127.989  
127.793

126.965

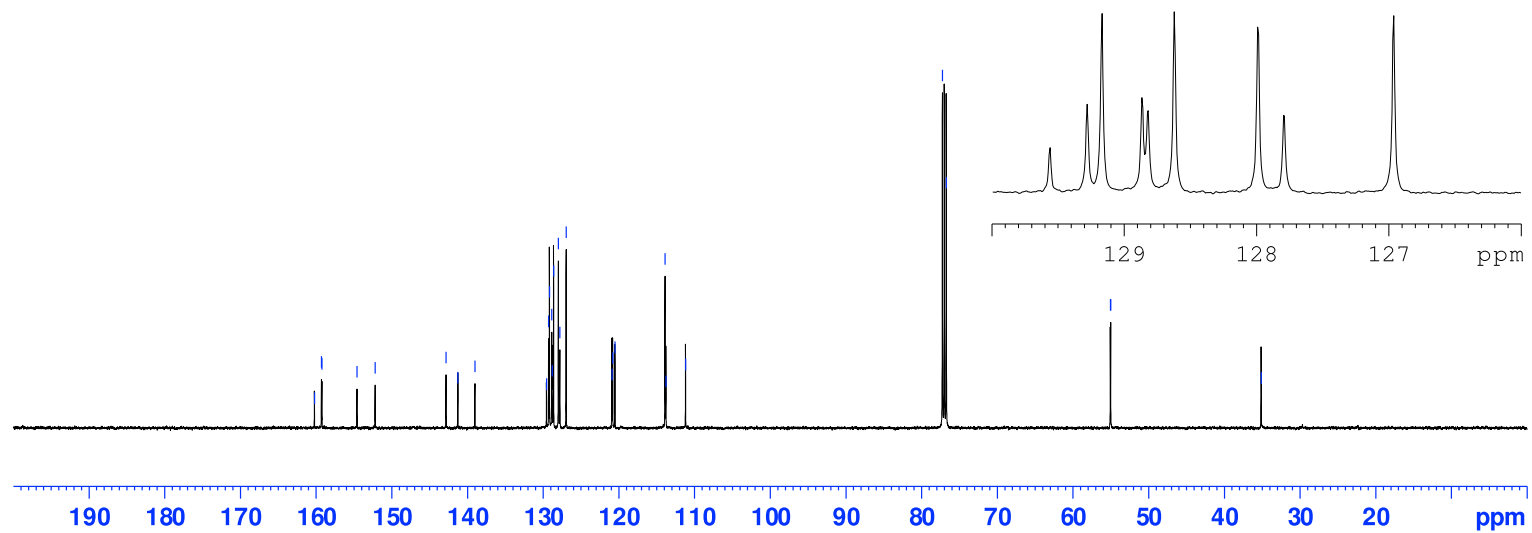

# Compound 2n

1H YHC-446 sep103 104 top 0903

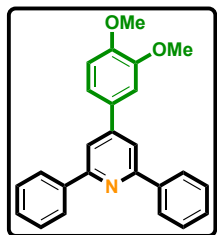

Compound 2n  
<sup>1</sup>H NMR (500 MHz, CDCl<sub>3</sub>) spectra

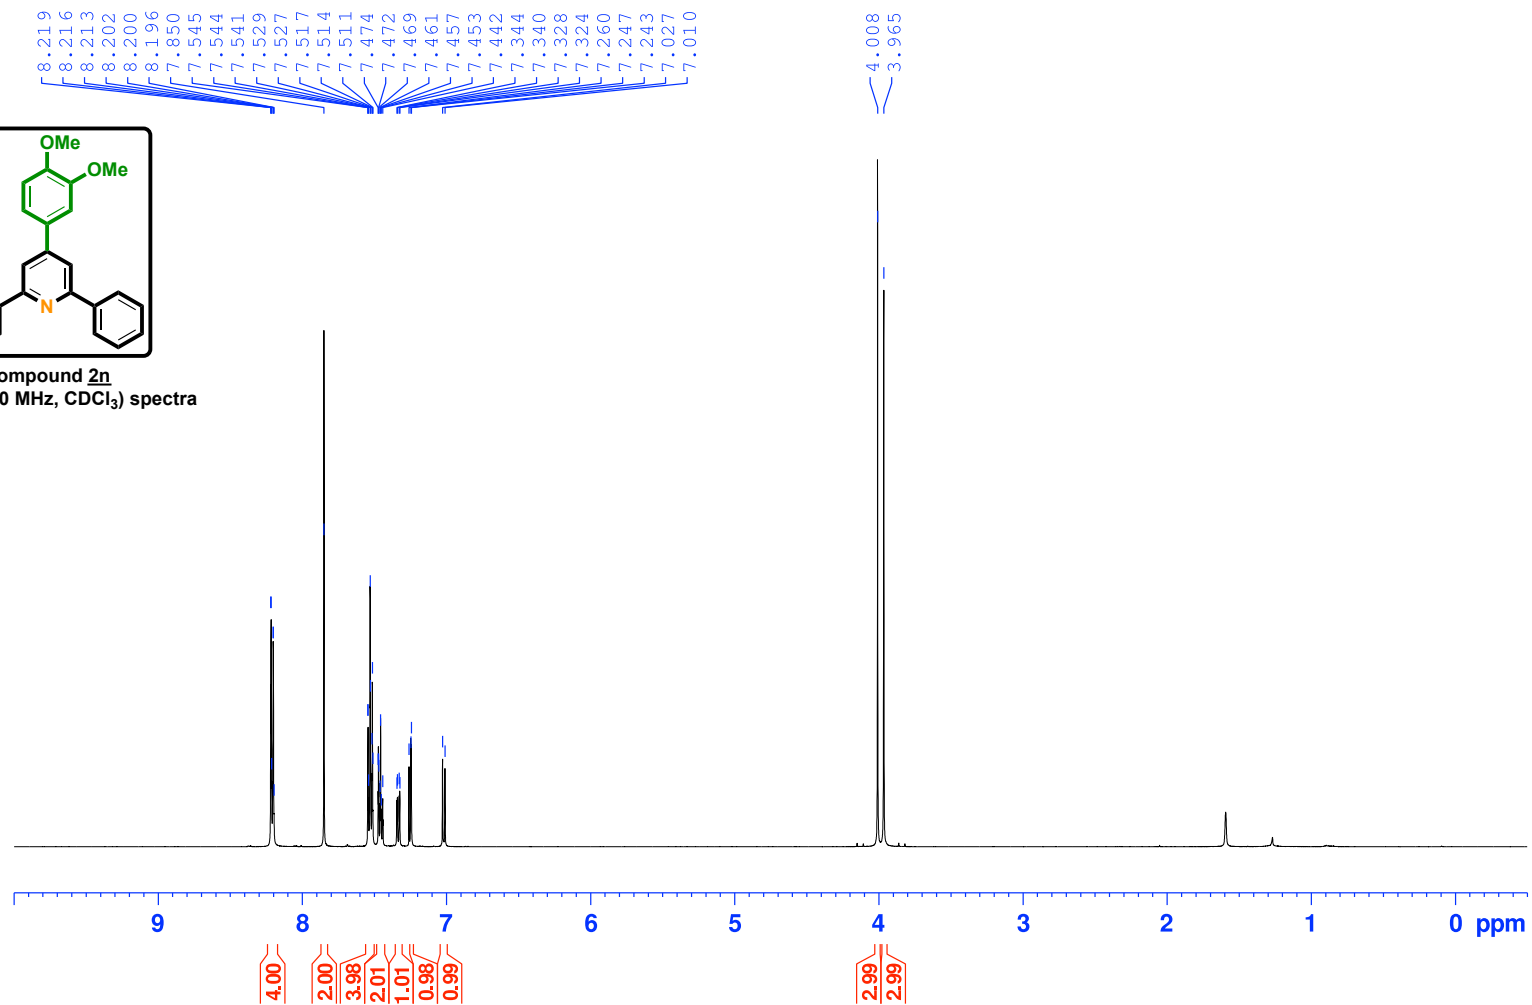

# Compound 2n

13C YHC-446 sep103 104 top 0903

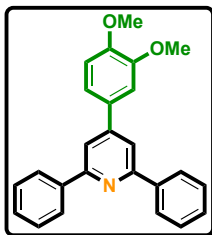

Compound 2n  
<sup>13</sup>C NMR (125 MHz, CDCl<sub>3</sub>) spectra

157.455  
149.935  
149.434  
139.638  
131.778  
128.979  
128.658  
127.104  
119.781  
116.785  
111.536  
110.145  
77.249  
76.995  
76.741  
56.095  
56.008

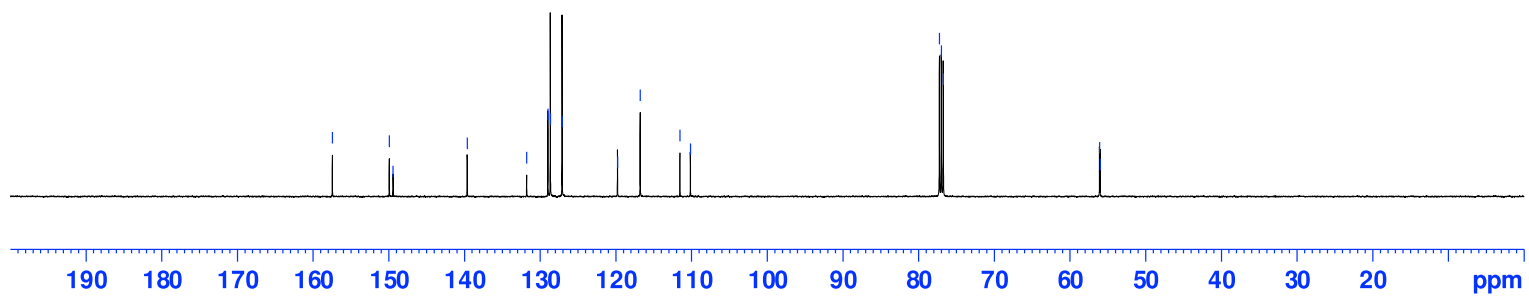

# Compound 3n

1H YHC-446 sep211 212 down 0906

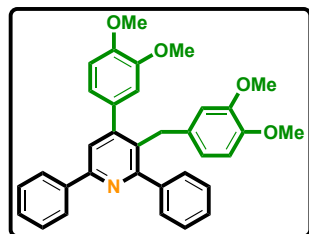

Compound 3n  
<sup>1</sup>H NMR (500 MHz, CDCl<sub>3</sub>) spectra

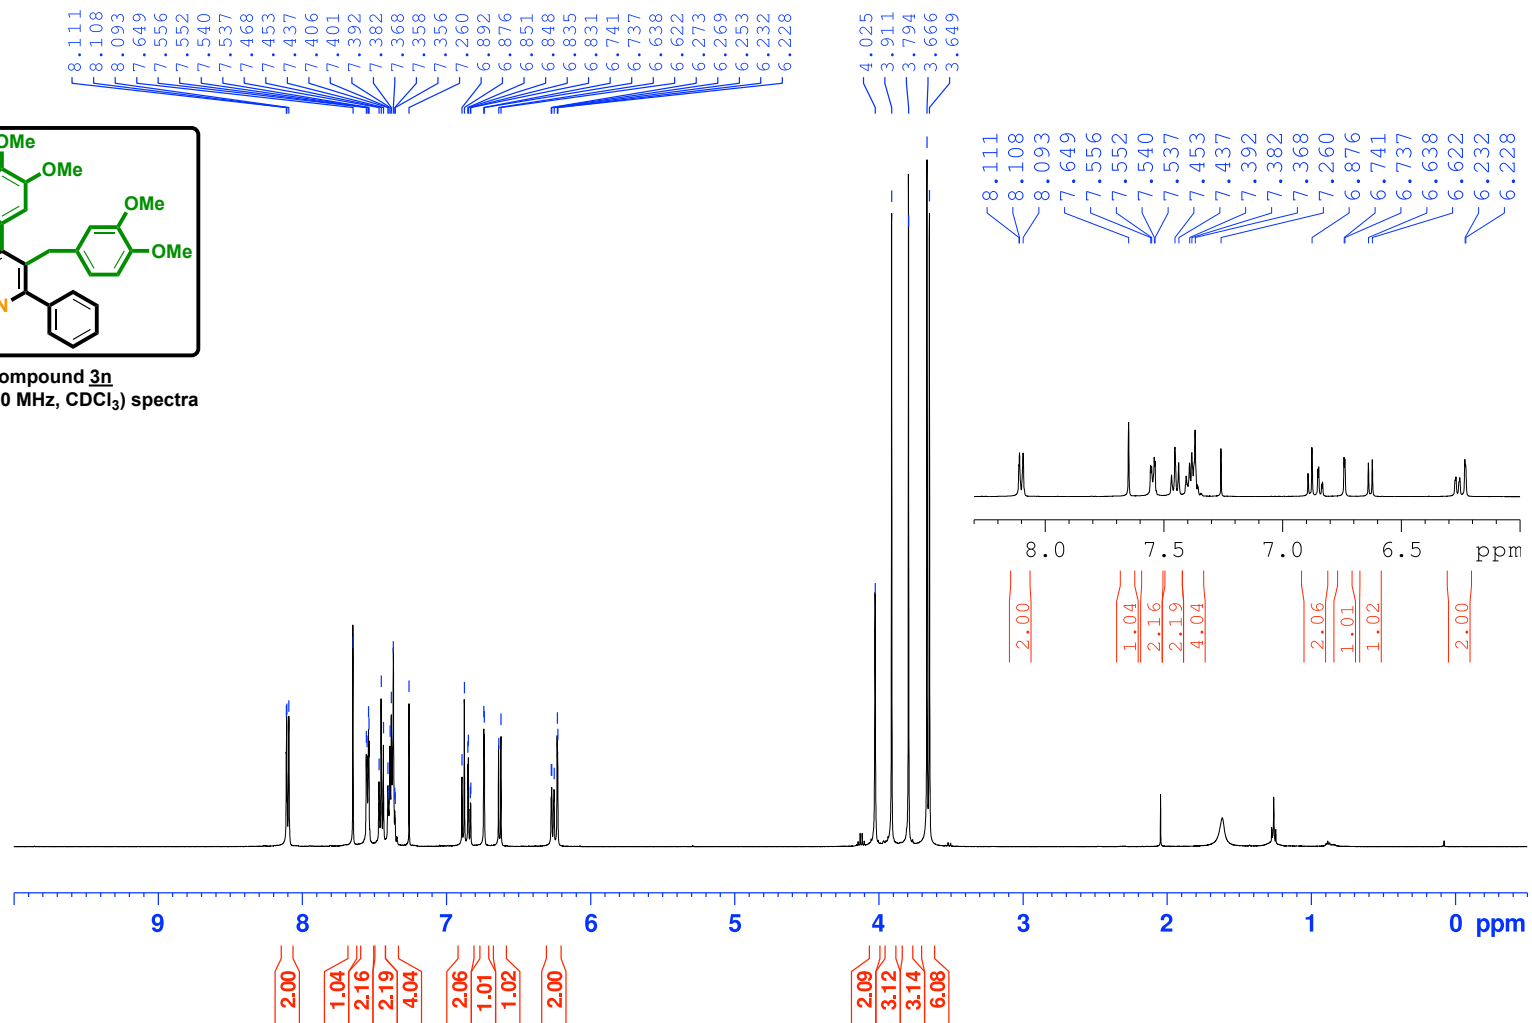

# Compound 3n

13C YHC-446 sep211 212 down 0906

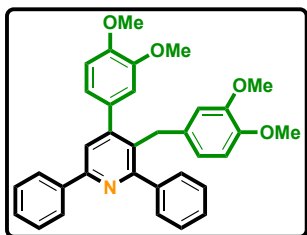

Compound 3n  
<sup>13</sup>C NMR (125 MHz, CDCl<sub>3</sub>) spectra

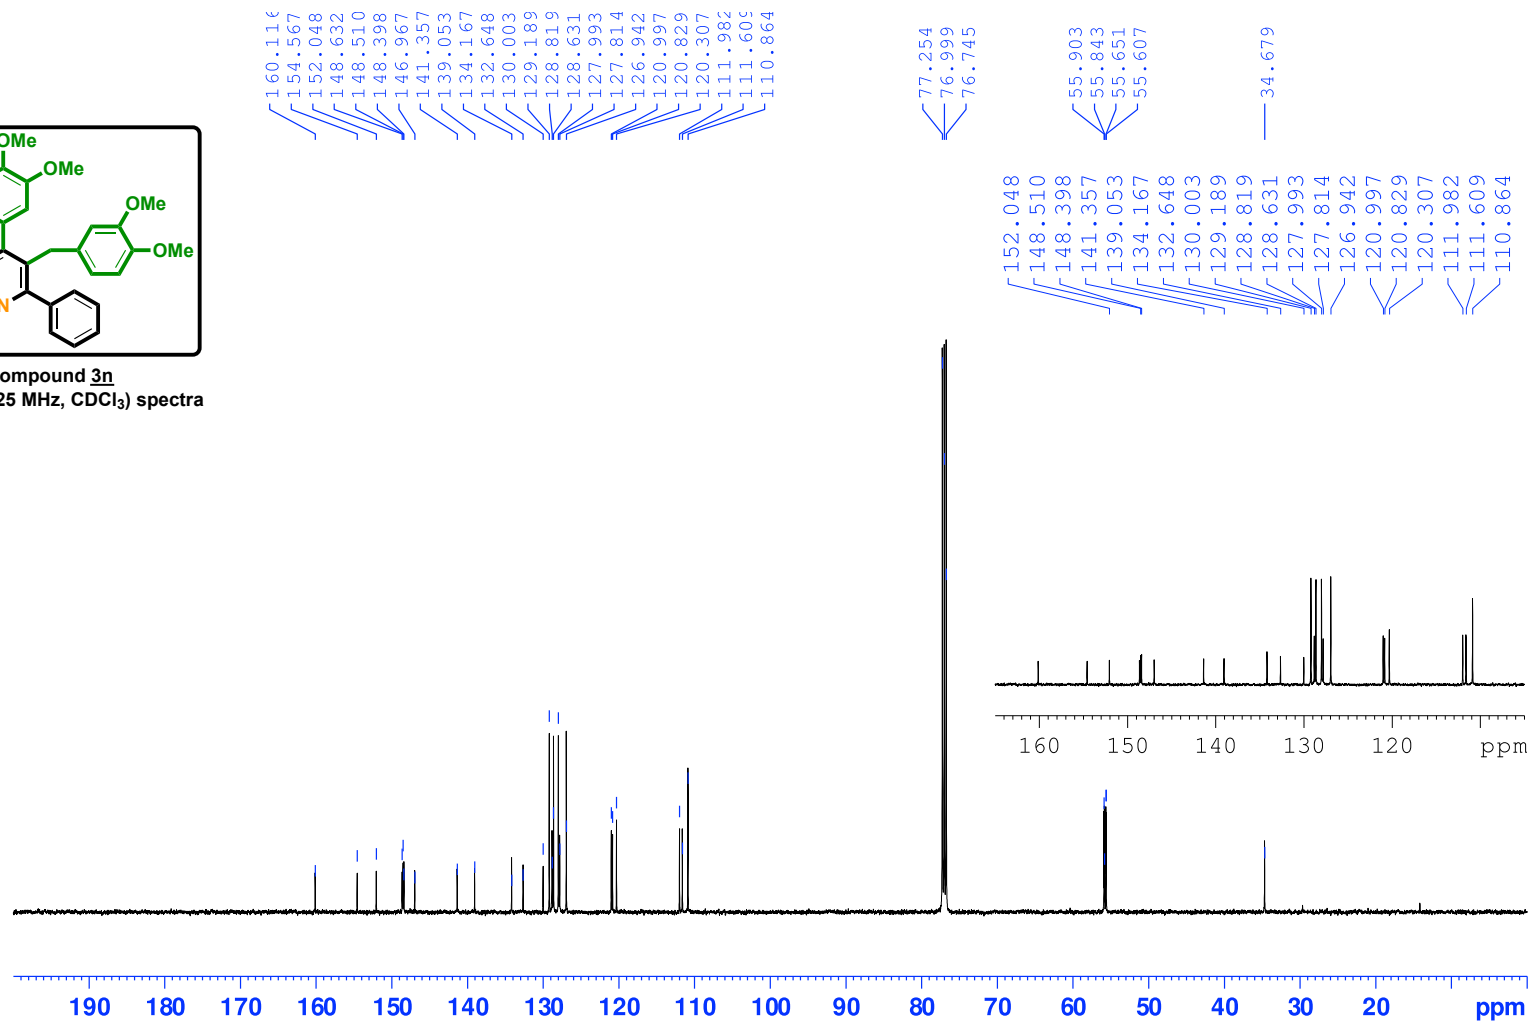

# Compound 2o

1H YHC-436 sep 16-18 top 0626

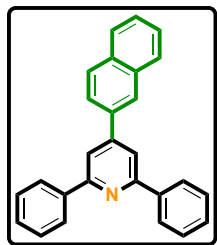

Compound 2o  
<sup>1</sup>H NMR (500 MHz, CDCl<sub>3</sub>) spectra

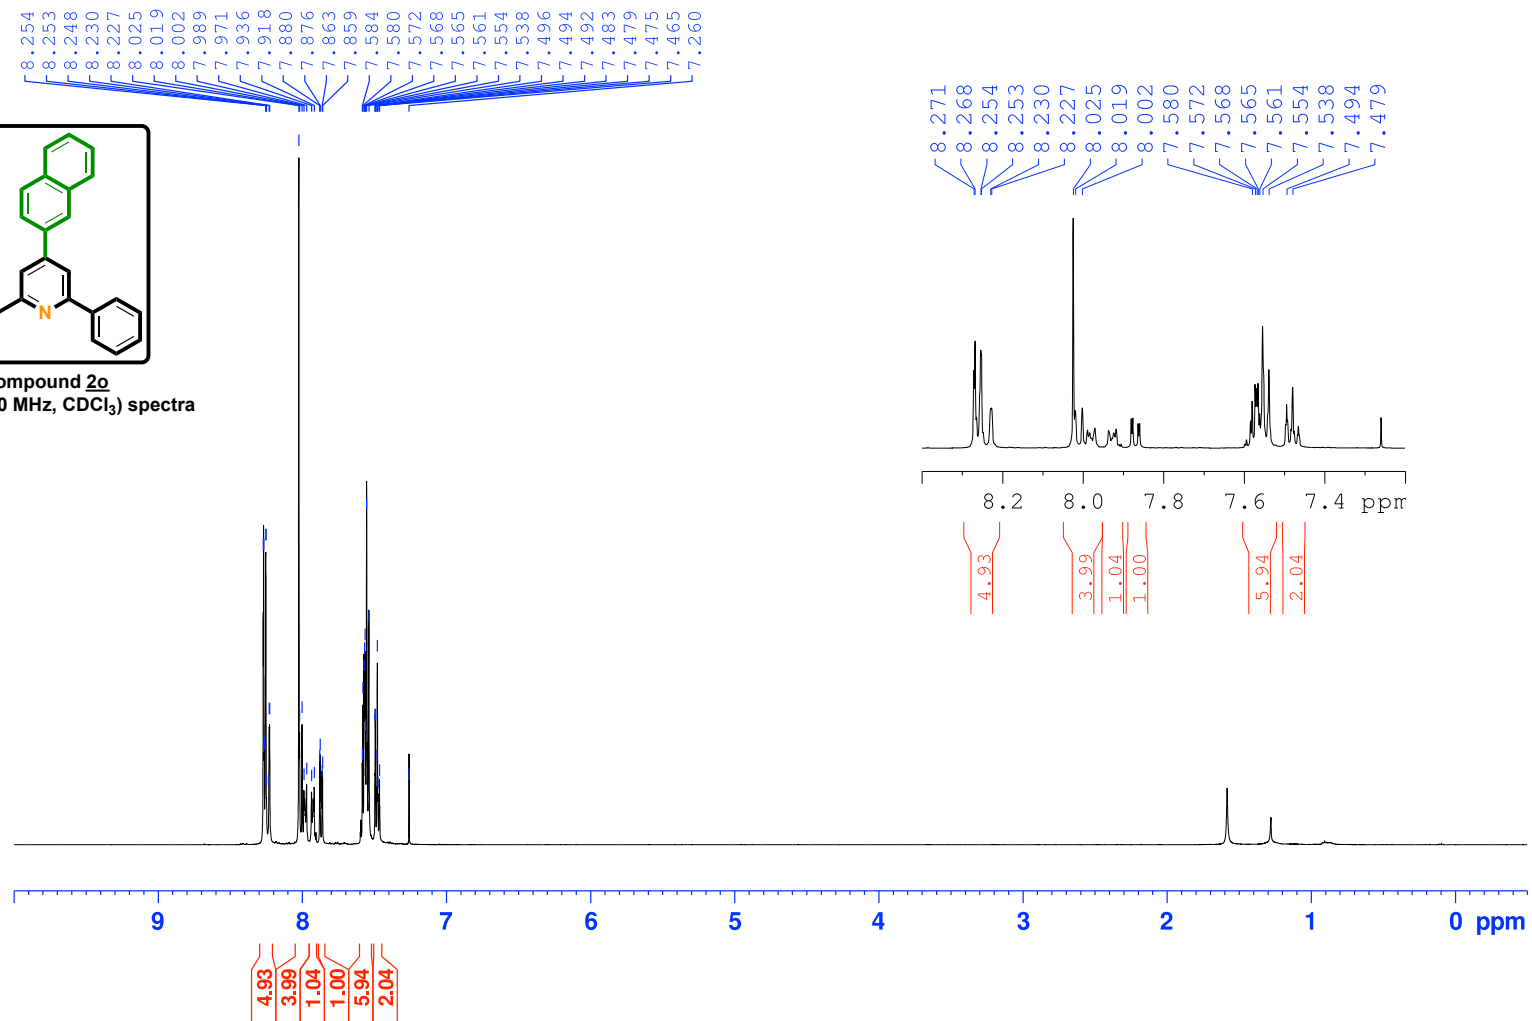

# Compound 2o

13C YHC-436 sep 16-18 top 0626

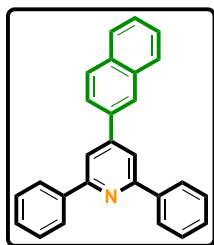

Compound 2o

<sup>13</sup>C NMR (125 MHz, CDCl<sub>3</sub>) spectra

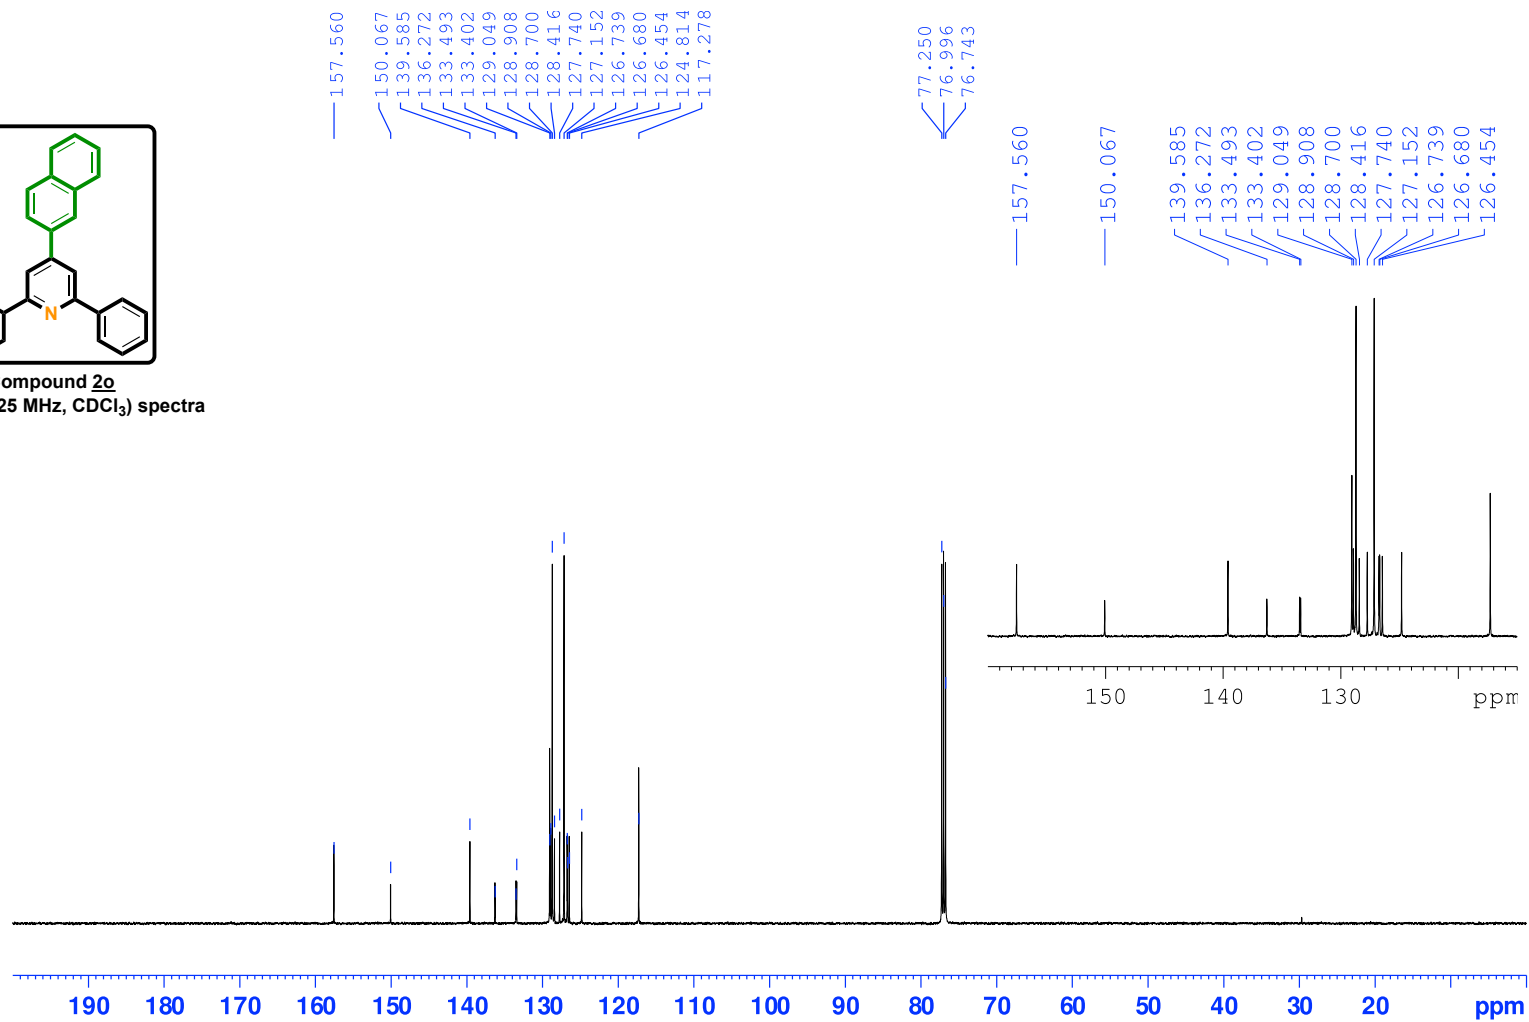

# Compound 2p

1H YHC-437 sep 18-20 top 0706

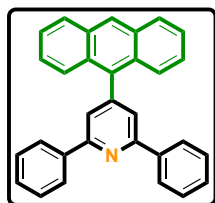

Compound 2p  
<sup>1</sup>H NMR (500 MHz, CDCl<sub>3</sub>) spectra

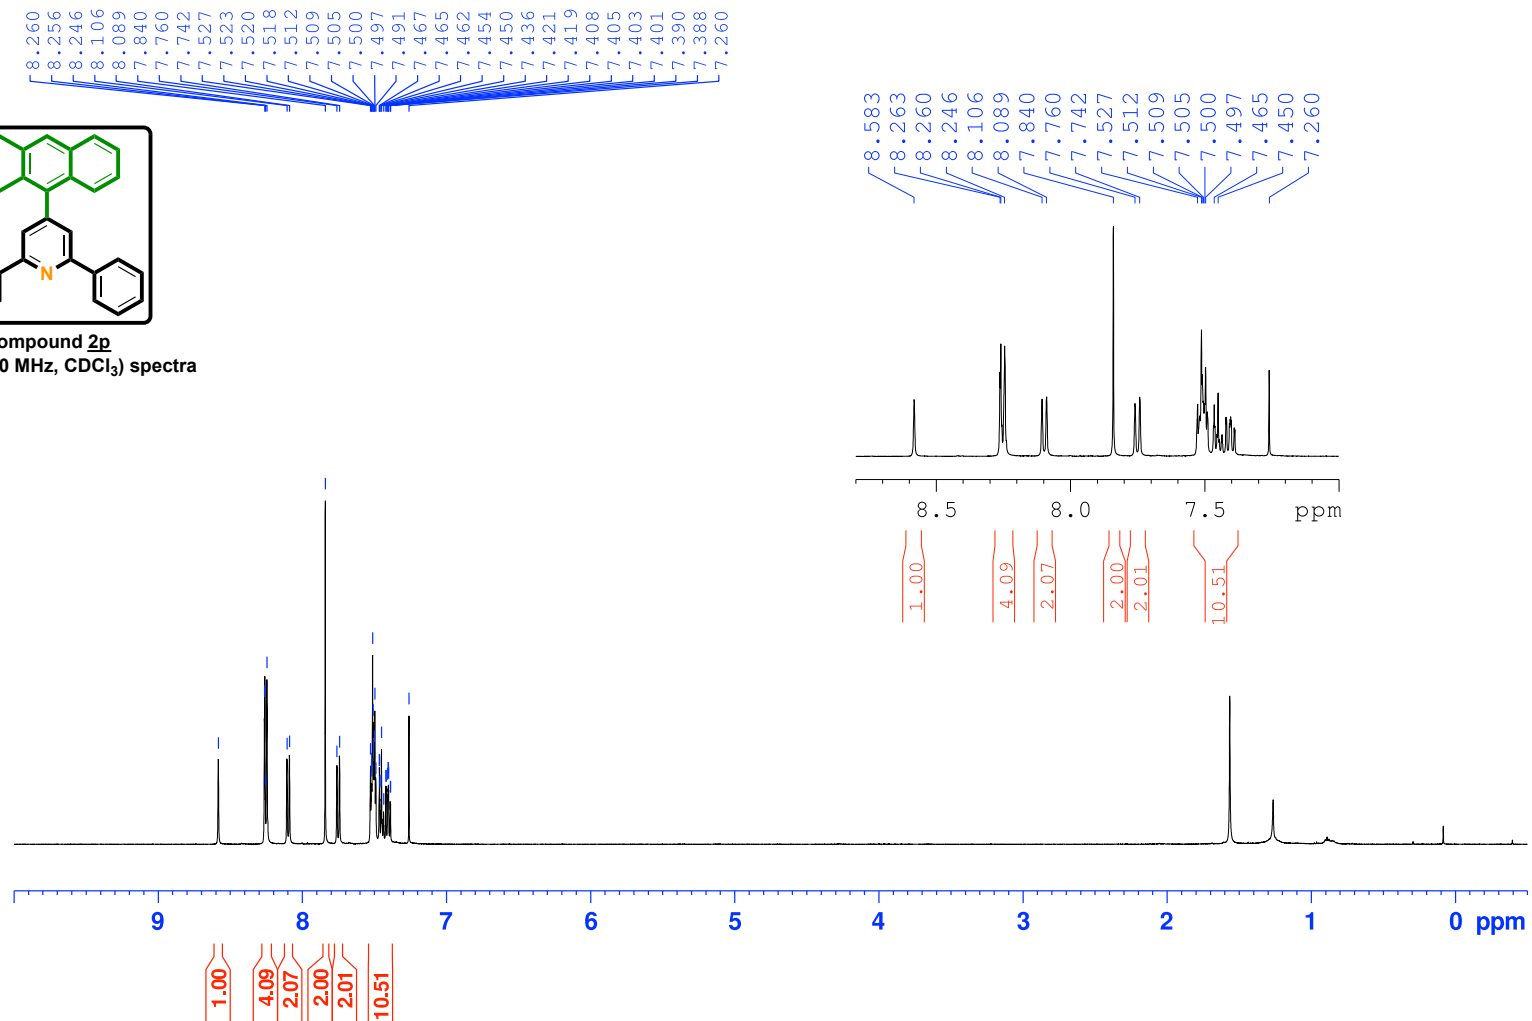



# Compound 2p

13C YHC-437 sep 18-20 top 0706

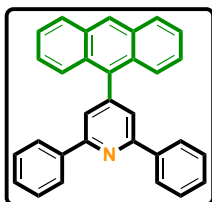

Compound 2p  
<sup>13</sup>C NMR (125 MHz, CDCl<sub>3</sub>) spectra

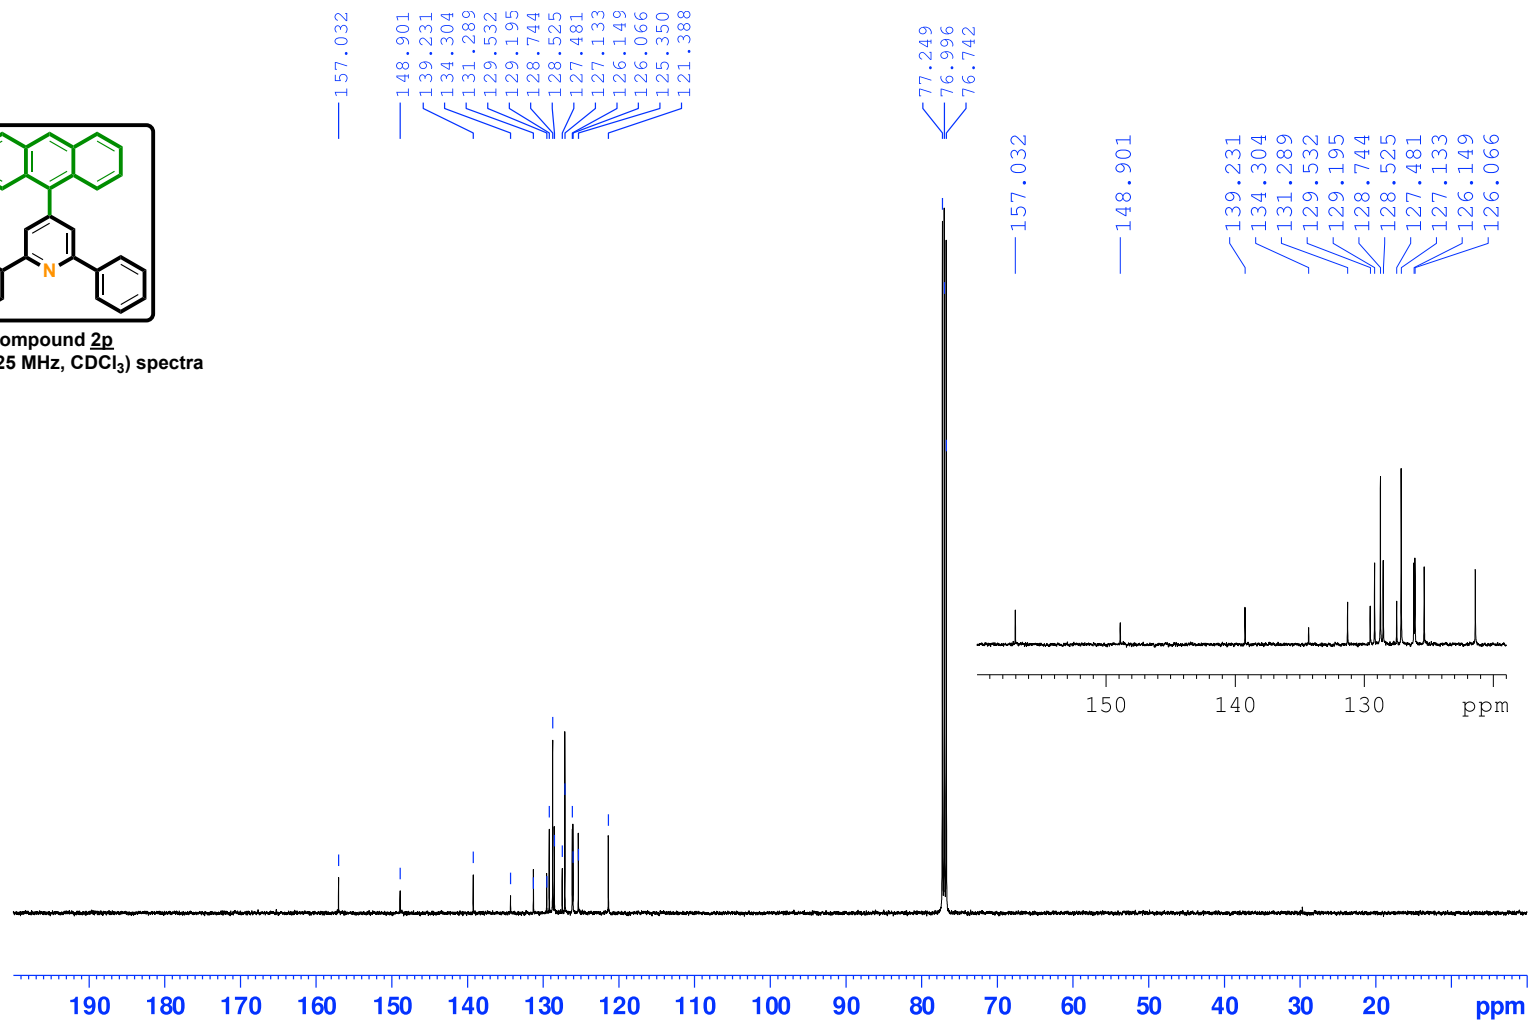

# Compound 2q

1H YHC-430-2 sep 3334 0513

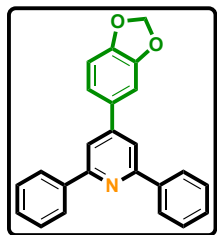

Compound 2q

<sup>1</sup>H NMR (500 MHz, CDCl<sub>3</sub>) spectra

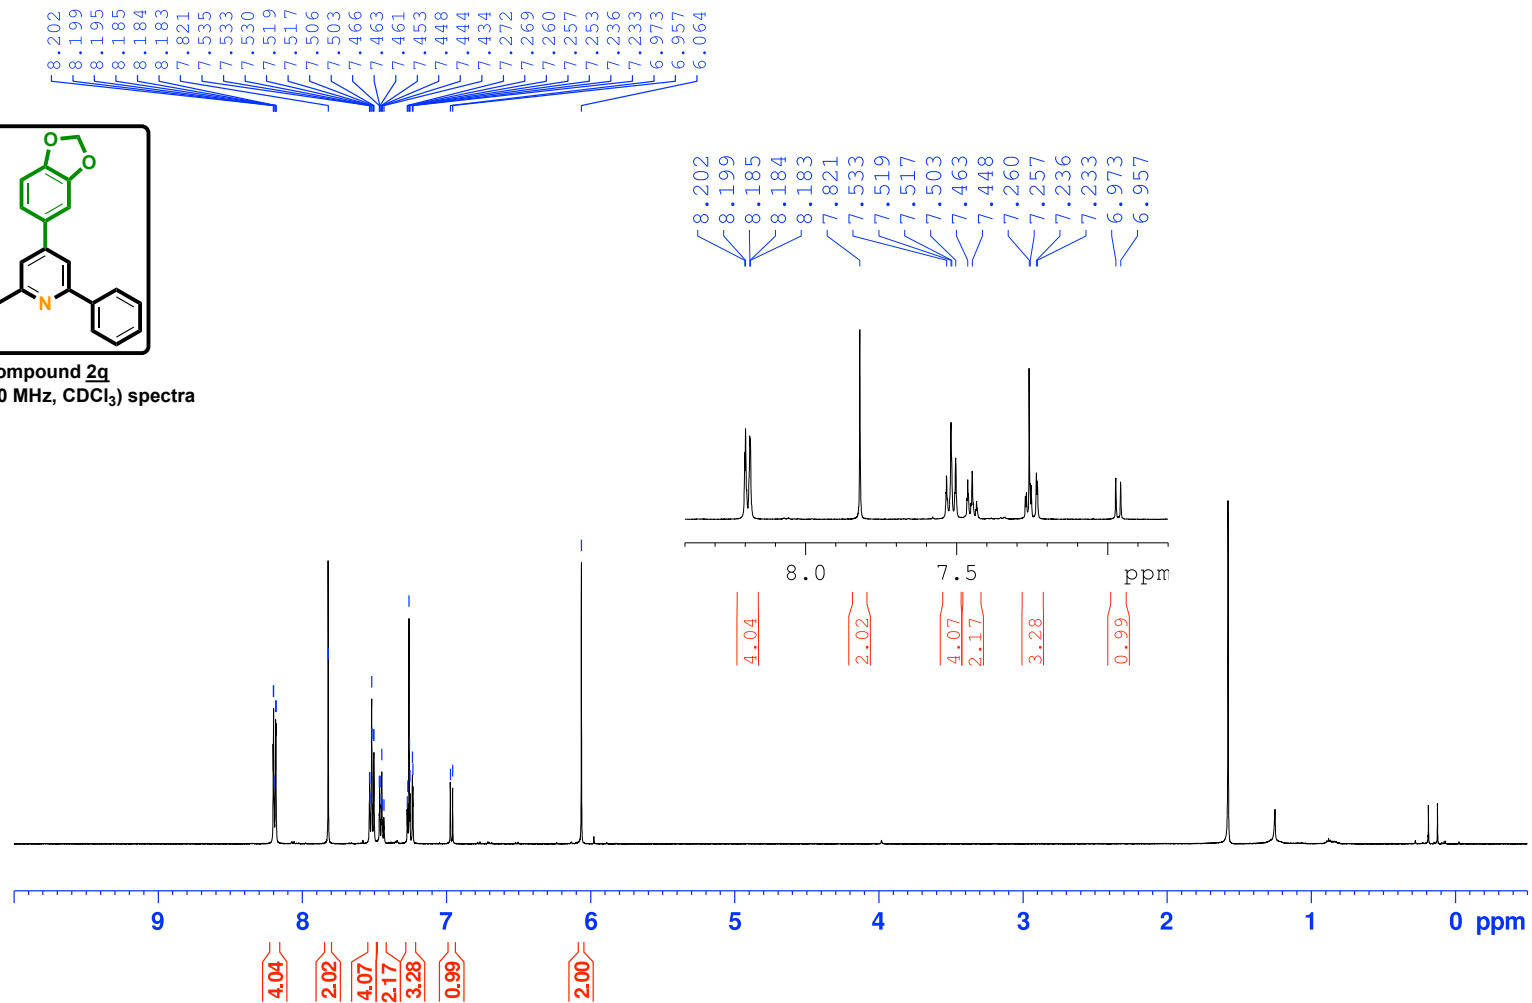

# Compound 2q

13C YHC-430-2 sep 3334 0513

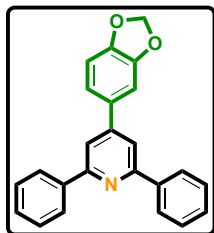

Compound 2q  
<sup>13</sup>C NMR (125 MHz, CDCl<sub>3</sub>) spectra

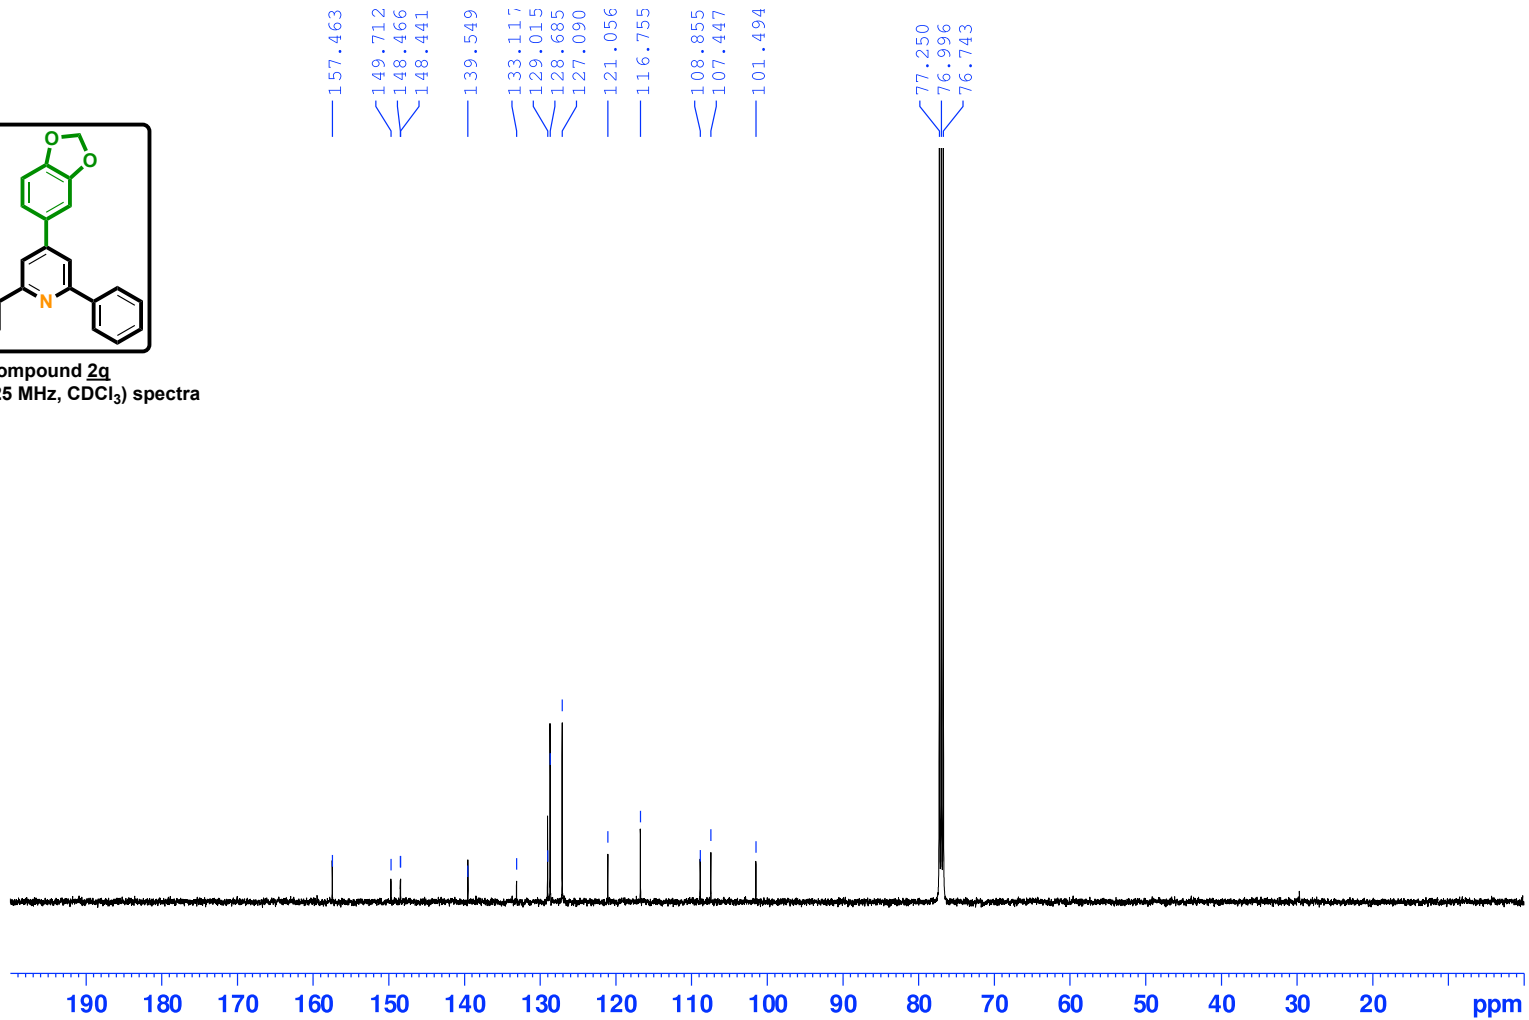

# Compound 2r

1H YHC-303 tmsotf data 0329

8.195  
8.192  
8.184  
8.178  
8.171  
8.167  
7.829  
7.817  
7.745  
7.742  
7.738  
7.726  
7.560  
7.557  
7.554  
7.543  
7.528  
7.508  
7.506  
7.494  
7.260  
7.226  
7.220  
7.216  
7.202  
7.189  
7.185

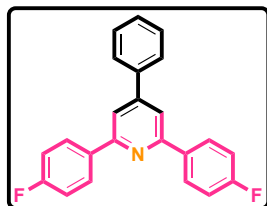

Compound 2r  
<sup>1</sup>H NMR (500 MHz, CDCl<sub>3</sub>) spectra

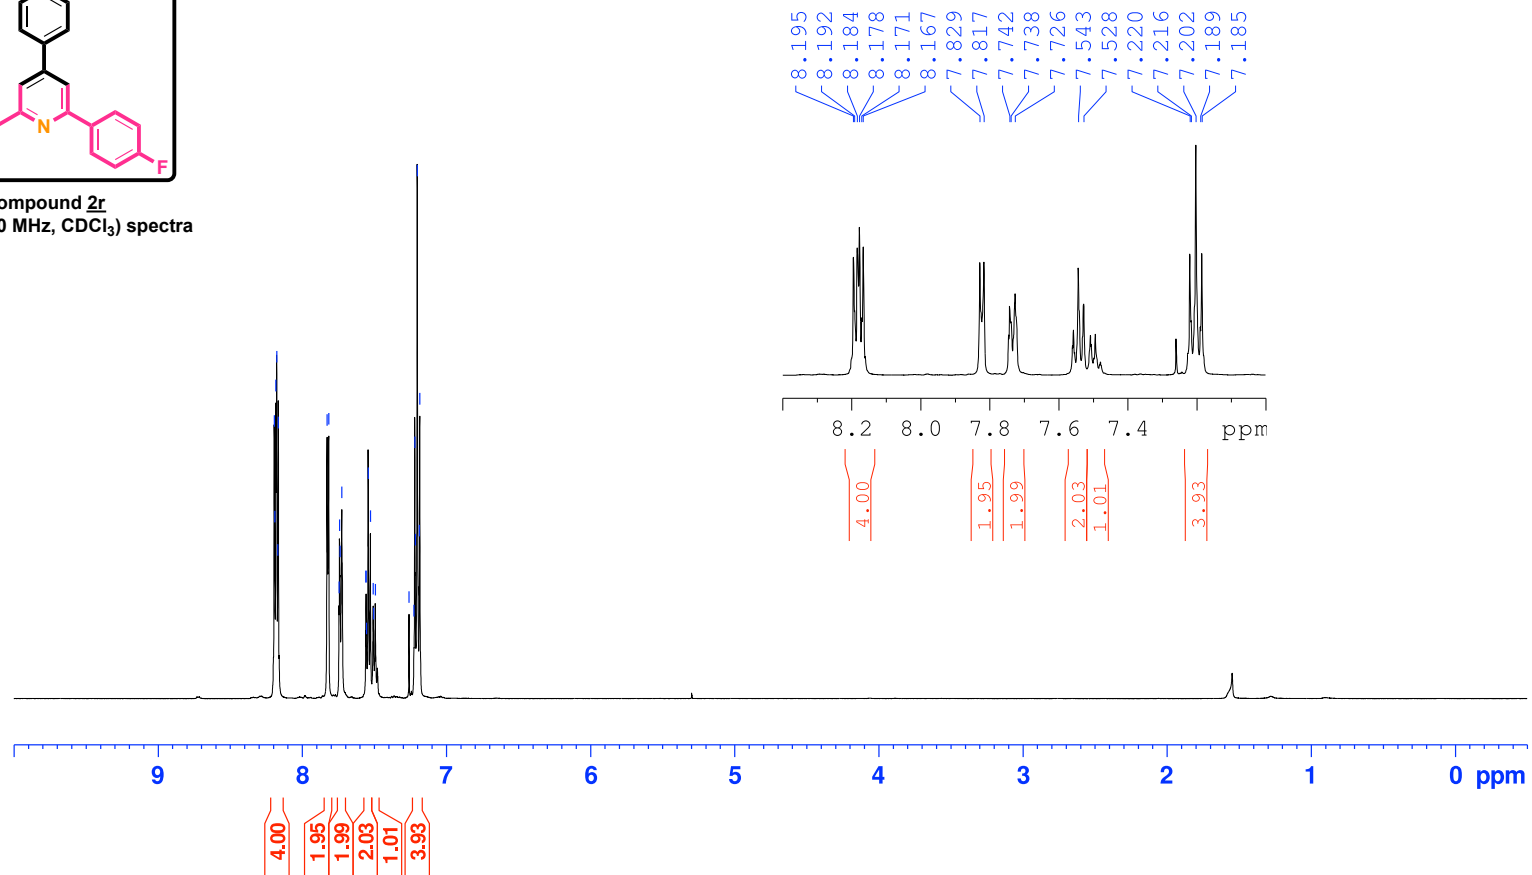

# Compound 2r

13C YHC-303 tmsotf data 0329

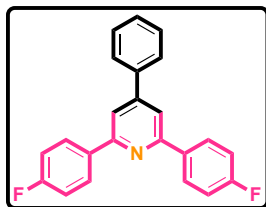

Compound 2r  
<sup>13</sup>C NMR (125 MHz, CDCl<sub>3</sub>) spectra

164.630  
162.653  
156.463  
150.436  
138.836  
135.581  
135.559  
129.149  
129.109  
128.917  
128.852  
127.143  
116.670  
115.703  
115.532

77.250  
76.996  
76.742

162.653  
156.463  
150.436

138.836  
135.581  
135.559  
129.149  
129.109  
128.917  
128.852  
127.143  
116.670  
115.703  
115.532

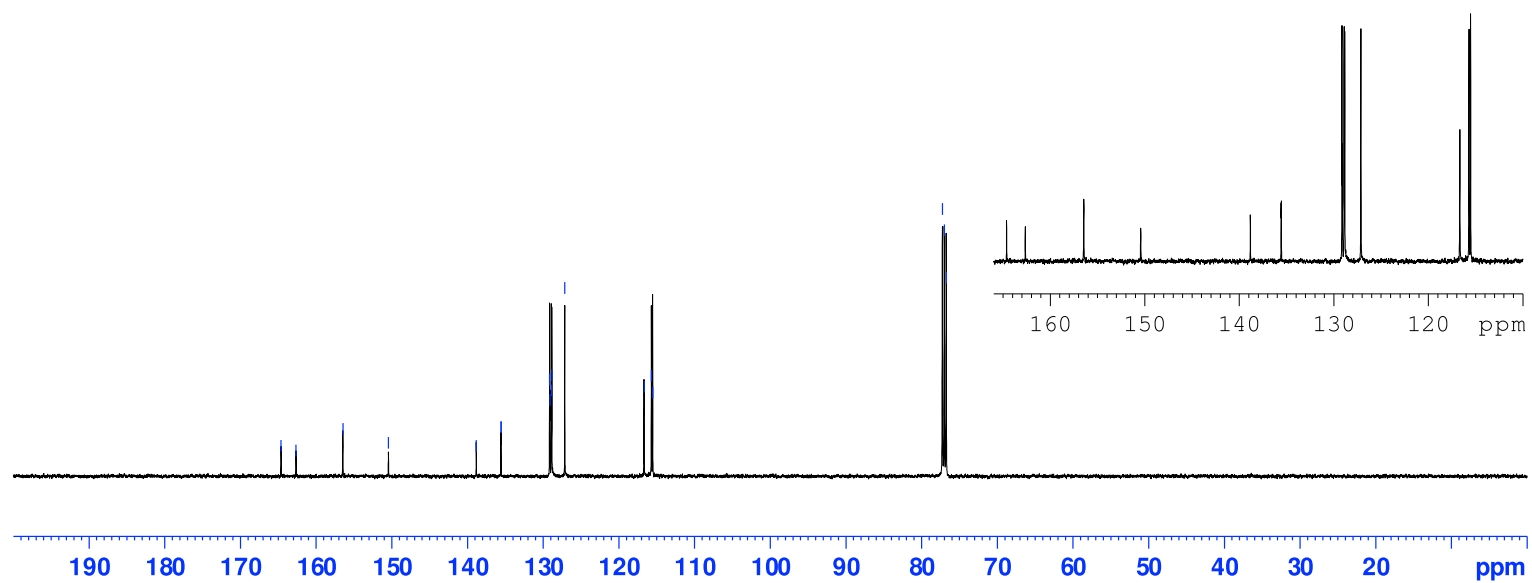

# Compound 3r

1H YHC-454 sep 4546 down 1008

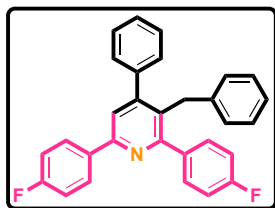

Compound 3r  
<sup>1</sup>H NMR (500 MHz, CDCl<sub>3</sub>) spectra

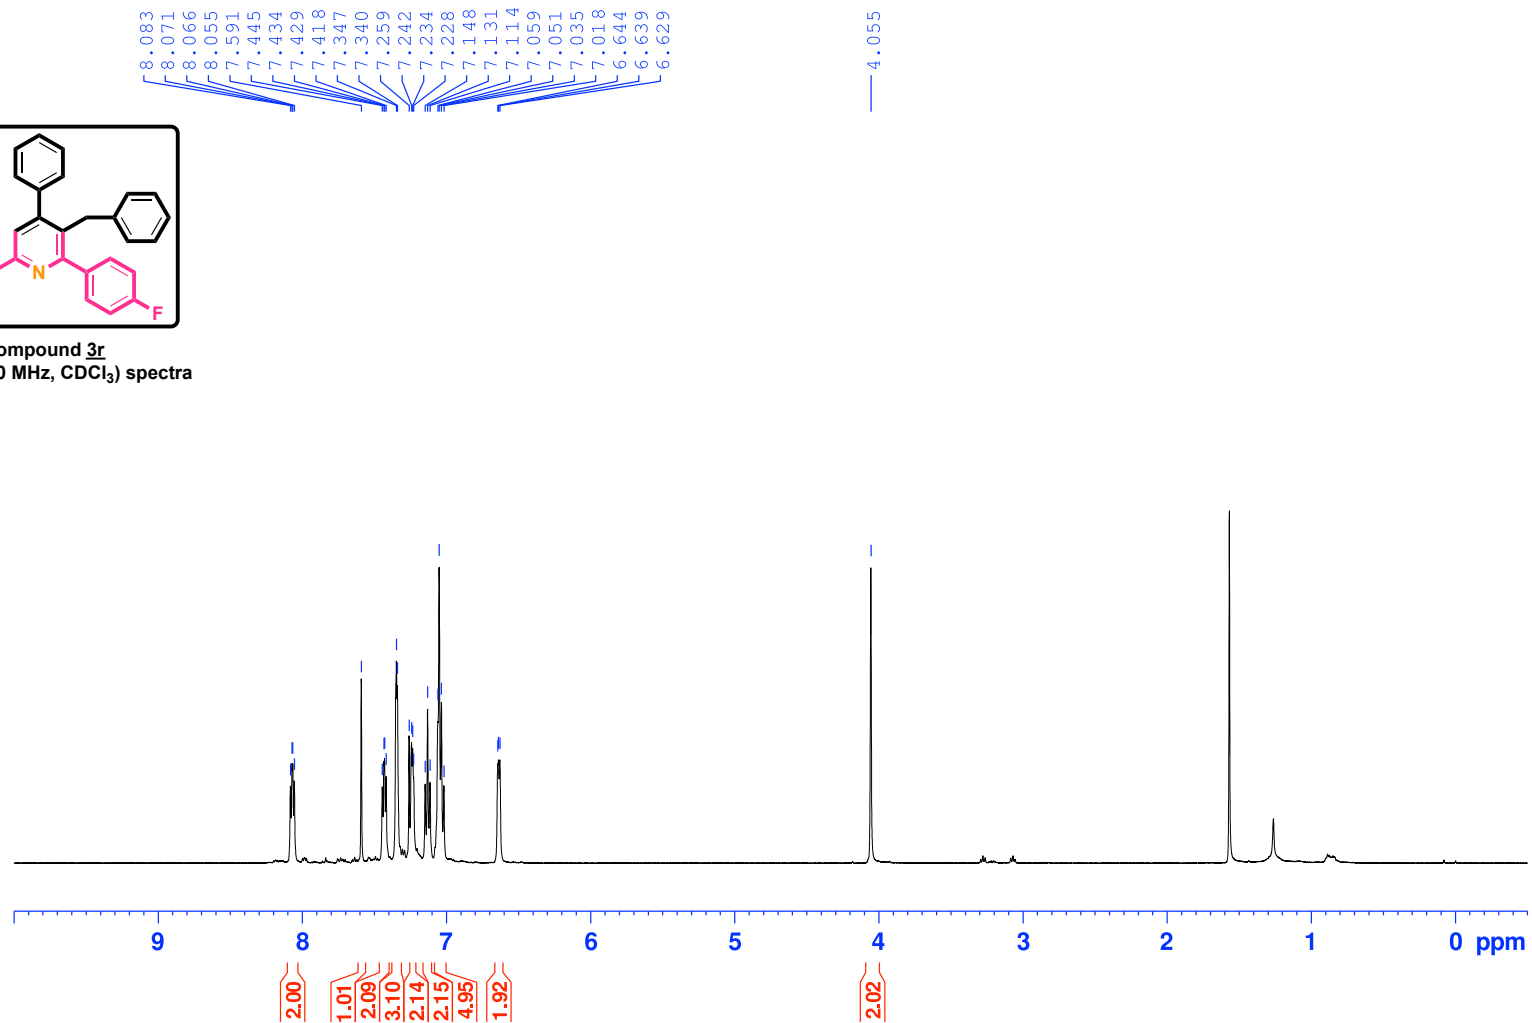

# Compound 3r

13C YHC-454 sep 4546 down 1008

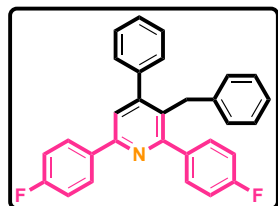

Compound 3r  
<sup>13</sup>C NMR (125 MHz, CDCl<sub>3</sub>) spectra

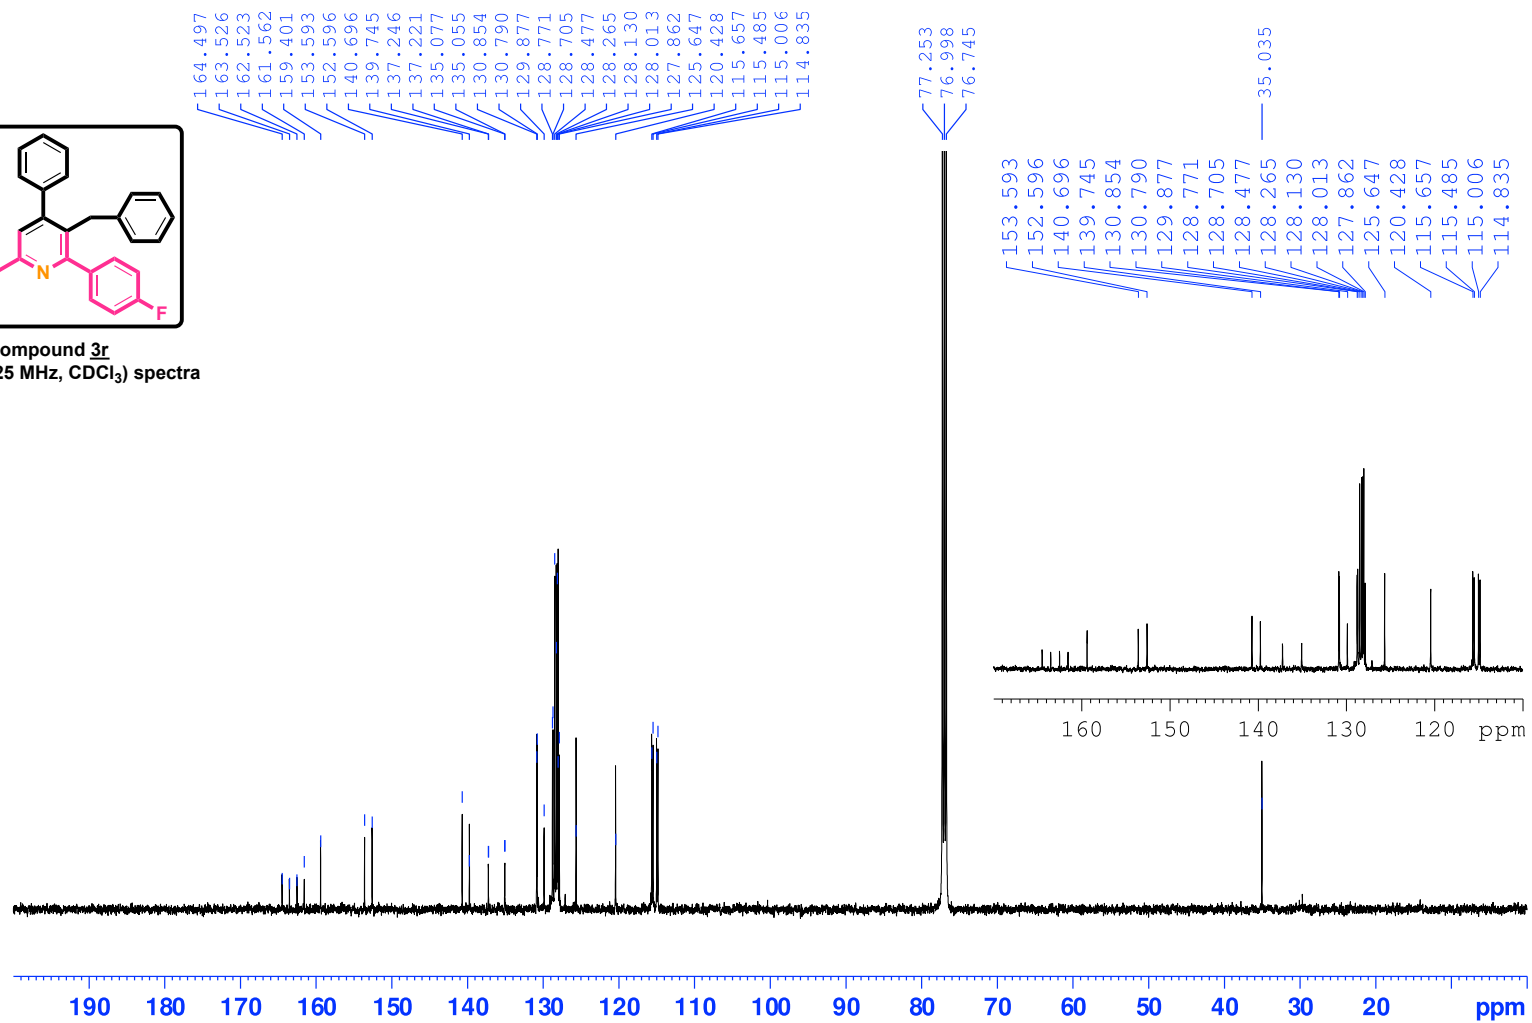

# Compound 2s

1H YHC-304 tmsotf recrystal 0325

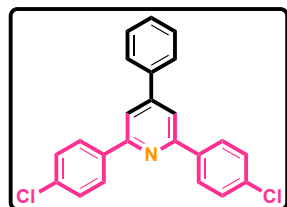

Compound 2s  
<sup>1</sup>H NMR (500 MHz, CDCl<sub>3</sub>) spectra

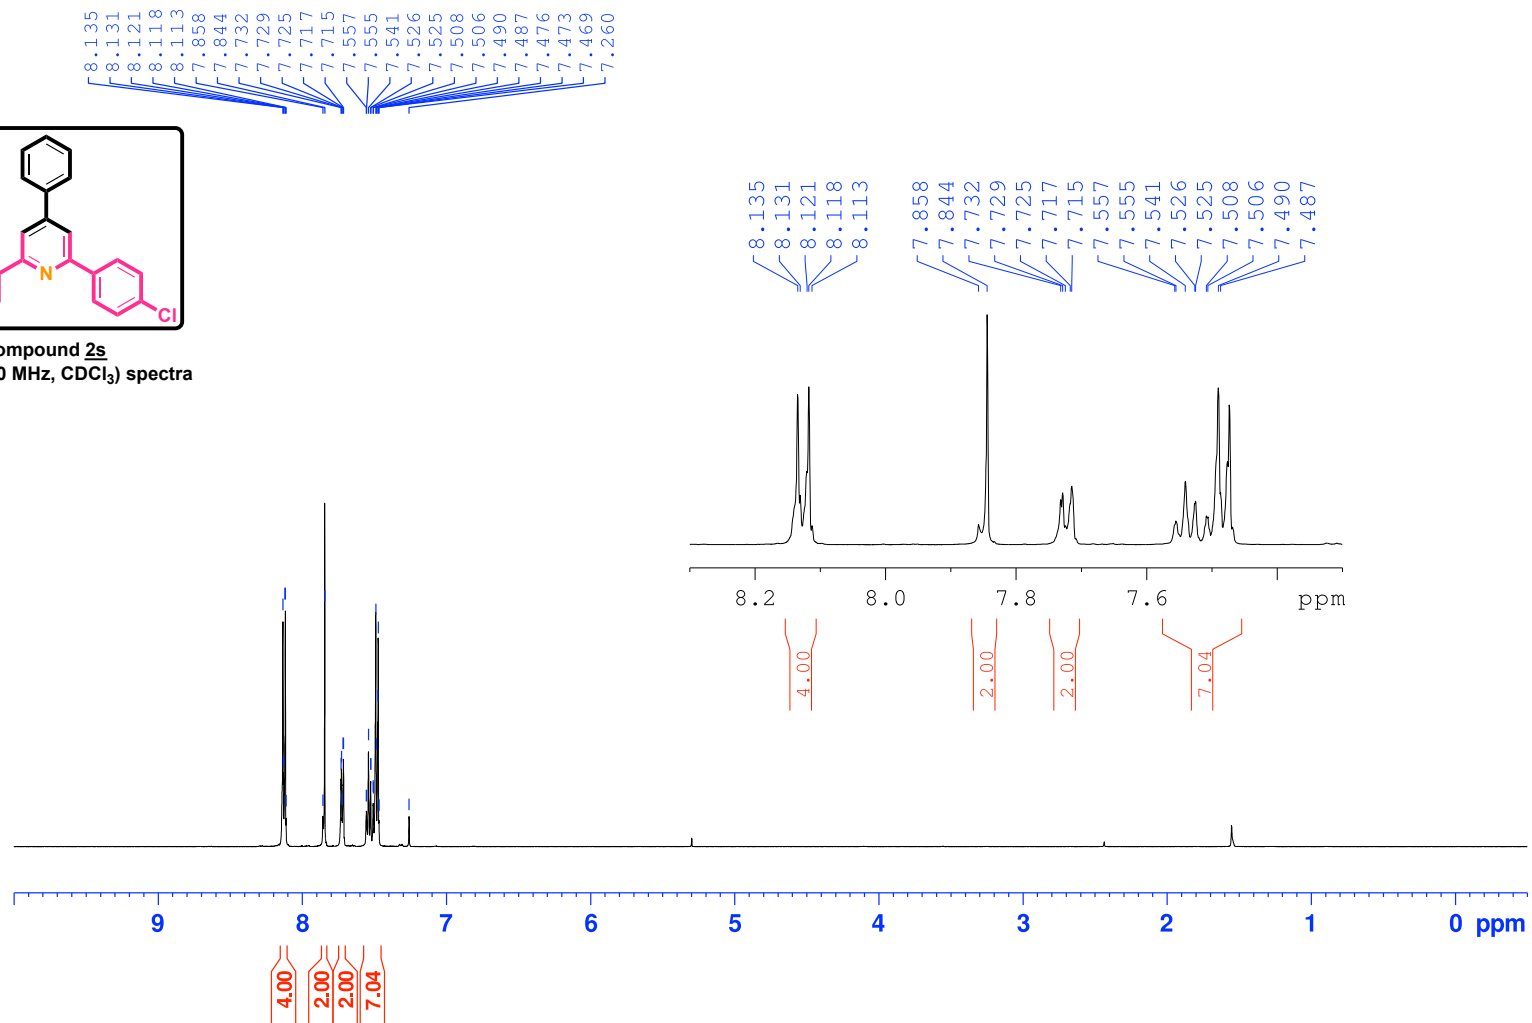



# Compound 2s

13C YHC-304 tmsotf recrystal 0325

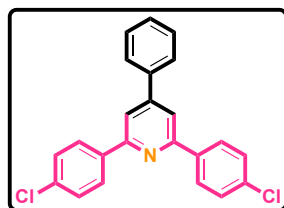

Compound 2s

<sup>13</sup>C NMR (125 MHz, CDCl<sub>3</sub>) spectra

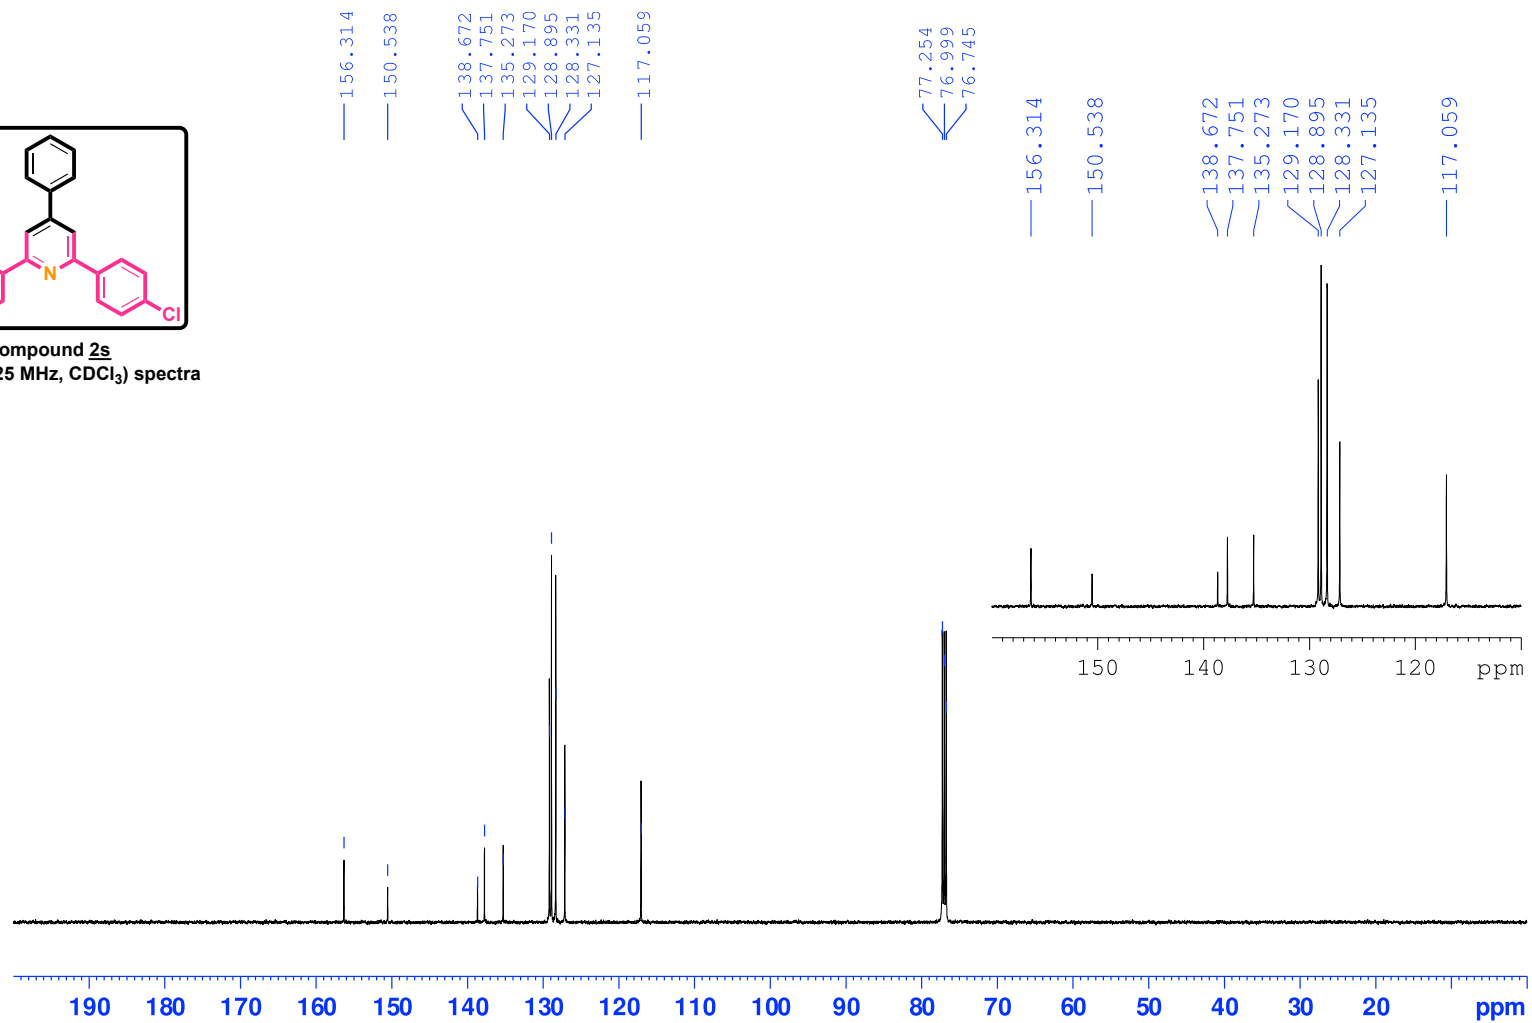

# Compound 3s

1H YHC-455 sep 14-18 down 1021

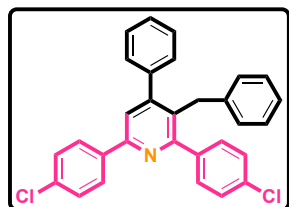

Compound 3s

<sup>1</sup>H NMR (500 MHz, CDCl<sub>3</sub>) spectra

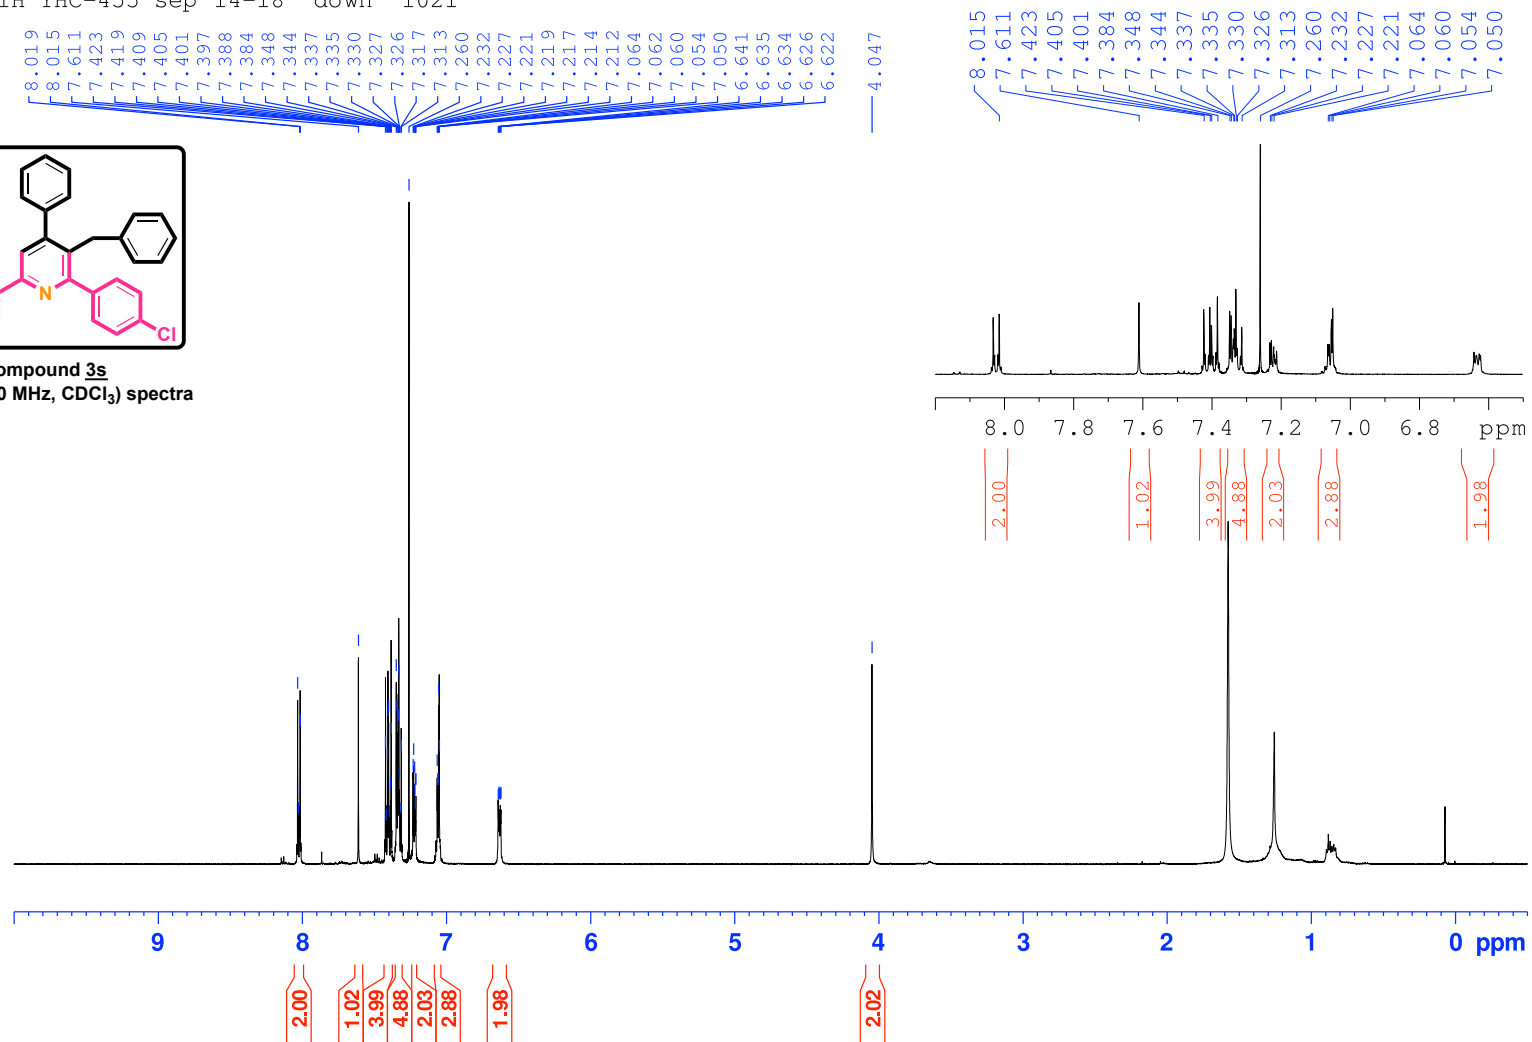

# Compound 3s

13C YHC-455 sep 14-18 down 1021

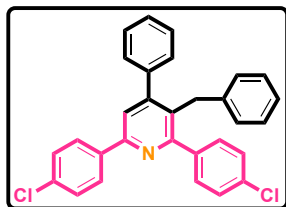

Compound 3s

<sup>13</sup>C NMR (125 MHz, CDCl<sub>3</sub>) spectra

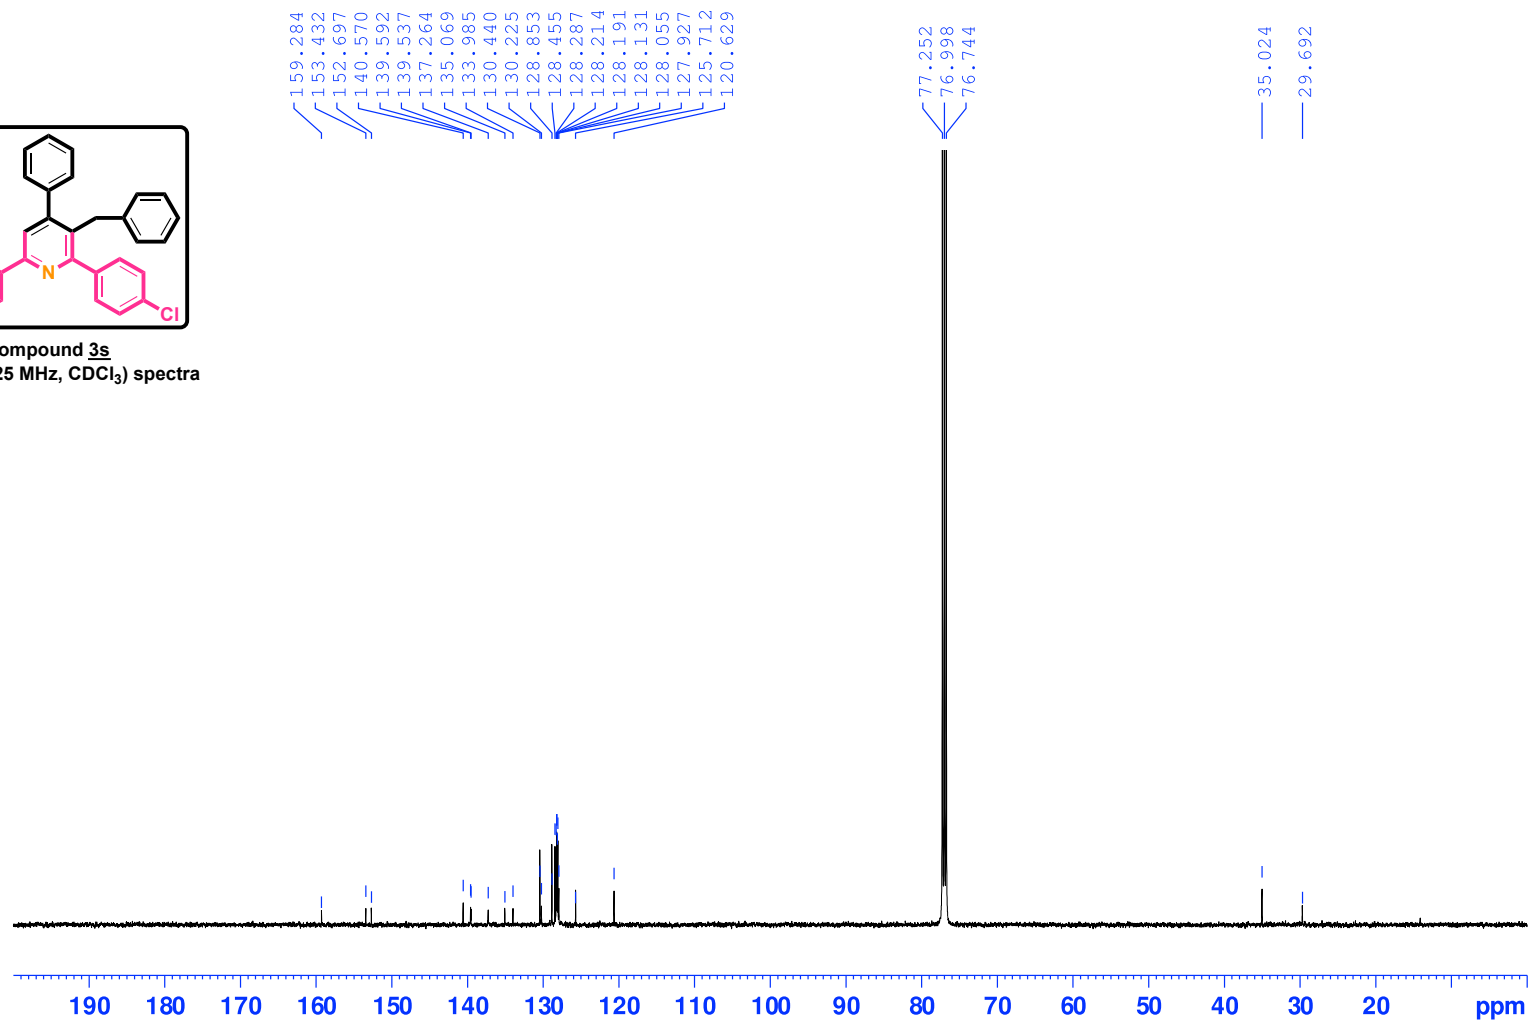

# Compound 2t

1H YHC-302 tmsotf data 0325

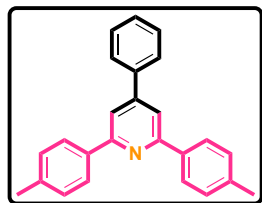

Compound 2t  
<sup>1</sup>H NMR (500 MHz, CDCl<sub>3</sub>) spectra

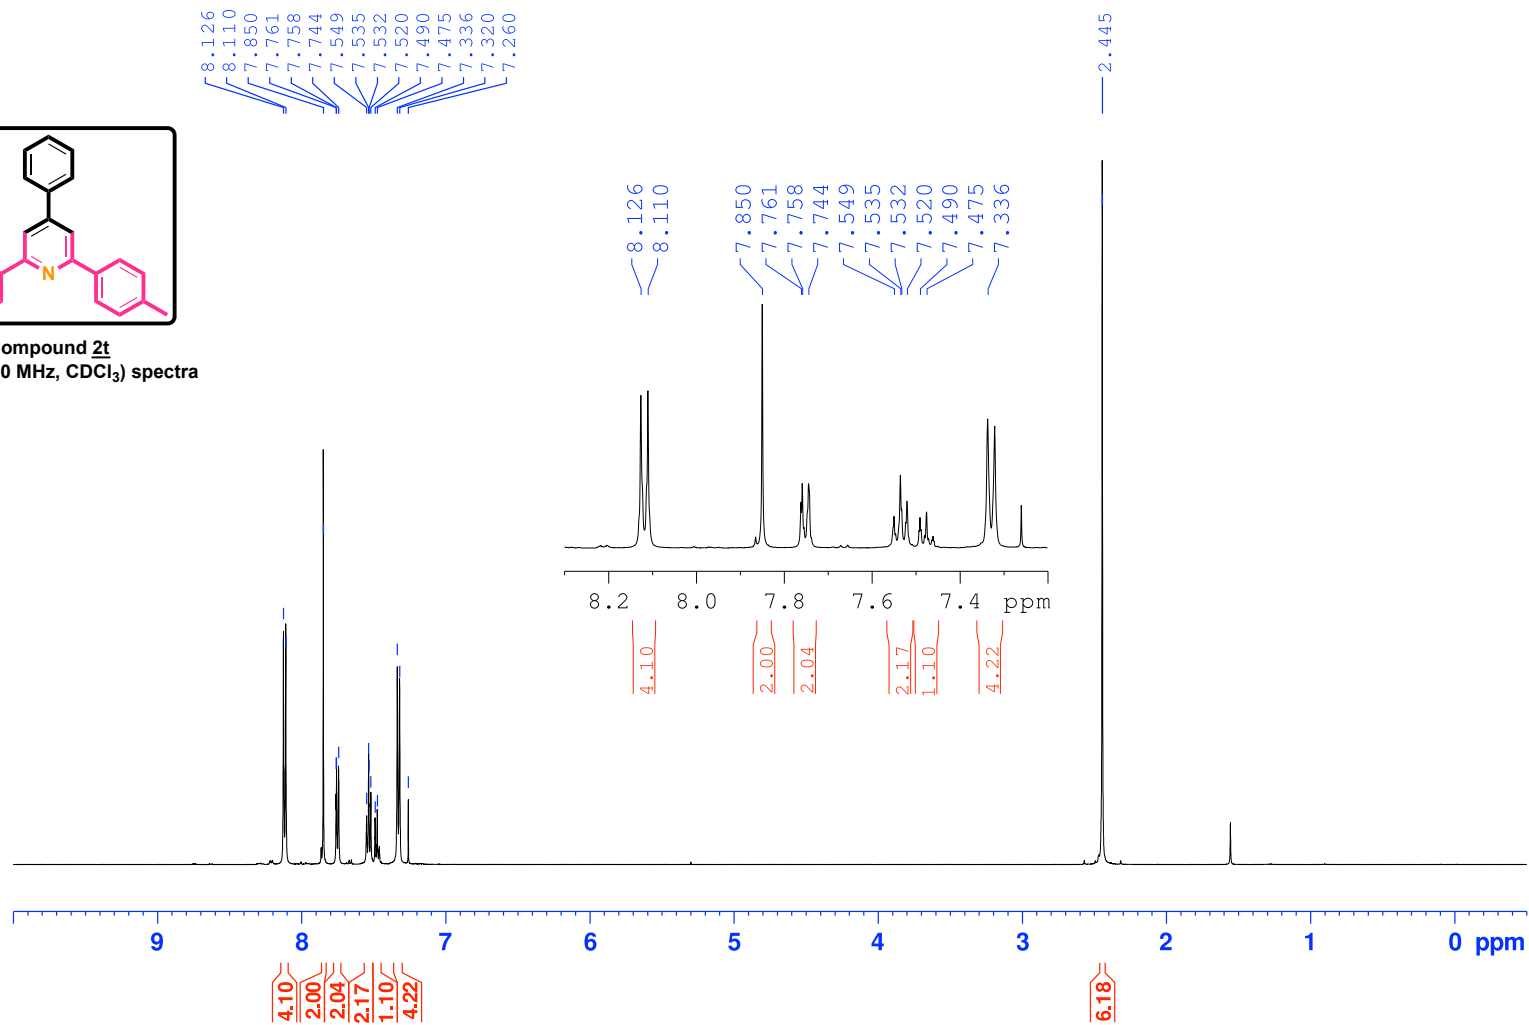

# Compound 2t

<sup>13</sup>C YHC-302 tmsotf data 0325

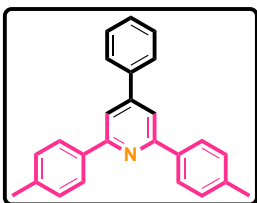

Compound 2t  
<sup>13</sup>C NMR (125 MHz, CDCl<sub>3</sub>) spectra

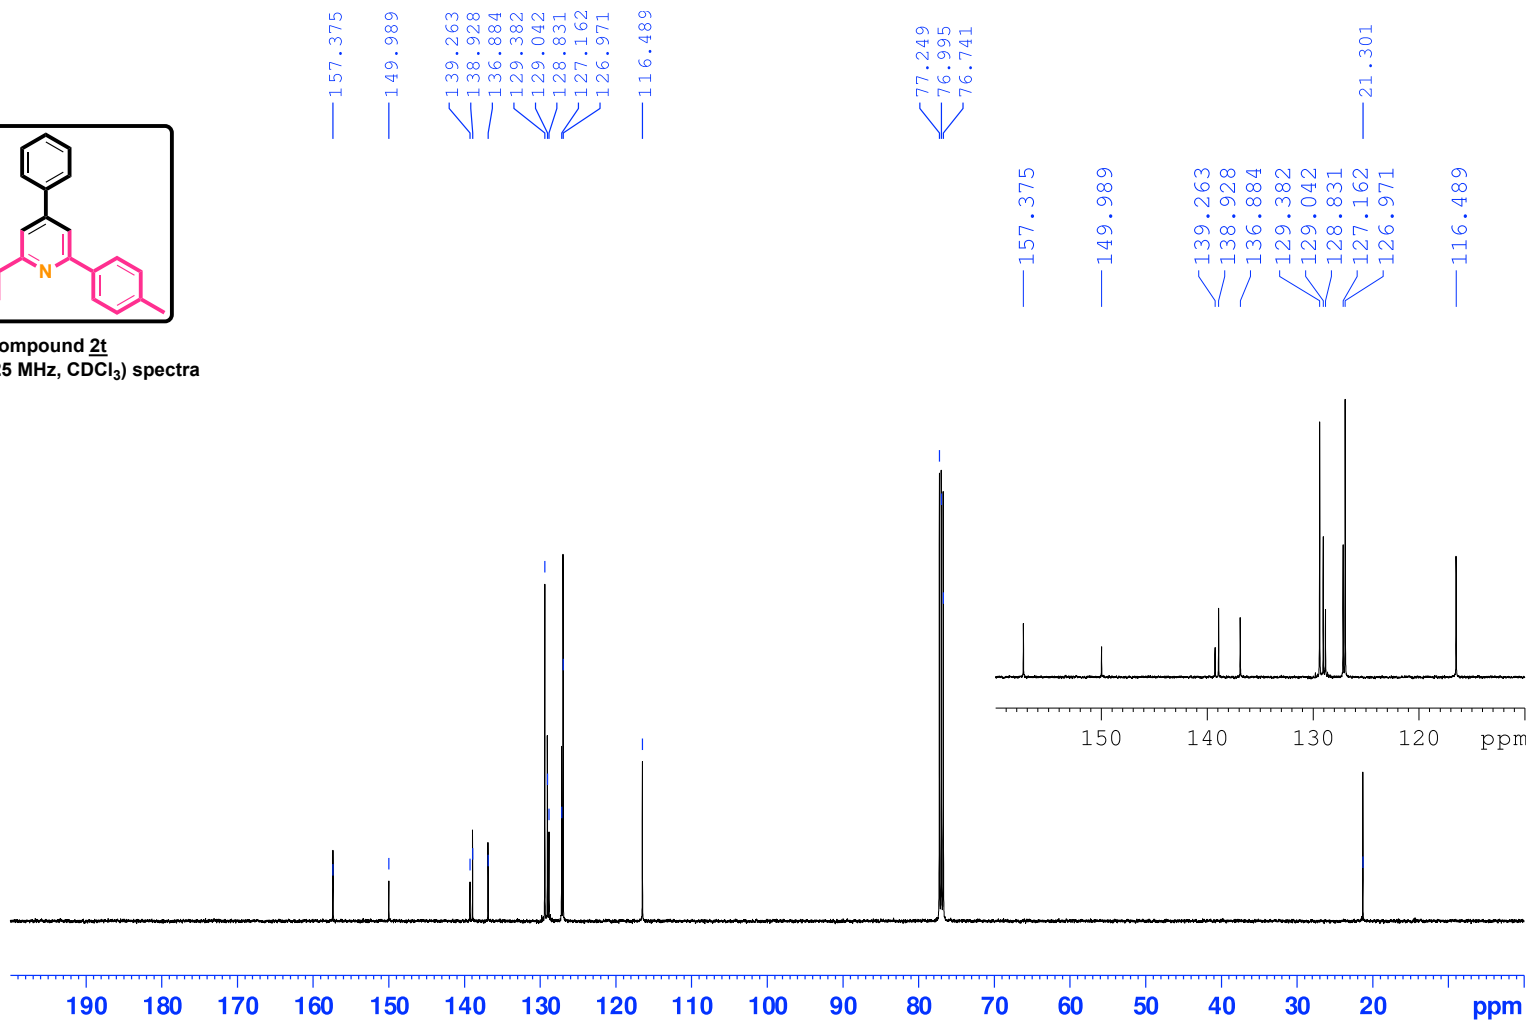

# Compound 3t

1H YHC-452-2 sep 73-75 down 1026

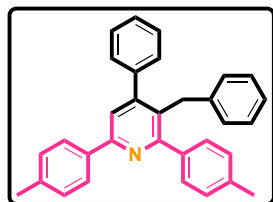

Compound 3t  
<sup>1</sup>H NMR (500 MHz, CDCl<sub>3</sub>) spectra

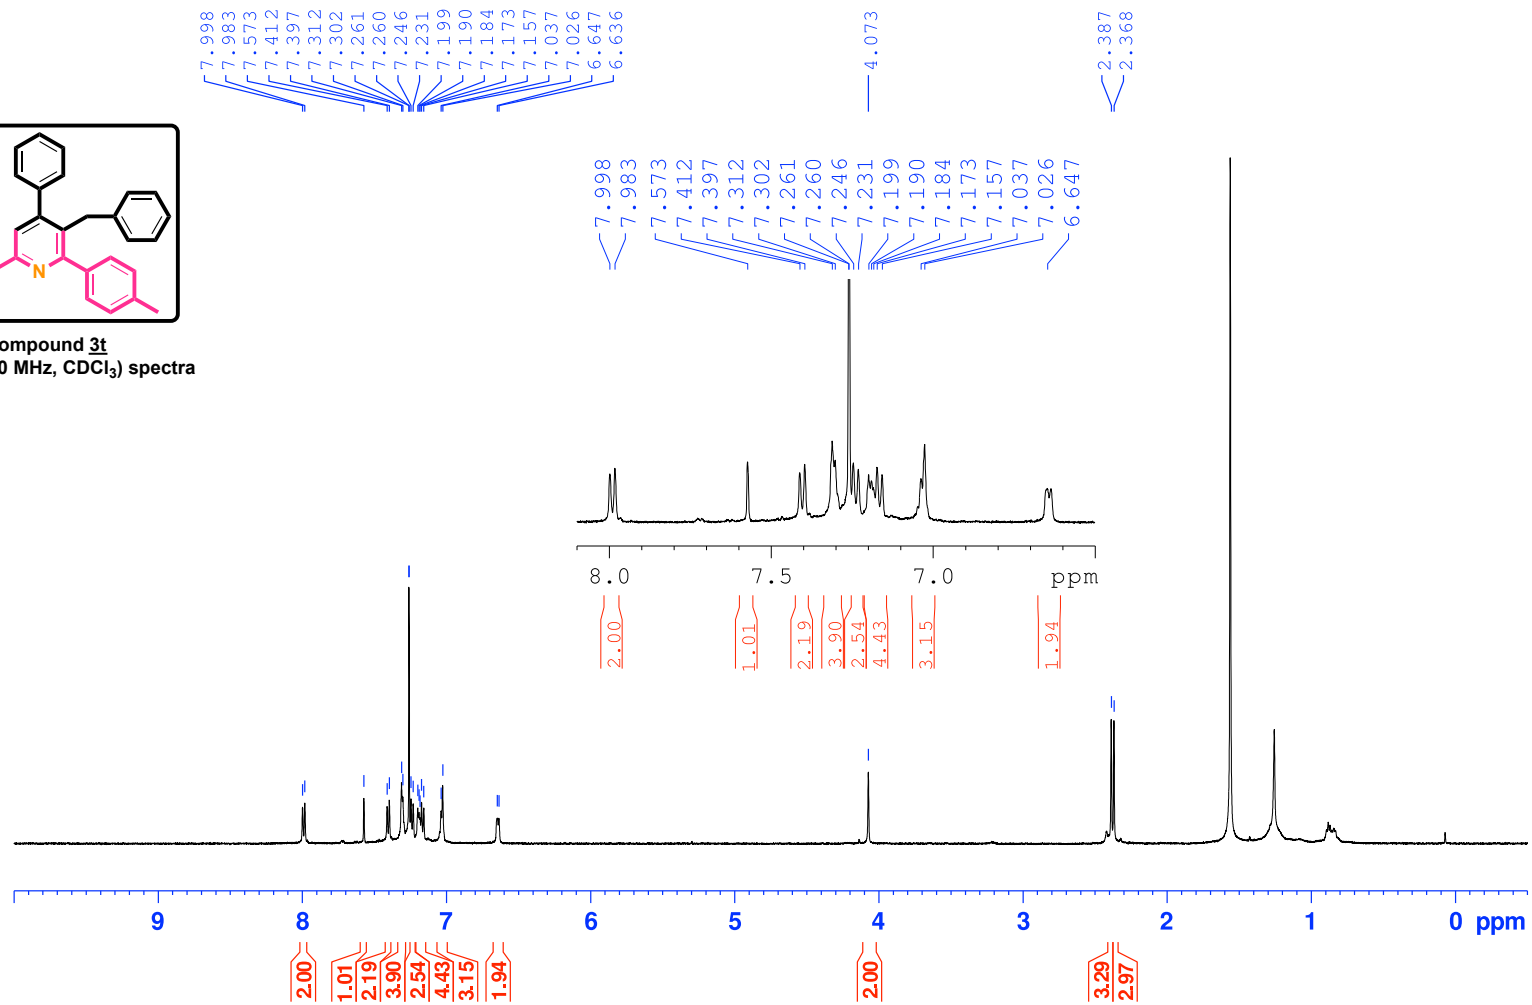

# Compound 3t

13C YHC-452-2 sep 73-75 down 1026

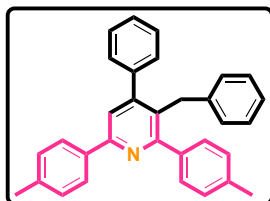

Compound 3t  
<sup>13</sup>C NMR (125 MHz, CDCl<sub>3</sub>) spectra

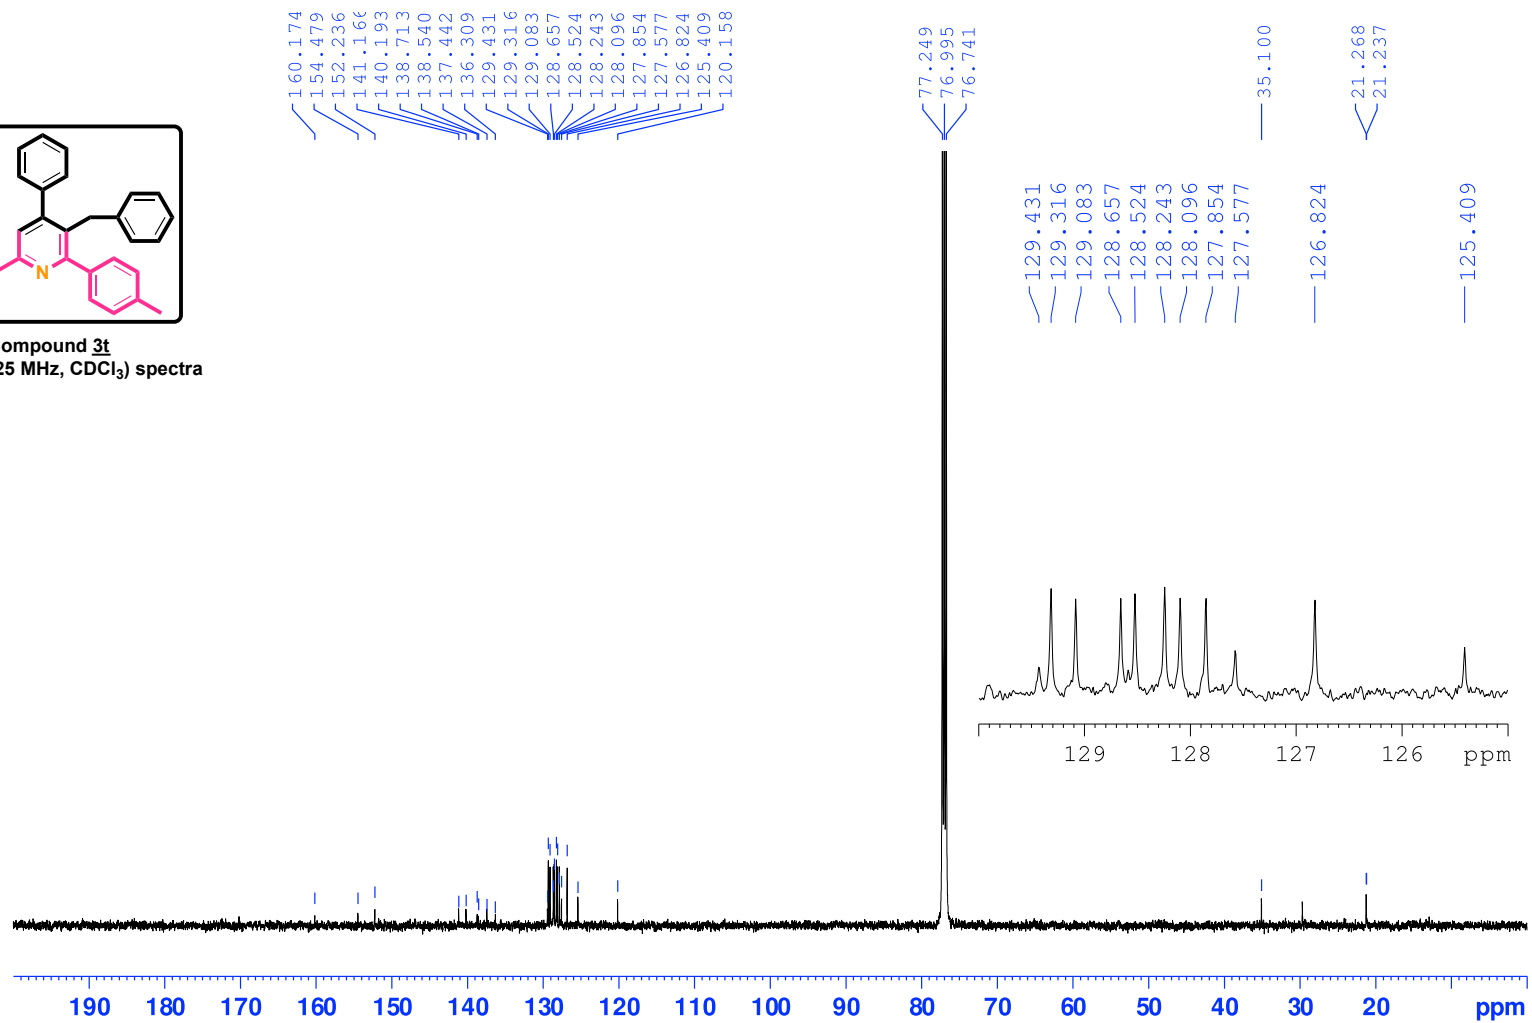

# Compound 2u

1H YHC-086 sep36-38 0126

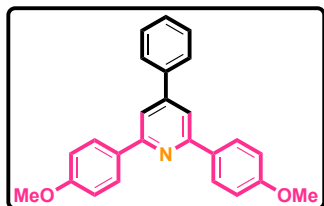

Compound 2u  
1H NMR (500 MHz, CDCl<sub>3</sub>) spectra

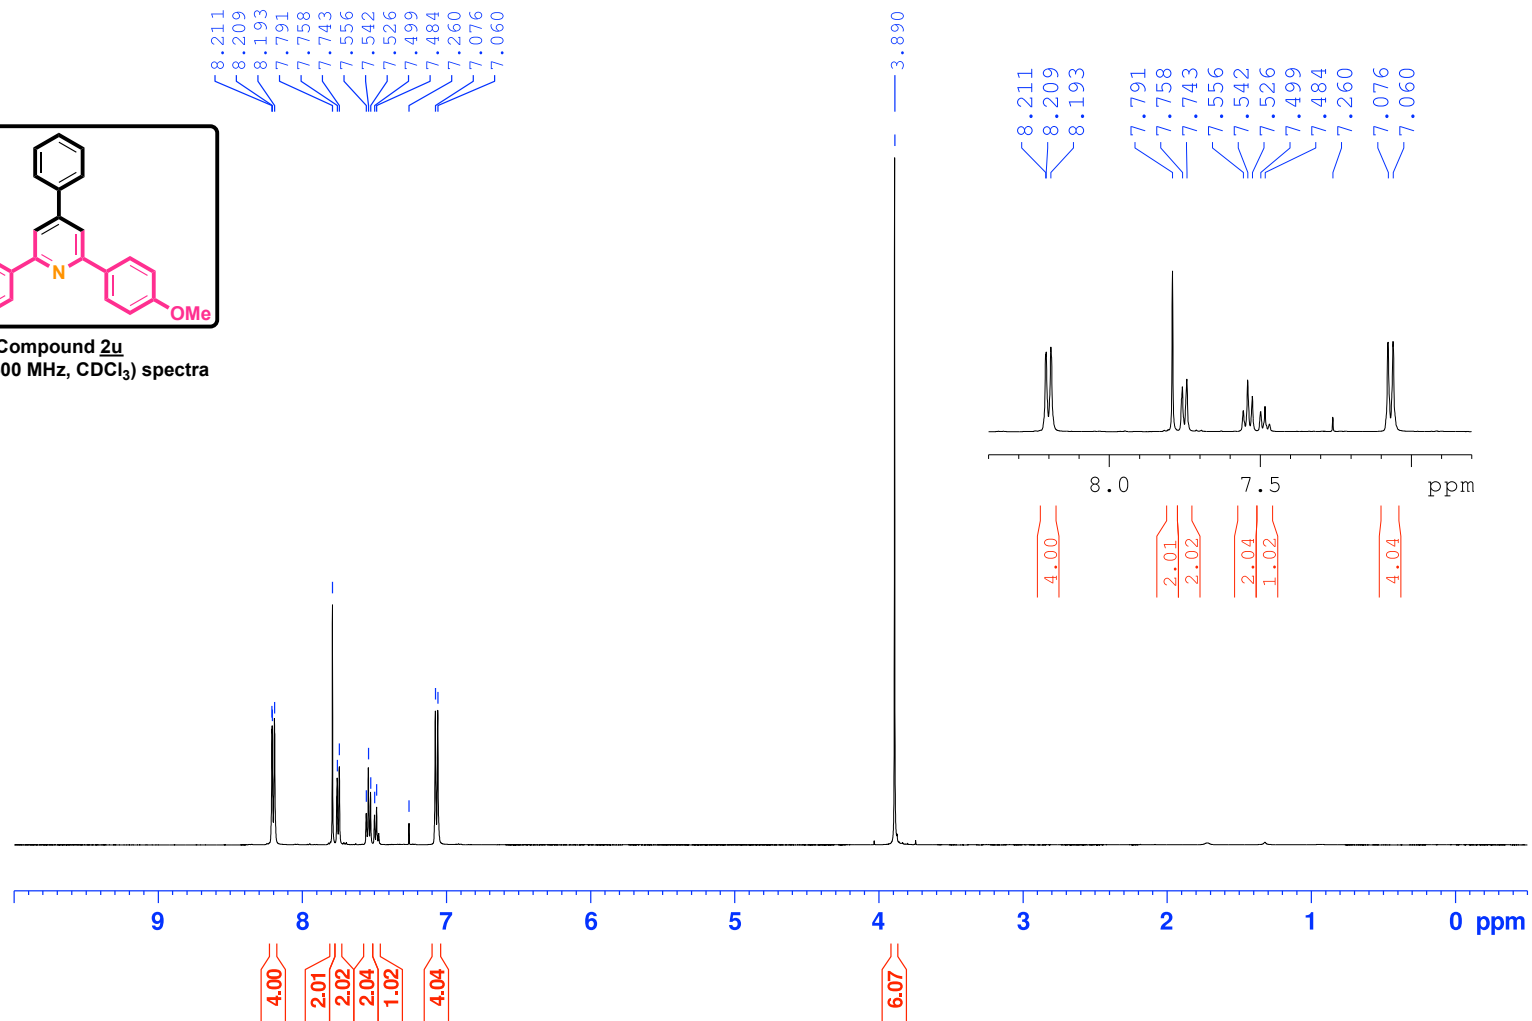



# Compound 2u

13C YHC-086 sep36-38 0126

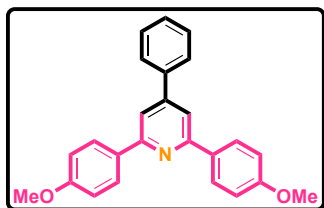

Compound 2u  
<sup>13</sup>C NMR (125 MHz, CDCl<sub>3</sub>) spectra

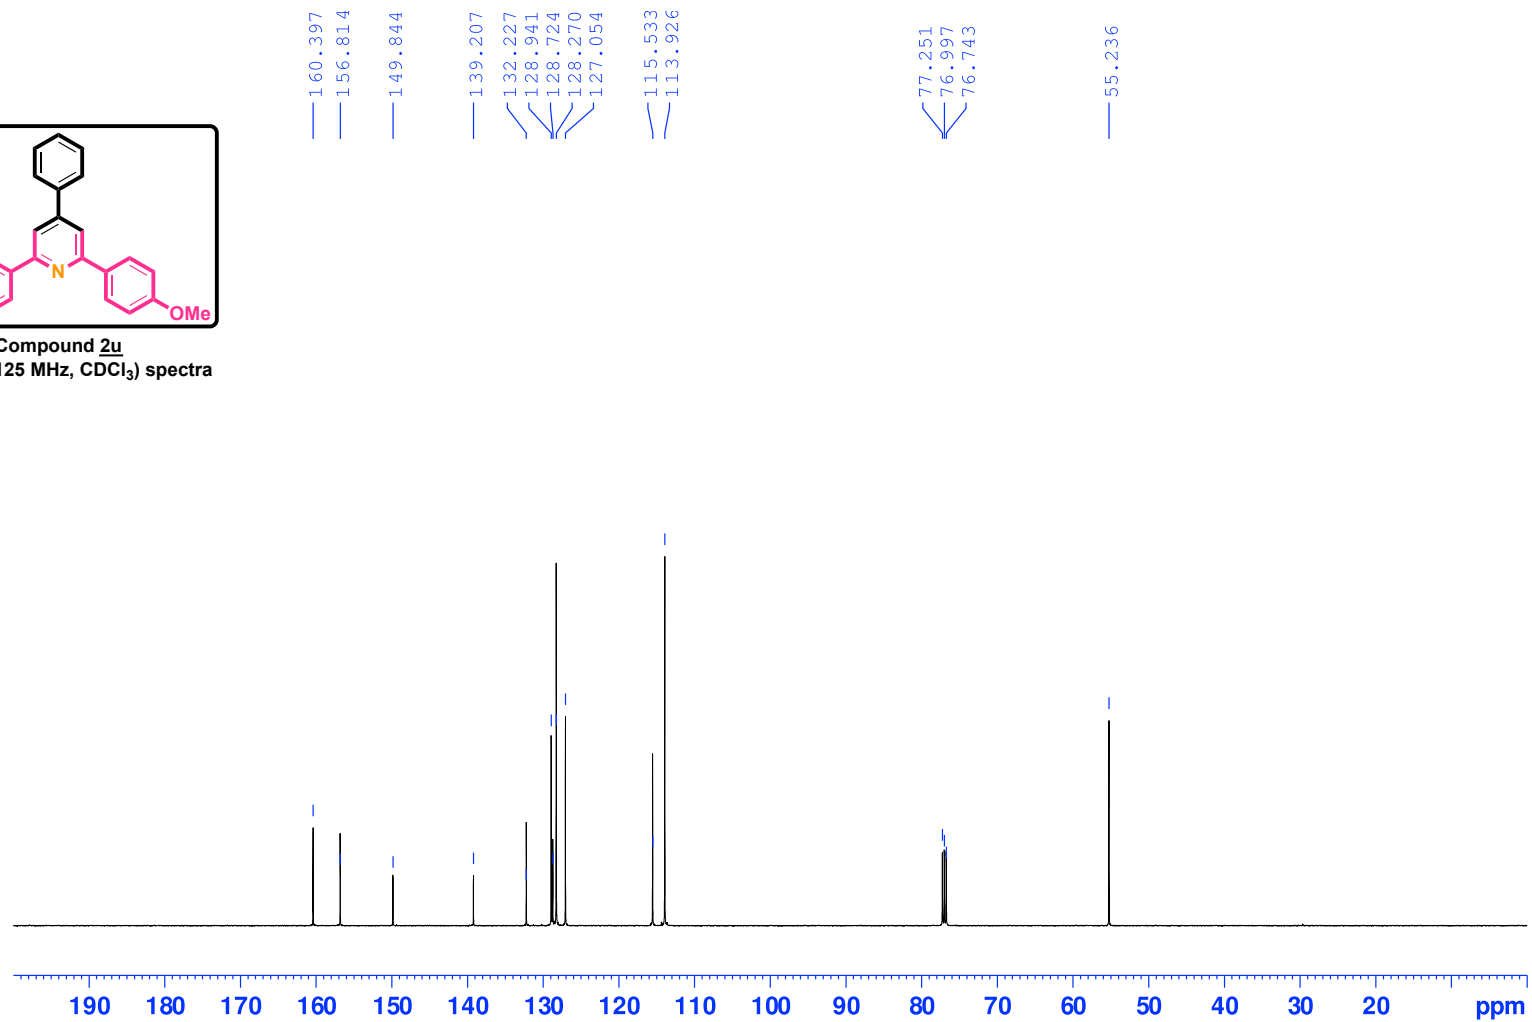

# Compound 3u

1H YHC-087 sep46-48 down 0128

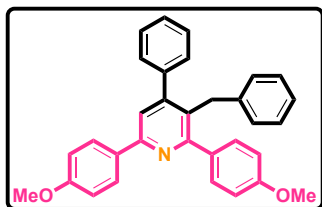

Compound 3u  
1H NMR (500 MHz, CDCl<sub>3</sub>) spectra

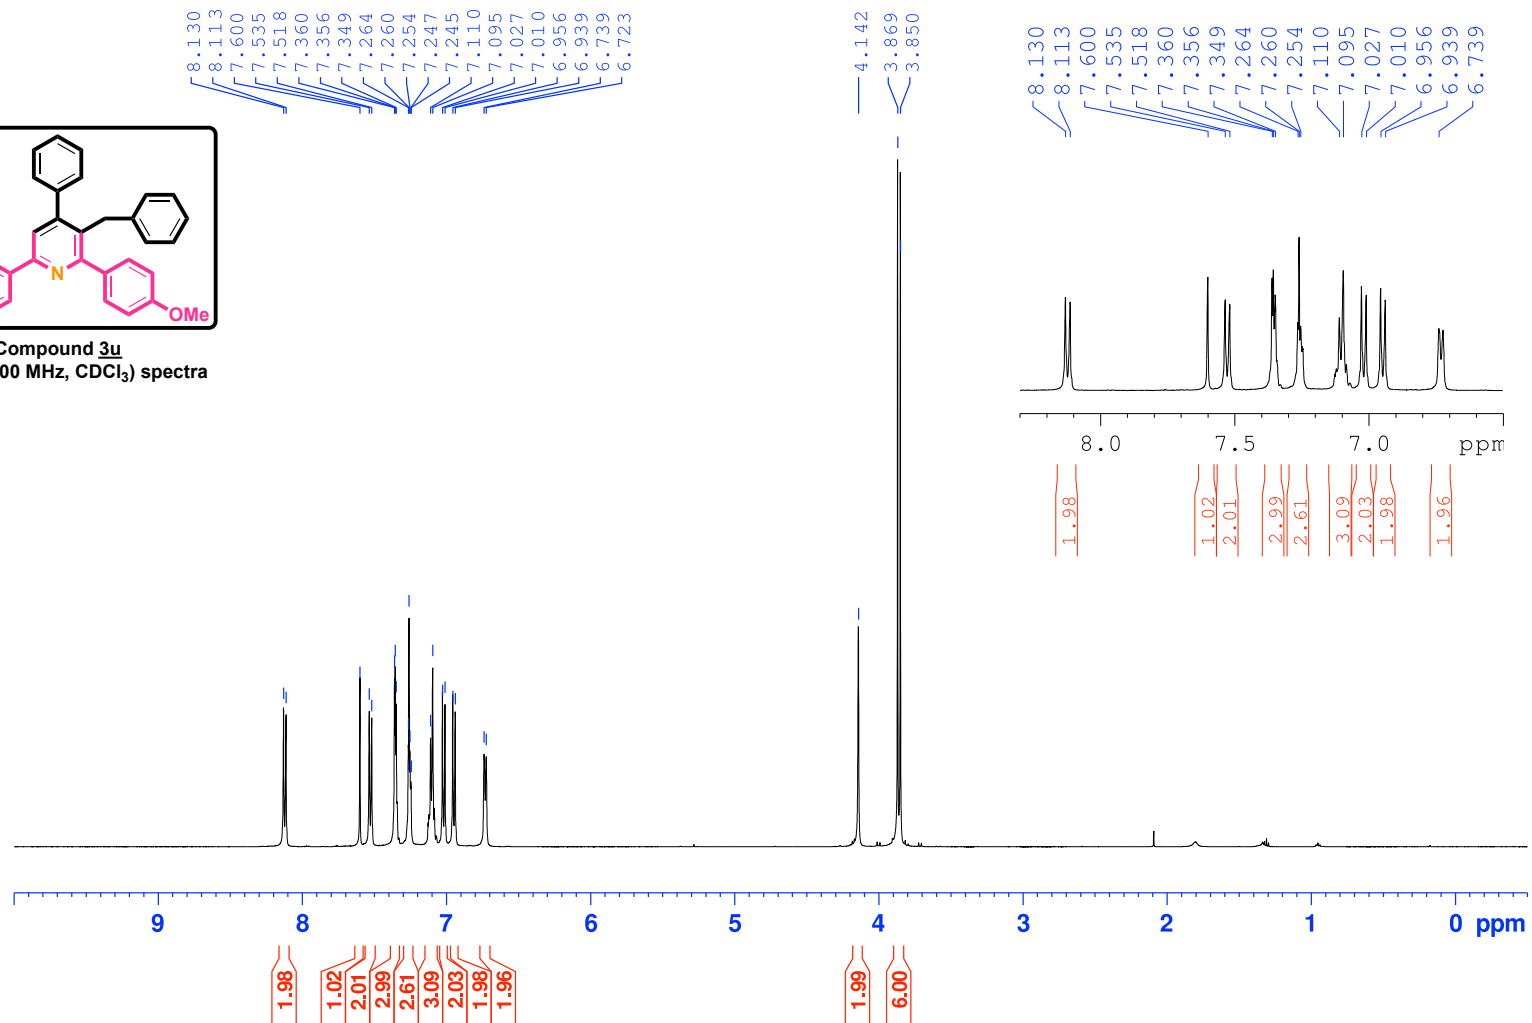

# Compound 3u

13C YHC-087 sep46-48 down 0128

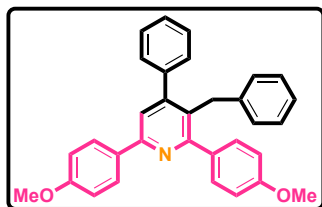

Compound 3u  
<sup>13</sup>C NMR (125 MHz, CDCl<sub>3</sub>) spectra

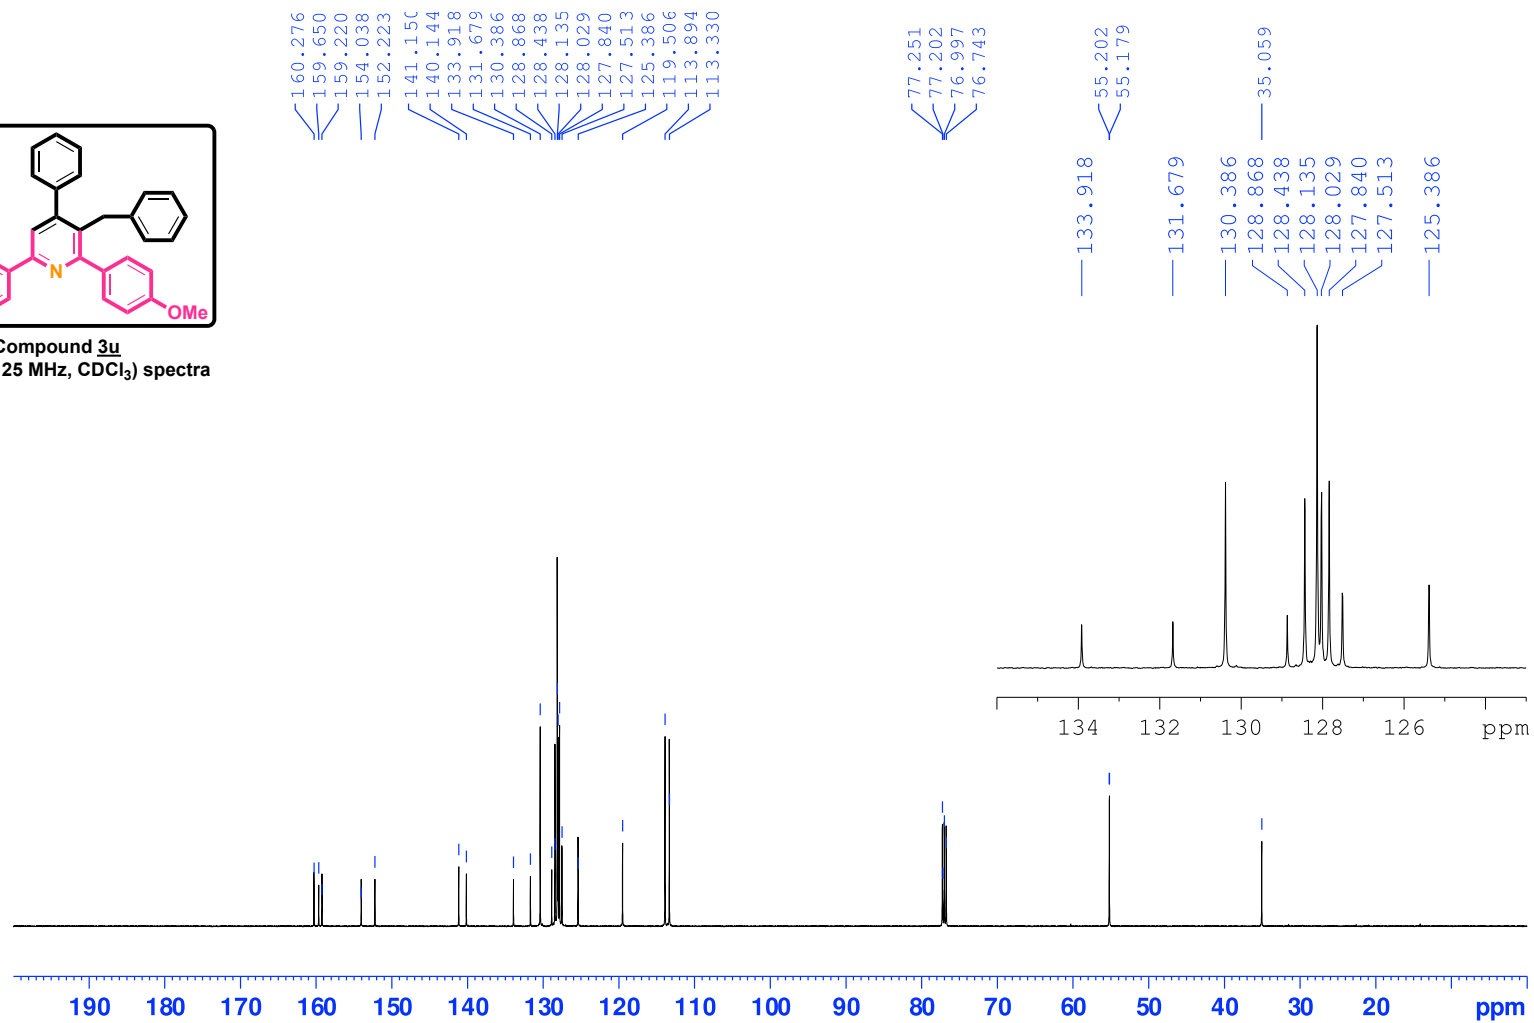

# Compound 2v

1H YHC-453-2 sep 5657 top 1101

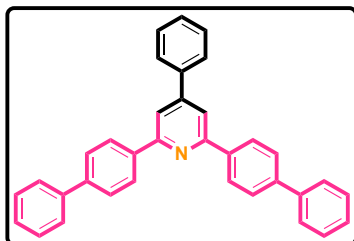

Compound 2v  
<sup>1</sup>H NMR (500 MHz, CDCl<sub>3</sub>) spectra

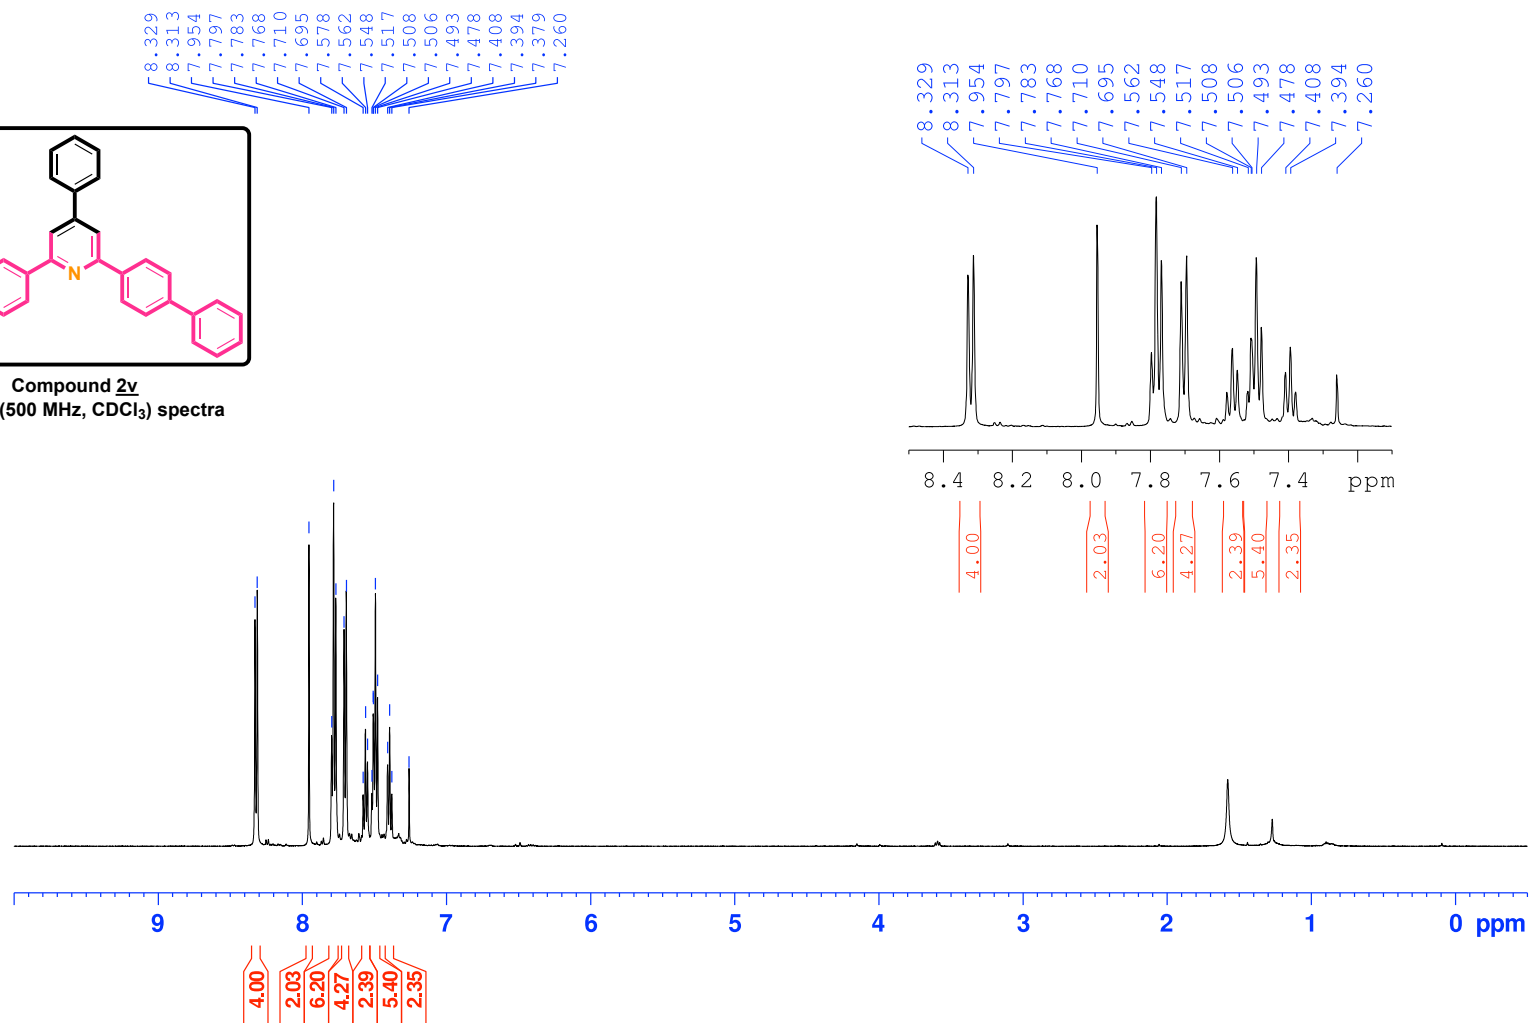

# Compound 2v

13C YHC-453-2 sep 5657 top 1101

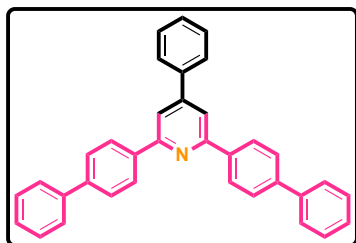

Compound 2v  
<sup>13</sup>C NMR (125 MHz, CDCl<sub>3</sub>) spectra

157.115  
150.232  
141.806  
140.681  
139.061  
138.468  
129.130  
129.002  
128.828  
127.521  
127.428  
127.200  
127.121  
117.040

77.253  
76.999  
76.745

129.130  
129.002  
128.828

127.521  
127.428  
127.200  
127.121

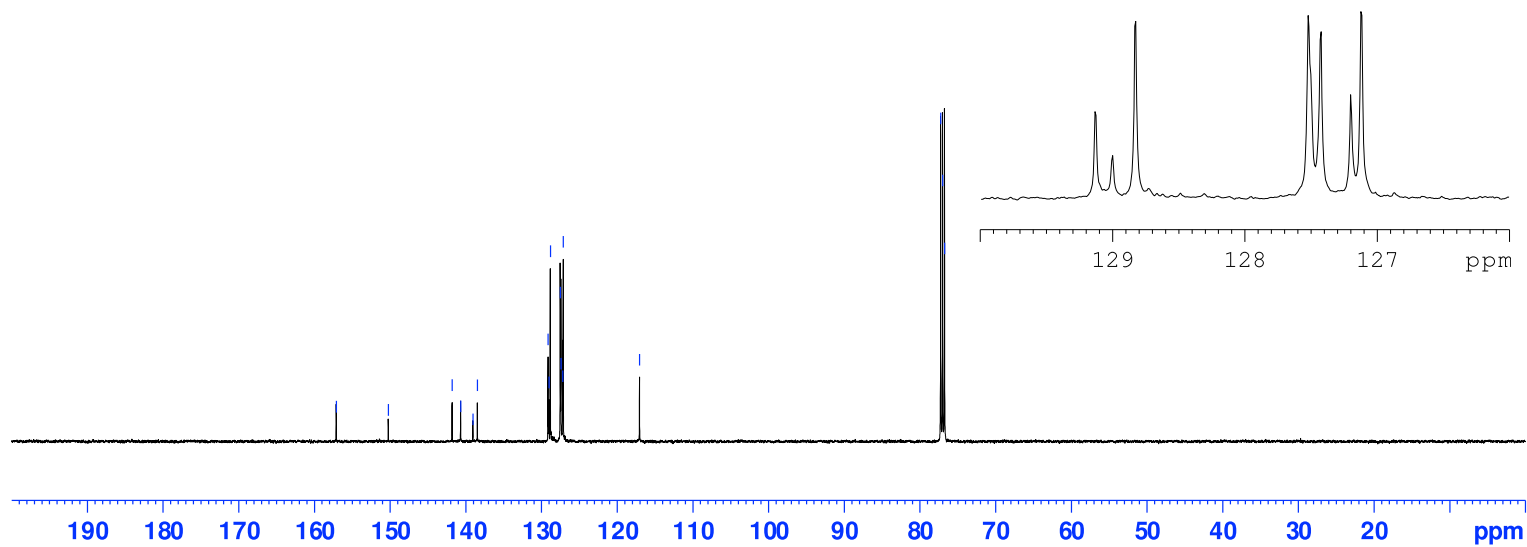

# Compound 3v

1H YHC-453-2 sep 6566 down 1103

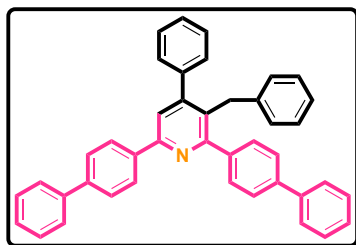

Compound 3v  
<sup>1</sup>H NMR (500 MHz, CDCl<sub>3</sub>) spectra

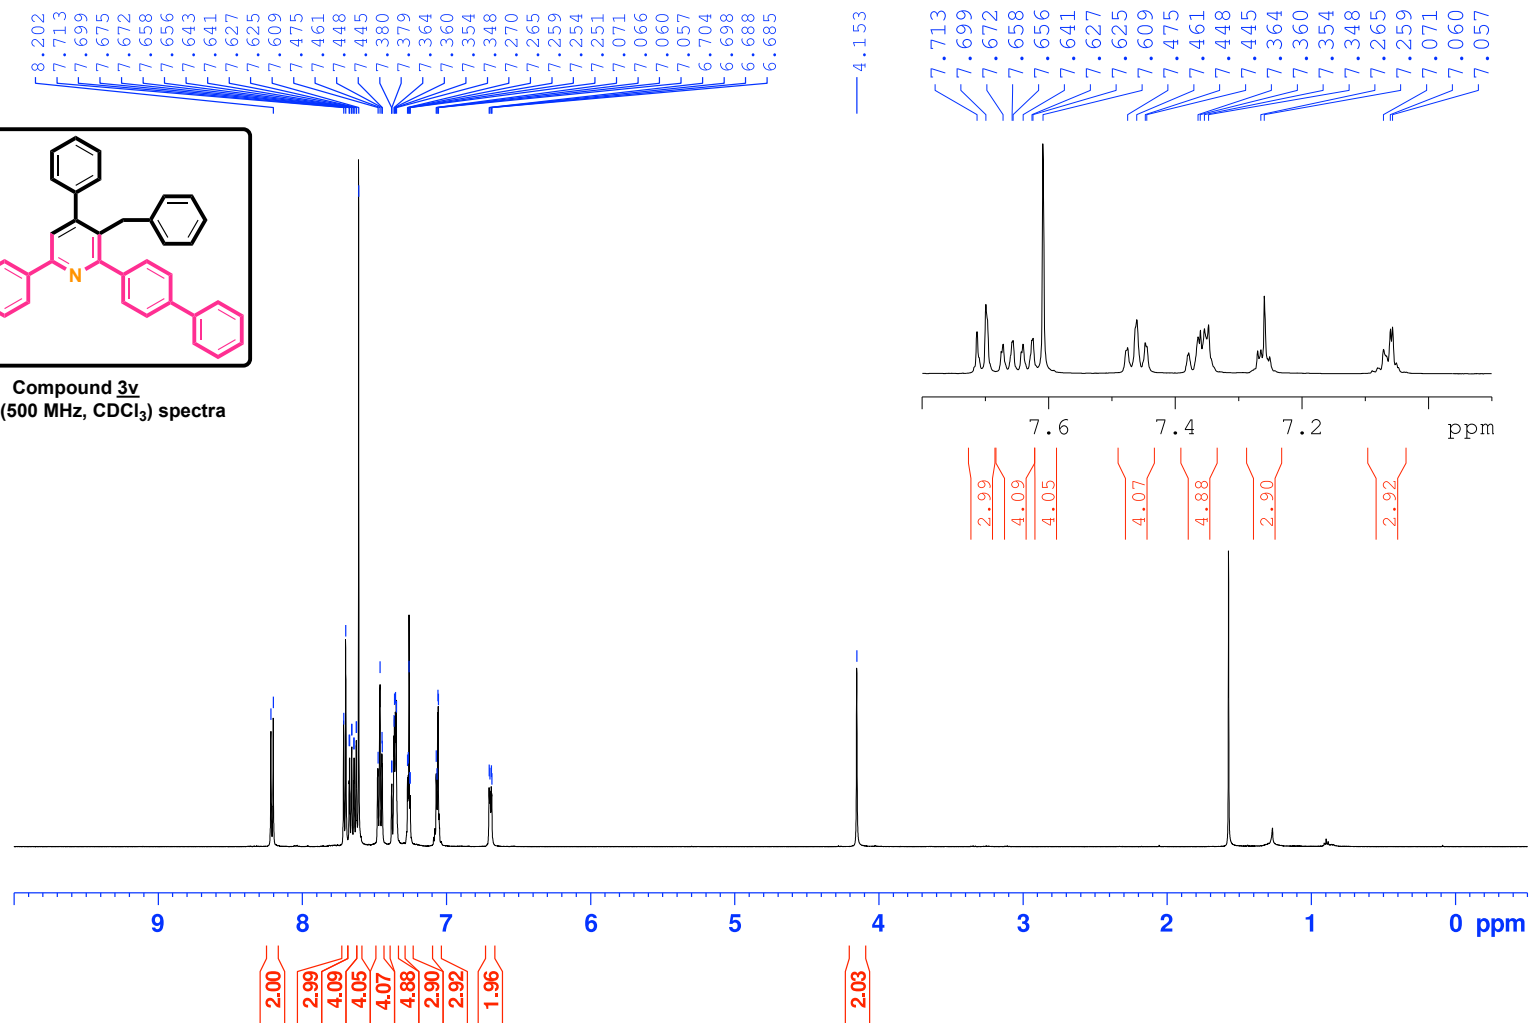

# Compound 3v

13C YHC-453-2 sep 6566 down 1103

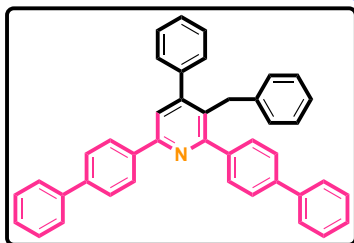

Compound 3v  
<sup>13</sup>C NMR (125 MHz, CDCl<sub>3</sub>) spectra

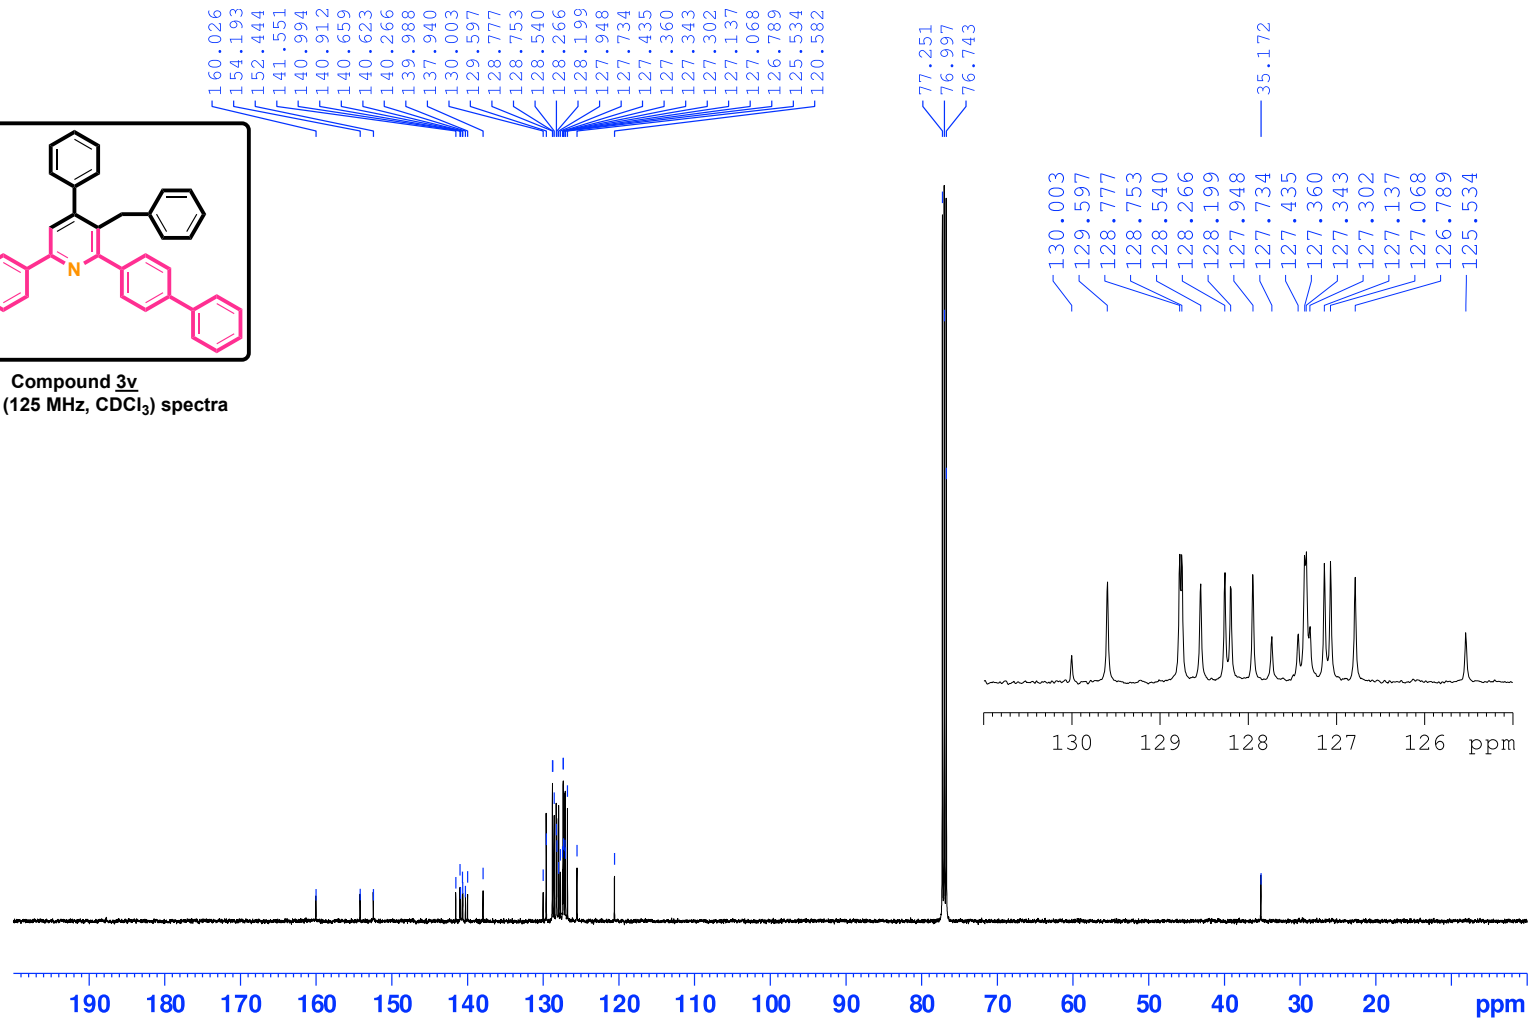

# Compound 2w

1H YHC-456 sep 2425 top 1014

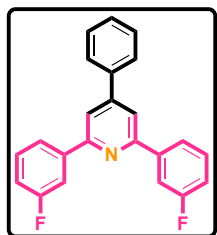

Compound 2w  
<sup>1</sup>H NMR (500 MHz, CDCl<sub>3</sub>) spectra

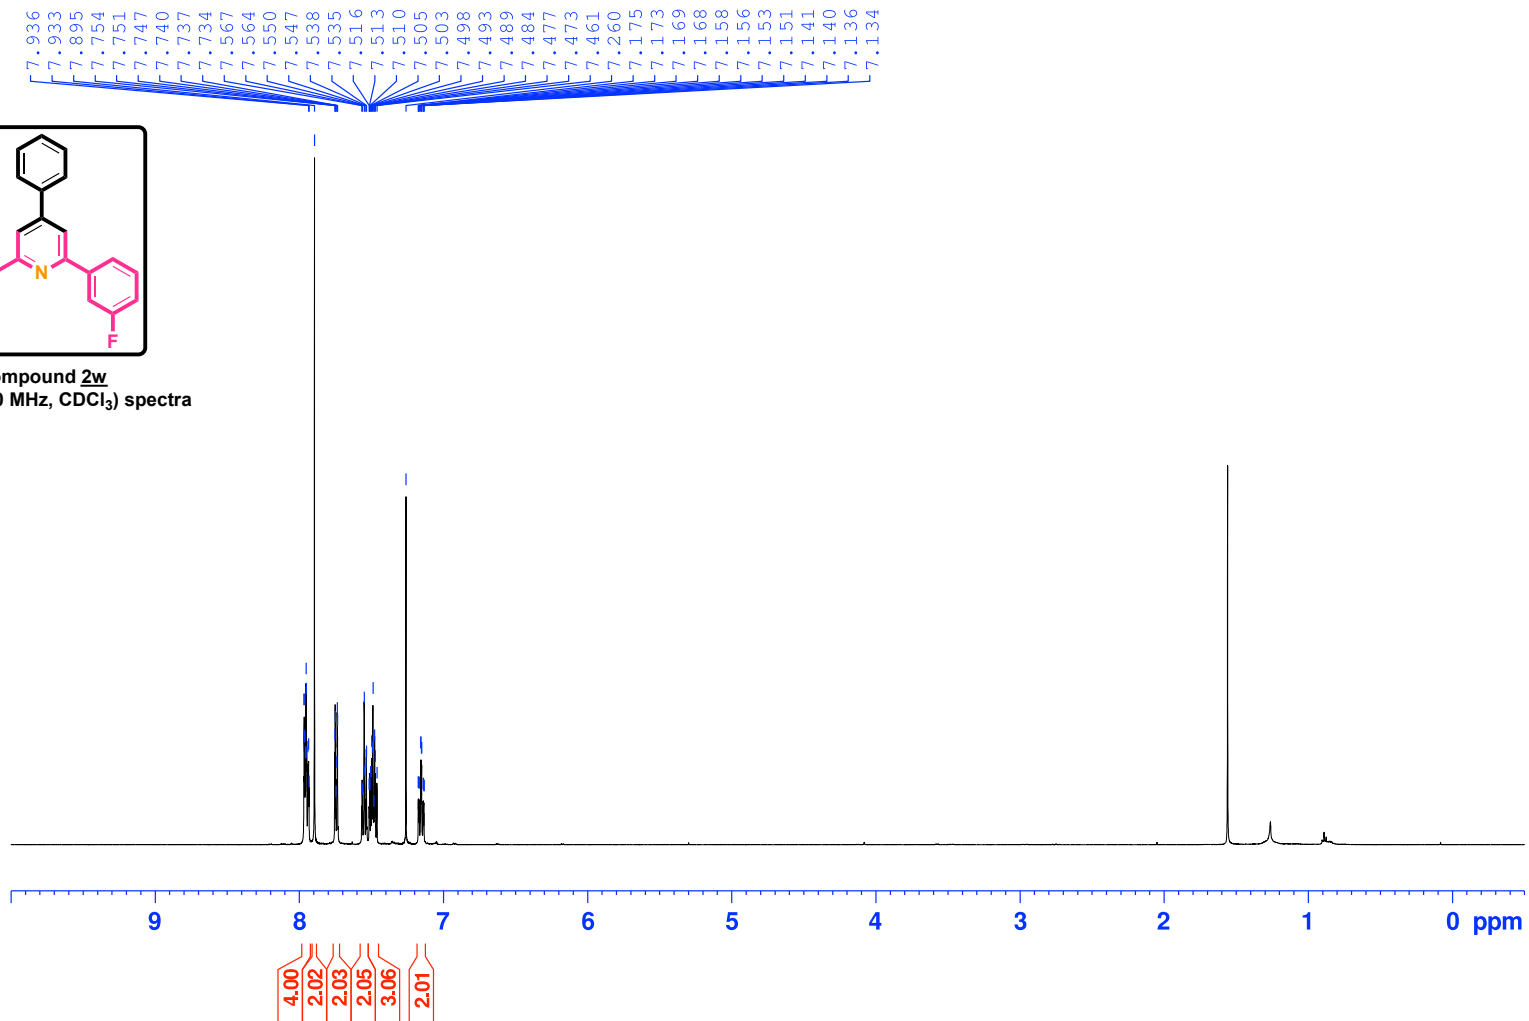



# Compound 2w

13C YHC-456 sep 2425 top 1014

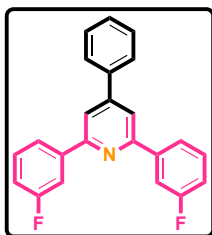

Compound 2w  
<sup>13</sup>C NMR (125 MHz, CDCl<sub>3</sub>) spectra

164.324  
162.374  
156.195  
156.177  
150.621  
141.649  
141.590  
138.587  
130.228  
130.163  
129.223  
129.197  
127.153  
122.566  
122.547  
117.622  
116.092  
115.923  
114.147  
113.965

77.249  
76.995  
76.741

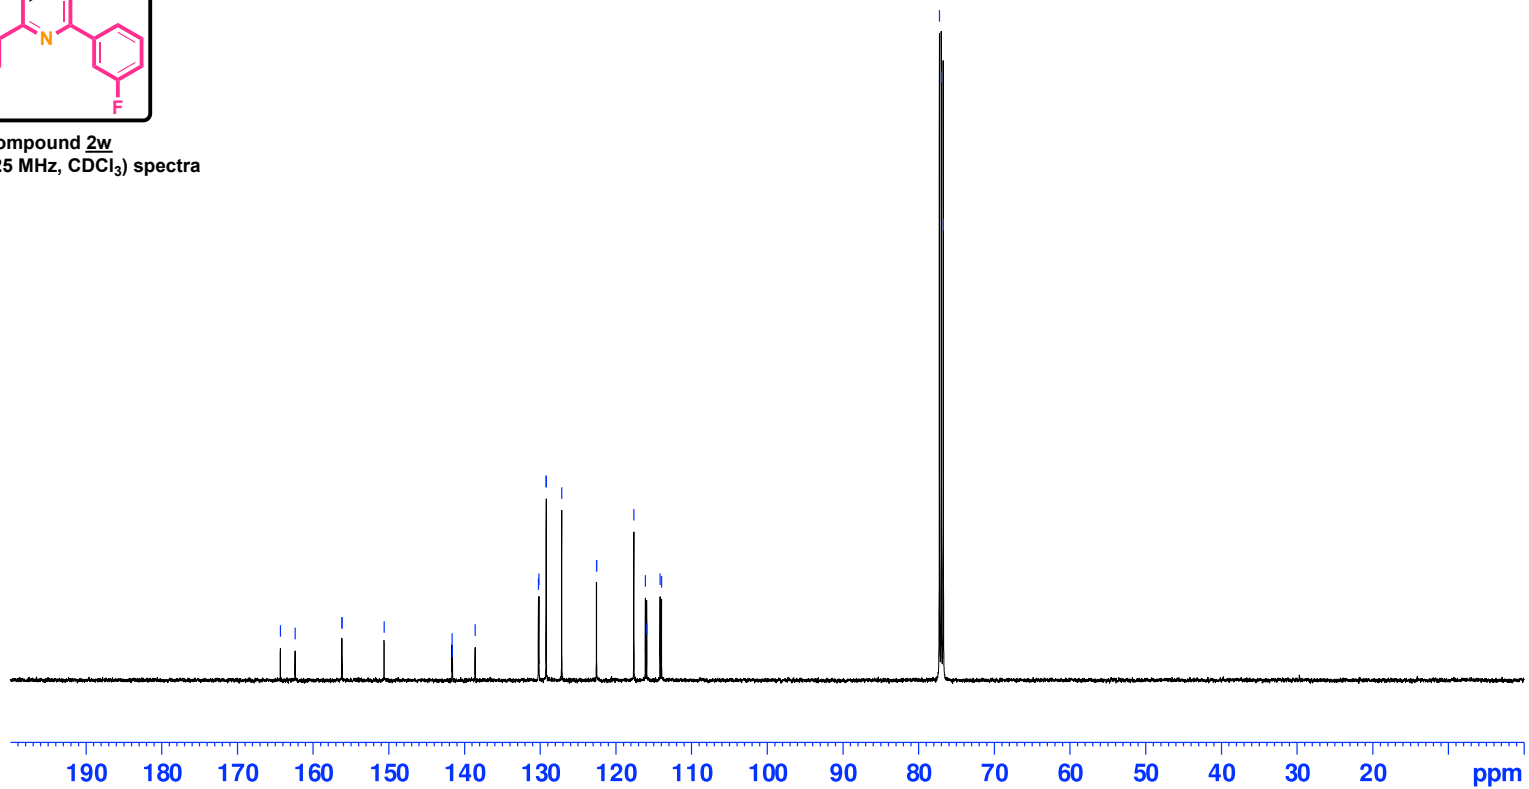

# Compound 3w

1H YHC-456 sep 6566 down 1014

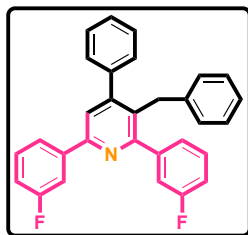

Compound 3w  
<sup>1</sup>H NMR (500 MHz, CDCl<sub>3</sub>) spectra

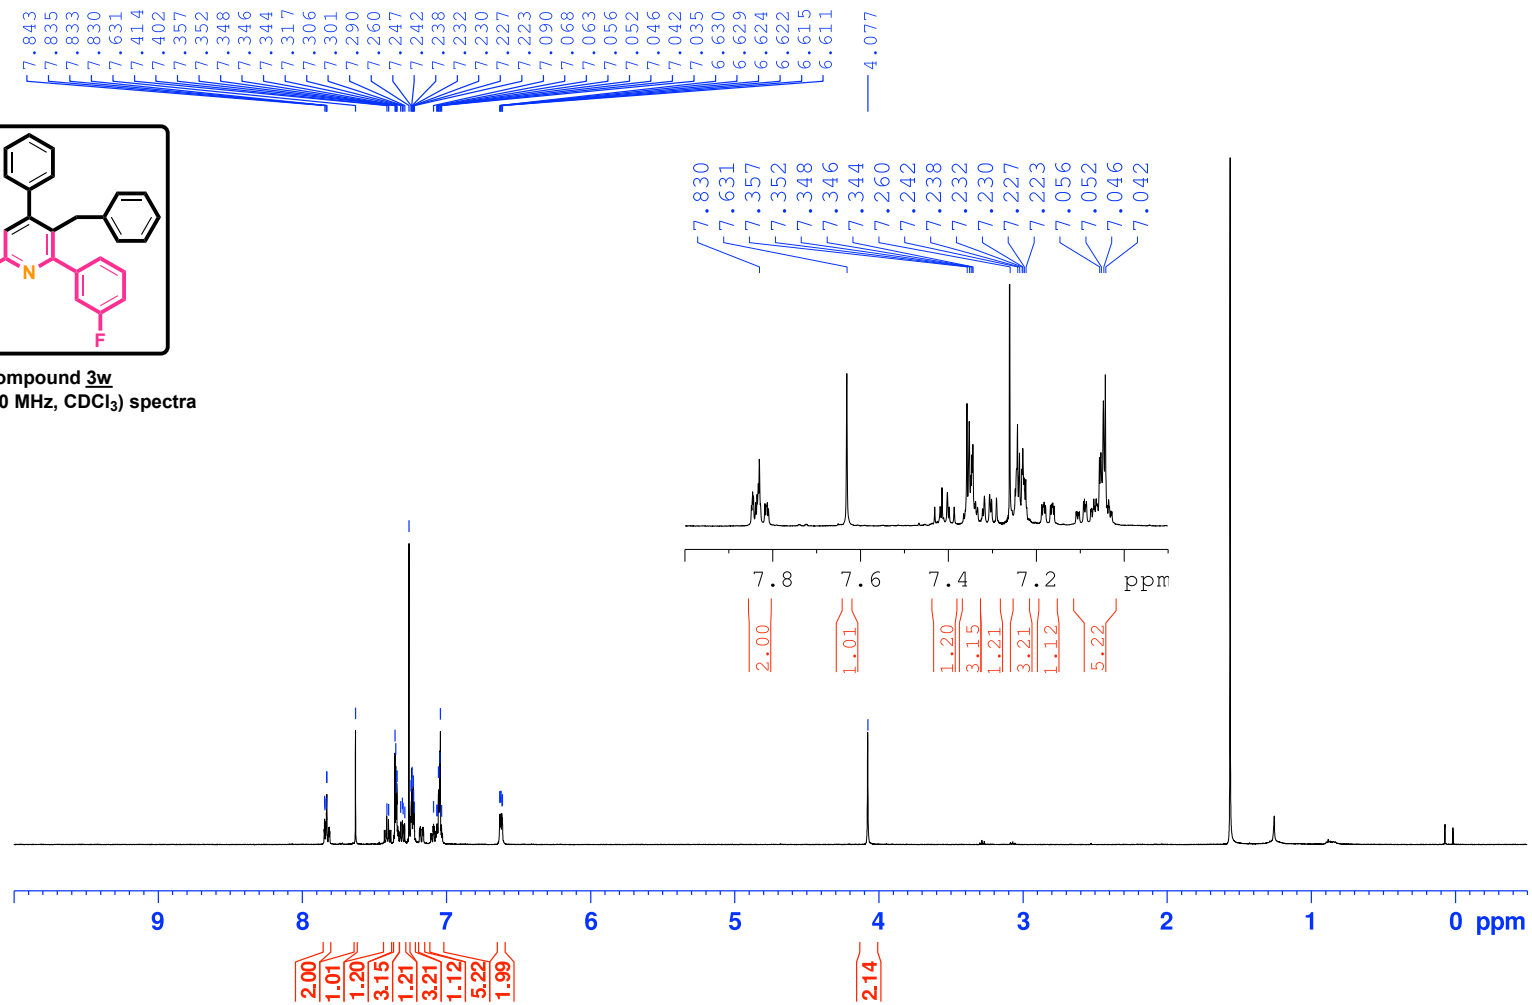

# Compound 3w

13C YHC-456 sep 6566 down 1014

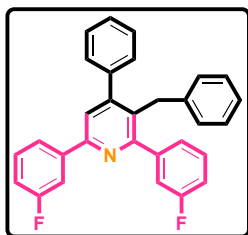

Compound 3w  
<sup>13</sup>C NMR (125 MHz, CDCl<sub>3</sub>) spectra

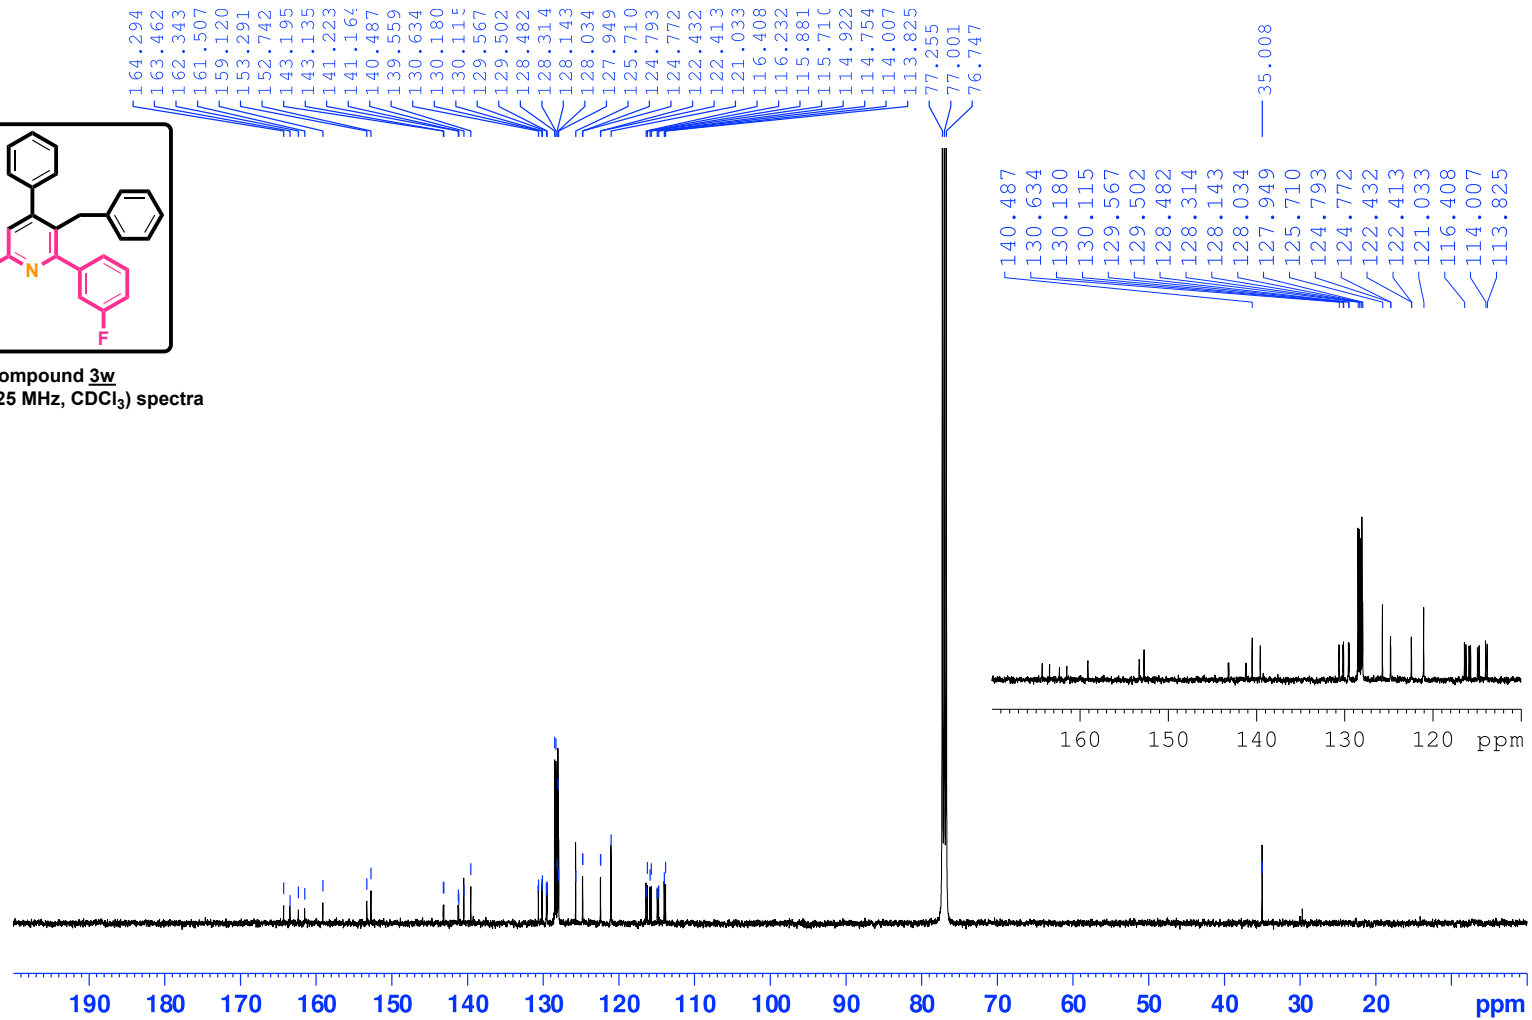

# Compound 2x

1H YHC-459 sep 78-80 top 1013

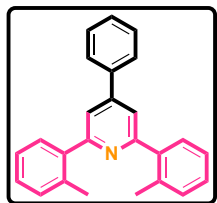

Compound 2x  
<sup>1</sup>H NMR (500 MHz, CDCl<sub>3</sub>) spectra

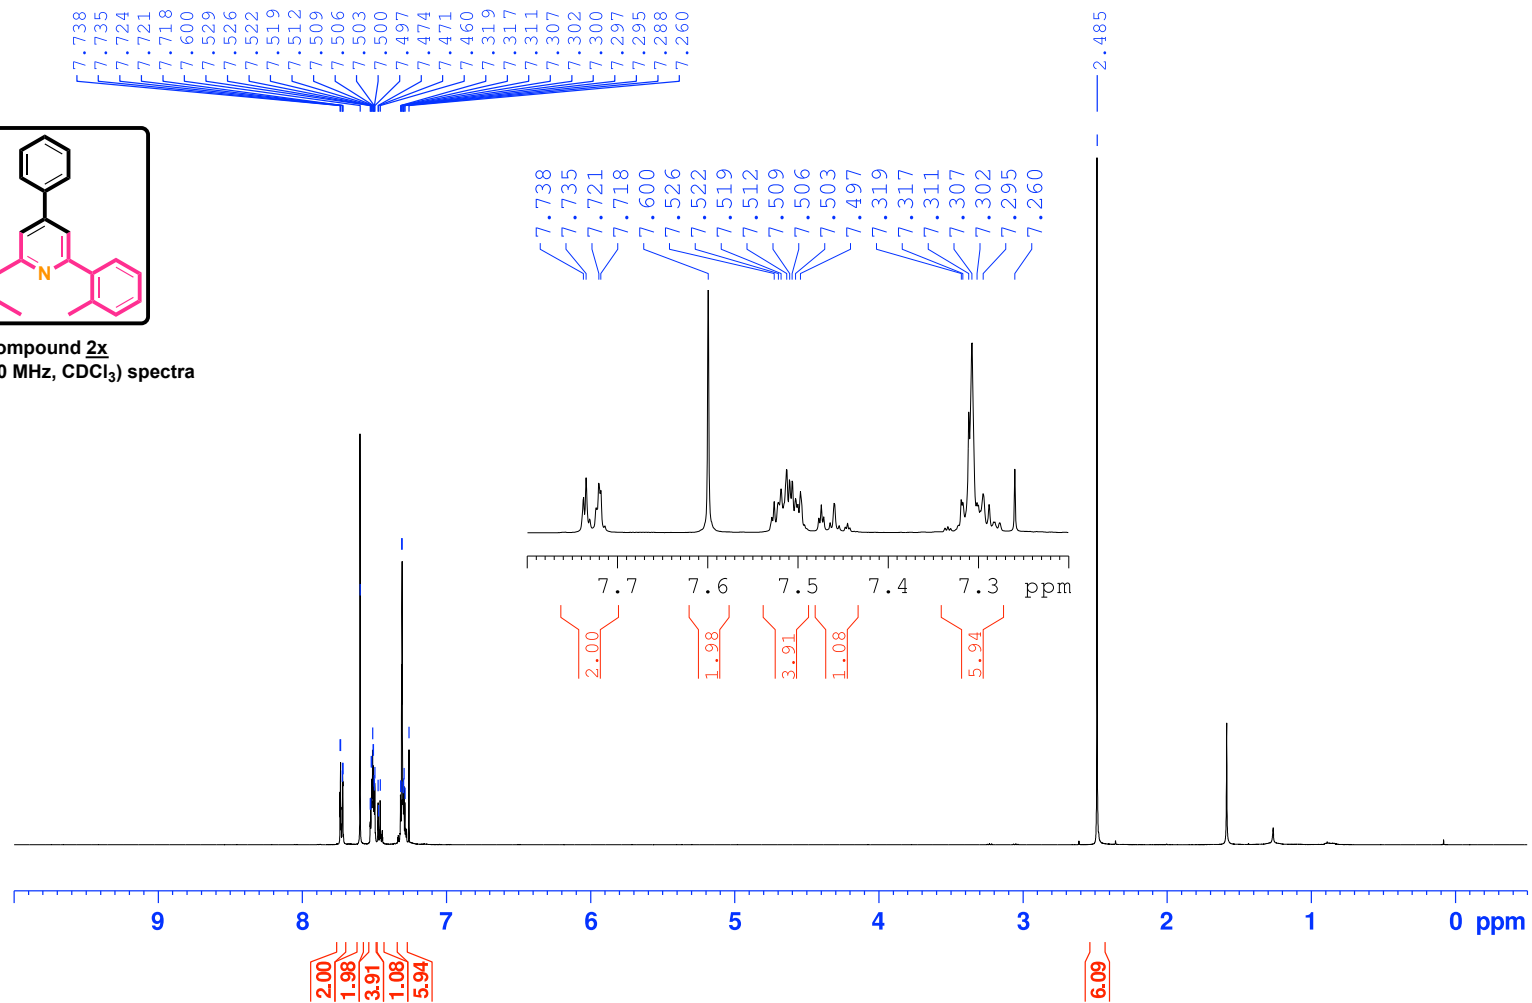

# Compound 2x

13C YHC-459 sep 78-80 top 1013

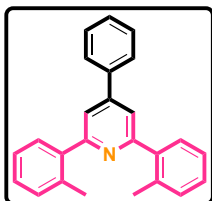

Compound 2x  
<sup>13</sup>C NMR (125 MHz, CDCl<sub>3</sub>) spectra

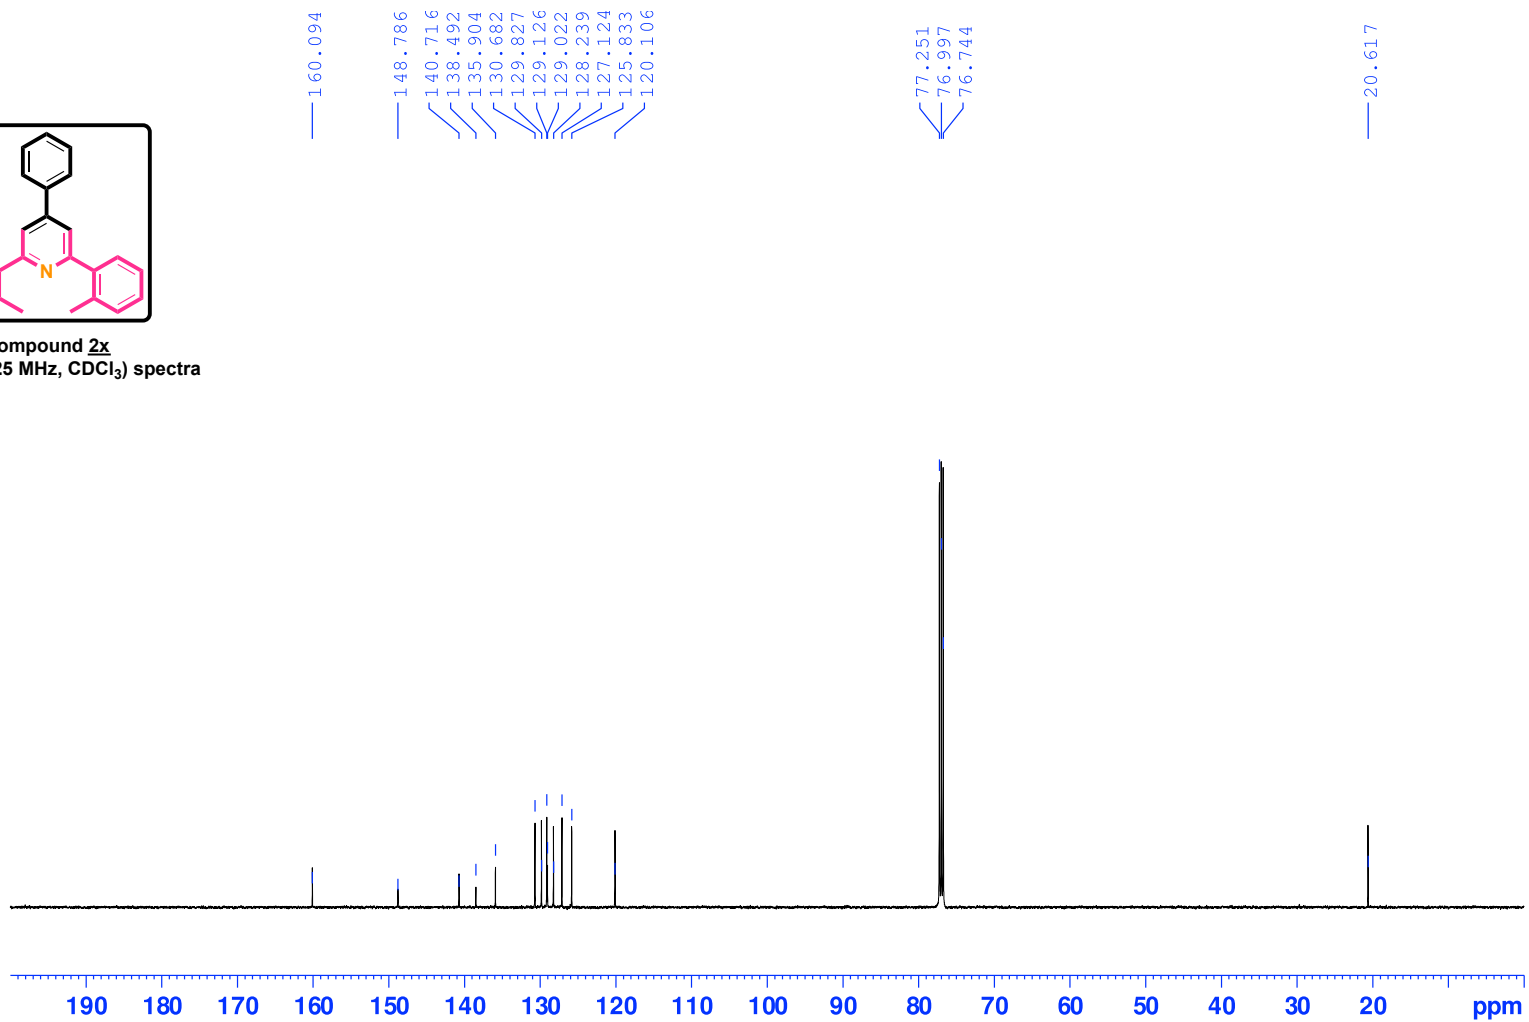

# Compound 3x

1H YHC-459 sep 121122 down 1013

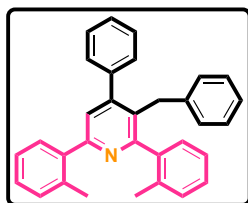

Compound 3x  
<sup>1</sup>H NMR (500 MHz, CDCl<sub>3</sub>) spectra

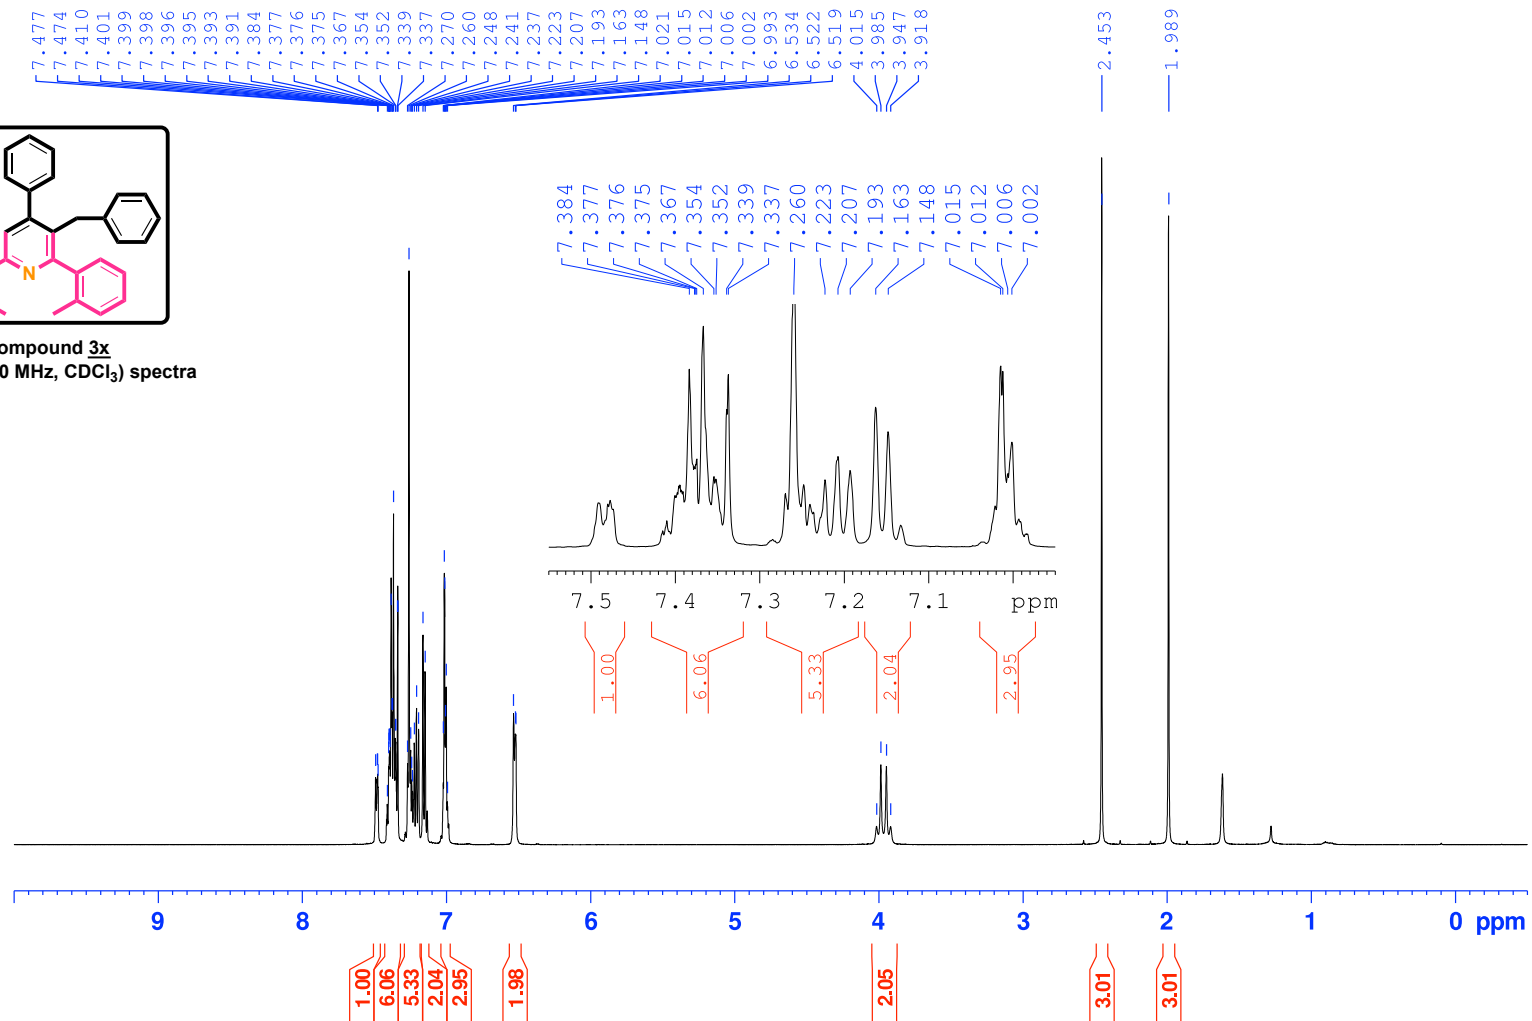

# Compound 3x

13C YHC-459 sep 121122 down 1013

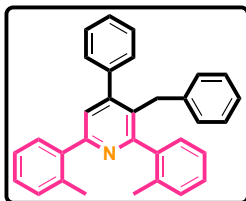

Compound 3x  
<sup>13</sup>C NMR (125 MHz, CDCl<sub>3</sub>) spectra

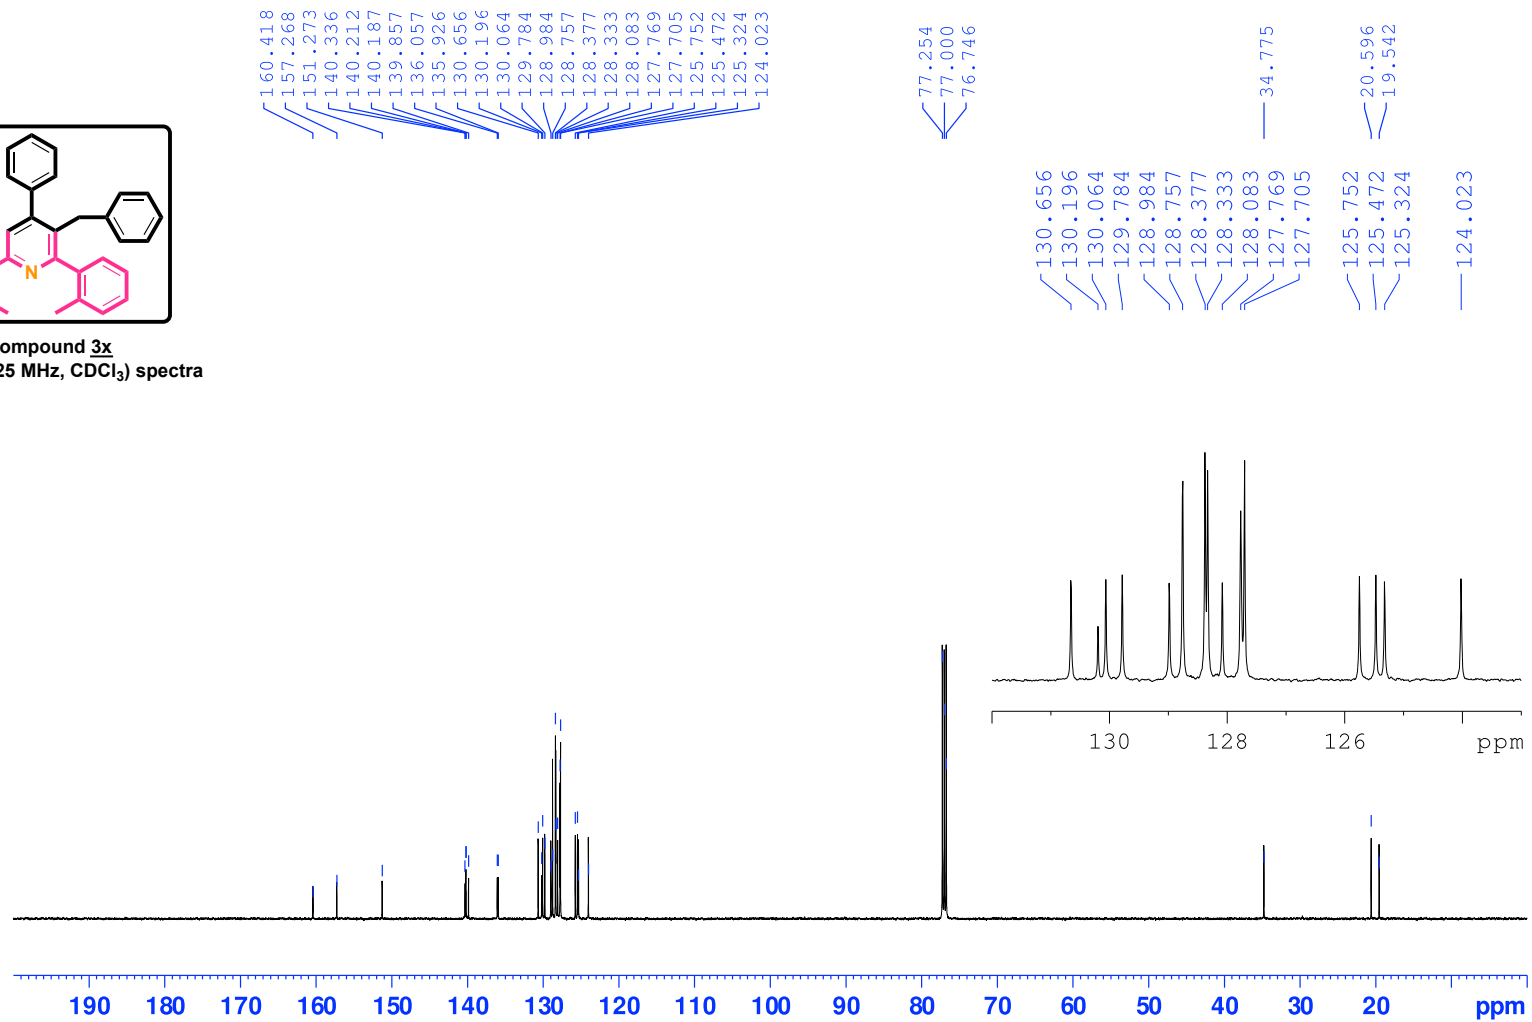

# Compound 2y

1H YHC-462 sep 5859 top 1027

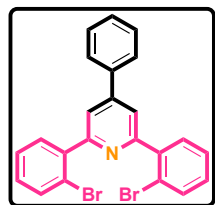

Compound 2y  
<sup>1</sup>H NMR (500 MHz, CDCl<sub>3</sub>) spectra

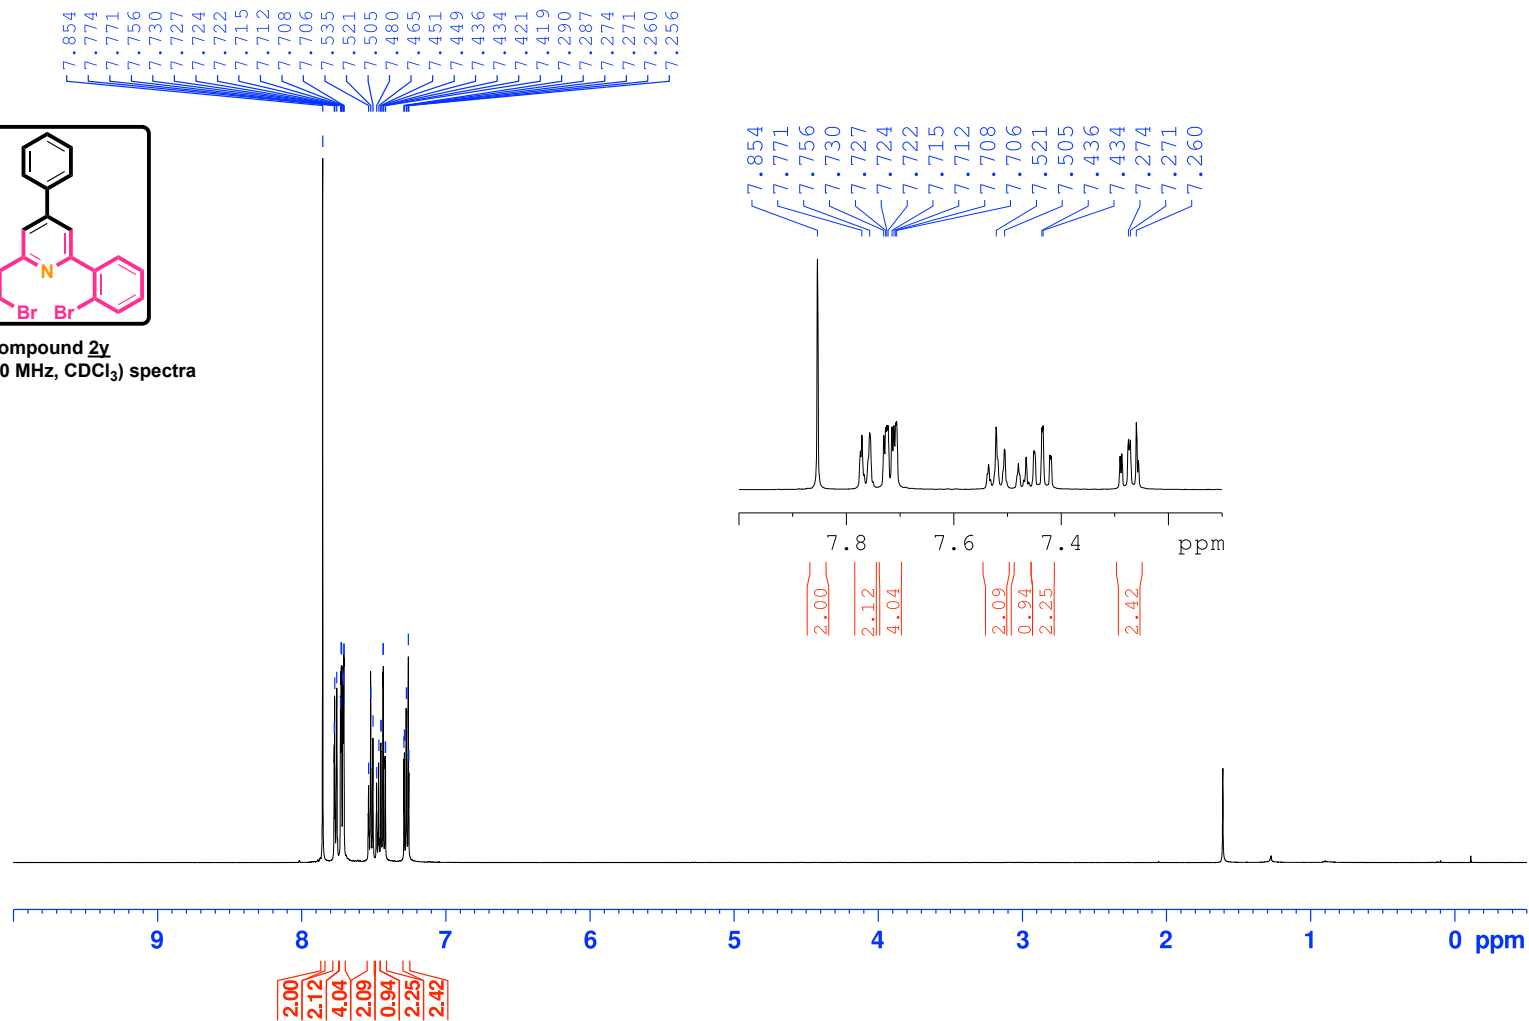



# Compound 2y

13C YHC-462 sep 5859 top 1027

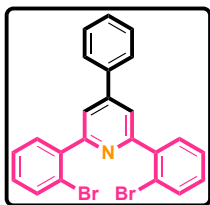

Compound 2y  
<sup>13</sup>C NMR (125 MHz, CDCl<sub>3</sub>) spectra

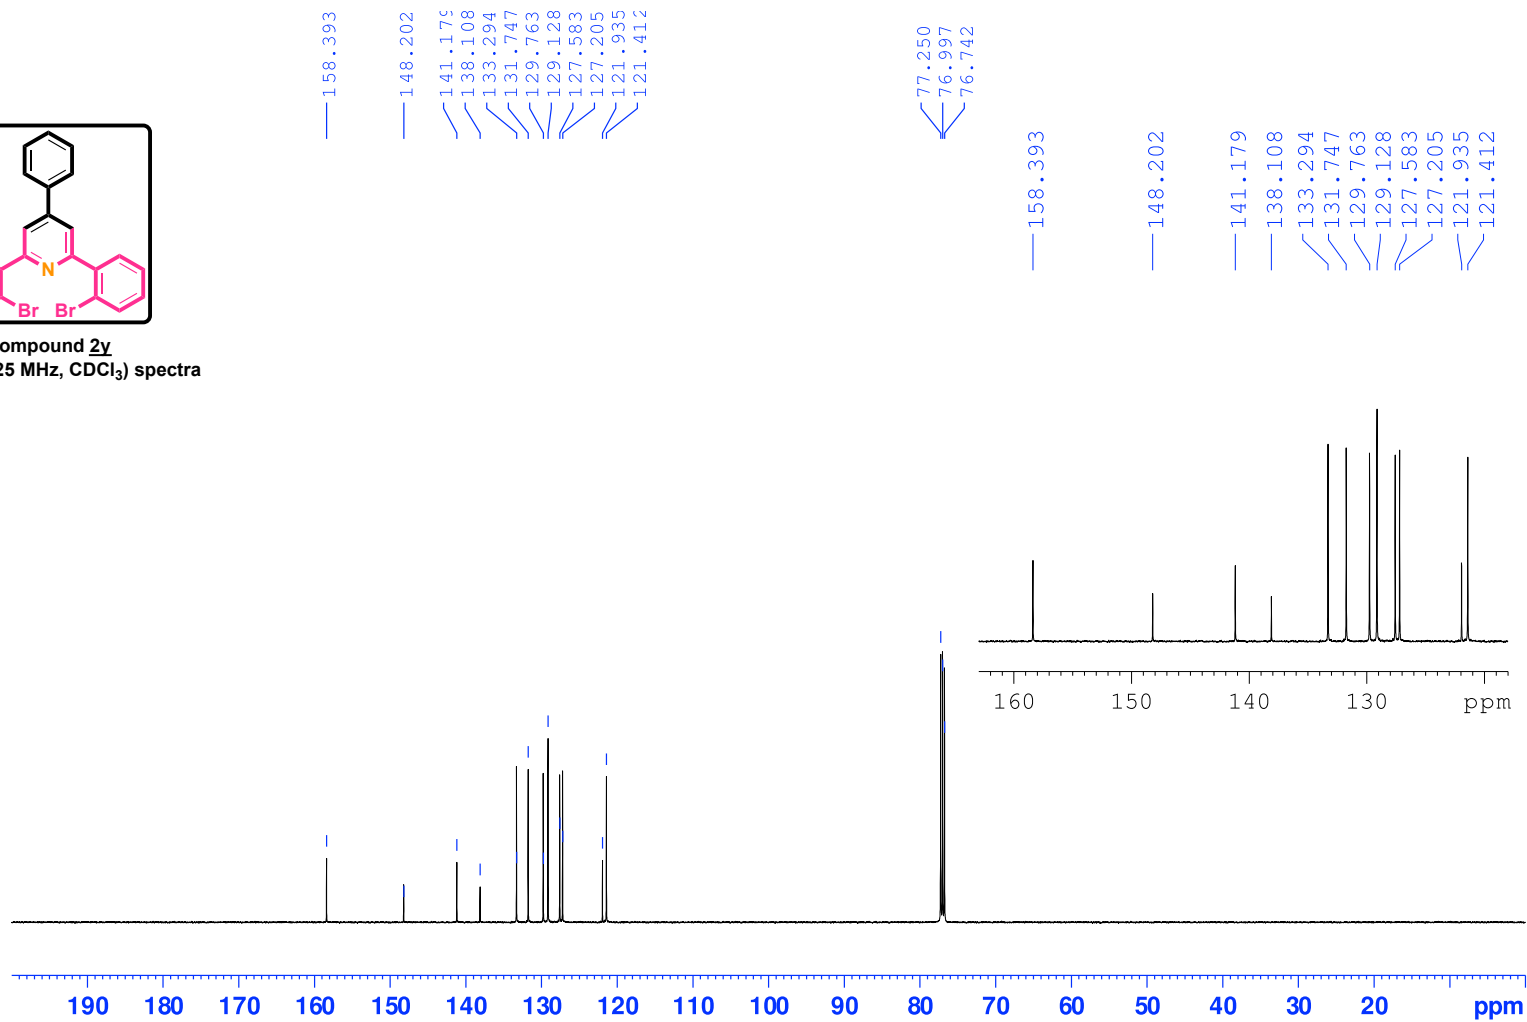

# Compound 3y

1H YHC-462 sep 7071 down 1027

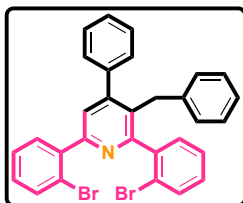

Compound 3y  
<sup>1</sup>H NMR (500 MHz, CDCl<sub>3</sub>) spectra

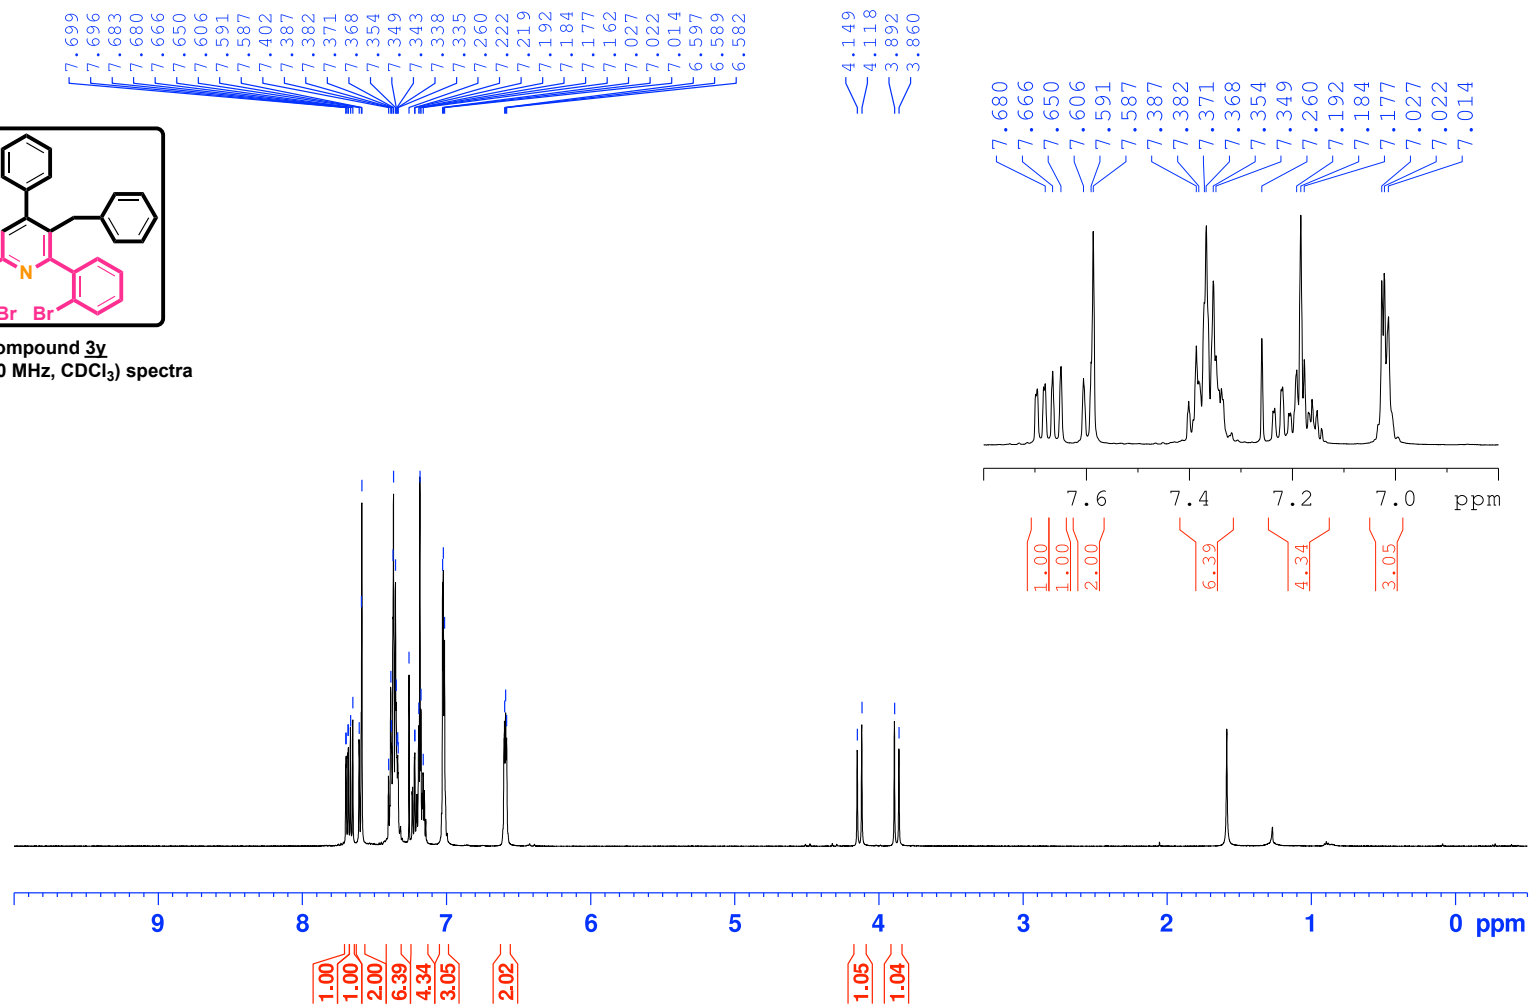

# Compound 3y

13C YHC-462 sep 7071 down 1027

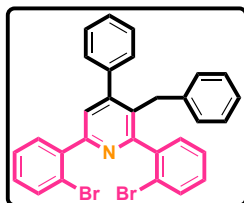

Compound 3y  
<sup>13</sup>C NMR (125 MHz, CDCl<sub>3</sub>) spectra

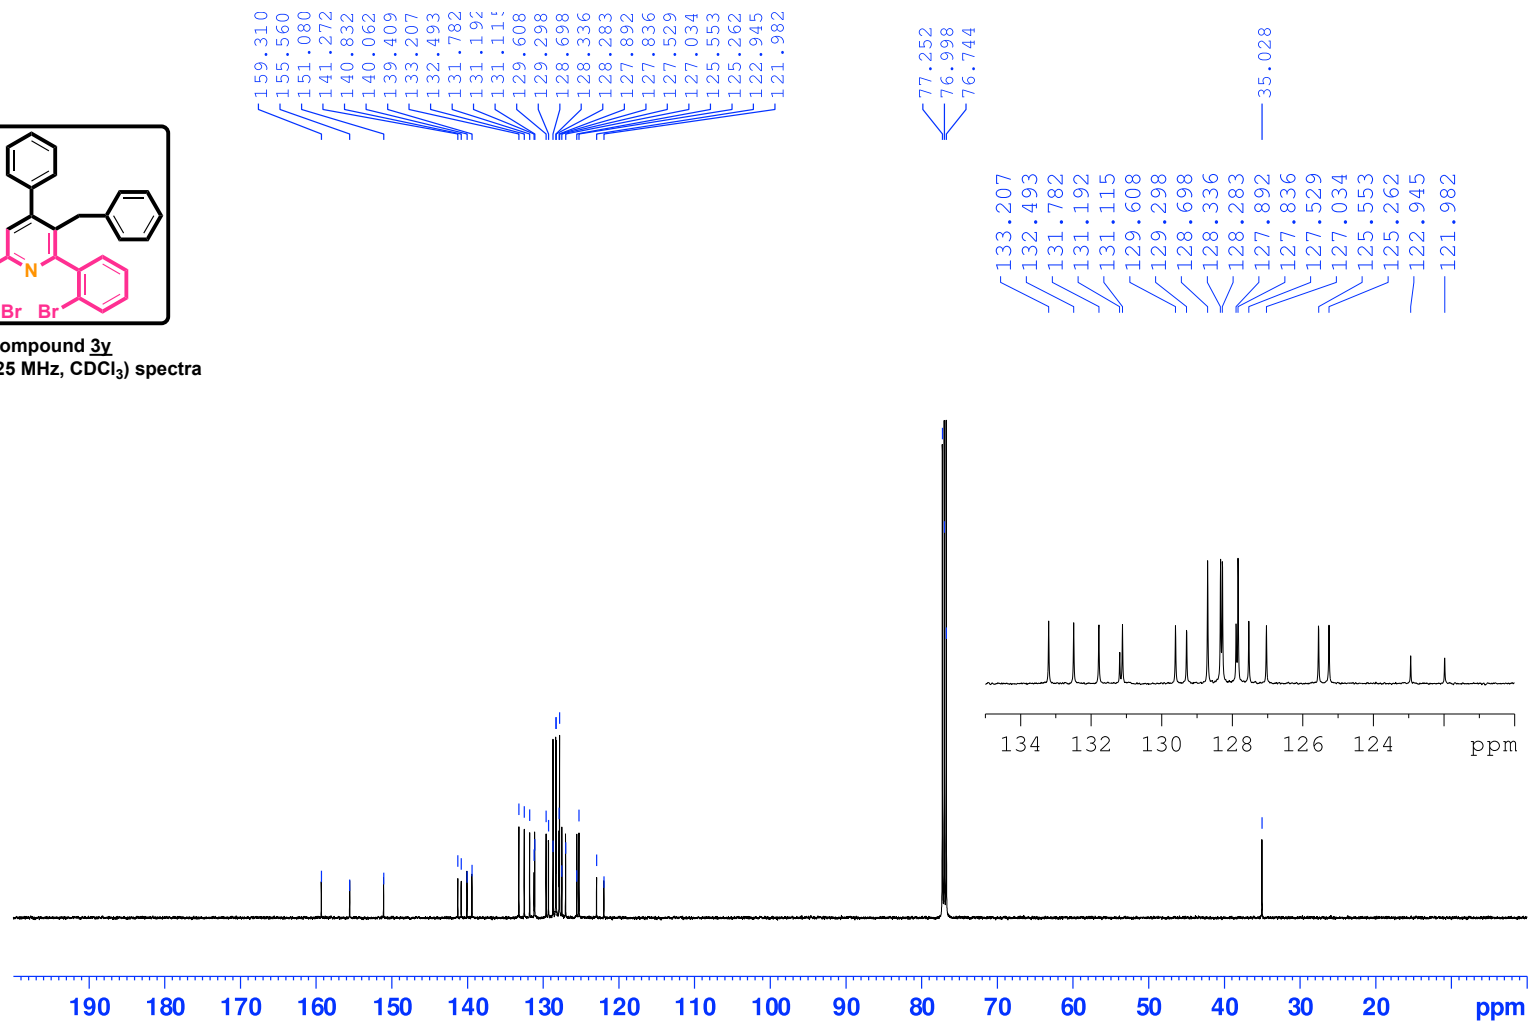

# Compound 2z

1H YHC-460 sep 15-17 top 0628

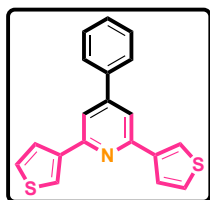

Compound 2z  
<sup>1</sup>H NMR (500 MHz, CDCl<sub>3</sub>) spectra

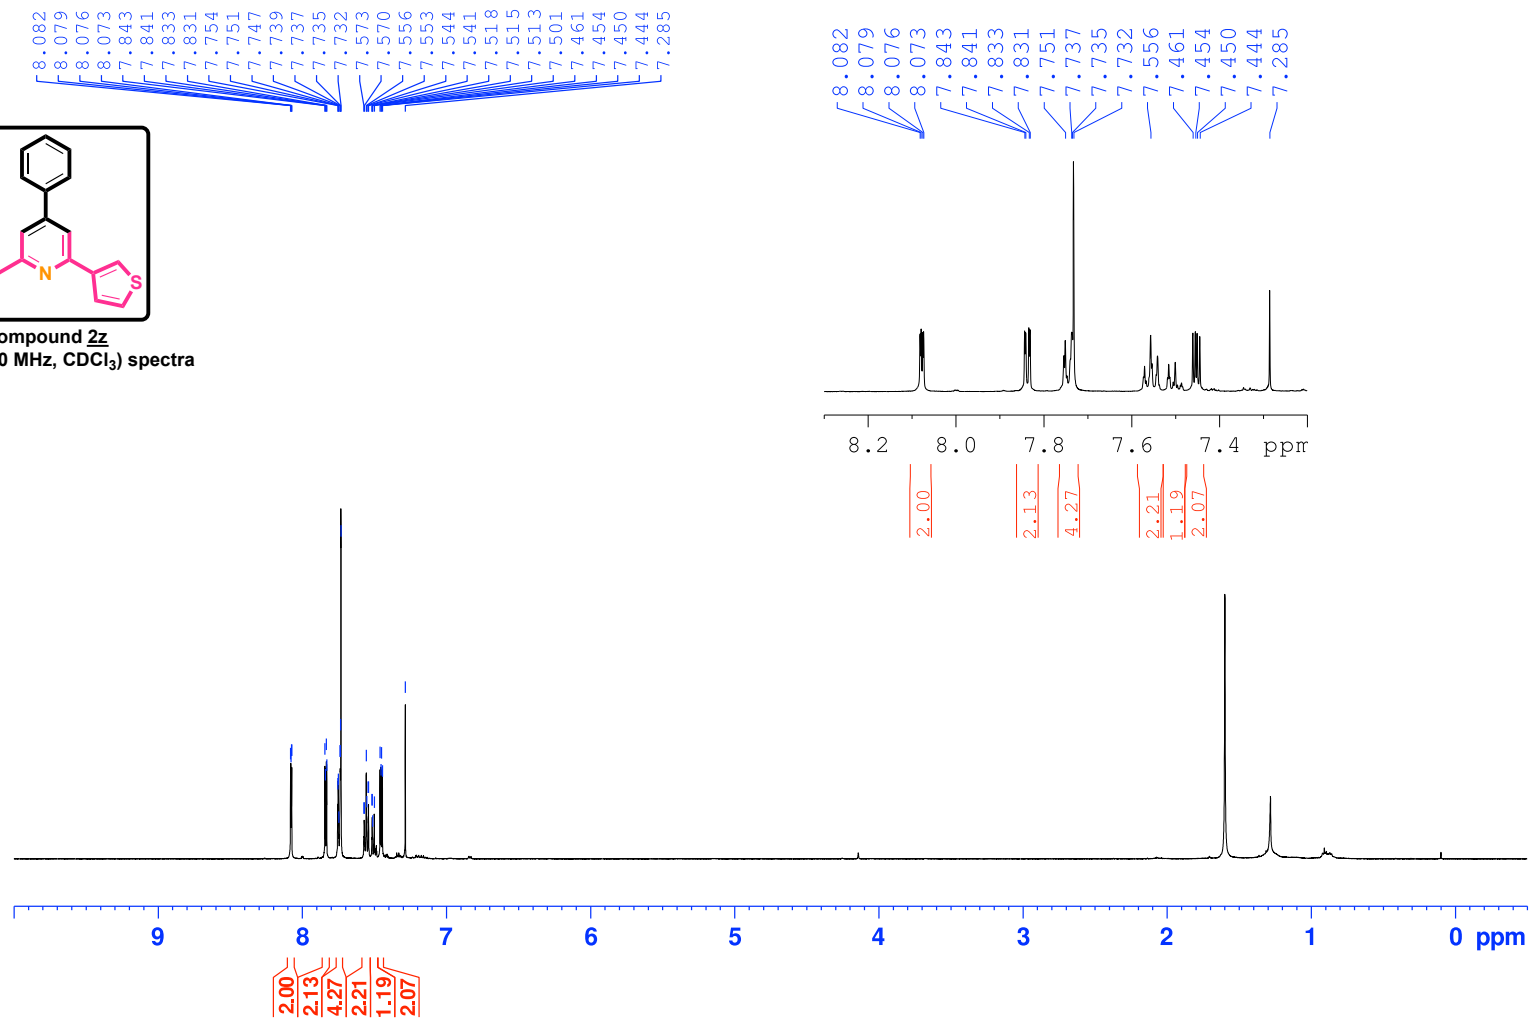

# Compound 2z

13C YHC-460 sep 15-17 top 0628

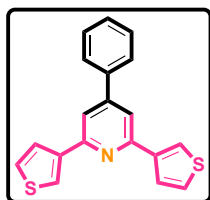

Compound 2z  
<sup>13</sup>C NMR (125 MHz, CDCl<sub>3</sub>) spectra

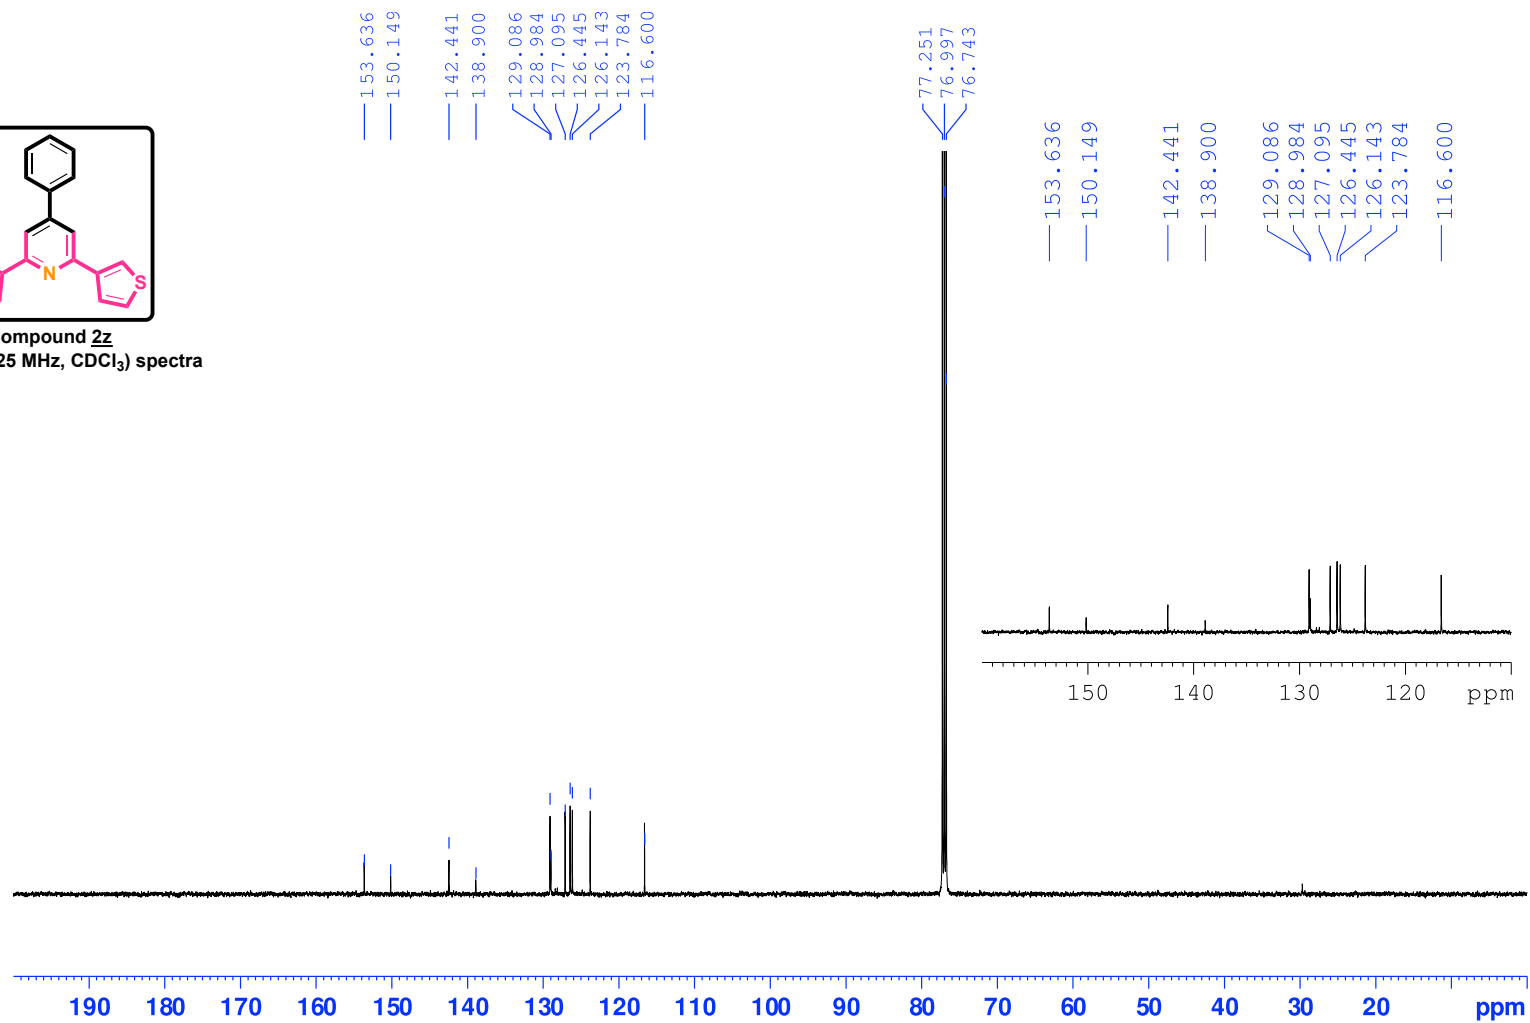

# Compound 3z

1H YHC-460 sep 35-37 down 0628

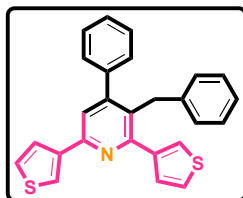

Compound 3z

<sup>1</sup>H NMR (500 MHz, CDCl<sub>3</sub>) spectra

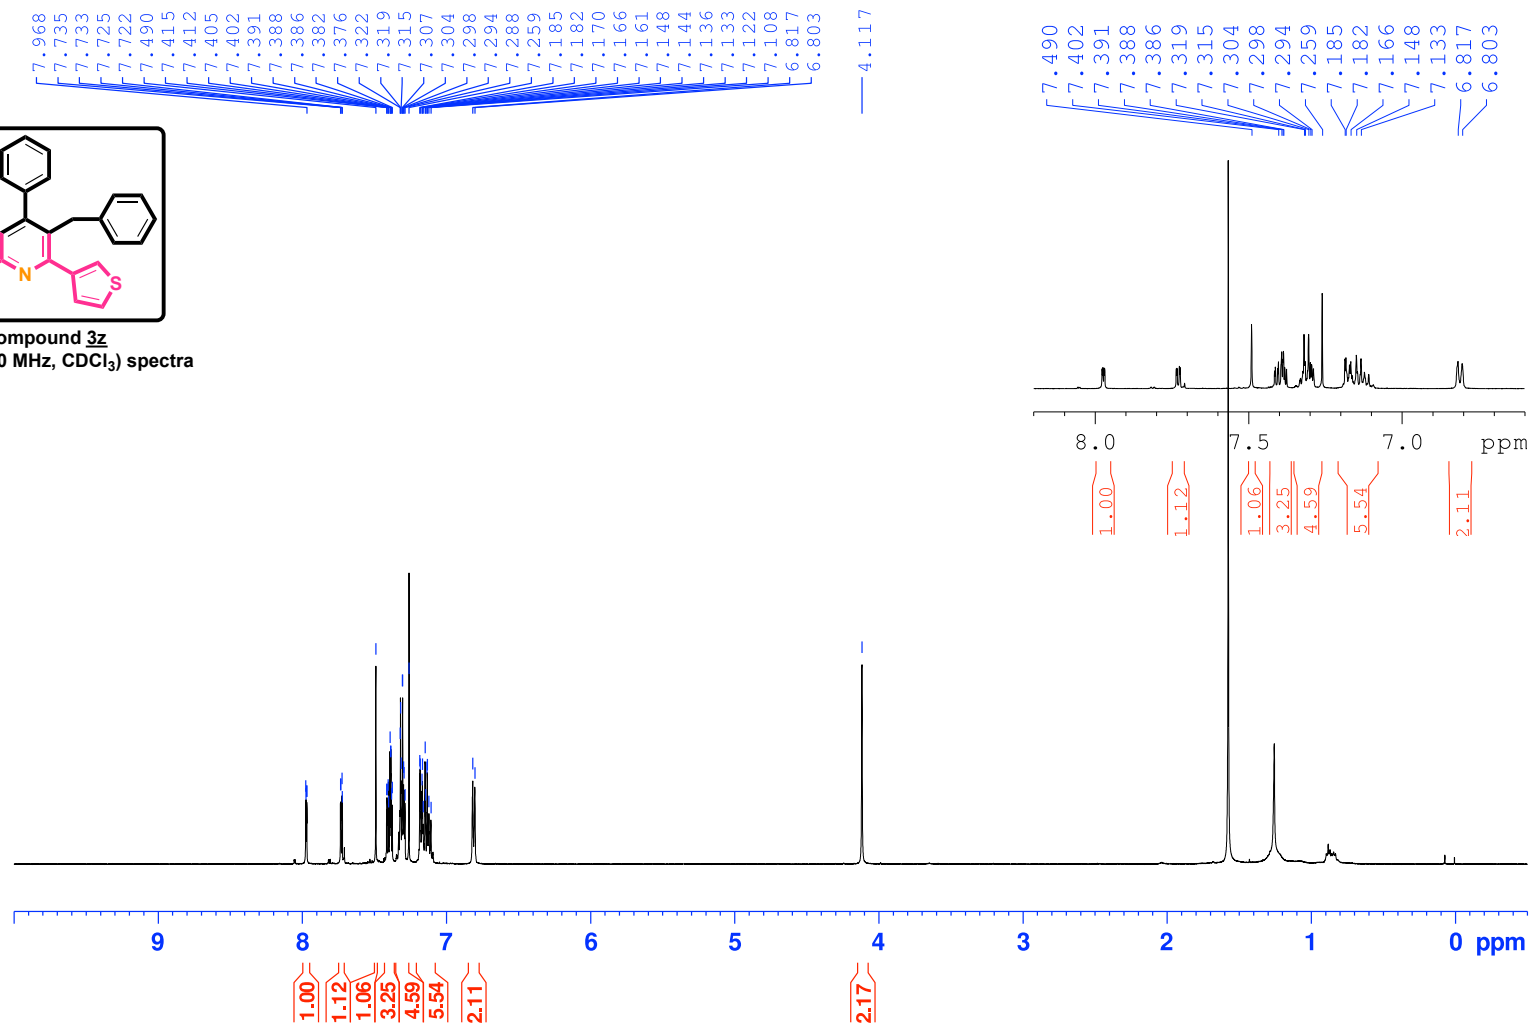

# Compound 3z

13C YHC-460 sep 35-37 down 0628

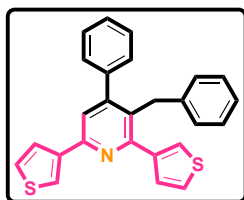

Compound 3z  
<sup>13</sup>C NMR (125 MHz, CDCl<sub>3</sub>) spectra

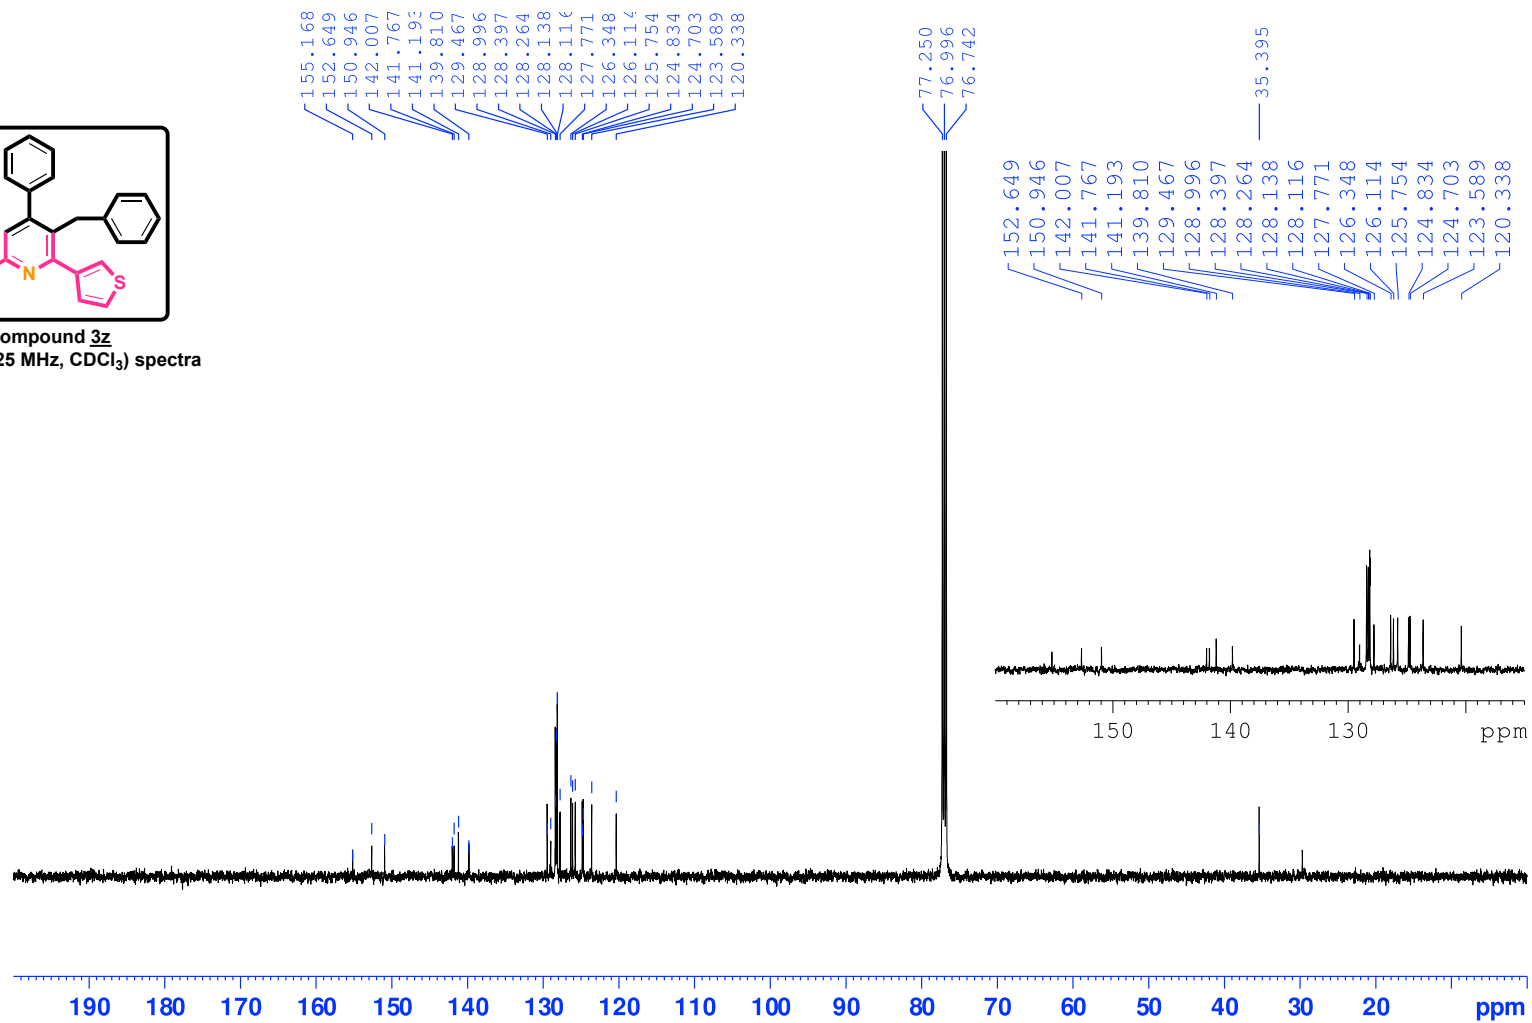

# Compound 2aa

1H YHC-461-2 sep 49-51 top 1022

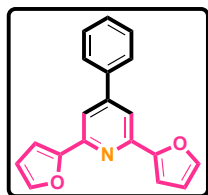

Compound 2aa

<sup>1</sup>H NMR (500 MHz, CDCl<sub>3</sub>) spectra

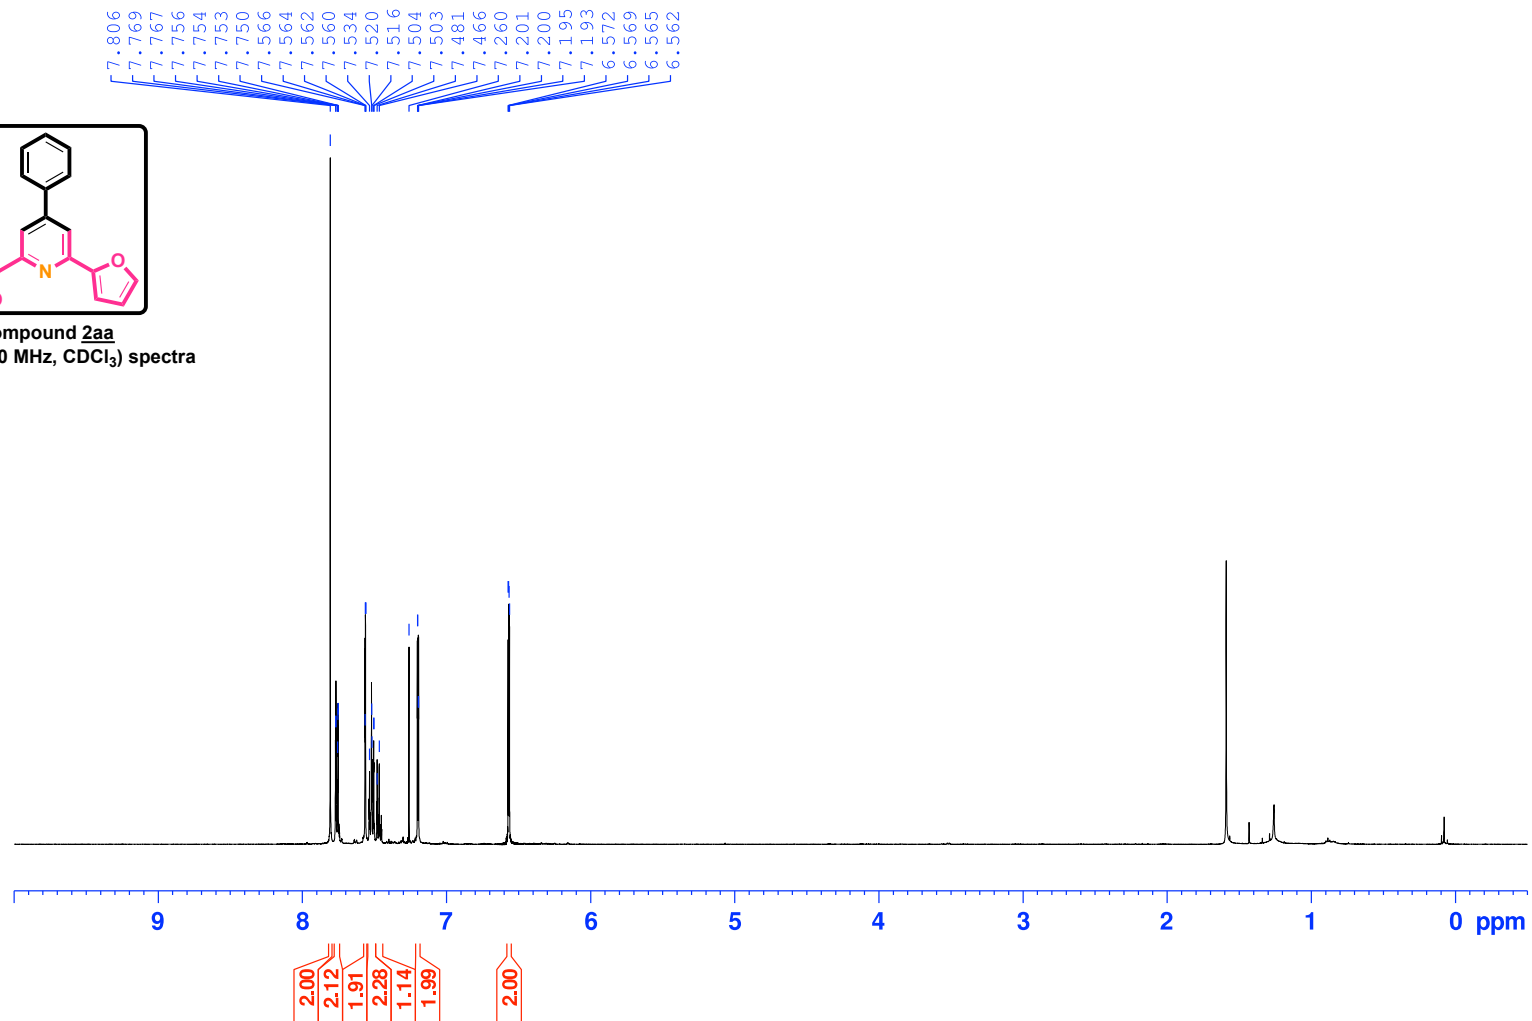



# Compound 2aa

13C YHC-461-2 sep 49-51 top 1022

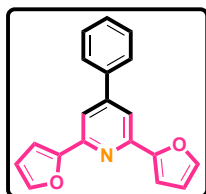

Compound 2aa

<sup>13</sup>C NMR (125 MHz, CDCl<sub>3</sub>) spectra

153.774  
149.771  
149.692  
143.282  
138.375  
129.114  
129.039  
127.029  
114.801  
112.046  
109.093  
77.248  
76.993  
76.739

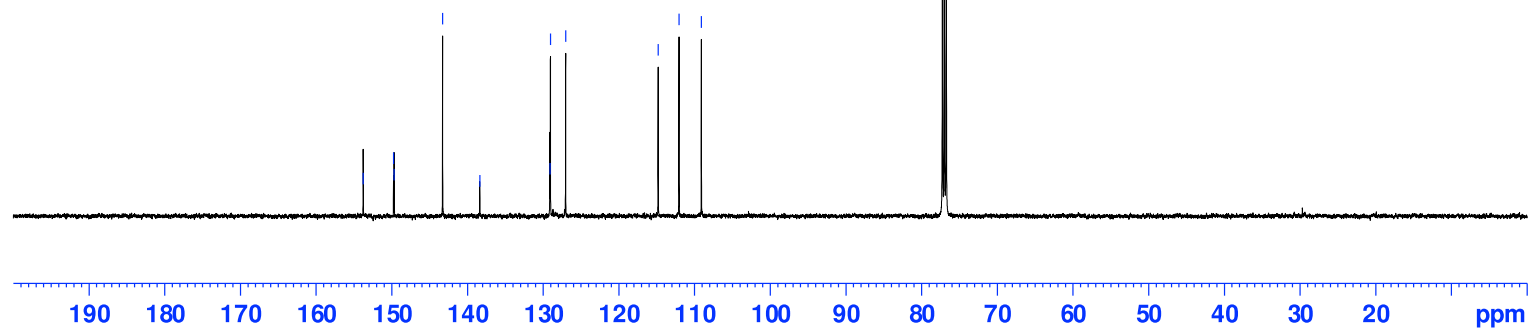

# Compound 3aa

1H YHC-461-2 sep 59-62 middle 1022

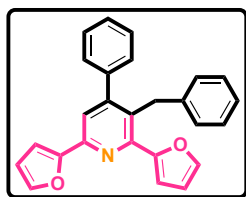

Compound 3aa

<sup>1</sup>H NMR (500 MHz, CDCl<sub>3</sub>) spectra

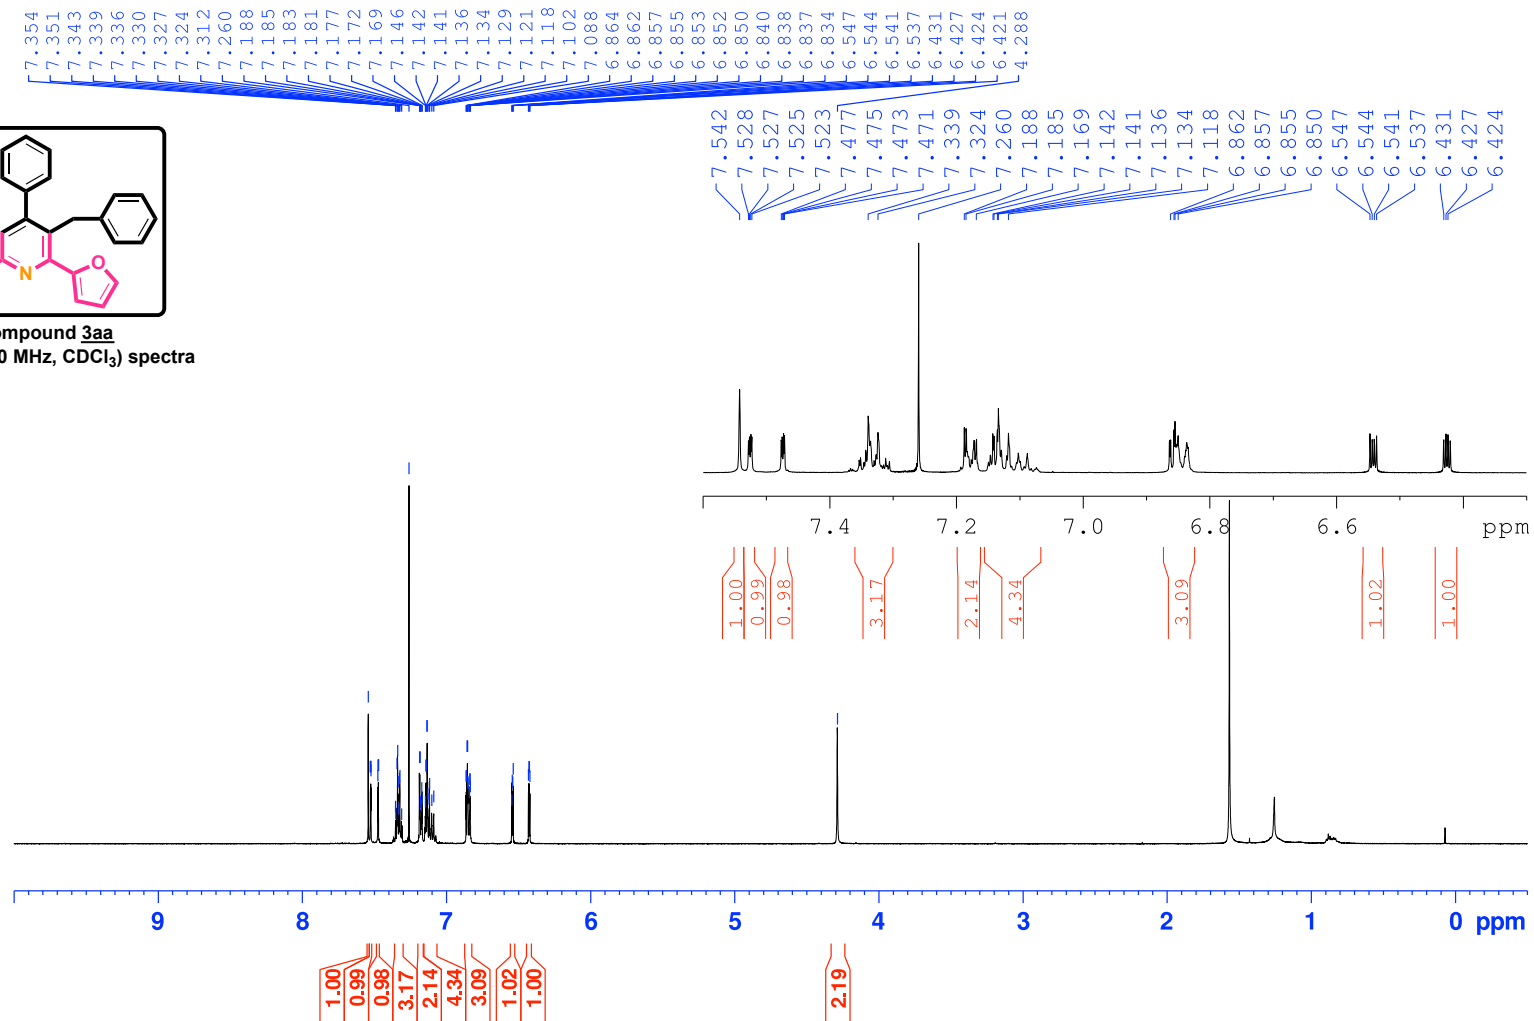

# Compound 3aa

13C YHC-461-2 sep 59-62 middle 1022

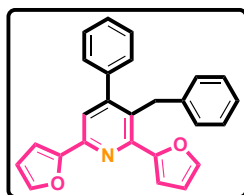

Compound 3aa

<sup>13</sup>C NMR (125 MHz, CDCl<sub>3</sub>) spectra

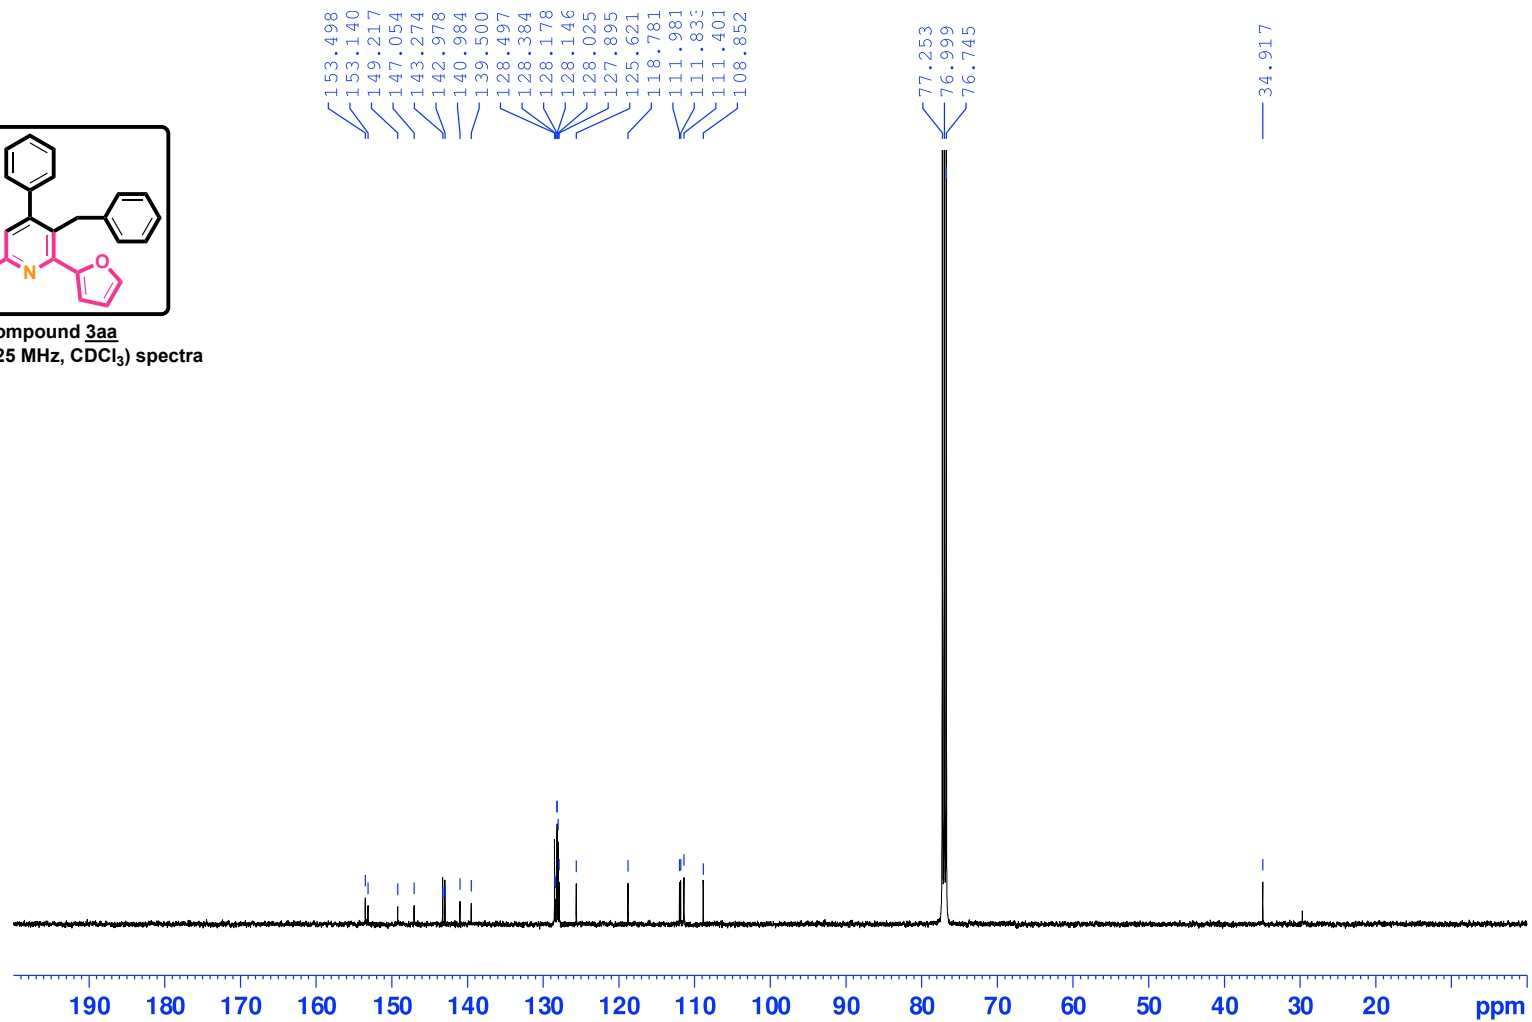

# Compound 2ab

1H YHC-458 sep 74-76 top 1020

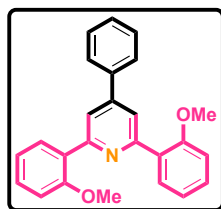

Compound 2ab

<sup>1</sup>H NMR (500 MHz, CDCl<sub>3</sub>) spectra

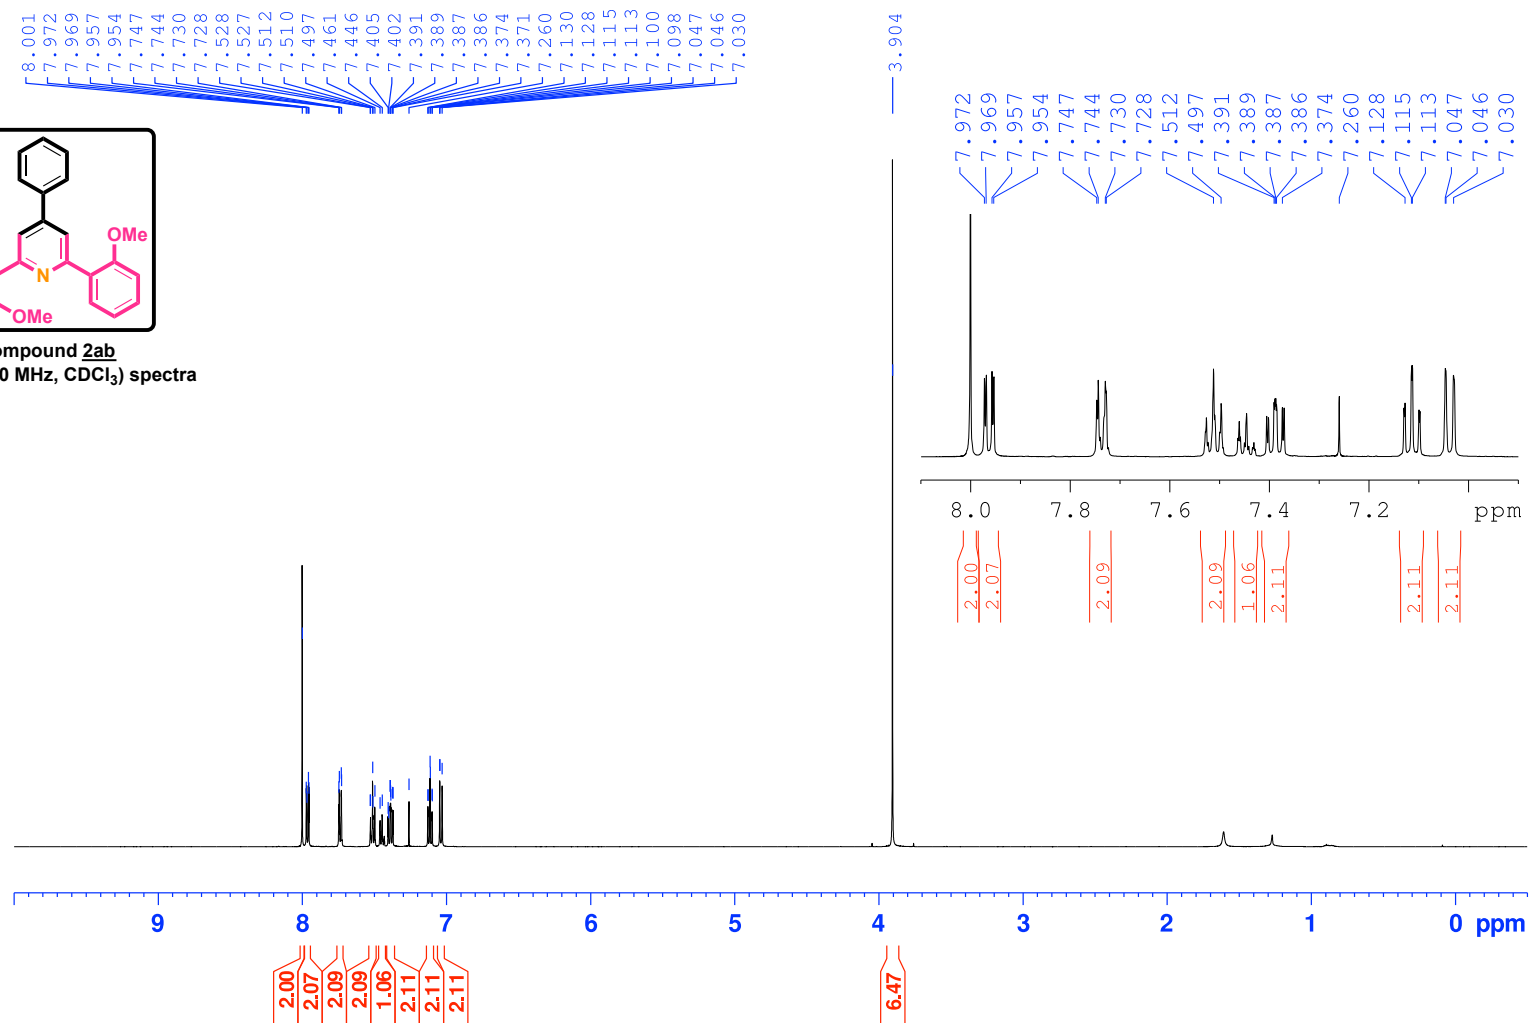

# Compound 2ab

13C YHC-458 sep 74-76 top 1020

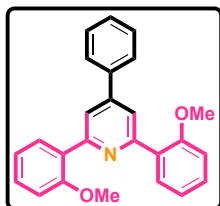

Compound 2ab

<sup>13</sup>C NMR (125 MHz, CDCl<sub>3</sub>) spectra

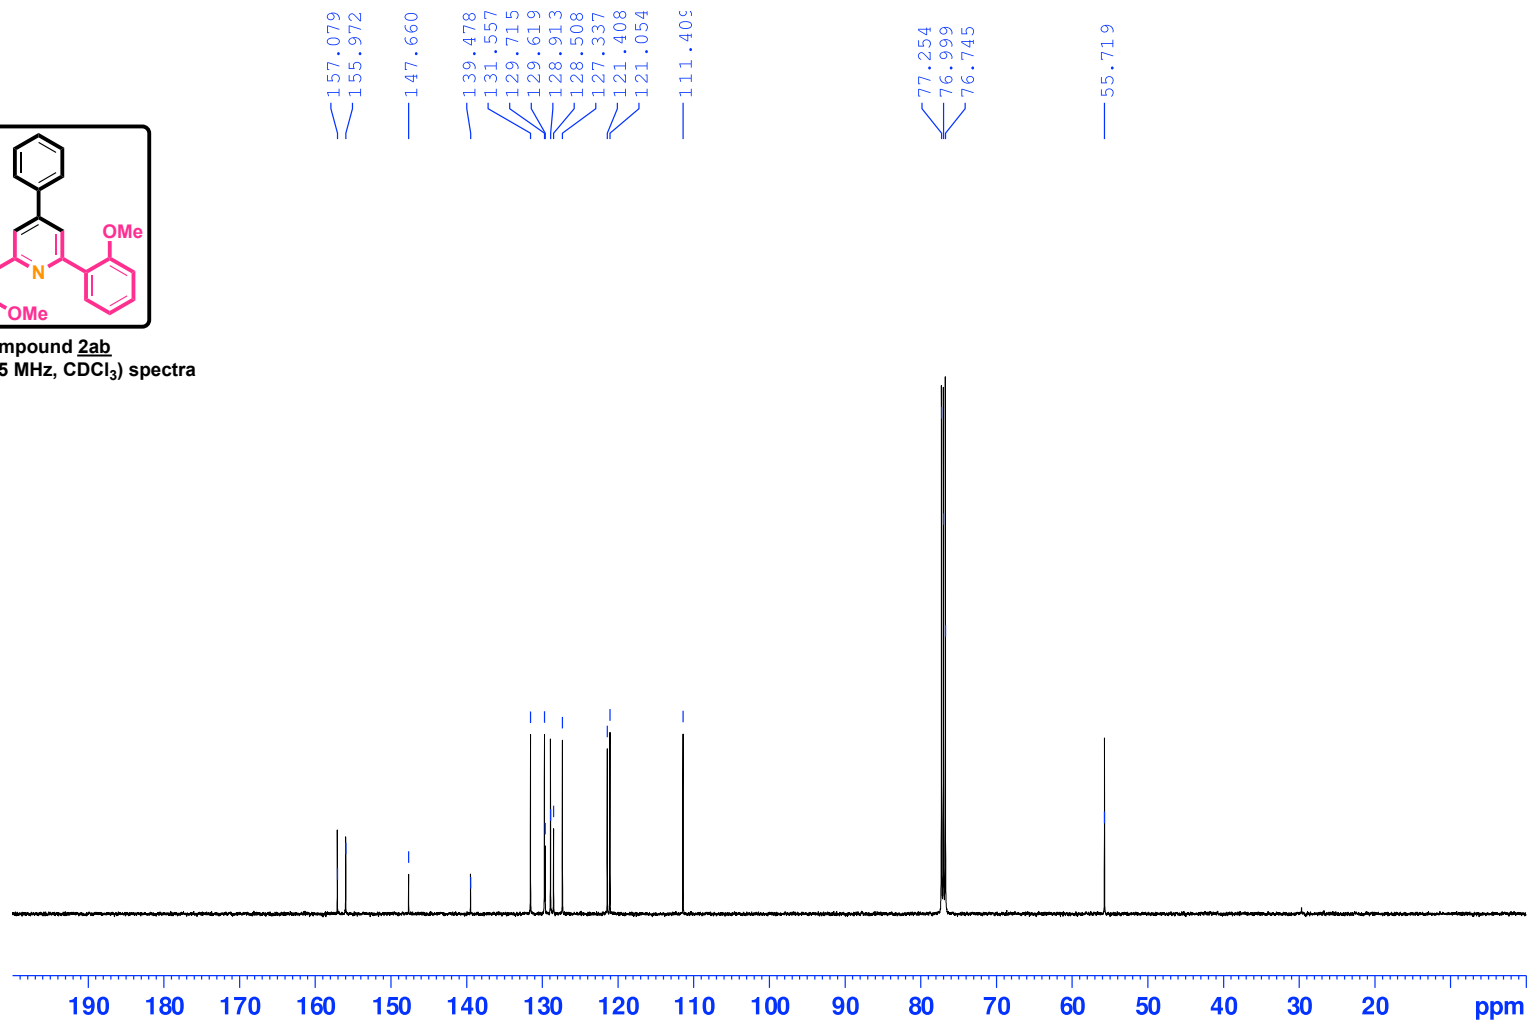

# Compound 4

1H YHC-418 sep 2728 0506

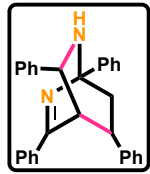

Compound 4  
<sup>1</sup>H NMR (500 MHz, CDCl<sub>3</sub>) spectra

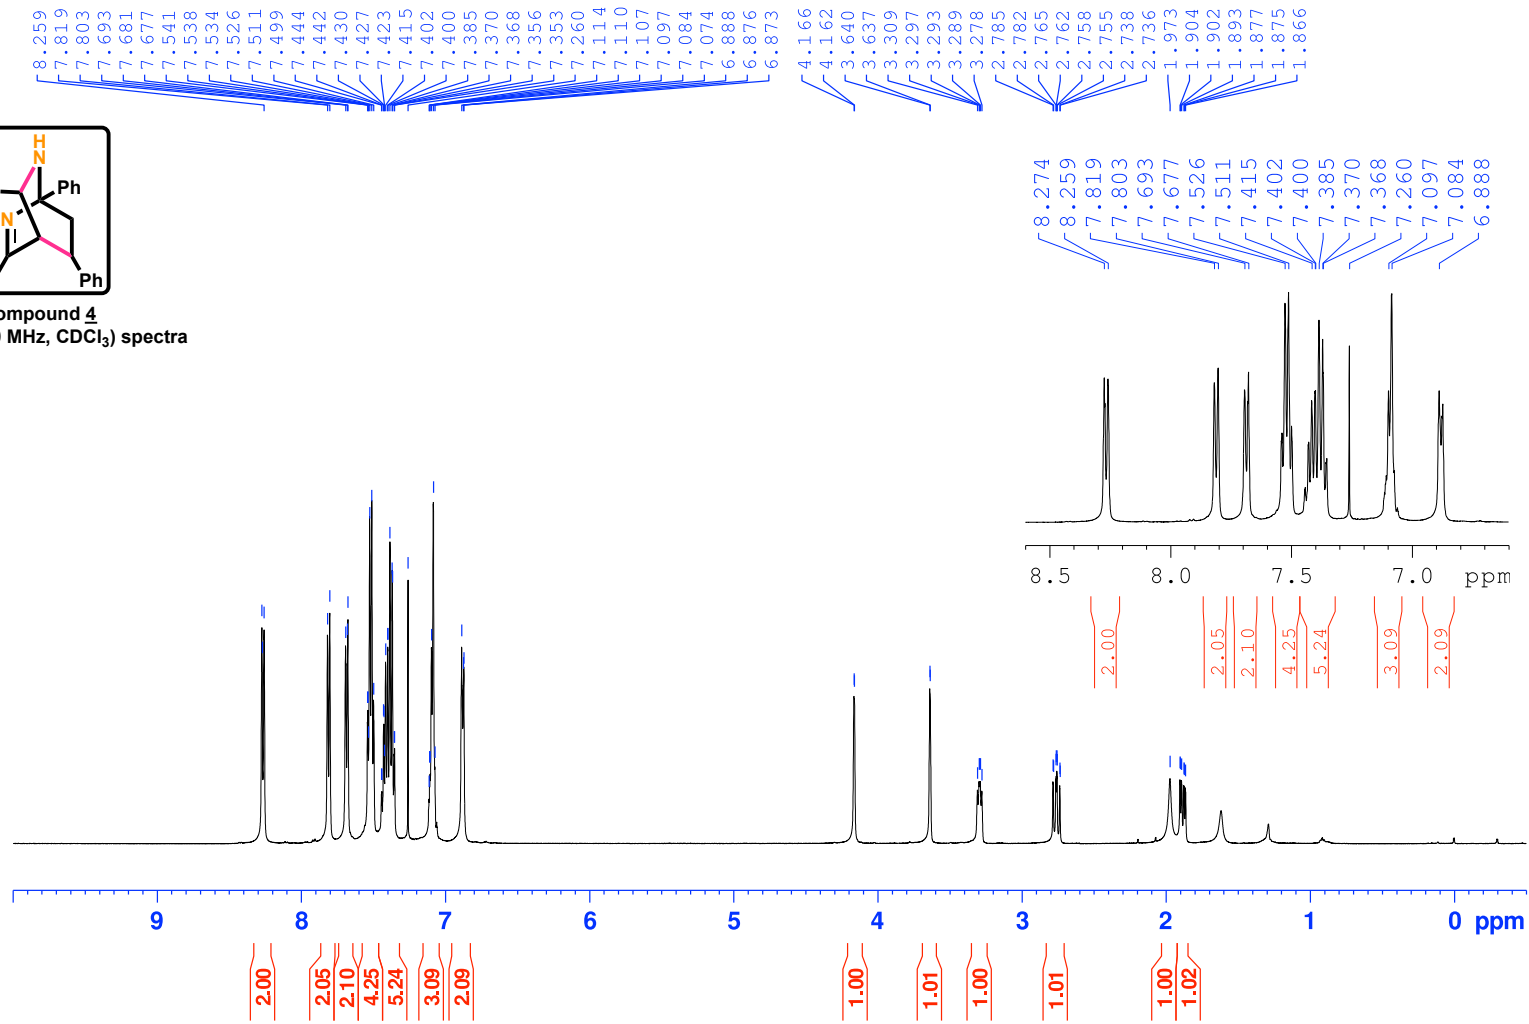

# Compound 4

13C YHC-418 sep 2728 0506

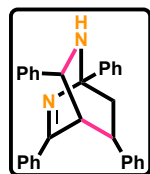

Compound 4

<sup>13</sup>C NMR (125 MHz, CDCl<sub>3</sub>) spectra

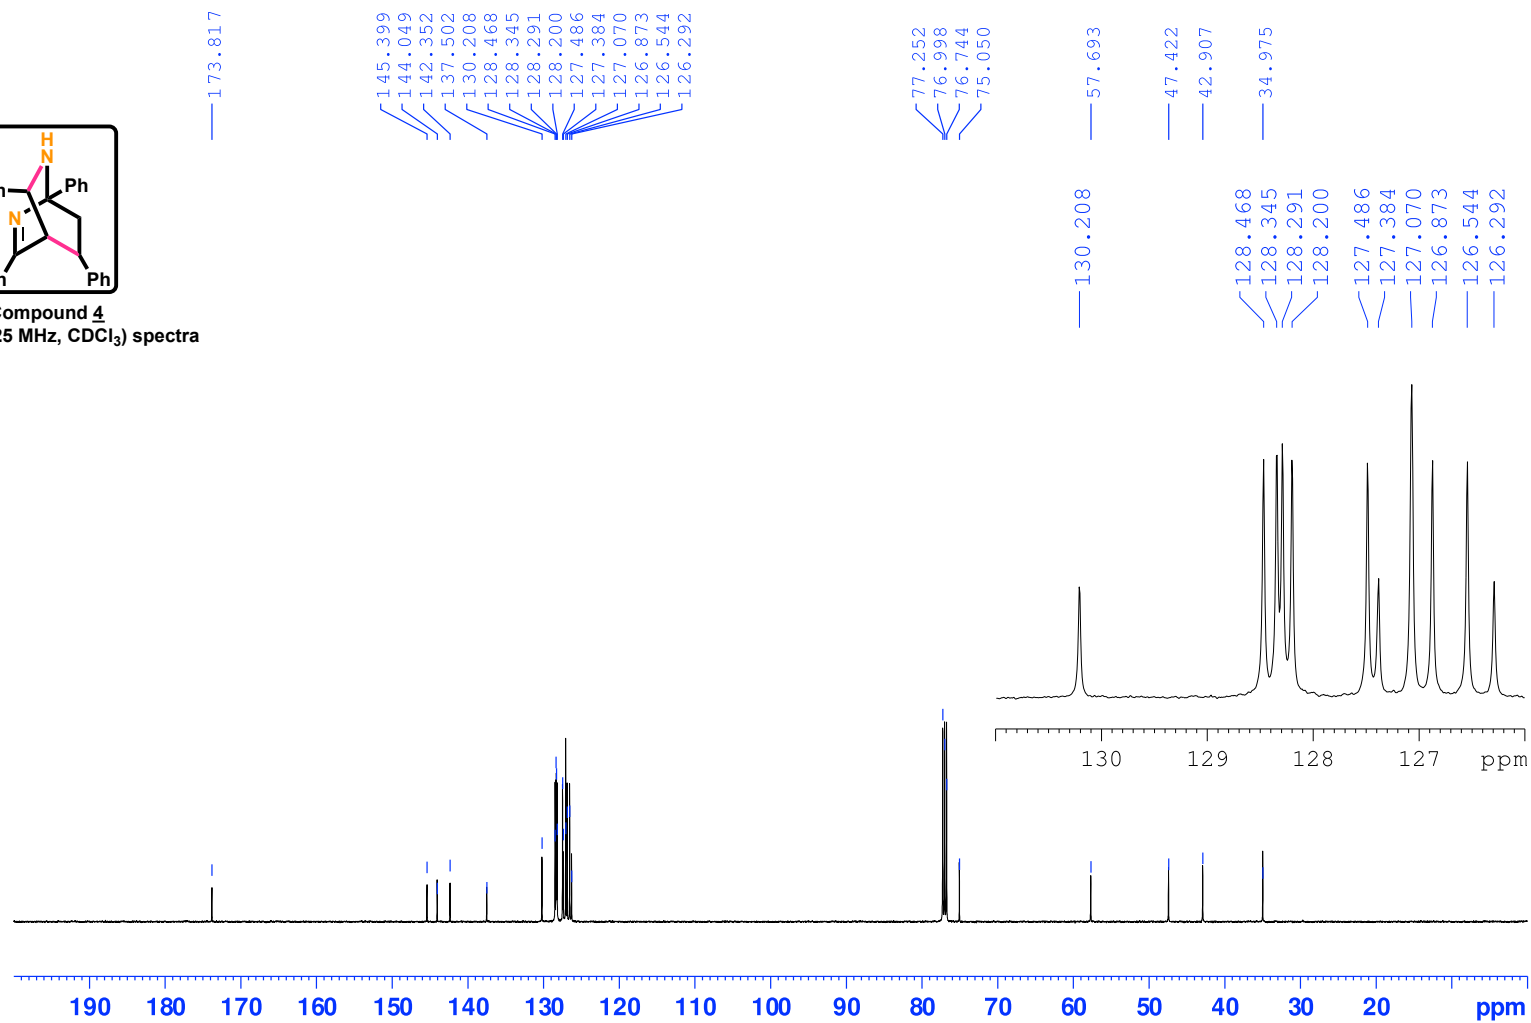

Supplement: RA-012-D2RA00084A-s001.pdf [file RA-012-D2RA00084A-s001.pdf]
